# Supplementary material for: Assessment of bidirectional relationships between brain imaging-derived phenotypes and stroke: a Mendelian randomization study
Source: Springer Nature journal article supplement (doi:10.1186/s12916-023-02982-9), 2023-07-25
Supplement: MOESM2 [file 25845512]

# Supplementary Figure 1

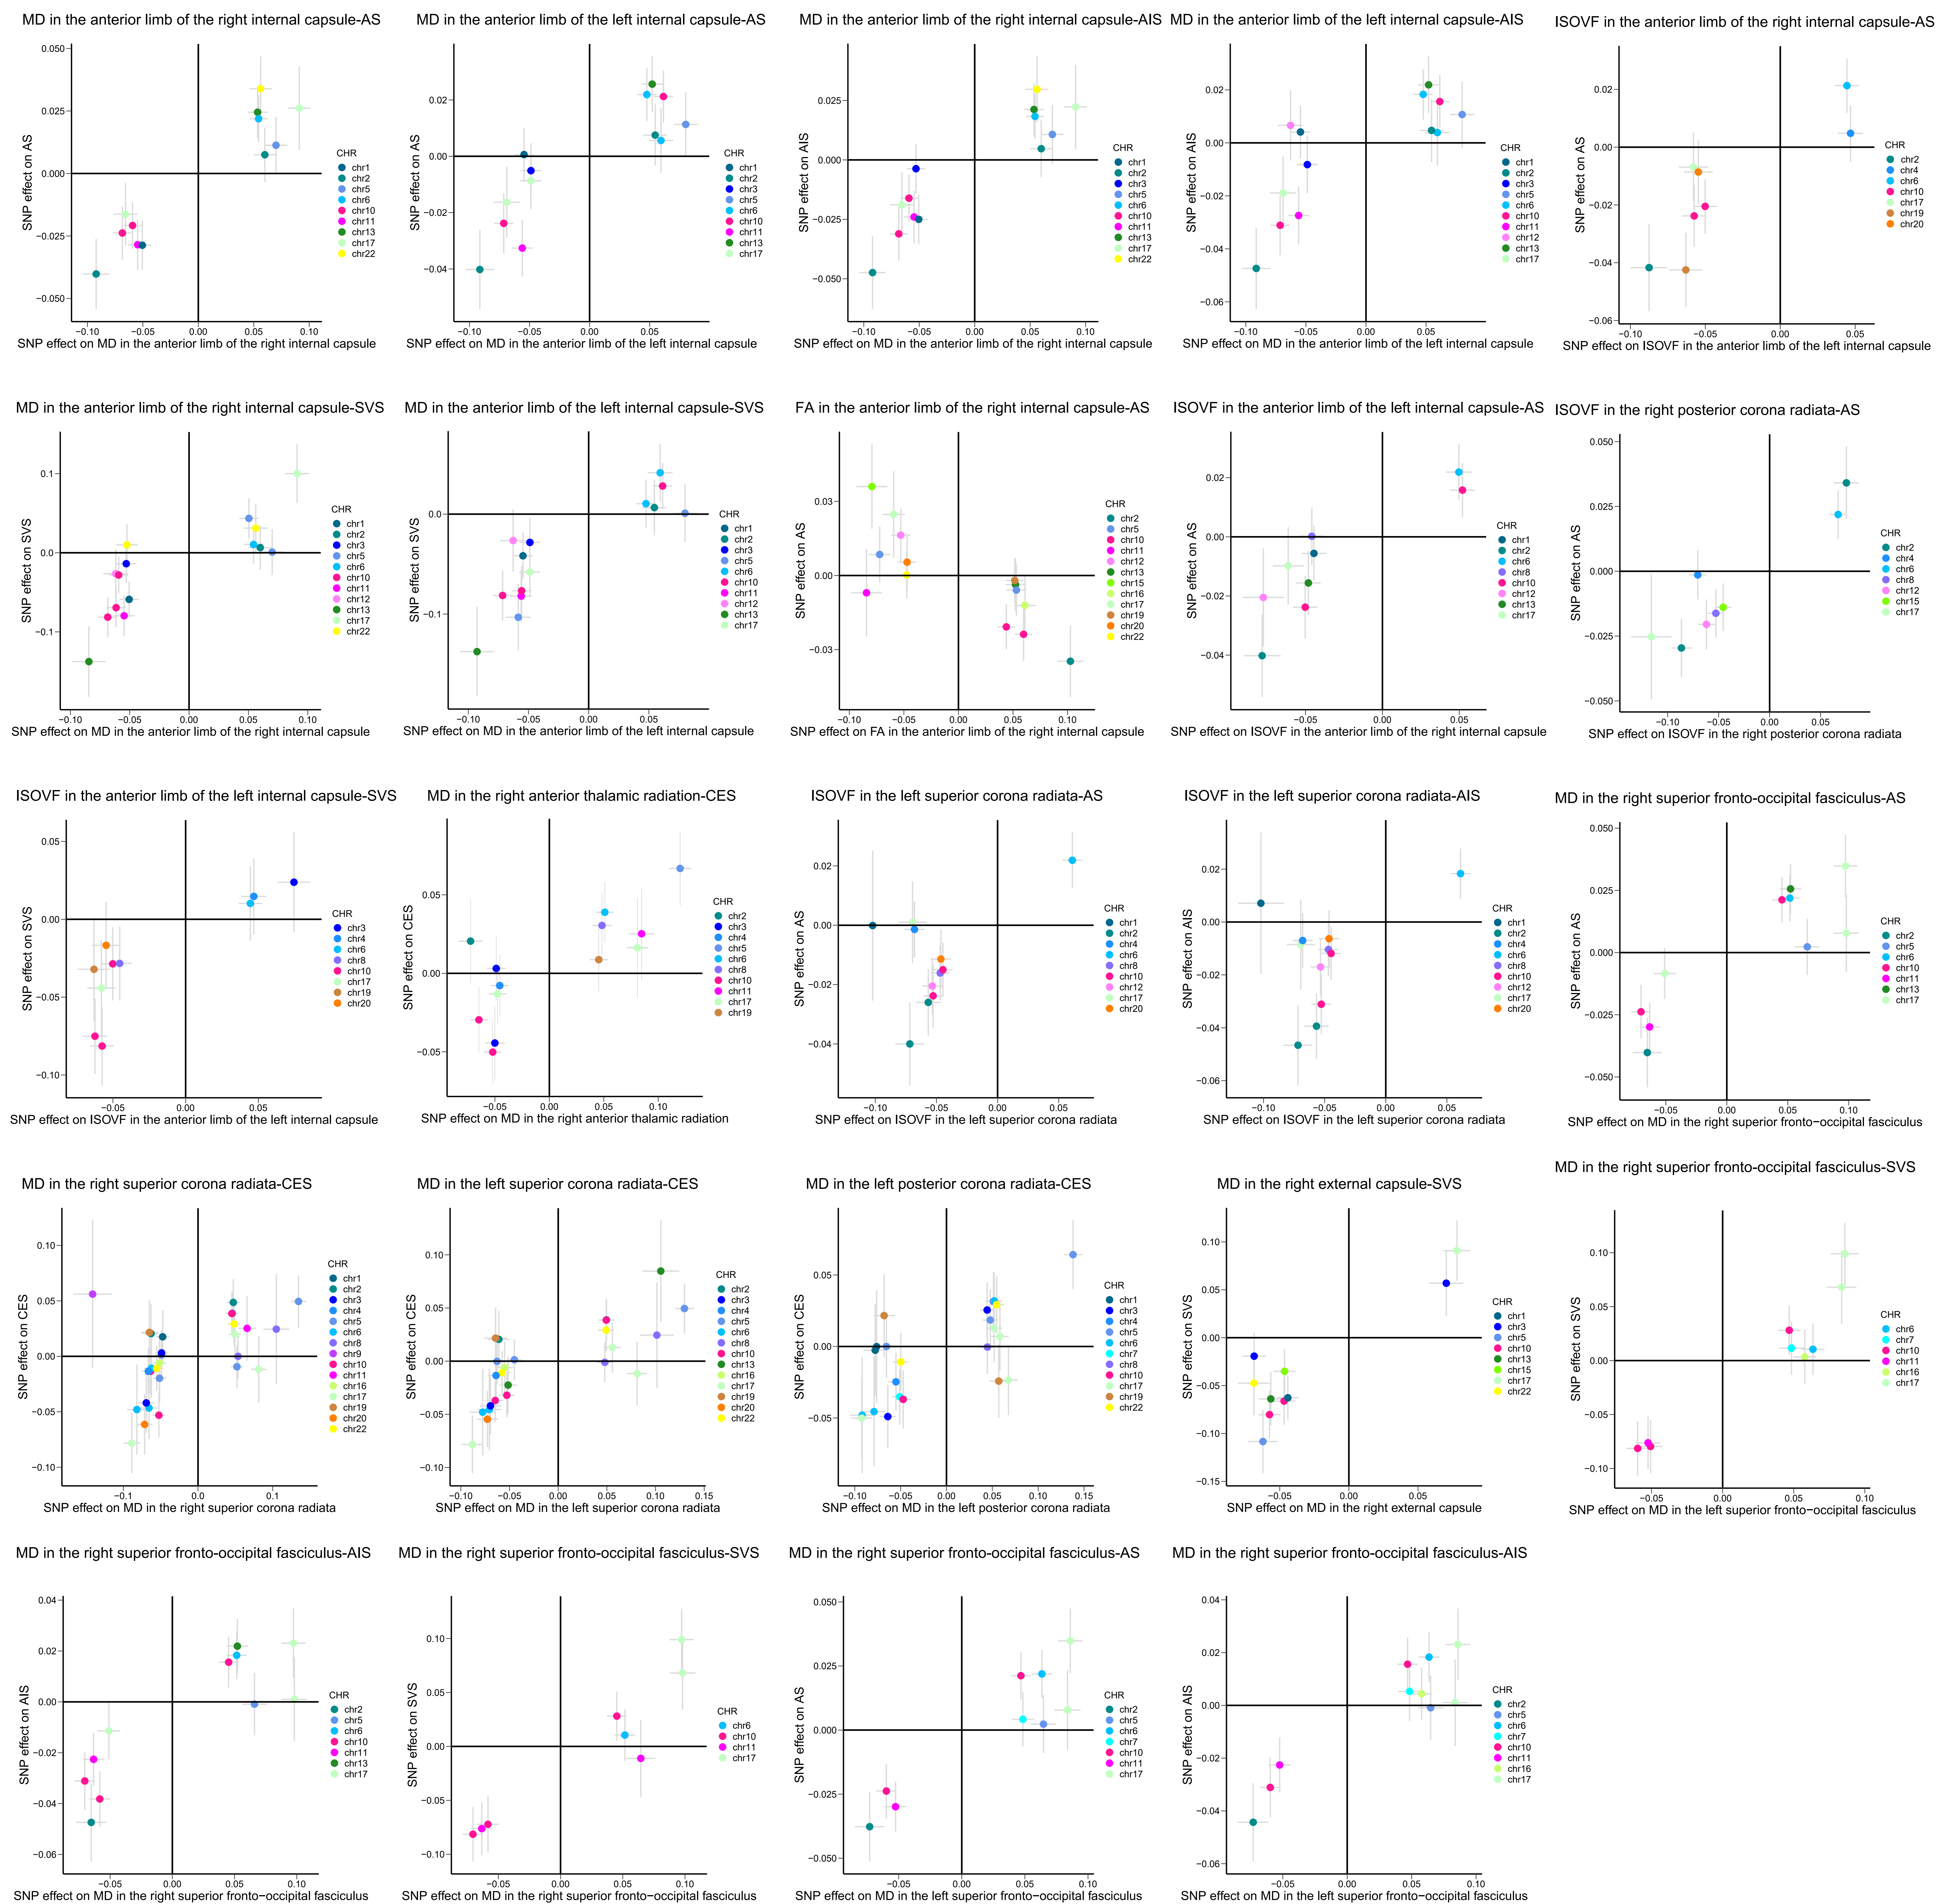

Supplementary Figure 1. Scatter plots for the exposure-outcome pairs with significant inverse-variance weighted (IVW) results in forward MR analysis. Abbreviation: AS, any stroke; AIS, any ischemic stroke; CES, cardioembolic stroke; FA, fractional anisotropy; ISOVF, isotropic volume fraction; MD, mean diffusivity; SVS, small vessel stroke.

# Supplementary Figure 2

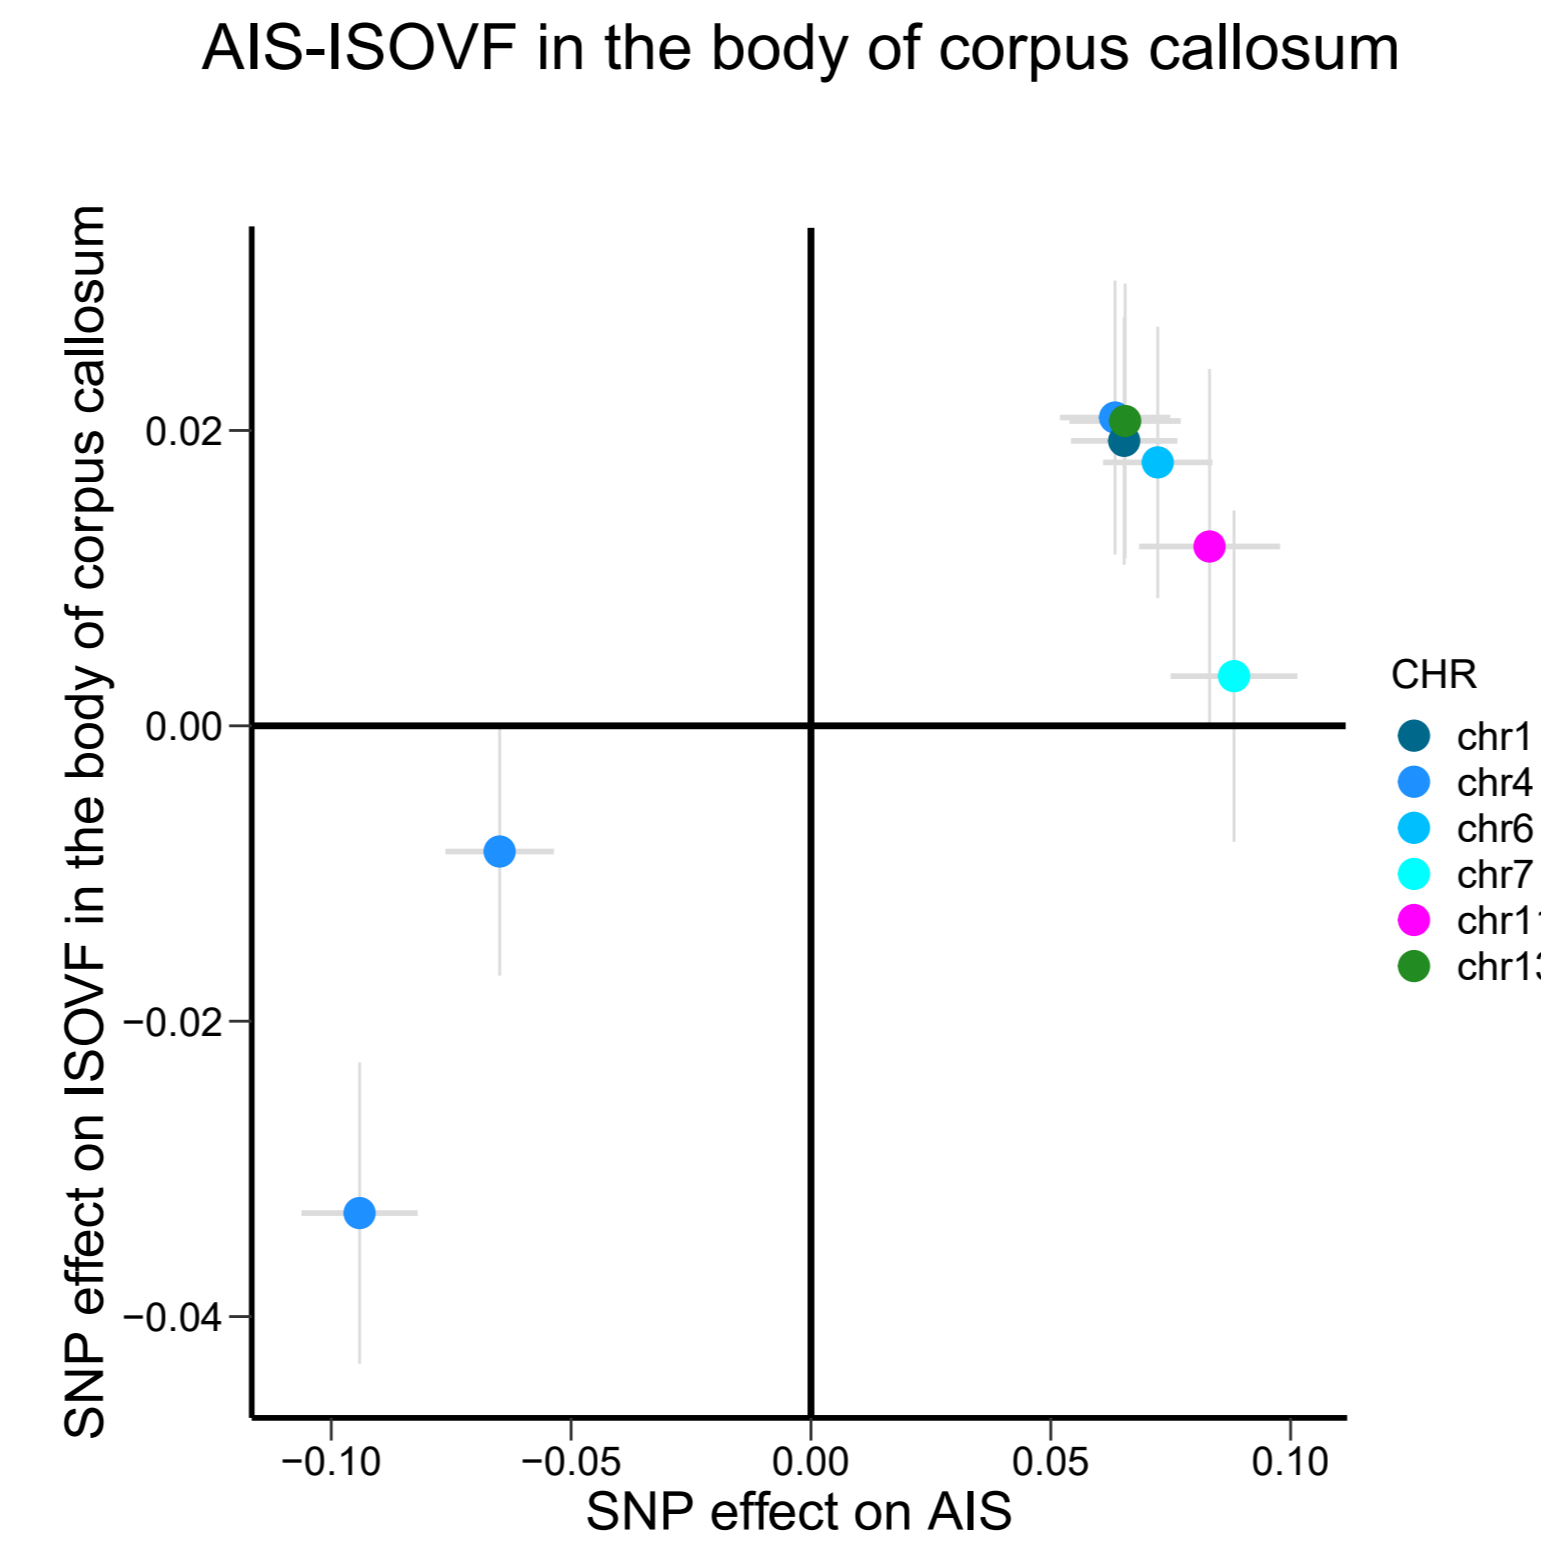

Supplementary Figure 2. Scatter plots for the exposure-outcome pairs with significant inverse-variance weighted (IVW) results in reverse MR analysis. Abbreviation: AIS, any ischemic stroke; ISOVF, isotropic volume fraction.



# Supplementary Figure 3

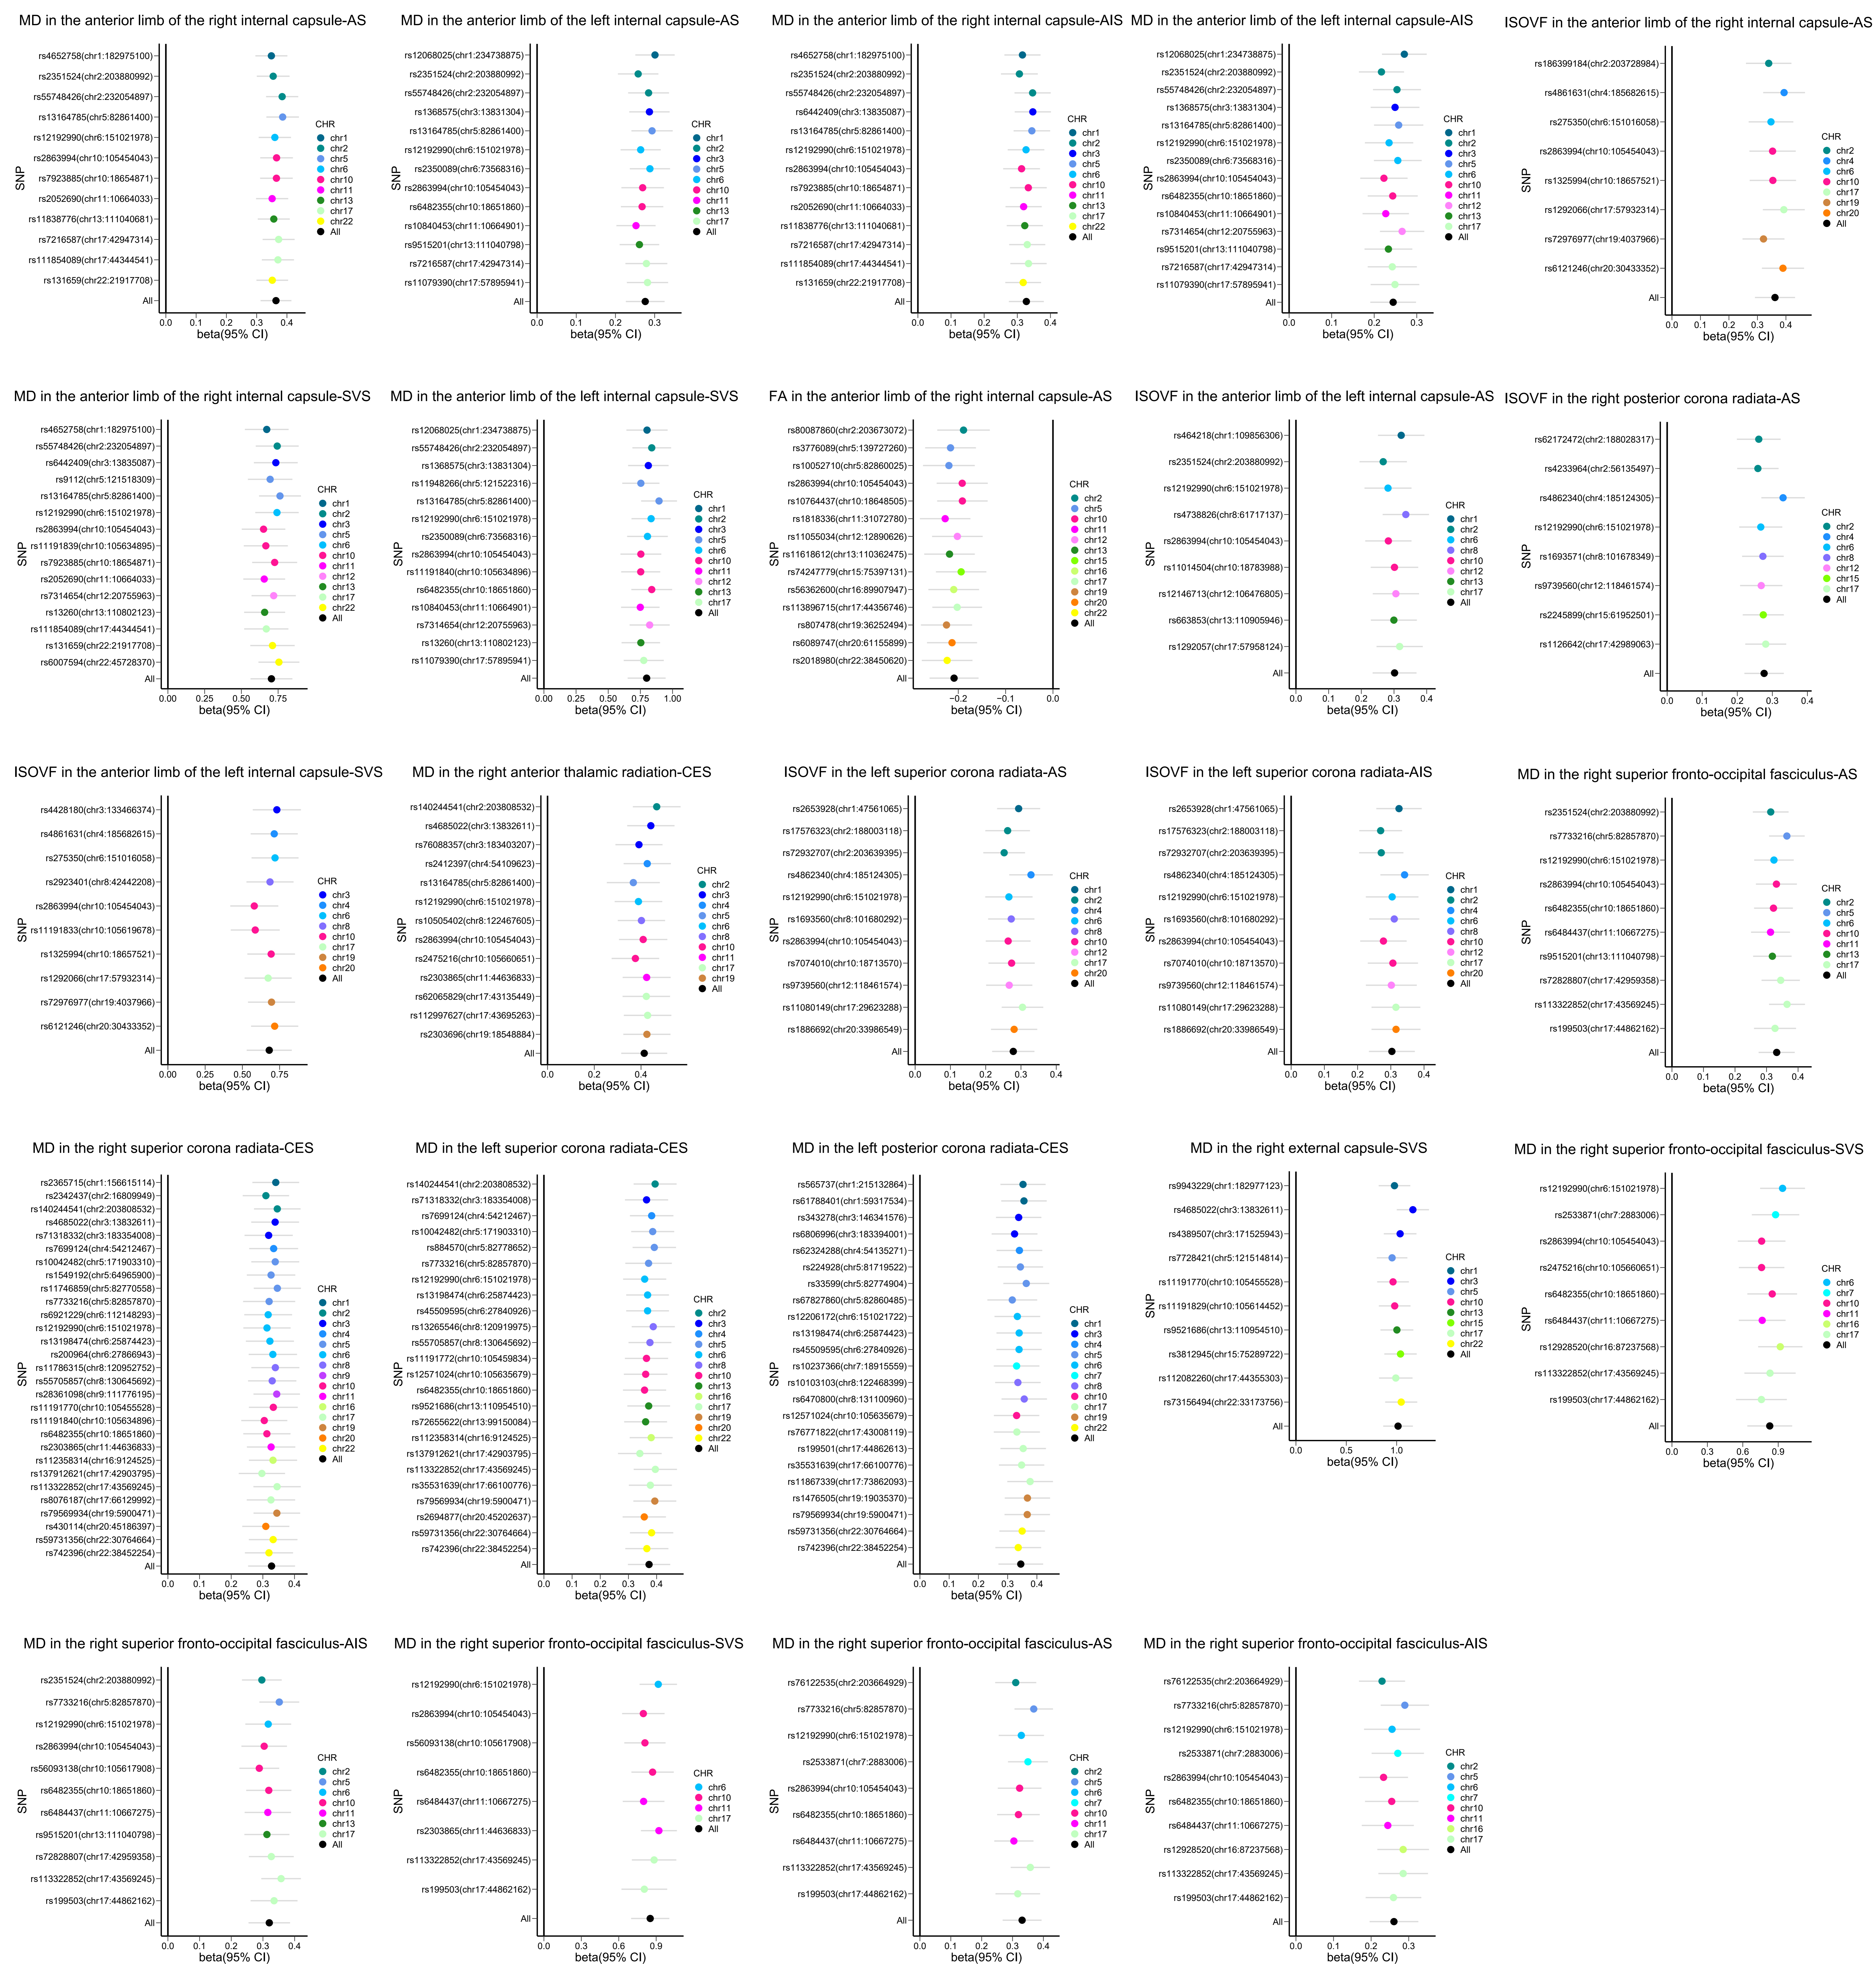

Supplementary Figure 3. Leave-one-out analysis plots for traits with significant inverse-variance weighted (IVW) results in forward MR analysis. Abbreviation: AS, any stroke; AIS, any ischemic stroke; CES, cardioembolic stroke; FA, fractional anisotropy; ISOVF, isotropic volume fraction; MD, mean diffusivity; SVS, small vessel stroke.



Supplementary Figure 4

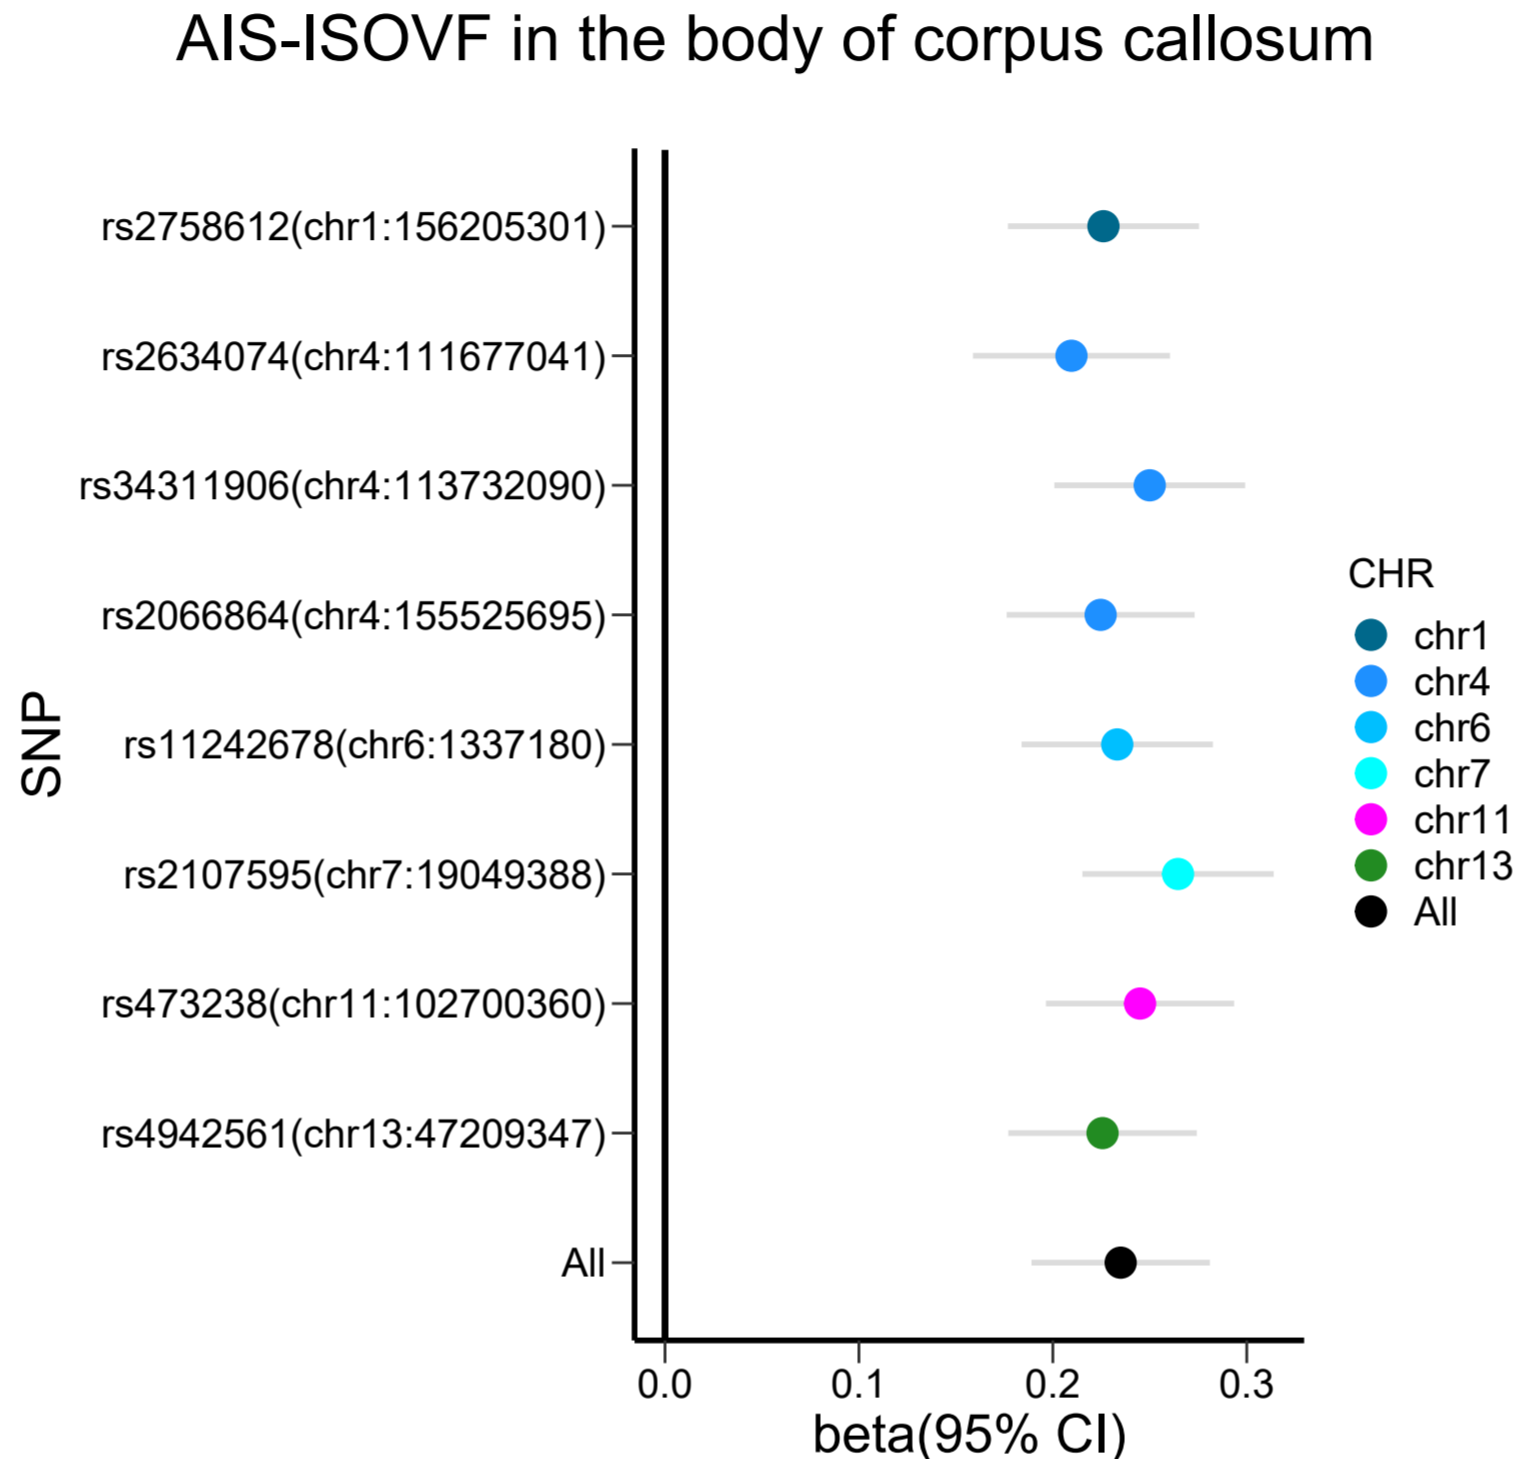

Supplementary Figure 4. Leave-one-out analysis plots for traits with significant inverse-variance weighted (IVW) results in reverse MR analysis. Abbreviation: AIS, any ischemic stroke; ISOVF, isotropic volume fraction.
