# Supplementary material for: Assessment of bidirectional relationships between brain imaging-derived phenotypes and stroke: a Mendelian randomization study
Source: BMC Med. 2023 Jul 25;21:271. doi: 10.1186/s12916-023-02982-9 (PMC10369749; doi:10.1186/s12916-023-02982-9)
Supplement: Supplementary file 1 — Additional file 1: Table S1. Information for the GWAS summary data used in this study. Table S2. Genetic correlation between IDPs and strokes. Table S3. Outliers detected by RadialMR in forward MR. Table S4. Outliers detected by RadialMR in reverse MR. Table S5. IVs associated with confounders in forward MR. Table S6. IVs associated with confounders in reverse MR. Table S7. The information of IVs for all exposure-outcome pairs in forward MR. Table S8. The information of IVs for all exposure-outcome pairs in reverse MR. Table S9. Forward MR analysis results. Table S10. Reverse MR analysis results. Table S11. Pleiotropy test for significant results of the forward MR. Table S12. Pleiotropy test for significant results of the reverse MR. [file 12916_2023_2982_MOESM1_ESM.xlsx]

## Sheet: Index
Table	Contents
Table S1	Information for the GWAS summary data used in this study.
Table S2	Genetic correlation between IDPs and strokes.
Table S3	Outliers detected by RadialMR in forward MR
Table S4	Outliers detected by RadialMR in reverse MR
Table S5	IVs associated with confounders in forward MR
Table S6	IVs associated with confounders in reverse MR
Table S7	The information of IVs for all exposure-outcome pairs in forward MR
Table S8	The information of IVs for all exposure-outcome pairs in reverse MR
Table S9	Forward MR analysis results
Table S10	Reverse MR analysis results
Table S11	Pleiotropy test for significant results of the forward MR
Table S12	Pleiotropy test for significant results of the reverse MR

## Sheet: Table S1
Table S1: Information for the GWAS summary data used in this study.
Stroke and stroke subtypes	Abbreviation	Consortium	Sample_N	Cases_N
Brain imaging-derived phenotypes1	IDP	UK Biobank	33224	/
Any stroke2	AS	ISGC	446696	40585
any ischemic stroke	AIS	ISGC	438847	34217
large artery stroke	LAS	ISGC	301663	4373
cardioembolic stroke	CES	ISGC	362661	7193
small vessel stroke	SVS	ISGC	348946	5386
Abbreviation:	International Stroke Genetics Consortium(ISGC)
References	Number	Citation
	1	Smith, S.M., et al., An expanded set of genome-wide association studies of brain imaging phenotypes in UK Biobank. Nature Neuroscience, 2021. 24(5): p. 737-745.
	2	Malik et al. Multiancestry genome-wide association study of 520,000 subjects identifies 32 loci associated with stroke and stroke subtypes, Nature Genetics, 2018, 50 : 524-537.

## Sheet: Table S2
Table S2: Genetic correlation between IDPs and strokes
Phenotype 1			Phenotype 2	GC
IDP name	Tissue/Region	IDP ID	Disorder	Rg	SE	Z score	P value
ISOVF in the anterior limb of the right internal capsule	Projection fibers	IDP.2068	AS	0.5241	0.0751	6.977	3.02e-12
ISOVF in the right superior corona radiata	Projection fibers	IDP.2076	AS	0.5168	0.0804	6.4262	1.31e-10
ISOVF in the left superior corona radiata	Projection fibers	IDP.2077	AS	0.461	0.0725	6.3556	2.08e-10
ISOVF in the anterior limb of the right internal capsule	Projection fibers	IDP.2068	AIS	0.4739	0.0749	6.33	2.45e-10
ISOVF in the right superior corona radiata	Projection fibers	IDP.2076	AIS	0.4734	0.0754	6.2763	3.47e-10
ISOVF in the anterior limb of the left internal capsule	Projection fibers	IDP.2069	AS	0.4768	0.077	6.1951	5.82e-10
ISOVF in the left superior corona radiata	Projection fibers	IDP.2077	AIS	0.4084	0.0701	5.8273	5.63e-09
ISOVF in the left anterior corona radiata	Projection fibers	IDP.2075	AS	0.3897	0.0691	5.6351	1.75e-08
ISOVF in the anterior limb of the left internal capsule	Projection fibers	IDP.2069	AIS	0.4344	0.0777	5.5916	2.25e-08
ISOVF in the right anterior corona radiata	Projection fibers	IDP.2074	AS	0.387	0.0704	5.4978	3.85e-08
MD in the anterior limb of the right internal capsule	Projection fibers	IDP.1618	AS	0.3853	0.0702	5.4859	4.11e-08
ISOVF in the left anterior corona radiata	Projection fibers	IDP.2075	AIS	0.3455	0.0658	5.2516	1.51e-07
MD in the anterior limb of the left internal capsule	Projection fibers	IDP.1619	AS	0.3426	0.0663	5.1663	2.39e-07
ISOVF in the left anterior thalamic radiation	Projection fibers	IDP.2102	AS	0.4185	0.081	5.1654	2.4e-07
ISOVF in the right anterior corona radiata	Projection fibers	IDP.2074	AIS	0.3505	0.0686	5.1055	3.3e-07
ISOVF in the right anterior thalamic radiation	Projection fibers	IDP.2103	AS	0.4177	0.0828	5.0448	4.54e-07
MD in the anterior limb of the right internal capsule	Projection fibers	IDP.1618	AIS	0.3231	0.0654	4.9427	7.71e-07
ISOVF in the left anterior thalamic radiation	Projection fibers	IDP.2102	AIS	0.3829	0.0778	4.919	8.7e-07
Volume of the white matter hyperintensities	Total brain	IDP.0179	AS	0.3552	0.0724	4.9059	9.3e-07
ISOVF in the right anterior thalamic radiation	Projection fibers	IDP.2103	AIS	0.3893	0.0803	4.8507	1.23e-06
ISOVF in the right superior thalamic radiation	Projection fibers	IDP.2124	AS	0.366	0.0758	4.8309	1.36e-06
FA in the anterior limb of the right internal capsule	Projection fibers	IDP.1468	AS	-0.2618	0.0543	-4.8187	1.44e-06
MD in the left anterior thalamic radiation	Projection fibers	IDP.1796	AS	0.2951	0.0621	4.7548	1.99e-06
ISOVF in the left superior thalamic radiation	Projection fibers	IDP.2123	AS	0.3312	0.0716	4.6227	3.79e-06
ISOVF in the left posterior thalamic radiation	Projection fibers	IDP.2081	AS	0.3602	0.0793	4.5447	5.5e-06
ISOVF in the left superior longitudinal fasciculus	Association fibers	IDP.2093	AS	0.3081	0.0678	4.5425	5.56e-06
ISOVF in the posterior limb of the left internal capsule	Projection fibers	IDP.2071	AIS	0.4826	0.1065	4.5323	5.84e-06
Volume of the white matter hyperintensities	Total brain	IDP.0179	AIS	0.3074	0.0682	4.5093	6.5e-06
MD in the left superior corona radiata	Projection fibers	IDP.1627	AS	0.2609	0.0582	4.4804	7.45e-06
ISOVF in the left posterior corona radiata	Projection fibers	IDP.2079	AS	0.3093	0.0691	4.478	7.53e-06
MD in the anterior limb of the left internal capsule	Projection fibers	IDP.1619	AIS	0.281	0.063	4.4584	8.26e-06
ISOVF in the right posterior thalamic radiation	Projection fibers	IDP.2080	AS	0.3206	0.0725	4.421	9.83e-06
MD in the right superior corona radiata	Projection fibers	IDP.1626	AS	0.2592	0.0586	4.4208	9.83e-06
MD in the right external capsule	Association fibers	IDP.1634	AS	0.2963	0.0676	4.3822	1.17e-05
ISOVF in the posterior limb of the left internal capsule	Projection fibers	IDP.2071	AS	0.505	0.1158	4.3608	1.3e-05
ISOVF in the right superior thalamic radiation	Projection fibers	IDP.2124	AIS	0.3263	0.0752	4.34	1.43e-05
MD in the right anterior thalamic radiation	Projection fibers	IDP.1797	AS	0.2849	0.0657	4.3353	1.46e-05
ISOVF in the left superior longitudinal fasciculus	Association fibers	IDP.2093	AIS	0.2918	0.0678	4.3021	1.69e-05
ISOVF in the right posterior thalamic radiation	Projection fibers	IDP.2080	AIS	0.3198	0.0747	4.2821	1.85e-05
ISOVF in the left external capsule	Association fibers	IDP.2085	AS	0.3384	0.0794	4.2634	2.01e-05
OD in the left inferior cerebellar peduncle	Brainstem tracts	IDP.1988	AS	0.2733	0.0645	4.2407	2.23e-05
MD in the left posterior corona radiata	Projection fibers	IDP.1629	AS	0.2474	0.0588	4.2083	2.57e-05
ISOVF in the right superior longitudinal fasciculus	Association fibers	IDP.2092	AS	0.2955	0.0703	4.2048	2.61e-05
ISOVF in the left superior thalamic radiation	Projection fibers	IDP.2123	AIS	0.2991	0.0713	4.1928	2.76e-05
ISOVF in the left posterior thalamic radiation	Projection fibers	IDP.2081	AIS	0.3507	0.084	4.1774	2.95e-05
MD in the left external capsule	Association fibers	IDP.1635	AS	0.2955	0.0715	4.1321	3.59e-05
MD in the left anterior corona radiata	Projection fibers	IDP.1625	AS	0.2214	0.0542	4.0832	4.44e-05
MD in the posterior limb of the right internal capsule	Projection fibers	IDP.1620	AS	0.2294	0.0567	4.0487	5.15e-05
ISOVF in the left inferior fronto-occipital fasciculus	Association fibers	IDP.2112	AS	0.2751	0.0693	3.9702	7.18e-05
ISOVF in the right superior longitudinal fasciculus	Association fibers	IDP.2092	AIS	0.2746	0.0692	3.9679	7.25e-05
MD in the left posterior thalamic radiation	Projection fibers	IDP.1631	AS	0.239	0.0607	3.9399	8.15e-05
MD in the right superior fronto-occipital fasciculus	Association fibers	IDP.1644	AS	0.2787	0.0707	3.9389	8.19e-05
MD in the left anterior thalamic radiation	Projection fibers	IDP.1796	AIS	0.2305	0.0587	3.9296	8.51e-05
MD in the body of corpus callosum	Commissural fibers	IDP.1605	AS	0.1985	0.0505	3.9291	8.53e-05
MD in the right posterior thalamic radiation	Projection fibers	IDP.1630	AS	0.2418	0.0618	3.9151	9.04e-05
OD in the right inferior cerebellar peduncle	Brainstem tracts	IDP.1987	AS	0.2416	0.0619	3.9015	9.56e-05
ISOVF in the left inferior fronto-occipital fasciculus	Association fibers	IDP.2112	AIS	0.2701	0.0695	3.8881	0.0001
ISOVF in the right superior fronto-occipital fasciculus	Association fibers	IDP.2094	AS	0.3816	0.1004	3.7997	0.0001
ISOVF in the posterior limb of the right internal capsule	Projection fibers	IDP.2070	AS	0.4551	0.1197	3.8016	0.0001
ISOVF in the left superior fronto-occipital fasciculus	Association fibers	IDP.2095	AS	0.3896	0.1016	3.836	0.0001
MD in the right posterior corona radiata	Projection fibers	IDP.1628	AS	0.2234	0.0589	3.7925	0.0001
ISOVF in the body of corpus callosum	Commissural fibers	IDP.2055	AS	0.2308	0.0594	3.8828	0.0001
ISOVF in the right external capsule	Association fibers	IDP.2084	AS	0.2915	0.078	3.7344	0.0002
FA in the anterior limb of the right internal capsule	Projection fibers	IDP.1468	AIS	-0.2052	0.0546	-3.7599	0.0002
MD in the right inferior fronto-occipital fasciculus	Association fibers	IDP.1807	AS	0.1914	0.0519	3.6836	0.0002
ISOVF in the left posterior corona radiata	Projection fibers	IDP.2079	AIS	0.2661	0.0712	3.7398	0.0002
ISOVF in the retrolenticular part of the left internal capsule	Projection fibers	IDP.2073	AIS	0.3194	0.0869	3.6736	0.0002
ISOVF in the left external capsule	Association fibers	IDP.2085	AIS	0.292	0.0776	3.7643	0.0002
MD in the left superior fronto-occipital fasciculus	Association fibers	IDP.1645	AS	0.277	0.075	3.6908	0.0002
MD in the left superior thalamic radiation	Projection fibers	IDP.1817	AS	0.2378	0.0634	3.7475	0.0002
ISOVF in the retrolenticular part of the left internal capsule	Projection fibers	IDP.2073	AS	0.3262	0.089	3.6657	0.0002
MD in the right superior corona radiata	Projection fibers	IDP.1626	AIS	0.2057	0.0553	3.7204	0.0002
MD in the left inferior fronto-occipital fasciculus	Association fibers	IDP.1806	AS	0.2082	0.0568	3.6678	0.0002
OD in the left inferior cerebellar peduncle	Brainstem tracts	IDP.1988	AIS	0.2326	0.0635	3.6657	0.0002
MD in the left superior corona radiata	Projection fibers	IDP.1627	AIS	0.208	0.0554	3.7544	0.0002
ISOVF in the right sagittal stratum	Association fibers	IDP.2082	AS	0.2804	0.0746	3.7605	0.0002
MD in the right posterior thalamic radiation	Projection fibers	IDP.1630	AIS	0.2271	0.0613	3.7044	0.0002
MD in the right anterior thalamic radiation	Projection fibers	IDP.1797	AIS	0.2233	0.0598	3.7305	0.0002
ISOVF in the anterior limb of the right internal capsule	Projection fibers	IDP.2068	SVS	0.7746	0.2115	3.6631	0.0002
MD in the right anterior corona radiata	Projection fibers	IDP.1624	AS	0.1964	0.0528	3.7216	0.0002
MD in the right external capsule	Association fibers	IDP.1634	AIS	0.2347	0.0653	3.596	0.0003
ISOVF in the right inferior fronto-occipital fasciculus	Association fibers	IDP.2113	AS	0.2408	0.0672	3.5856	0.0003
MD in the left posterior thalamic radiation	Projection fibers	IDP.1631	AIS	0.2167	0.06	3.6133	0.0003
ISOVF in the right inferior fronto-occipital fasciculus	Association fibers	IDP.2113	AIS	0.2429	0.0668	3.6356	0.0003
OD in the right inferior cerebellar peduncle	Brainstem tracts	IDP.1987	AIS	0.2141	0.0599	3.5767	0.0003
ISOVF in the right posterior corona radiata	Projection fibers	IDP.2078	AS	0.2676	0.0733	3.6519	0.0003
ISOVF in the forceps minor	Commissural fibers	IDP.2111	AS	0.2465	0.0696	3.5394	0.0004
MD in the right sagittal stratum	Association fibers	IDP.1632	AS	0.2077	0.0587	3.5392	0.0004
FA in the anterior limb of the left internal capsule	Projection fibers	IDP.1469	AS	-0.1928	0.0549	-3.5102	0.0004
ISOVF in the body of corpus callosum	Commissural fibers	IDP.2055	AIS	0.1971	0.0561	3.5152	0.0004
FA in the left inferior cerebellar peduncle	Brainstem tracts	IDP.1463	AS	-0.2031	0.0583	-3.4855	0.0005
ISOVF in the posterior limb of the right internal capsule	Projection fibers	IDP.2070	AIS	0.3791	0.1102	3.4399	0.0006
ISOVF in the left anterior corona radiata	Projection fibers	IDP.2075	SVS	0.6341	0.1845	3.4365	0.0006
MD in the left external capsule	Association fibers	IDP.1635	AIS	0.2337	0.0682	3.4264	0.0006
FA in the anterior limb of the right internal capsule	Projection fibers	IDP.1468	SVS	-0.588	0.1709	-3.4401	0.0006
MD in the forceps minor	Commissural fibers	IDP.1805	AS	0.1915	0.0561	3.4169	0.0006
MO in the left inferior cerebellar peduncle	Brainstem tracts	IDP.1538	AIS	-0.2396	0.0698	-3.4341	0.0006
ISOVF in the anterior limb of the left internal capsule	Projection fibers	IDP.2069	SVS	0.7227	0.2141	3.3757	0.0007
MD in the right superior thalamic radiation	Projection fibers	IDP.1818	AS	0.2233	0.0657	3.3977	0.0007
ISOVF in the left inferior longitudinal fasciculus	Association fibers	IDP.2114	AS	0.2309	0.0689	3.3516	0.0008
ISOVF in the right sagittal stratum	Association fibers	IDP.2082	AIS	0.2547	0.0762	3.3431	0.0008
ISOVF in the right superior corona radiata	Projection fibers	IDP.2076	SVS	0.6345	0.1885	3.3669	0.0008
MD in the anterior limb of the right internal capsule	Projection fibers	IDP.1618	SVS	0.6889	0.2057	3.3497	0.0008
MD in the retrolenticular part of the left internal capsule	Projection fibers	IDP.1623	AS	0.2261	0.0675	3.3493	0.0008
ISOVF in the left superior fronto-occipital fasciculus	Association fibers	IDP.2095	AIS	0.3199	0.0958	3.3384	0.0008
ISOVF in the left superior corona radiata	Projection fibers	IDP.2077	SVS	0.5973	0.1788	3.3408	0.0008
MD in the left posterior corona radiata	Projection fibers	IDP.1629	AIS	0.1948	0.0578	3.3685	0.0008
OD in the right sagittal stratum	Association fibers	IDP.2007	AIS	-0.2075	0.0627	-3.311	0.0009
MD in the right superior longitudinal fasciculus	Association fibers	IDP.1642	AS	0.1779	0.0535	3.3262	0.0009
MD in the posterior limb of the left internal capsule	Projection fibers	IDP.1621	AS	0.2093	0.0637	3.2838	0.001
FA in the right inferior cerebellar peduncle	Brainstem tracts	IDP.1462	AS	-0.1809	0.0553	-3.2717	0.0011
Volume of the left fusiform gyrus	Temporal lobe	IDP.0349	AIS	0.2074	0.0642	3.2279	0.0012
ISOVF in the left inferior longitudinal fasciculus	Association fibers	IDP.2114	AIS	0.2249	0.0697	3.2281	0.0012
MO in the right inferior cerebellar peduncle	Brainstem tracts	IDP.1537	AIS	-0.1995	0.0615	-3.2428	0.0012
MD in the left superior longitudinal fasciculus	Association fibers	IDP.1643	AS	0.1735	0.0536	3.2376	0.0012
ISOVF in the right external capsule	Association fibers	IDP.2084	AIS	0.2575	0.0795	3.2376	0.0012
OD in the left inferior cerebellar peduncle	Brainstem tracts	IDP.1988	SVS	0.5684	0.1755	3.239	0.0012
Volume of the white matter hyperintensities	Total brain	IDP.0179	SVS	0.5341	0.1673	3.1924	0.0014
MD in the right posterior corona radiata	Projection fibers	IDP.1628	AIS	0.1853	0.0579	3.201	0.0014
MD in the left anterior corona radiata	Projection fibers	IDP.1625	AIS	0.1671	0.0527	3.1681	0.0015
MD in the left superior thalamic radiation	Projection fibers	IDP.1817	AIS	0.1951	0.0617	3.1626	0.0016
MD in the retrolenticular part of the right internal capsule	Projection fibers	IDP.1622	AS	0.2037	0.0646	3.154	0.0016
FA in the anterior limb of the left internal capsule	Projection fibers	IDP.1469	SVS	-0.5023	0.16	-3.1386	0.0017
MD in the body of corpus callosum	Commissural fibers	IDP.1605	AIS	0.1579	0.0503	3.1383	0.0017
ISOVF in the right anterior corona radiata	Projection fibers	IDP.2074	SVS	0.5625	0.1805	3.117	0.0018
FA in the left inferior cerebellar peduncle	Brainstem tracts	IDP.1463	SVS	-0.5244	0.1686	-3.1103	0.0019
ISOVF in the right posterior corona radiata	Projection fibers	IDP.2078	AIS	0.2353	0.0757	3.1095	0.0019
ISOVF in the right superior fronto-occipital fasciculus	Association fibers	IDP.2094	AIS	0.306	0.0987	3.1013	0.0019
MD in the left inferior fronto-occipital fasciculus	Association fibers	IDP.1806	AIS	0.1711	0.0555	3.0848	0.002
MD in the retrolenticular part of the left internal capsule	Projection fibers	IDP.1623	AIS	0.2027	0.066	3.0699	0.0021
MO in the right inferior cerebellar peduncle	Brainstem tracts	IDP.1537	AS	-0.2088	0.0678	-3.0802	0.0021
MO in the left inferior cerebellar peduncle	Brainstem tracts	IDP.1538	AS	-0.2286	0.0746	-3.0656	0.0022
MD in the left anterior corona radiata	Projection fibers	IDP.1625	SVS	0.487	0.1597	3.0495	0.0023
MD in the left superior fronto-occipital fasciculus	Association fibers	IDP.1645	AIS	0.2163	0.071	3.0466	0.0023
ISOVF in the right anterior thalamic radiation	Projection fibers	IDP.2103	SVS	0.5962	0.1987	3.0003	0.0027
ISOVF in the left anterior thalamic radiation	Projection fibers	IDP.2102	SVS	0.5825	0.194	3.0019	0.0027
ISOVF in the retrolenticular part of the right internal capsule	Projection fibers	IDP.2072	AS	0.2327	0.078	2.9844	0.0028
MD in the right anterior thalamic radiation	Projection fibers	IDP.1797	SVS	0.5323	0.1792	2.9708	0.003
ISOVF in the right inferior longitudinal fasciculus	Association fibers	IDP.2115	AIS	0.1934	0.0652	2.9678	0.003
MD in the right inferior fronto-occipital fasciculus	Association fibers	IDP.1807	AIS	0.1515	0.0511	2.9657	0.003
ISOVF in the forceps minor	Commissural fibers	IDP.2111	AIS	0.2063	0.0698	2.9543	0.0031
ISOVF in the right inferior longitudinal fasciculus	Association fibers	IDP.2115	AS	0.1905	0.0647	2.9434	0.0032
OD in the right inferior cerebellar peduncle	Brainstem tracts	IDP.1987	SVS	0.4605	0.1563	2.9455	0.0032
OD in the right sagittal stratum	Association fibers	IDP.2007	AS	-0.1919	0.0652	-2.9422	0.0033
MD in the anterior limb of the left internal capsule	Projection fibers	IDP.1619	SVS	0.5564	0.1901	2.9272	0.0034
MD in the right anterior corona radiata	Projection fibers	IDP.1624	SVS	0.4474	0.1534	2.9166	0.0035
MD in the right superior corona radiata	Projection fibers	IDP.1626	SVS	0.4669	0.1601	2.9171	0.0035
ISOVF in the retrolenticular part of the right internal capsule	Projection fibers	IDP.2072	AIS	0.2192	0.0751	2.9183	0.0035
MD in the left superior corona radiata	Projection fibers	IDP.1627	SVS	0.4684	0.1611	2.9074	0.0036
FA in the right inferior cerebellar peduncle	Brainstem tracts	IDP.1462	AIS	-0.1548	0.0533	-2.9024	0.0037
ISOVF in the left superior thalamic radiation	Projection fibers	IDP.2123	SVS	0.5325	0.1838	2.8969	0.0038
ISOVF in the left external capsule	Association fibers	IDP.2085	SVS	0.6203	0.2143	2.8949	0.0038
MD in the left anterior thalamic radiation	Projection fibers	IDP.1796	SVS	0.5177	0.1793	2.8866	0.0039
MD in the right inferior longitudinal fasciculus	Association fibers	IDP.1809	AS	0.158	0.0547	2.8889	0.0039
FA in the right anterior corona radiata	Projection fibers	IDP.1474	AS	-0.1585	0.0551	-2.88	0.004
MD in the right anterior corona radiata	Projection fibers	IDP.1624	AIS	0.1442	0.0501	2.8771	0.004
MD in the right sagittal stratum	Association fibers	IDP.1632	AIS	0.1672	0.0582	2.8715	0.0041
ISOVF in the right external capsule	Association fibers	IDP.2084	SVS	0.5636	0.1968	2.8642	0.0042
FA in the left inferior cerebellar peduncle	Brainstem tracts	IDP.1463	AIS	-0.1629	0.0569	-2.8632	0.0042
MD in the posterior limb of the right internal capsule	Projection fibers	IDP.1620	AIS	0.1598	0.056	2.8532	0.0043
MD in the right superior longitudinal fasciculus	Association fibers	IDP.1642	AIS	0.1436	0.0508	2.8242	0.0047
ISOVF in the right anterior thalamic radiation	Projection fibers	IDP.2103	CES	0.2637	0.0932	2.829	0.0047
ISOVF in the retrolenticular part of the left internal capsule	Projection fibers	IDP.2073	SVS	0.6599	0.2337	2.8231	0.0048
MD in the right superior fronto-occipital fasciculus	Association fibers	IDP.1644	AIS	0.1951	0.0692	2.8219	0.0048
MD in the fornix	Commissural fibers	IDP.1606	CES	0.1969	0.0699	2.8188	0.0048
FA in the right inferior cerebellar peduncle	Brainstem tracts	IDP.1462	SVS	-0.4411	0.1564	-2.8199	0.0048
MD in the right superior thalamic radiation	Projection fibers	IDP.1818	AIS	0.176	0.0627	2.8064	0.005
OD in the right medial lemniscus	Brainstem tracts	IDP.1985	SVS	0.5095	0.1834	2.7778	0.0055
ISOVF in the right sagittal stratum	Association fibers	IDP.2082	CES	0.234	0.0849	2.7562	0.0058
MD in the retrolenticular part of the right internal capsule	Projection fibers	IDP.1622	AIS	0.1708	0.062	2.754	0.0059
MD in the left inferior longitudinal fasciculus	Association fibers	IDP.1808	AS	0.162	0.059	2.7474	0.006
Thickness of the left entorhinal cortex	Temporal lobe	IDP.1025	AIS	0.2308	0.0842	2.7405	0.0061
MO in the right sagittal stratum	Association fibers	IDP.1557	AIS	0.1726	0.0632	2.7307	0.0063
Cortical surface area of the left pars opercularis	Frontal lobe	IDP.0665	CES	0.244	0.0906	2.6927	0.0071
MD in the left cingulum cingulate gyrus part	Limbic system fibers	IDP.1637	AS	0.1705	0.0633	2.6925	0.0071
FA in the left superior corona radiata	Projection fibers	IDP.1477	AS	-0.1617	0.0601	-2.6899	0.0071
MD in the left superior longitudinal fasciculus	Association fibers	IDP.1643	AIS	0.1354	0.0506	2.6736	0.0075
MD in the retrolenticular part of the left internal capsule	Projection fibers	IDP.1623	SVS	0.5053	0.1901	2.6583	0.0079
FA in the left posterior thalamic radiation	Projection fibers	IDP.1481	AS	-0.1661	0.0626	-2.6525	0.008
Volume of the right caudate	Subcortical region	IDP.0014	AS	0.1494	0.0563	2.6536	0.008
ISOVF in the right superior thalamic radiation	Projection fibers	IDP.2124	SVS	0.462	0.1752	2.6371	0.0084
Thickness of the left lateral occipital cortex	Occipital lobe	IDP.1030	AIS	0.1672	0.0634	2.6358	0.0084
OD in the left posterior corona radiata	Projection fibers	IDP.2004	AS	-0.1836	0.0699	-2.6269	0.0086
MD in the left sagittal stratum	Association fibers	IDP.1633	AS	0.1688	0.0643	2.6258	0.0086
MD in the left superior thalamic radiation	Projection fibers	IDP.1817	SVS	0.4686	0.1785	2.6253	0.0087
MD in the body of corpus callosum	Commissural fibers	IDP.1605	CES	0.1726	0.0659	2.6212	0.0088
FA in the left anterior thalamic radiation	Projection fibers	IDP.1502	AS	-0.1468	0.0562	-2.6133	0.009
ICVF in the left posterior corona radiata	Projection fibers	IDP.1929	AS	-0.1418	0.0543	-2.612	0.009
MO in the anterior limb of the right internal capsule	Projection fibers	IDP.1543	AS	-0.1421	0.0546	-2.6013	0.0093
MD in the body of corpus callosum	Commissural fibers	IDP.1605	SVS	0.4006	0.1544	2.5948	0.0095
MO in the right cingulum cingulate gyrus part	Limbic system fibers	IDP.1561	AS	0.1646	0.0635	2.5913	0.0096
MO in the right cingulum cingulate gyrus part	Limbic system fibers	IDP.1561	AIS	0.1665	0.0643	2.5908	0.0096
ICVF in the right posterior corona radiata	Projection fibers	IDP.1928	CES	-0.1824	0.0704	-2.5902	0.0096
MD in the left external capsule	Association fibers	IDP.1635	SVS	0.4847	0.1873	2.5874	0.0097
ISOVF in the left cerebral peduncle	Brainstem tracts	IDP.2067	AIS	0.3177	0.1232	2.5784	0.0099
MD in the posterior limb of the left internal capsule	Projection fibers	IDP.1621	AIS	0.1543	0.06	2.5718	0.0101
MD in the left inferior fronto-occipital fasciculus	Association fibers	IDP.1806	SVS	0.4081	0.1588	2.5693	0.0102
MD in the genu of corpus callosum	Commissural fibers	IDP.1604	AS	0.1278	0.0499	2.5606	0.0104
ICVF in the right posterior corona radiata	Projection fibers	IDP.1928	AS	-0.1362	0.0532	-2.5625	0.0104
ISOVF in the anterior limb of the right internal capsule	Projection fibers	IDP.2068	CES	0.2572	0.1004	2.5622	0.0104
MD in the left inferior longitudinal fasciculus	Association fibers	IDP.1808	SVS	0.4019	0.1571	2.5585	0.0105
MD in the right sagittal stratum	Association fibers	IDP.1632	SVS	0.446	0.1746	2.5536	0.0107
ISOVF in the posterior limb of the right internal capsule	Projection fibers	IDP.2070	SVS	0.7002	0.2747	2.5493	0.0108
MD in the fornix	Commissural fibers	IDP.1606	AS	0.1426	0.0562	2.538	0.0111
ICVF in the right tapetum	Commissural fibers	IDP.1948	SVS	-0.3511	0.1382	-2.5396	0.0111
FA in the right posterior thalamic radiation	Projection fibers	IDP.1480	AS	-0.1572	0.0619	-2.5385	0.0111
MD in the right posterior thalamic radiation	Projection fibers	IDP.1630	SVS	0.4	0.1578	2.5356	0.0112
MD in the left posterior thalamic radiation	Projection fibers	IDP.1631	SVS	0.4048	0.1595	2.5377	0.0112
MD in the fornix	Commissural fibers	IDP.1606	AIS	0.1403	0.0554	2.5335	0.0113
Thickness of the left entorhinal cortex	Temporal lobe	IDP.1025	AS	0.2163	0.0853	2.5345	0.0113
ISOVF in the left acoustic radiation	Projection fibers	IDP.2100	AIS	0.2257	0.0893	2.5261	0.0115
Thickness of the left fusiform gyrus	Temporal lobe	IDP.1026	AIS	0.1919	0.0761	2.523	0.0116
FA in the right superior corona radiata	Projection fibers	IDP.1476	AS	-0.1488	0.0591	-2.5174	0.0118
MD in the forceps minor	Commissural fibers	IDP.1805	SVS	0.3953	0.157	2.5186	0.0118
ISOVF in the right cerebral peduncle	Brainstem tracts	IDP.2066	AS	0.3277	0.1305	2.5104	0.0121
MD in the posterior limb of the right internal capsule	Projection fibers	IDP.1620	SVS	0.4183	0.167	2.5055	0.0122
FA in the right anterior thalamic radiation	Projection fibers	IDP.1503	AS	-0.1438	0.0574	-2.5041	0.0123
Volume of the right pars orbitalis	Frontal lobe	IDP.0394	AIS	0.1819	0.0727	2.5024	0.0123
MD in the right external capsule	Association fibers	IDP.1634	SVS	0.4102	0.1638	2.5039	0.0123
ISOVF in the right cerebral peduncle	Brainstem tracts	IDP.2066	AIS	0.3063	0.1227	2.4967	0.0125
ICVF in the left posterior corona radiata	Projection fibers	IDP.1929	CES	-0.171	0.0686	-2.4942	0.0126
OD in the right anterior thalamic radiation	Projection fibers	IDP.2028	AIS	-0.1556	0.0627	-2.4813	0.0131
MD in the right inferior longitudinal fasciculus	Association fibers	IDP.1809	AIS	0.134	0.0541	2.4769	0.0133
FA in the right anterior thalamic radiation	Projection fibers	IDP.1503	SVS	-0.3502	0.1416	-2.473	0.0134
MO in the left sagittal stratum	Association fibers	IDP.1558	AIS	0.1693	0.0688	2.4615	0.0138
ISOVF in the right medial lemniscus	Brainstem tracts	IDP.2060	AIS	0.2343	0.0952	2.4627	0.0138
FA in the anterior limb of the left internal capsule	Projection fibers	IDP.1469	AIS	-0.1373	0.0557	-2.4635	0.0138
ISOVF in the left acoustic radiation	Projection fibers	IDP.2100	AS	0.2309	0.0939	2.4576	0.014
FA in the left anterior thalamic radiation	Projection fibers	IDP.1502	SVS	-0.3553	0.1449	-2.4525	0.0142
MO in the left inferior cerebellar peduncle	Brainstem tracts	IDP.1538	SVS	-0.4354	0.1787	-2.4363	0.0148
ISOVF in the left superior longitudinal fasciculus	Association fibers	IDP.2093	SVS	0.4136	0.1697	2.4376	0.0148
ISOVF in the right cingulum cingulate gyrus part	Limbic system fibers	IDP.2086	AS	0.1576	0.0647	2.4369	0.0148
Volume of the right caudate	Subcortical region	IDP.0014	SVS	0.3205	0.1319	2.4307	0.0151
MD in the right superior longitudinal fasciculus	Association fibers	IDP.1642	SVS	0.3535	0.1456	2.427	0.0152
FA in the right posterior thalamic radiation	Projection fibers	IDP.1480	SVS	-0.3924	0.1617	-2.4262	0.0153
OD in the right cerebral peduncle	Brainstem tracts	IDP.1991	SVS	0.3231	0.1337	2.4156	0.0157
FA in the forceps minor	Commissural fibers	IDP.1511	SVS	-0.321	0.133	-2.4134	0.0158
FA in the left superior thalamic radiation	Projection fibers	IDP.1523	AS	-0.1541	0.0639	-2.4114	0.0159
ISOVF in the body of corpus callosum	Commissural fibers	IDP.2055	SVS	0.3806	0.1578	2.4119	0.0159
ISOVF in the right medial lemniscus	Brainstem tracts	IDP.2060	AS	0.2304	0.0957	2.4068	0.0161
OD in the left medial lemniscus	Brainstem tracts	IDP.1986	SVS	0.4192	0.1744	2.4033	0.0162
ISOVF in the posterior limb of the left internal capsule	Projection fibers	IDP.2071	SVS	0.6724	0.2799	2.4028	0.0163
Thickness of the left caudal anterior-cingulate cortex	Limbic system	IDP.1022	CES	-0.3001	0.125	-2.4007	0.0164
MD in the right tapetum	Commissural fibers	IDP.1648	AIS	0.1508	0.0631	2.3906	0.0168
MD in the forceps minor	Commissural fibers	IDP.1805	AIS	0.1331	0.0558	2.3872	0.017
MD in the right inferior longitudinal fasciculus	Association fibers	IDP.1809	SVS	0.3602	0.1514	2.3795	0.0173
MD in the left superior corona radiata	Projection fibers	IDP.1627	CES	0.174	0.0731	2.3805	0.0173
Volume of the left hippocampus	Subcortical region	IDP.0019	SVS	0.44	0.1851	2.3771	0.0174
ISOVF in the right acoustic radiation	Projection fibers	IDP.2101	AIS	0.1987	0.0837	2.3729	0.0176
MD in the left cingulum cingulate gyrus part	Limbic system fibers	IDP.1637	SVS	0.4069	0.1714	2.374	0.0176
ISOVF in the anterior limb of the left internal capsule	Projection fibers	IDP.2069	CES	0.2441	0.103	2.3707	0.0178
FA in the right medial lemniscus	Brainstem tracts	IDP.1460	AS	-0.1406	0.0593	-2.3691	0.0178
ISOVF in the left anterior thalamic radiation	Projection fibers	IDP.2102	CES	0.2227	0.0941	2.3672	0.0179
ISOVF in the left cerebral peduncle	Brainstem tracts	IDP.2067	CES	0.376	0.1592	2.3623	0.0182
OD in the retrolenticular part of the left internal capsule	Projection fibers	IDP.1998	AIS	-0.1445	0.0612	-2.3602	0.0183
FA in the left posterior corona radiata	Projection fibers	IDP.1479	AS	-0.143	0.0608	-2.352	0.0187
FA in the right cerebral peduncle	Brainstem tracts	IDP.1466	SVS	-0.3745	0.1593	-2.351	0.0187
ISOVF in the body of corpus callosum	Commissural fibers	IDP.2055	CES	0.163	0.0695	2.3469	0.0189
MD in the right inferior fronto-occipital fasciculus	Association fibers	IDP.1807	SVS	0.3572	0.1523	2.3455	0.019
Volume of the right hippocampus	Subcortical region	IDP.0020	CES	-0.2009	0.0859	-2.3388	0.0193
Cortical surface area of the right postcentral gyrus	Parietal lobe	IDP.0703	SVS	-0.3644	0.1558	-2.3385	0.0194
MD in the right superior fronto-occipital fasciculus	Association fibers	IDP.1644	SVS	0.435	0.1863	2.335	0.0195
MD in the right posterior corona radiata	Projection fibers	IDP.1628	SVS	0.3493	0.1495	2.3359	0.0195
MO in the left cingulum cingulate gyrus part	Limbic system fibers	IDP.1562	AIS	0.1542	0.0662	2.328	0.0199
MD in the right superior thalamic radiation	Projection fibers	IDP.1818	SVS	0.3886	0.1669	2.3281	0.0199
ISOVF in the right superior longitudinal fasciculus	Association fibers	IDP.2092	SVS	0.3591	0.1545	2.325	0.0201
MD in the right posterior corona radiata	Projection fibers	IDP.1628	CES	0.1794	0.0774	2.3181	0.0204
OD in the right anterior thalamic radiation	Projection fibers	IDP.2028	AS	-0.1565	0.0676	-2.3162	0.0205
ISOVF in the left cerebral peduncle	Brainstem tracts	IDP.2067	AS	0.2956	0.1276	2.3175	0.0205
OD in the left sagittal stratum	Association fibers	IDP.2008	AIS	-0.1633	0.0706	-2.3139	0.0207
MD in the left superior fronto-occipital fasciculus	Association fibers	IDP.1645	SVS	0.4141	0.1792	2.3104	0.0209
MD in the retrolenticular part of the right internal capsule	Projection fibers	IDP.1622	SVS	0.352	0.1525	2.3075	0.021
MD in the left superior longitudinal fasciculus	Association fibers	IDP.1643	SVS	0.3373	0.1461	2.3087	0.021
MD in the left posterior corona radiata	Projection fibers	IDP.1629	SVS	0.3592	0.1557	2.3063	0.0211
FA in the right medial lemniscus	Brainstem tracts	IDP.1460	SVS	-0.3763	0.1634	-2.3023	0.0213
ISOVF in the right acoustic radiation	Projection fibers	IDP.2101	AS	0.2107	0.0917	2.2984	0.0215
MD in the left inferior longitudinal fasciculus	Association fibers	IDP.1808	AIS	0.1311	0.0571	2.2952	0.0217
MD in the right tapetum	Commissural fibers	IDP.1648	AS	0.1535	0.0669	2.2949	0.0217
MD in the left sagittal stratum	Association fibers	IDP.1633	SVS	0.3974	0.1731	2.2956	0.0217
ISOVF in the fornix	Commissural fibers	IDP.2056	CES	0.2688	0.1173	2.2922	0.0219
Cortical surface area of the right middle temporal gyrus	Temporal lobe	IDP.0696	CES	0.1847	0.0806	2.2907	0.022
ICVF in the right tapetum	Commissural fibers	IDP.1948	AS	-0.1254	0.0549	-2.2815	0.0225
FA in the left cingulum hippocampus	Limbic system fibers	IDP.1489	AIS	0.1246	0.0549	2.2682	0.0233
Cortical surface area of the right parahippocampal gyrus	Limbic system	IDP.0697	CES	0.24	0.1059	2.2672	0.0234
Volume of the right hippocampus	Subcortical region	IDP.0020	SVS	0.4361	0.1924	2.2669	0.0234
FA in the genu of corpus callosum	Commissural fibers	IDP.1454	SVS	-0.3388	0.1497	-2.2626	0.0237
MD in the left posterior corona radiata	Projection fibers	IDP.1629	CES	0.169	0.075	2.2545	0.0242
FA in the right cingulum hippocampus	Limbic system fibers	IDP.1488	AIS	0.1106	0.0491	2.2527	0.0243
FA in the right anterior corona radiata	Projection fibers	IDP.1474	SVS	-0.3064	0.1363	-2.2487	0.0245
ISOVF in the right cingulum cingulate gyrus part	Limbic system fibers	IDP.2086	AIS	0.1481	0.0658	2.2498	0.0245
ISOVF in the left cingulum cingulate gyrus part	Limbic system fibers	IDP.2087	AS	0.1618	0.072	2.248	0.0246
Cortical surface area of the left supramarginal gyrus	Parietal lobe	IDP.0678	SVS	-0.3593	0.1599	-2.2467	0.0247
MD in the left cingulum cingulate gyrus part	Limbic system fibers	IDP.1637	AIS	0.1352	0.0604	2.2393	0.0251
ICVF in the left superior corona radiata	Projection fibers	IDP.1927	AS	-0.1199	0.0536	-2.239	0.0252
ISOVF in the right posterior thalamic radiation	Projection fibers	IDP.2080	CES	0.2168	0.0971	2.2319	0.0256
Cortical surface area of the left fusiform gyrus	Temporal lobe	IDP.0654	CES	0.1952	0.0874	2.2328	0.0256
FA in the left posterior thalamic radiation	Projection fibers	IDP.1481	SVS	-0.3437	0.1544	-2.226	0.026
Thickness of the right precentral gyrus	Parietal lobe	IDP.1077	CES	-0.1869	0.0839	-2.2262	0.026
FA in the right cerebral peduncle	Brainstem tracts	IDP.1466	AS	-0.133	0.0599	-2.2214	0.0263
MD in the left sagittal stratum	Association fibers	IDP.1633	AIS	0.1389	0.0625	2.221	0.0264
OD in the right posterior corona radiata	Projection fibers	IDP.2003	AS	-0.1479	0.067	-2.2093	0.0272
FA in the left cerebral peduncle	Brainstem tracts	IDP.1467	SVS	-0.3321	0.1504	-2.2074	0.0273
ISOVF in the left cingulum cingulate gyrus part	Limbic system fibers	IDP.2087	AIS	0.1573	0.0713	2.2052	0.0274
Volume of the left amygdala	Subcortical region	IDP.0021	AS	-0.1719	0.0779	-2.2057	0.0274
ISOVF in the right cerebral peduncle	Brainstem tracts	IDP.2066	CES	0.357	0.1619	2.2047	0.0275
ISOVF in the right superior corona radiata	Projection fibers	IDP.2076	CES	0.213	0.0966	2.2048	0.0275
ICVF in the left posterior thalamic radiation	Projection fibers	IDP.1931	SVS	-0.3088	0.1404	-2.1998	0.0278
MD in the right anterior thalamic radiation	Projection fibers	IDP.1797	CES	0.1741	0.0791	2.2008	0.0278
ISOVF in the left inferior fronto-occipital fasciculus	Association fibers	IDP.2112	SVS	0.3465	0.1575	2.1999	0.0278
FA in the right external capsule	Association fibers	IDP.1484	AS	-0.1215	0.0553	-2.1953	0.0281
ISOVF in the posterior limb of the left internal capsule	Projection fibers	IDP.2071	CES	0.2938	0.1343	2.1877	0.0287
FA in the right superior fronto-occipital fasciculus	Association fibers	IDP.1494	SVS	-0.3111	0.1423	-2.1856	0.0288
Volume of the left fusiform gyrus	Temporal lobe	IDP.0349	CES	0.1956	0.0896	2.1835	0.029
MO in the left cingulum cingulate gyrus part	Limbic system fibers	IDP.1562	SVS	0.3729	0.1708	2.1835	0.029
MO in the right sagittal stratum	Association fibers	IDP.1557	AS	0.143	0.0655	2.1832	0.029
ISOVF in the forceps major	Commissural fibers	IDP.2110	AIS	0.133	0.0609	2.182	0.0291
FA in the right cingulum hippocampus	Limbic system fibers	IDP.1488	AS	0.1135	0.052	2.1811	0.0292
ISOVF in the fornix	Commissural fibers	IDP.2056	AIS	0.2263	0.1039	2.1784	0.0294
ISOVF in the right superior fronto-occipital fasciculus	Association fibers	IDP.2094	SVS	0.5087	0.2335	2.1786	0.0294
FA in the left posterior corona radiata	Projection fibers	IDP.1479	CES	-0.187	0.0858	-2.1782	0.0294
MD in the left acoustic radiation	Projection fibers	IDP.1794	AS	0.1725	0.0795	2.1702	0.03
MO in the right superior cerebellar peduncle	Brainstem tracts	IDP.1539	SVS	-0.4237	0.1954	-2.1686	0.0301
Thickness of the right lateral occipital cortex	Occipital lobe	IDP.1064	CES	-0.1776	0.082	-2.1662	0.0303
OD in the left inferior fronto-occipital fasciculus	Association fibers	IDP.2037	CES	-0.1914	0.0884	-2.1662	0.0303
FA in the posterior limb of the right internal capsule	Projection fibers	IDP.1470	AS	-0.1383	0.064	-2.1611	0.0307
ICVF in the genu of corpus callosum	Commissural fibers	IDP.1904	SVS	-0.2789	0.1291	-2.1614	0.0307
MD in the left cerebral peduncle	Brainstem tracts	IDP.1617	AIS	0.1509	0.0699	2.1595	0.0308
FA in the right inferior longitudinal fasciculus	Association fibers	IDP.1515	AS	-0.1191	0.0553	-2.1544	0.0312
ICVF in the right posterior thalamic radiation	Projection fibers	IDP.1930	SVS	-0.2941	0.1367	-2.1525	0.0314
MD in the fornix	Commissural fibers	IDP.1606	SVS	0.3584	0.1666	2.1513	0.0315
OD in the left cerebral peduncle	Brainstem tracts	IDP.1992	SVS	0.2424	0.1128	2.1492	0.0316
Cortical surface area of the left pars orbitalis	Frontal lobe	IDP.0666	CES	0.2082	0.0972	2.1421	0.0322
Volume of the left caudate	Subcortical region	IDP.0013	SVS	0.2394	0.1119	2.1394	0.0324
ISOVF in the right corticospinal tract	Brainstem tracts	IDP.2058	AS	0.1659	0.0777	2.1365	0.0326
Cortical surface area of the right lateral orbital frontal cortex	Frontal lobe	IDP.0693	CES	0.1886	0.0883	2.1356	0.0327
ICVF in the left posterior thalamic radiation	Projection fibers	IDP.1931	AS	-0.1173	0.0549	-2.136	0.0327
Cortical surface area of the right inferior parietal cortex	Parietal lobe	IDP.0689	CES	0.1761	0.0825	2.1352	0.0327
MO in the anterior limb of the right internal capsule	Projection fibers	IDP.1543	AIS	-0.1109	0.052	-2.1334	0.0329
MD in the right anterior corona radiata	Projection fibers	IDP.1624	CES	0.1459	0.0684	2.132	0.033
FA in the right tapetum	Commissural fibers	IDP.1498	SVS	-0.2834	0.1332	-2.1283	0.0333
ICVF in the right tapetum	Commissural fibers	IDP.1948	AIS	-0.1191	0.056	-2.1269	0.0334
Volume of the left fusiform gyrus	Temporal lobe	IDP.0349	AS	0.141	0.0664	2.1226	0.0338
MD in the right cerebral peduncle	Brainstem tracts	IDP.1616	CES	0.2148	0.1014	2.1198	0.034
OD in the right posterior corona radiata	Projection fibers	IDP.2003	AIS	-0.1402	0.0662	-2.1182	0.0342
OD in the left cingulum hippocampus	Limbic system fibers	IDP.2014	AIS	-0.1316	0.0624	-2.1108	0.0348
FA in the left superior corona radiata	Projection fibers	IDP.1477	AIS	-0.1203	0.0571	-2.1044	0.0353
FA in the posterior limb of the left internal capsule	Projection fibers	IDP.1471	AS	-0.1335	0.0635	-2.1025	0.0355
MD in the right superior corona radiata	Projection fibers	IDP.1626	CES	0.1544	0.0734	2.102	0.0356
MD in the right acoustic radiation	Projection fibers	IDP.1795	AS	0.1729	0.0823	2.0992	0.0358
Cortical surface area of the left precentral gyrus	Parietal lobe	IDP.0671	AS	-0.1233	0.0589	-2.092	0.0364
FA in the left posterior thalamic radiation	Projection fibers	IDP.1481	AIS	-0.131	0.0627	-2.0907	0.0366
MD in the right cingulum cingulate gyrus part	Limbic system fibers	IDP.1636	AS	0.13	0.0622	2.0886	0.0367
Cortical surface area of the left banks superior temporal sulcus	Temporal lobe	IDP.0649	SVS	-0.3391	0.1625	-2.0863	0.037
Thickness of the left fusiform gyrus	Temporal lobe	IDP.1026	AS	0.1605	0.0771	2.0821	0.0373
Cortical surface area of the left entorhinal cortex	Temporal lobe	IDP.0653	SVS	0.3402	0.1637	2.079	0.0376
ISOVF in the right inferior cerebellar peduncle	Brainstem tracts	IDP.2062	SVS	0.5558	0.2674	2.0781	0.0377
Thickness of the right lingual gyrus	Temporal lobe	IDP.1066	CES	-0.1805	0.0869	-2.0771	0.0378
ICVF in the left superior corona radiata	Projection fibers	IDP.1927	SVS	-0.2906	0.1399	-2.0764	0.0379
OD in the right external capsule	Association fibers	IDP.2009	AIS	-0.1215	0.0586	-2.0735	0.0381
ICVF in the right superior corona radiata	Projection fibers	IDP.1926	SVS	-0.2763	0.1334	-2.0713	0.0383
ISOVF in the genu of corpus callosum	Commissural fibers	IDP.2054	AS	0.1318	0.0636	2.0708	0.0384
FA in the forceps minor	Commissural fibers	IDP.1511	AS	-0.1112	0.0539	-2.0622	0.0392
Thickness of the left rostral anterior cingulate cortex	Limbic system	IDP.1045	AS	-0.1648	0.0799	-2.0614	0.0393
Volume of the right precentral gyrus	Parietal lobe	IDP.0399	SVS	-0.323	0.1567	-2.0606	0.0393
OD in the right external capsule	Association fibers	IDP.2009	AS	-0.1259	0.0612	-2.059	0.0395
ISOVF in the left corticospinal tract	Brainstem tracts	IDP.2059	CES	0.2185	0.1062	2.058	0.0396
OD in the left posterior corona radiata	Projection fibers	IDP.2004	AIS	-0.1491	0.0725	-2.0569	0.0397
ICVF in the left tapetum	Commissural fibers	IDP.1949	SVS	-0.3029	0.1473	-2.0571	0.0397
FA in the left medial lemniscus	Brainstem tracts	IDP.1461	SVS	-0.3328	0.1619	-2.0553	0.0398
FA in the body of corpus callosum	Commissural fibers	IDP.1455	SVS	-0.2992	0.1457	-2.054	0.04
FA in the right tapetum	Commissural fibers	IDP.1498	AS	-0.1151	0.0561	-2.0516	0.0402
FA in the left superior thalamic radiation	Projection fibers	IDP.1523	AIS	-0.1296	0.0631	-2.0517	0.0402
ICVF in the right posterior thalamic radiation	Projection fibers	IDP.1930	AS	-0.1093	0.0533	-2.0493	0.0404
OD in the right cerebral peduncle	Brainstem tracts	IDP.1991	AS	0.1221	0.0596	2.0487	0.0405
MO in the left cingulum cingulate gyrus part	Limbic system fibers	IDP.1562	AS	0.1398	0.0683	2.0468	0.0407
ICVF in the left superior corona radiata	Projection fibers	IDP.1927	CES	-0.1353	0.0661	-2.0455	0.0408
ICVF in the left superior fronto-occipital fasciculus	Association fibers	IDP.1945	AS	-0.1243	0.0608	-2.0445	0.0409
FA in the left inferior longitudinal fasciculus	Association fibers	IDP.1514	SVS	-0.3171	0.1552	-2.0435	0.041
ISOVF in the left inferior cerebellar peduncle	Brainstem tracts	IDP.2063	AS	0.2338	0.1145	2.0419	0.0412
ICVF in the right superior corona radiata	Projection fibers	IDP.1926	AS	-0.1078	0.0528	-2.0415	0.0412
ICVF in the left tapetum	Commissural fibers	IDP.1949	AS	-0.1212	0.0594	-2.04	0.0414
Volume of the right caudate	Subcortical region	IDP.0014	AIS	0.1107	0.0544	2.0362	0.0417
MD in the genu of corpus callosum	Commissural fibers	IDP.1604	SVS	0.2861	0.1408	2.0319	0.0422
FA in the right superior fronto-occipital fasciculus	Association fibers	IDP.1494	AS	-0.1226	0.0604	-2.0297	0.0424
Thickness of the left posterior-cingulate cortex	Limbic system	IDP.1042	CES	-0.2049	0.1013	-2.0233	0.043
ICVF in the left superior fronto-occipital fasciculus	Association fibers	IDP.1945	SVS	-0.2895	0.1431	-2.0222	0.0432
Volume of the right pars orbitalis	Frontal lobe	IDP.0394	AS	0.1459	0.0722	2.0214	0.0432
FA in the left anterior corona radiata	Projection fibers	IDP.1475	SVS	-0.2748	0.136	-2.0204	0.0433
Volume of the right lateral orbital frontal cortex	Frontal lobe	IDP.0387	AIS	0.1285	0.0637	2.0185	0.0435
MD in the left acoustic radiation	Projection fibers	IDP.1794	AIS	0.152	0.0756	2.0118	0.0442
Cortical surface area of the right banks superior temporal sulcus	Temporal lobe	IDP.0683	CES	0.183	0.091	2.0105	0.0444
Thickness of the left precuneus cortex	Parietal lobe	IDP.1044	AIS	0.1326	0.0661	2.0061	0.0448
MD in the left tapetum	Commissural fibers	IDP.1649	SVS	0.3209	0.16	2.0056	0.0449
Cortical surface area of the left precentral gyrus	Parietal lobe	IDP.0671	AIS	-0.1144	0.0571	-2.0042	0.045
ISOVF in the left posterior corona radiata	Projection fibers	IDP.2079	SVS	0.3062	0.1528	2.0038	0.0451
ISOVF in the fornix	Commissural fibers	IDP.2056	AS	0.2162	0.1079	2.0039	0.0451
MD in the left anterior thalamic radiation	Projection fibers	IDP.1796	CES	0.1598	0.0798	2.0028	0.0452
Thickness of the left banks superior temporal sulcus	Temporal lobe	IDP.1021	AIS	0.1715	0.0857	2.0017	0.0453
ICVF in the right anterior corona radiata	Projection fibers	IDP.1924	SVS	-0.2647	0.1323	-2.0014	0.0453
FA in the left inferior fronto-occipital fasciculus	Association fibers	IDP.1512	SVS	-0.3013	0.1507	-1.9994	0.0456
Cortical surface area of the left superior parietal gyrus	Parietal lobe	IDP.0676	SVS	-0.3166	0.1585	-1.9971	0.0458
ICVF in the right posterior corona radiata	Projection fibers	IDP.1928	AIS	-0.1057	0.0529	-1.9973	0.0458
MO in the right fornix and stria terminalis	Association fibers	IDP.1565	SVS	0.3335	0.1671	1.996	0.0459
ISOVF in the retrolenticular part of the right internal capsule	Projection fibers	IDP.2072	SVS	0.3326	0.1668	1.9934	0.0462
Cortical surface area of the right lateral orbital frontal cortex	Frontal lobe	IDP.0693	AS	0.1319	0.0662	1.9917	0.0464
FA in the right inferior longitudinal fasciculus	Association fibers	IDP.1515	SVS	-0.2898	0.1456	-1.9903	0.0466
ISOVF in the left inferior cerebellar peduncle	Brainstem tracts	IDP.2063	AIS	0.2218	0.1114	1.9902	0.0466
FA in the left external capsule	Association fibers	IDP.1485	AS	-0.1162	0.0584	-1.9892	0.0467
Volume of the left supramarginal gyrus	Parietal lobe	IDP.0373	SVS	-0.3289	0.1654	-1.9888	0.0467
ISOVF in the middle cerebellar peduncle	Brainstem tracts	IDP.2052	AS	0.1449	0.0731	1.9832	0.0473
FA in the right anterior corona radiata	Projection fibers	IDP.1474	AIS	-0.1095	0.0552	-1.9833	0.0473
FA in the posterior limb of the right internal capsule	Projection fibers	IDP.1470	SVS	-0.3102	0.1566	-1.9815	0.0475
FA in the right tapetum	Commissural fibers	IDP.1498	AIS	-0.1097	0.0554	-1.9814	0.0475
ICVF in the left anterior corona radiata	Projection fibers	IDP.1925	SVS	-0.2636	0.1331	-1.9799	0.0477
Volume of the left postcentral gyrus	Parietal lobe	IDP.0364	SVS	-0.3219	0.1627	-1.9783	0.0479
MO in the right cingulum cingulate gyrus part	Limbic system fibers	IDP.1561	SVS	0.3015	0.1527	1.9742	0.0484
ICVF in the left sagittal stratum	Association fibers	IDP.1933	SVS	-0.286	0.145	-1.9724	0.0486
MD in the right tapetum	Commissural fibers	IDP.1648	SVS	0.3077	0.1563	1.9691	0.0489
MD in the left cerebral peduncle	Brainstem tracts	IDP.1617	AS	0.1496	0.076	1.9686	0.049
FA in the left posterior corona radiata	Projection fibers	IDP.1479	SVS	-0.291	0.148	-1.9657	0.0493
ISOVF in the left inferior longitudinal fasciculus	Association fibers	IDP.2114	SVS	0.3134	0.1595	1.9649	0.0494
Volume of the left pars opercularis	Frontal lobe	IDP.0360	CES	0.1972	0.1004	1.9644	0.0495
MO in the left cerebral peduncle	Brainstem tracts	IDP.1542	SVS	-0.2554	0.1301	-1.9624	0.0497

## Sheet: Table S3
Table S3: Outliers detected by RadialMR in forward MR
IDP	stroke	SNP
IDP.1634	AS	rs11191829,rs12524544,rs2303865,rs4556147,rs7197215,rs7728421,rs9943229
IDP.1634	AIS	rs11191829,rs12524544,rs2303865,rs4556147,rs7197215,rs7728421
IDP.1634	SVS	rs12524544,rs13164785,rs140244541,rs2303865,rs4556147,rs7197215
IDP.1643	AS	rs12403837,rs430114,rs4894803,rs5745850
IDP.1643	AIS	rs2365715,rs5745850
IDP.1643	SVS	rs11191770,rs113322852
IDP.1494	SVS	rs10174652,rs150434736
IDP.1494	AS	rs10037418,rs10174652,rs150434736
IDP.1606	CES	rs67827860
IDP.1606	AS	rs613312
IDP.1606	AIS	rs613312,rs6469870
IDP.1606	SVS	rs6469870
IDP.1481	AS	rs11068773
IDP.1481	AIS	rs11068773,rs174534
IDP.2124	AS	rs10883908,rs17460016,rs192238573,rs2873195,rs9296310
IDP.2124	AIS	rs10883908,rs17460016,rs192238573,rs2873195,rs9296310
IDP.2124	SVS	rs10883908,rs192238573,rs2873195,rs9296310
IDP.1630	AS	rs342940,rs9739560
IDP.1630	AIS	rs342940,rs9739560
IDP.1630	SVS	rs11191770,rs12699998
IDP.0676	SVS	rs59649036
IDP.2081	AS	rs2276864,rs4457054
IDP.2081	AIS	rs2276864,rs4457054,rs7576060
IDP.1991	SVS	rs62474683,rs9467571
IDP.1991	AS	rs9467571
IDP.1542	SVS	rs62474683,rs7213347
IDP.1468	AS	rs7025953,rs8179282
IDP.1468	AIS	rs7025953
IDP.1468	SVS	rs113896715,rs2863994,rs56362600,rs7025953,rs80087860,rs8179282
IDP.2058	AS	rs1506871
IDP.1623	AS	rs11191829,rs5745850,rs76122535
IDP.1623	AIS	rs11191829,rs5745850,rs76122535
IDP.1623	SVS	rs11191829,rs76122535
IDP.1511	SVS	rs113322852,rs199498
IDP.1511	AS	rs10757268,rs2365715
IDP.1502	AS	rs7590302
IDP.1502	SVS	rs199526,rs760975,rs76122535
IDP.1461	SVS	rs76122535
IDP.1648	AS	rs76289965
IDP.1648	SVS	rs146550622
IDP.2009	AIS	rs2214555
IDP.2009	AS	rs2214555
IDP.0689	CES	rs6064010
IDP.1807	AS	rs4894803
IDP.1807	SVS	rs11191770,rs148269941,rs199498,rs6461387
IDP.1930	SVS	rs111905143,rs7150622
IDP.1930	AS	rs9739560
IDP.1928	CES	rs7216587,rs9739560
IDP.1928	AS	rs2978101,rs8141150,rs9739560
IDP.1928	AIS	rs8141150
IDP.0678	SVS	rs113173628
IDP.1645	AS	rs12928520,rs2475216
IDP.1645	AIS	rs2475216
IDP.1645	SVS	rs76122535,rs7733216
IDP.1635	AS	rs11191829,rs1609829,rs7196814,rs7451833,rs8179283
IDP.1635	AIS	rs11191829,rs1609829,rs7196814,rs7451833,rs76122535
IDP.1635	SVS	rs11191770,rs6006989,rs67827860,rs7216587,rs7451833,rs76122535
IDP.2092	AS	rs17460016,rs35176054,rs74597754,rs9739560
IDP.2092	AIS	rs17460016,rs4790881,rs74597754
IDP.2092	SVS	rs74597754
IDP.1992	SVS	rs115380202
IDP.1454	SVS	rs111535660,rs199498,rs2151280,rs2365715,rs72807596,rs76122535
IDP.2103	AS	rs1948948,rs2475214
IDP.2103	AIS	rs1948948,rs2475214
IDP.2103	SVS	rs2475214,rs34421054
IDP.2103	CES	rs17205972,rs2475214
IDP.1480	AS	rs11068773
IDP.1480	SVS	rs225727
IDP.0387	AIS	rs10107636,rs11012730,rs2045258
IDP.0666	CES	rs2170404
IDP.0394	AIS	rs10050688
IDP.2075	AS	rs12192990,rs7708285,rs9739560
IDP.2075	AIS	rs12192990,rs7708285
IDP.0179	AS	rs115400054,rs55983834,rs8072587,rs936393
IDP.0179	AIS	rs115400054,rs17576323,rs55983834,rs8072587,rs936393
IDP.0179	SVS	rs115400054,rs2863994,rs55983834,rs6504266,rs7492460
IDP.2086	AS	rs2978115
IDP.2086	AIS	rs2978115
IDP.1624	AS	rs11191835,rs2365715
IDP.1624	SVS	rs199498,rs2365715,rs62324288
IDP.1624	AIS	rs2365715
IDP.1624	CES	rs2047071,rs9487744
IDP.1466	SVS	rs4377898
IDP.1466	AS	rs599452
IDP.1479	AS	rs11068773,rs115008867,rs61000833
IDP.1479	CES	rs115008867
IDP.1479	SVS	rs115008867,rs61000833
IDP.2093	AS	rs35176054,rs9739560
IDP.1622	AS	rs11191822,rs2365715
IDP.1622	AIS	rs11191822,rs2365715
IDP.1622	SVS	rs11191770,rs11191822,rs17705869,rs199498,rs2365715,rs4673854,rs567754
IDP.1927	AS	rs2365715,rs5745823,rs5749266
IDP.1927	SVS	rs113520245,rs1800282
IDP.1927	CES	rs1004763,rs5745823,rs5749266,rs9487744
IDP.1945	AS	rs199503
IDP.1945	SVS	rs10817101,rs181256816,rs199503,rs2412397,rs2863994
IDP.2078	AS	rs6006426,rs7708285
IDP.2078	AIS	rs6006426,rs62172472,rs7708285
IDP.2004	AS	rs11066309,rs4396807,rs7310615,rs9308343
IDP.2004	AIS	rs11066309,rs1607232,rs17205972,rs4396807,rs7310615
IDP.1463	AS	rs3758575
IDP.1463	SVS	rs3758575
IDP.1463	AIS	rs3758575,rs6459714
IDP.2112	AS	rs9739560
IDP.0013	SVS	rs2817144,rs72878142
IDP.1805	AS	rs10120688,rs11068777,rs199498,rs2365715,rs8141150
IDP.1805	SVS	rs10120688,rs199498,rs8141150
IDP.1805	AIS	rs10120688,rs2365715,rs8141150
IDP.1618	AS	rs11191839,rs13260,rs2303865,rs6007594,rs6442409,rs7314654,rs9112
IDP.1618	AIS	rs11191839,rs13260,rs2303865,rs6007594,rs7314654,rs9112
IDP.1618	SVS	rs11838776,rs2303865,rs2351524,rs7216587
IDP.1476	AS	rs2365715,rs4795529,rs72932765
IDP.1455	SVS	rs199498,rs2965946
IDP.1026	AIS	rs1003399
IDP.0019	SVS	rs150434736,rs2970932
IDP.2102	AS	rs2863994,rs2978098,rs7708285
IDP.2102	AIS	rs2863994,rs7708285
IDP.2102	SVS	rs2863994,rs7708285
IDP.2102	CES	rs17205972
IDP.2087	AS	rs111991836,rs7428430
IDP.2087	AIS	rs111991836,rs7428430
IDP.1629	AS	rs11068773,rs12571024,rs343278,rs79569934
IDP.1629	AIS	rs11068773,rs12571024,rs343278
IDP.1629	SVS	rs10237366,rs12571024,rs199501,rs62324288,rs6806996
IDP.1629	CES	rs11068773
IDP.1929	AS	rs2978101,rs5753615,rs9739560
IDP.1929	CES	rs10058195,rs9739560
IDP.1631	AS	rs11068773,rs1333040,rs9847565
IDP.1631	AIS	rs11068773,rs1333040,rs9847565
IDP.1631	SVS	rs61000833,rs9847565
IDP.1637	AS	rs3769454
IDP.1637	SVS	rs191247549
IDP.1644	AS	rs2303865,rs56093138
IDP.1644	AIS	rs2303865
IDP.1644	SVS	rs2351524,rs72828807,rs7733216,rs9515201
IDP.2114	AS	rs192238573,rs840591
IDP.2114	AIS	rs192238573,rs4061659,rs840591,rs9471179
IDP.2114	SVS	rs192238573,rs34421054,rs9471179
IDP.1470	AS	rs10498450,rs12964435,rs613312
IDP.1470	SVS	rs613312
IDP.2077	AS	rs10883922,rs1948948
IDP.2077	AIS	rs10883922,rs1948948
IDP.2077	SVS	rs1948948,rs2863994,rs4862340,rs72932707
IDP.2115	AIS	rs11694516,rs13013355,rs74564934,rs7708285,rs9471179
IDP.2115	AS	rs11694516,rs13013355,rs74564934,rs7708285,rs9739560
IDP.2123	AS	rs10883908,rs17460016,rs275350,rs9739560
IDP.2123	AIS	rs10883908,rs275350
IDP.2123	SVS	rs10883908
IDP.2028	AIS	rs112926099,rs1411478
IDP.2028	AS	rs112926099
IDP.2074	AS	rs12192990,rs9739560
IDP.2074	AIS	rs10753232
IDP.1498	AS	rs117045141
IDP.1498	AIS	rs117045141
IDP.1818	AS	rs11191772,rs12524544,rs12571024,rs17460016
IDP.1818	AIS	rs12524544,rs12571024,rs17460016,rs1877034
IDP.1818	SVS	rs11191772,rs12524544,rs12571024,rs140244541,rs1877034,rs2412397
IDP.1809	AS	rs12571024,rs4894803
IDP.1809	AIS	rs12571024,rs4894803,rs9471172
IDP.1809	SVS	rs1121960,rs12571024,rs225748,rs4673854,rs9471172
IDP.1488	AIS	rs929294
IDP.1628	AS	rs79928268
IDP.1628	AIS	rs79928268
IDP.1628	SVS	rs10237366,rs11191770,rs199501,rs62324288
IDP.1628	CES	rs7216587,rs79928268
IDP.1796	AS	rs11191822
IDP.1796	AIS	rs11191822,rs76122535
IDP.1796	SVS	rs11191822,rs2412397,rs2863994,rs67308910,rs76122535
IDP.1796	CES	rs11191822
IDP.2003	AS	rs11066320,rs3184504,rs4843552
IDP.2003	AIS	rs11066320,rs3184504,rs4843552
IDP.0693	AS	rs2045258
IDP.1619	AS	rs11191840,rs11948266,rs13260,rs2303865,rs310241,rs7314654,rs9394501
IDP.1619	AIS	rs11191840,rs11948266,rs13260,rs2303865,rs310241,rs9394501
IDP.1619	SVS	rs2303865,rs2351524,rs310241,rs7216587,rs9394501,rs9515201
IDP.1514	SVS	rs911547,rs9471172
IDP.1066	CES	rs11570470
IDP.1626	AS	rs11191840,rs2365715,rs79569934
IDP.1626	AIS	rs11191840,rs140244541,rs2365715
IDP.1626	SVS	rs11191770,rs11191840,rs140244541,rs2365715,rs7699124
IDP.1626	CES	rs10840420
IDP.1632	AS	rs225717,rs2365715,rs35997243
IDP.1632	AIS	rs225717,rs2365715
IDP.1632	SVS	rs225717,rs2365715,rs911547
IDP.1617	AIS	rs6499196
IDP.1617	AS	rs6499196
IDP.2079	AS	rs17460016,rs4233964
IDP.2079	AIS	rs17460016,rs62172372
IDP.2079	SVS	rs117300236
IDP.1948	SVS	rs12767769,rs199501
IDP.1948	AS	rs9911690
IDP.1948	AIS	rs9911690
IDP.1462	SVS	rs9398171
IDP.1627	AS	rs11191772,rs12571024,rs79569934
IDP.1627	AIS	rs11191772,rs1121960,rs12571024,rs140244541
IDP.1627	SVS	rs11191772,rs1121960,rs12571024,rs140244541,rs7699124,rs9521686
IDP.1627	CES	rs10840420,rs1121960
IDP.1817	AS	rs12571024,rs4894803
IDP.1817	AIS	rs12571024,rs4894803
IDP.1817	SVS	rs12571024,rs57694670
IDP.1797	AS	rs2303696,rs2475216
IDP.1797	AIS	rs2303696,rs2475216
IDP.1797	SVS	rs112997627,rs13164785,rs140244541,rs2412397,rs2475216,rs2863994
IDP.0696	CES	rs3758098,rs507429,rs6097618
IDP.1543	AS	rs1806949
IDP.1484	AS	rs12571024
IDP.2111	AIS	rs6006426
IDP.1633	AS	rs11068773,rs2365715
IDP.1633	SVS	rs225714,rs2365715,rs806798,rs911547
IDP.1633	AIS	rs2365715
IDP.2076	AIS	rs1048483
IDP.2076	SVS	rs2863994
IDP.2076	CES	rs6060370
IDP.1605	AIS	rs2365715
IDP.1605	CES	rs10070189,rs13164785
IDP.1605	SVS	rs1724390,rs2365715
IDP.1469	AS	rs10123986,rs11191840,rs117518937,rs8179284
IDP.1469	SVS	rs10052710,rs10123986,rs11191840,rs117653913,rs2863994,rs4871927,rs80087860,rs8179284
IDP.1469	AIS	rs10123986,rs11191840,rs117518937
IDP.1620	AS	rs11589479
IDP.1620	AIS	rs11589479
IDP.1620	SVS	rs111535660,rs142167
IDP.1625	AS	rs11191835,rs2365715
IDP.1625	AIS	rs2365715
IDP.1625	SVS	rs113322852,rs2365715,rs62324288
IDP.1808	AS	rs4894803
IDP.1808	SVS	rs4387287,rs75214355,rs9471172
IDP.0014	AS	rs7198936
IDP.0014	SVS	rs11676147,rs2817144,rs72878142
IDP.0014	AIS	rs115053453,rs7198936
IDP.1933	SVS	rs199498,rs911547,rs944799
IDP.2110	AIS	rs2279829
IDP.1475	SVS	rs111535660,rs13198474,rs199498,rs57694670,rs76122535,rs7733216,rs7893954
IDP.1471	AS	rs12964435,rs7866783,rs9901291
IDP.1642	AS	rs2365715,rs430114,rs4894803,rs5745850
IDP.1642	AIS	rs2365715,rs4894803,rs5745850
IDP.1642	SVS	rs111825734,rs11191770
IDP.1806	AS	rs4894803
IDP.1806	AIS	rs4894803
IDP.1806	SVS	rs199498,rs4387287
IDP.2069	AS	rs11191833,rs12875271,rs2923401,rs4428180,rs6855246
IDP.2069	AIS	rs11191833,rs12875271,rs4428180
IDP.2069	SVS	rs12875271,rs186399184
IDP.2069	CES	rs11191833,rs4428180
IDP.1562	AIS	rs12496226
IDP.1562	SVS	rs12496226
IDP.1562	AS	rs12496226,rs6765322
IDP.1926	SVS	rs11191770,rs142167,rs1724390,rs2365715,rs62324288
IDP.1926	AS	rs2365715,rs2978098,rs5745823,rs5753618
IDP.1924	SVS	rs113322852,rs2365715,rs7699124
IDP.1489	AIS	rs11589479
IDP.1474	AS	rs57694670,rs76122535
IDP.1474	SVS	rs375218,rs57694670,rs7295571,rs760975,rs76122535,rs7893954
IDP.1474	AIS	rs3795736,rs7295571,rs76122535
IDP.1503	AS	rs12694390
IDP.1503	SVS	rs76122535
IDP.1636	AS	rs4678168
IDP.2080	AS	rs12463885,rs1948948,rs8176498
IDP.2080	AIS	rs12463885,rs1948948,rs6006426,rs8176498
IDP.2080	CES	rs12463885,rs17205972
IDP.1561	AS	rs12496226
IDP.1561	SVS	rs12496226
IDP.1904	SVS	rs112997627,rs1333037,rs199498,rs2365715,rs2407393,rs2412397,rs2526303,rs5753639
IDP.1604	AS	rs2365715,rs613312,rs8141150
IDP.1604	SVS	rs1121960,rs113520245,rs199498,rs2365715,rs2412397,rs613312
IDP.0020	CES	rs6432708,rs73220476
IDP.0020	SVS	rs112082260,rs150434736
IDP.1931	SVS	rs199501
IDP.1931	AS	rs11068773,rs199501,rs62560774
IDP.2055	AS	rs17140192,rs2380759
IDP.1925	SVS	rs1121960,rs118087478
IDP.2113	AS	rs12174589,rs7708285,rs9739560
IDP.2113	AIS	rs7708285
IDP.2082	AS	rs1693560
IDP.2082	CES	rs8067689
IDP.1477	AS	rs72932765,rs8093416
IDP.1477	AIS	rs72932765
IDP.2068	AS	rs10786772,rs12875271,rs4428180,rs7314654
IDP.2068	AIS	rs10786772,rs12875271
IDP.2068	SVS	rs11014504,rs12875271,rs2351524
IDP.2068	CES	rs10786772,rs7314654
IDP.2084	AS	rs10883908
IDP.2084	AIS	rs10883908,rs140244541
IDP.2084	SVS	rs140244541
IDP.1515	AS	rs11068773,rs1693560,rs2365715,rs7766042
IDP.1515	SVS	rs225727,rs2365715,rs56362600,rs67248060,rs7766042,rs911547
IDP.2085	AS	rs10883908,rs398528,rs72932707
IDP.2085	AIS	rs10883908,rs72932707
IDP.2085	SVS	rs10883908,rs398528,rs72932707
IDP.1512	SVS	rs67248060,rs76122535,rs911547

## Sheet: Table S4
Table S4: Outliers detected by RadialMR in reverse MR
stroke	IDP	SNP
AIS	IDP.2068	rs11066320,rs11242678,rs3184504,rs473238,rs4942561
AIS	IDP.2076	rs2107595,rs2634074
AIS	IDP.2075	rs11242678
AIS	IDP.2074	rs11066320,rs11242678,rs3184504
AIS	IDP.2102	rs11242678
AIS	IDP.2103	rs11242678
AIS	IDP.0179	rs2066864,rs4942561
AIS	IDP.1619	rs2634074
AIS	IDP.2124	rs11242678,rs2107595,rs3184504,rs635634
AIS	IDP.2093	rs11066320,rs11242678,rs2107595,rs3184504,rs4942561
AIS	IDP.2080	rs11242678,rs2758612,rs4942561
AIS	IDP.2123	rs11242678,rs2107595,rs4942561,rs635634
AIS	IDP.2092	rs11066320,rs11242678,rs2107595,rs3184504,rs4942561
AIS	IDP.1796	rs473238
AIS	IDP.2112	rs11242678,rs2758612
AIS	IDP.2079	rs11242678,rs4942561
AIS	IDP.2073	rs11242678,rs2066864,rs635634
AIS	IDP.2085	rs11066320,rs11242678,rs3184504,rs473238
AIS	IDP.1988	rs635634
AIS	IDP.1627	rs2758612
AIS	IDP.1797	rs2758612
AIS	IDP.1634	rs11066320,rs11242678,rs2758612,rs3184504,rs473238
AIS	IDP.1631	rs2758612,rs473238
AIS	IDP.2113	rs11242678,rs2634074
AIS	IDP.2070	rs11066320,rs3184504
AIS	IDP.1635	rs11242678,rs2758612,rs3184504,rs473238
AIS	IDP.2082	rs11242678,rs4942561
AIS	IDP.1629	rs2758612
AIS	IDP.0349	rs11066320,rs3184504,rs635634
AIS	IDP.2114	rs11242678,rs2107595,rs2758612,rs473238,rs4942561
AIS	IDP.2084	rs11066320,rs11242678,rs2066864,rs2107595,rs3184504
AIS	IDP.1628	rs2758612,rs473238
AIS	IDP.1625	rs2758612,rs473238
AIS	IDP.1817	rs635634
AIS	IDP.1605	rs2758612
AIS	IDP.2078	rs11242678,rs2634074,rs473238,rs4942561
AIS	IDP.2094	rs11242678
AIS	IDP.1623	rs2634074
AIS	IDP.2115	rs11242678,rs2107595,rs2758612,rs4942561
AIS	IDP.1807	rs2758612,rs473238
AIS	IDP.2111	rs11242678,rs2758612,rs3184504,rs4942561
AIS	IDP.2072	rs4942561
AIS	IDP.1624	rs2758612
AIS	IDP.1620	rs2634074
AIS	IDP.1642	rs473238
AIS	IDP.1818	rs635634
AIS	IDP.1025	rs473238
AIS	IDP.1030	rs635634
AIS	IDP.1561	rs3184504
AIS	IDP.1621	rs2634074
AIS	IDP.1606	rs2758612,rs4942561
AIS	IDP.2100	rs11066320,rs3184504
AIS	IDP.1026	rs2066864,rs4942561,rs635634
AIS	IDP.2060	rs4942561,rs635634
AIS	IDP.1469	rs2634074,rs4942561
AIS	IDP.1648	rs2066864,rs2634074,rs3184504,rs4942561
AIS	IDP.1805	rs473238
AIS	IDP.2101	rs11066320,rs11242678,rs2066864,rs3184504,rs4942561
AIS	IDP.1998	rs4942561
AIS	IDP.2008	rs4942561
AIS	IDP.1808	rs473238
AIS	IDP.1489	rs4942561
AIS	IDP.1488	rs4942561
AIS	IDP.2086	rs11066320,rs11242678,rs2107595,rs3184504,rs473238,rs4942561
AIS	IDP.1637	rs2758612
AIS	IDP.1633	rs2758612
AIS	IDP.2087	rs11066320,rs11242678,rs2066864,rs2107595,rs3184504
AIS	IDP.2110	rs11066320,rs2634074,rs3184504,rs34311906,rs473238
AIS	IDP.1948	rs2758612,rs4942561
AIS	IDP.2003	rs11066320,rs2634074,rs3184504,rs473238,rs4942561,rs635634
AIS	IDP.2014	rs2634074,rs4942561
AIS	IDP.1477	rs3184504
AIS	IDP.1481	rs2758612
AIS	IDP.2004	rs11066320,rs2634074,rs3184504,rs473238,rs4942561
AIS	IDP.1523	rs11066320,rs2066864,rs3184504,rs473238
AIS	IDP.1794	rs11066320,rs3184504
AIS	IDP.1928	rs2758612,rs4942561
AIS	IDP.1474	rs11066320,rs2634074,rs4942561
AIS	IDP.1498	rs11242678,rs2758612,rs4942561
AS	IDP.2068	rs10774624,rs11066283,rs11587860,rs1537375,rs475937,rs4942561
AS	IDP.2076	rs2634074
AS	IDP.2069	rs11587860,rs1537375
AS	IDP.2075	rs11242678,rs475937
AS	IDP.2074	rs10774624,rs11066283,rs11242678,rs1537375,rs475937
AS	IDP.1619	rs2634074
AS	IDP.2102	rs11242678
AS	IDP.2103	rs1537375
AS	IDP.0179	rs10774624,rs4942561
AS	IDP.2124	rs10774624,rs11066283,rs11242678,rs2107595
AS	IDP.1796	rs1537375
AS	IDP.2123	rs11242678,rs2634074,rs4942561
AS	IDP.2093	rs10774624,rs11066283,rs11242678,rs1537375,rs2107595,rs4942561
AS	IDP.1627	rs11587860,rs1537375
AS	IDP.2079	rs11066283,rs475937,rs4942561
AS	IDP.2080	rs11242678,rs475937,rs4942561
AS	IDP.1626	rs1537375
AS	IDP.1634	rs10774624,rs11066283,rs11242678,rs11587860
AS	IDP.2085	rs10774624,rs11066283,rs11242678,rs11587860,rs1537375,rs475937
AS	IDP.1629	rs11587860,rs1537375
AS	IDP.2092	rs10774624,rs11066283,rs11242678,rs1537375,rs2107595,rs475937,rs4942561
AS	IDP.1635	rs10774624,rs11066283,rs11242678,rs11587860
AS	IDP.1625	rs11587860,rs1537375
AS	IDP.1620	rs1537375
AS	IDP.2112	rs11242678,rs475937
AS	IDP.1631	rs11587860,rs1537375
AS	IDP.1644	rs10774624,rs1537375
AS	IDP.1605	rs11587860,rs1537375
AS	IDP.1630	rs1537375
AS	IDP.2094	rs11242678
AS	IDP.2070	rs10774624,rs11066283,rs475937
AS	IDP.1628	rs11587860,rs1537375
AS	IDP.2084	rs10774624,rs11066283,rs11242678,rs11587860,rs1537375,rs2107595,rs475937
AS	IDP.1807	rs11242678,rs11587860,rs1537375
AS	IDP.1645	rs10774624,rs1537375
AS	IDP.1817	rs11242678,rs1537375
AS	IDP.2073	rs11242678
AS	IDP.1806	rs1537375
AS	IDP.2082	rs10774624,rs11066283,rs11242678,rs475937,rs4942561
AS	IDP.1624	rs11587860,rs1537375
AS	IDP.2113	rs11242678,rs1537375,rs2634074,rs475937
AS	IDP.2078	rs11242678,rs2634074,rs475937,rs4942561
AS	IDP.2111	rs10774624,rs11066283,rs11242678,rs1537375,rs475937,rs4942561
AS	IDP.1632	rs1537375
AS	IDP.1469	rs2634074
AS	IDP.1805	rs11242678,rs1537375,rs4942561
AS	IDP.1818	rs11242678,rs1537375
AS	IDP.2114	rs11242678,rs475937
AS	IDP.1623	rs1537375
AS	IDP.1642	rs11242678,rs1537375
AS	IDP.1621	rs1537375,rs2107595
AS	IDP.1643	rs1537375
AS	IDP.1622	rs1537375
AS	IDP.1537	rs1537375
AS	IDP.2115	rs11242678,rs2107595,rs475937,rs4942561
AS	IDP.1809	rs11242678,rs1537375
AS	IDP.1474	rs10774624,rs11066283,rs1537375,rs2634074,rs4942561
AS	IDP.1808	rs11242678,rs1537375
AS	IDP.1637	rs11587860,rs1537375
AS	IDP.1477	rs10774624,rs1537375,rs4942561
AS	IDP.1481	rs11587860,rs1537375
AS	IDP.0014	rs1537375
AS	IDP.2004	rs10774624,rs11066283,rs2634074,rs475937,rs4942561
AS	IDP.1633	rs11587860,rs1537375
AS	IDP.1502	rs11242678,rs11587860,rs1537375,rs2634074
AS	IDP.1929	rs10774624,rs11587860,rs1537375,rs4942561
AS	IDP.1561	rs10774624,rs11066283,rs11587860,rs1537375,rs4942561
AS	IDP.1604	rs1537375,rs4942561
AS	IDP.1928	rs10774624,rs11587860,rs1537375,rs4942561
AS	IDP.1606	rs11587860,rs1537375,rs475937
AS	IDP.1480	rs11587860,rs1537375
AS	IDP.1025	rs475937
AS	IDP.1476	rs10774624
AS	IDP.2066	rs11587860
AS	IDP.1503	rs2634074
AS	IDP.2100	rs10774624,rs11066283,rs11587860,rs1537375,rs475937
AS	IDP.2086	rs10774624,rs11066283,rs11242678,rs11587860,rs1537375,rs475937,rs4942561
AS	IDP.1523	rs10774624,rs11066283,rs11587860
AS	IDP.2060	rs4942561
AS	IDP.1460	rs4942561
AS	IDP.1479	rs10774624,rs11066283,rs11587860,rs1537375,rs4942561
AS	IDP.2101	rs10774624,rs11066283,rs11242678,rs11587860,rs1537375,rs475937,rs4942561
AS	IDP.1648	rs10774624,rs11066283,rs11587860,rs1537375,rs2634074,rs4942561
AS	IDP.1948	rs11587860,rs4942561
AS	IDP.2087	rs10774624,rs11066283,rs11242678,rs11587860,rs1537375,rs2107595,rs475937
AS	IDP.1927	rs11587860,rs1537375
AS	IDP.1466	rs1537375
AS	IDP.2003	rs10774624,rs11066283,rs1537375,rs2634074,rs475937,rs4942561
AS	IDP.1484	rs11587860
AS	IDP.1488	rs11242678,rs1537375,rs4942561
AS	IDP.1794	rs11066283,rs11587860
AS	IDP.1515	rs11242678,rs11587860,rs1537375,rs475937,rs4942561
AS	IDP.2058	rs4942561
AS	IDP.1931	rs11587860,rs1537375,rs4942561
AS	IDP.0349	rs4942561
AS	IDP.1471	rs1537375
AS	IDP.1795	rs10774624,rs11587860,rs4942561
AS	IDP.1636	rs11587860,rs1537375
AS	IDP.1026	rs4942561
AS	IDP.2054	rs4942561
AS	IDP.1511	rs1537375
AS	IDP.1498	rs11587860,rs1537375,rs4942561
AS	IDP.1930	rs11587860,rs1537375
AS	IDP.1991	rs4942561
AS	IDP.1562	rs1537375
AS	IDP.1945	rs10774624,rs11066283,rs1537375,rs2634074
AS	IDP.1926	rs10774624,rs11587860,rs1537375
AS	IDP.1949	rs10774624,rs11587860,rs1537375,rs4942561
AS	IDP.1494	rs11587860,rs1537375,rs4942561
AS	IDP.0394	rs11587860
AS	IDP.1485	rs1537375
AS	IDP.1617	rs1537375

## Sheet: Table S5
Table S5: IVs associated with confounders in forward MR
SNP	Phenotype (Confounder)	Ancestry	P value	Exposure-Outcome
rs199498	Alcohol intake frequency	European	1.95e-08	IDP.1634-AS
rs199498	Alcohol intake frequency	European	1.95e-08	IDP.1634-AIS
rs199498	Alcohol intake frequency	European	1.95e-08	IDP.1634-SVS
rs13107325	Alcohol intake frequency	European	7.88e-14	IDP.1991-SVS
rs62474683	Current tobacco smoking	European	1.19e-10	IDP.1991-SVS
rs13107325	Alcohol intake frequency	European	7.88e-14	IDP.1991-AS
rs62474683	Current tobacco smoking	European	1.19e-10	IDP.1991-AS
rs13107325	Alcohol intake frequency	European	7.88e-14	IDP.1542-SVS
rs62474683	Current tobacco smoking	European	1.19e-10	IDP.1542-SVS
rs1246263	Past tobacco smoking	European	1.75e-09	IDP.1468-AS
rs1246263	Past tobacco smoking	European	1.75e-09	IDP.1468-AIS
rs1246263	Past tobacco smoking	European	1.75e-09	IDP.1468-SVS
rs199498	Alcohol intake frequency	European	1.95e-08	IDP.1511-SVS
rs199498	Alcohol intake frequency	European	1.95e-08	IDP.1511-AS
rs13107325	Alcohol intake frequency	European	7.88e-14	IDP.1077-CES
rs199526	Alcohol intake frequency	European	1.25e-08	IDP.1502-AS
rs199526	Alcohol intake frequency	European	1.25e-08	IDP.1502-SVS
rs13107325	Alcohol intake frequency	European	7.88e-14	IDP.1064-CES
rs16940671	Alcohol intake frequency	European	4.75e-10	IDP.2009-AIS
rs16940671	Alcohol intake frequency	European	4.75e-10	IDP.2009-AS
rs199498	Alcohol intake frequency	European	1.95e-08	IDP.1807-AS
rs199498	Alcohol intake frequency	European	1.95e-08	IDP.1807-AIS
rs199498	Alcohol intake frequency	European	1.95e-08	IDP.1807-SVS
rs13107325	Alcohol intake frequency	European	7.88e-14	IDP.1930-SVS
rs13107325	Alcohol intake frequency	European	7.88e-14	IDP.1930-AS
rs118087478	Alcohol intake frequency	European	3.64e-10	IDP.1635-AS
rs6482385	Vascular or heart problems diagnosed by doctor: high blood pressure	European	1.2e-08	IDP.1635-AS
rs6482385	Vascular or heart problems diagnosed by doctor: high blood pressure	European	1.2e-08	IDP.1635-AIS
rs118087478	Alcohol intake frequency	European	3.64e-10	IDP.1635-SVS
rs6482385	Vascular or heart problems diagnosed by doctor: high blood pressure	European	1.2e-08	IDP.1635-SVS
rs13107325	Alcohol intake frequency	European	7.88e-14	IDP.1992-SVS
rs62474683	Current tobacco smoking	European	1.19e-10	IDP.1992-SVS
rs199498	Alcohol intake frequency	European	1.95e-08	IDP.1454-SVS
rs13107325	Alcohol intake frequency	European	7.88e-14	IDP.1616-CES
rs6482385	Vascular or heart problems diagnosed by doctor: high blood pressure	European	1.2e-08	IDP.0179-AS
rs6482385	Vascular or heart problems diagnosed by doctor: high blood pressure	European	1.2e-08	IDP.0179-AIS
rs6482385	Vascular or heart problems diagnosed by doctor: high blood pressure	European	1.2e-08	IDP.0179-SVS
rs199498	Alcohol intake frequency	European	1.95e-08	IDP.1624-AS
rs806789	Pack years of smoking preview only	European	4.02e-11	IDP.1624-AS
rs199498	Alcohol intake frequency	European	1.95e-08	IDP.1624-SVS
rs806789	Pack years of smoking preview only	European	4.02e-11	IDP.1624-SVS
rs199498	Alcohol intake frequency	European	1.95e-08	IDP.1624-AIS
rs806789	Pack years of smoking preview only	European	4.02e-11	IDP.1624-AIS
rs199498	Alcohol intake frequency	European	1.95e-08	IDP.1624-CES
rs806789	Pack years of smoking preview only	European	4.02e-11	IDP.1624-CES
rs174538	Average weekly champagne plus white wine intake	European	3.49e-08	IDP.1479-AS
rs174538	Average weekly champagne plus white wine intake	European	3.49e-08	IDP.1479-CES
rs174538	Average weekly champagne plus white wine intake	European	3.49e-08	IDP.1479-SVS
rs199498	Alcohol intake frequency	European	1.95e-08	IDP.1622-AS
rs806977	Pack years of smoking preview only	European	2.08e-11	IDP.1622-AS
rs199498	Alcohol intake frequency	European	1.95e-08	IDP.1622-AIS
rs806977	Pack years of smoking preview only	European	2.08e-11	IDP.1622-AIS
rs199498	Alcohol intake frequency	European	1.95e-08	IDP.1622-SVS
rs806977	Pack years of smoking preview only	European	2.08e-11	IDP.1622-SVS
rs113520245	Alcohol intake frequency	European	2.79e-09	IDP.1927-AS
rs113520245	Alcohol intake frequency	European	2.79e-09	IDP.1927-SVS
rs113520245	Alcohol intake frequency	European	2.79e-09	IDP.1927-CES
rs199533	Alcohol intake frequency	European	1.36e-10	IDP.2004-AS
rs199533	Alcohol intake frequency	European	1.36e-10	IDP.2004-AIS
rs13107325	Alcohol intake frequency	European	7.88e-14	IDP.1044-AIS
rs12952581	Vascular or heart problems diagnosed by doctor: high blood pressure	European	1.18e-13	IDP.0013-SVS
rs2650492	Alcohol intake frequency	European	3.24e-17	IDP.0013-SVS
rs1543681	Pack years of smoking preview only	European	2.85e-11	IDP.1805-AS
rs199498	Alcohol intake frequency	European	1.95e-08	IDP.1805-AS
rs1543681	Pack years of smoking preview only	European	2.85e-11	IDP.1805-SVS
rs199498	Alcohol intake frequency	European	1.95e-08	IDP.1805-SVS
rs1543681	Pack years of smoking preview only	European	2.85e-11	IDP.1805-AIS
rs199498	Alcohol intake frequency	European	1.95e-08	IDP.1805-AIS
rs6668533	Vascular or heart problems diagnosed by doctor: high blood pressure	European	1.14e-08	IDP.0703-SVS
rs174538	Average weekly champagne plus white wine intake	European	3.49e-08	IDP.1455-SVS
rs199498	Alcohol intake frequency	European	1.95e-08	IDP.1455-SVS
rs13107325	Alcohol intake frequency	European	7.88e-14	IDP.2028-AIS
rs13107325	Alcohol intake frequency	European	7.88e-14	IDP.2028-AS
rs13107325	Alcohol intake frequency	European	7.88e-14	IDP.0693-CES
rs13107325	Alcohol intake frequency	European	7.88e-14	IDP.0693-AS
rs55686102	Alcohol intake frequency	European	2.49e-10	IDP.1619-AS
rs55686102	Alcohol intake frequency	European	2.49e-10	IDP.1619-AIS
rs55686102	Alcohol intake frequency	European	2.49e-10	IDP.1619-SVS
rs12904134	Vascular or heart problems diagnosed by doctor: high blood pressure	European	3.98e-10	IDP.1066-CES
rs13107325	Alcohol intake frequency	European	7.88e-14	IDP.1066-CES
rs806789	Pack years of smoking preview only	European	4.02e-11	IDP.1632-AS
rs806789	Pack years of smoking preview only	European	4.02e-11	IDP.1632-AIS
rs806789	Pack years of smoking preview only	European	4.02e-11	IDP.1632-SVS
rs13107325	Alcohol intake frequency	European	7.88e-14	IDP.1617-AIS
rs13107325	Alcohol intake frequency	European	7.88e-14	IDP.1617-AS
rs199498	Alcohol intake frequency	European	1.95e-08	IDP.1797-AS
rs6482385	Vascular or heart problems diagnosed by doctor: high blood pressure	European	1.2e-08	IDP.1797-AS
rs199498	Alcohol intake frequency	European	1.95e-08	IDP.1797-AIS
rs6482385	Vascular or heart problems diagnosed by doctor: high blood pressure	European	1.2e-08	IDP.1797-AIS
rs199498	Alcohol intake frequency	European	1.95e-08	IDP.1797-SVS
rs6482385	Vascular or heart problems diagnosed by doctor: high blood pressure	European	1.2e-08	IDP.1797-SVS
rs199498	Alcohol intake frequency	European	1.95e-08	IDP.1797-CES
rs6482385	Vascular or heart problems diagnosed by doctor: high blood pressure	European	1.2e-08	IDP.1797-CES
rs56116382	Years of educational attainment	European	7.3e-11	IDP.1484-AS
rs806798	Pack years of smoking preview only	European	4.23e-11	IDP.1633-AS
rs806798	Pack years of smoking preview only	European	4.23e-11	IDP.1633-SVS
rs806798	Pack years of smoking preview only	European	4.23e-11	IDP.1633-AIS
rs7221079	Vascular or heart problems diagnosed by doctor: high blood pressure	European	5.22e-09	IDP.2076-AS
rs7221079	Vascular or heart problems diagnosed by doctor: high blood pressure	European	5.22e-09	IDP.2076-AIS
rs7221079	Vascular or heart problems diagnosed by doctor: high blood pressure	European	5.22e-09	IDP.2076-SVS
rs7221079	Vascular or heart problems diagnosed by doctor: high blood pressure	European	5.22e-09	IDP.2076-CES
rs1724390	Alcohol intake frequency	European	7.52e-10	IDP.1605-AS
rs174538	Average weekly champagne plus white wine intake	European	3.49e-08	IDP.1605-AS
rs1724390	Alcohol intake frequency	European	7.52e-10	IDP.1605-AIS
rs174538	Average weekly champagne plus white wine intake	European	3.49e-08	IDP.1605-AIS
rs1724390	Alcohol intake frequency	European	7.52e-10	IDP.1605-CES
rs174538	Average weekly champagne plus white wine intake	European	3.49e-08	IDP.1605-CES
rs1724390	Alcohol intake frequency	European	7.52e-10	IDP.1605-SVS
rs174538	Average weekly champagne plus white wine intake	European	3.49e-08	IDP.1605-SVS
rs607062	Age completed full time education	European	1.17e-08	IDP.1467-SVS
rs2650492	Alcohol intake frequency	European	3.24e-17	IDP.0014-AS
rs2650492	Alcohol intake frequency	European	3.24e-17	IDP.0014-SVS
rs2650492	Alcohol intake frequency	European	3.24e-17	IDP.0014-AIS
rs199498	Alcohol intake frequency	European	1.95e-08	IDP.1933-SVS
rs199498	Alcohol intake frequency	European	1.95e-08	IDP.1475-SVS
rs13107325	Alcohol intake frequency	European	7.88e-14	IDP.1030-AIS
rs199498	Alcohol intake frequency	European	1.95e-08	IDP.1806-AS
rs199498	Alcohol intake frequency	European	1.95e-08	IDP.1806-AIS
rs199498	Alcohol intake frequency	European	1.95e-08	IDP.1806-SVS
rs6855246	Alcohol intake frequency	European	1.79e-09	IDP.2069-AS
rs6855246	Alcohol intake frequency	European	1.79e-09	IDP.2069-AIS
rs6855246	Alcohol intake frequency	European	1.79e-09	IDP.2069-SVS
rs6855246	Alcohol intake frequency	European	1.79e-09	IDP.2069-CES
rs13107325	Alcohol intake frequency	European	7.88e-14	IDP.1926-SVS
rs1724390	Alcohol intake frequency	European	7.52e-10	IDP.1926-SVS
rs13107325	Alcohol intake frequency	European	7.88e-14	IDP.1926-AS
rs1724390	Alcohol intake frequency	European	7.52e-10	IDP.1926-AS
rs199498	Alcohol intake frequency	European	1.95e-08	IDP.1904-SVS
rs806977	Pack years of smoking preview only	European	2.08e-11	IDP.1904-SVS
rs113520245	Alcohol intake frequency	European	2.79e-09	IDP.1604-AS
rs199498	Alcohol intake frequency	European	1.95e-08	IDP.1604-AS
rs113520245	Alcohol intake frequency	European	2.79e-09	IDP.1604-SVS
rs199498	Alcohol intake frequency	European	1.95e-08	IDP.1604-SVS
rs6432708	Smoking status: previous	European	7.36e-10	IDP.0020-CES
rs6432708	Smoking status: previous	European	7.36e-10	IDP.0020-SVS
rs13107325	Alcohol intake frequency	European	7.88e-14	IDP.1931-SVS
rs13107325	Alcohol intake frequency	European	7.88e-14	IDP.1931-AS
rs62056851	Alcohol intake frequency	European	2.29e-10	IDP.2037-CES
rs118087478	Alcohol intake frequency	European	3.64e-10	IDP.1925-SVS
rs13107325	Alcohol intake frequency	European	7.88e-14	IDP.2113-AS
rs13107325	Alcohol intake frequency	European	7.88e-14	IDP.2113-AIS
rs13107325	Alcohol intake frequency	European	7.88e-14	IDP.2068-AS
rs13107325	Alcohol intake frequency	European	7.88e-14	IDP.2068-AIS
rs13107325	Alcohol intake frequency	European	7.88e-14	IDP.2068-SVS
rs13107325	Alcohol intake frequency	European	7.88e-14	IDP.2068-CES

## Sheet: Table S6
Table S6: IVs associated with confounders in reverse MR
SNP	Phenotype (Confounder)	Ancestry	P value	Exposure-Outcome
rs11066320	Vascular or heart problems diagnosed by doctor: high blood pressure	European	1.57e-16	AIS-IDP.2068
rs3184504	Vascular or heart problems diagnosed by doctor: high blood pressure	European	7.3e-29	AIS-IDP.2068
rs635634	Vascular or heart problems diagnosed by doctor: high blood pressure	European	4.36e-09	AIS-IDP.2068
rs11066320	Vascular or heart problems diagnosed by doctor: high blood pressure	European	1.57e-16	AIS-IDP.2076
rs3184504	Vascular or heart problems diagnosed by doctor: high blood pressure	European	7.3e-29	AIS-IDP.2076
rs635634	Vascular or heart problems diagnosed by doctor: high blood pressure	European	4.36e-09	AIS-IDP.2076
rs11066320	Vascular or heart problems diagnosed by doctor: high blood pressure	European	1.57e-16	AIS-IDP.2077
rs3184504	Vascular or heart problems diagnosed by doctor: high blood pressure	European	7.3e-29	AIS-IDP.2077
rs635634	Vascular or heart problems diagnosed by doctor: high blood pressure	European	4.36e-09	AIS-IDP.2077
rs11066320	Vascular or heart problems diagnosed by doctor: high blood pressure	European	1.57e-16	AIS-IDP.2069
rs3184504	Vascular or heart problems diagnosed by doctor: high blood pressure	European	7.3e-29	AIS-IDP.2069
rs635634	Vascular or heart problems diagnosed by doctor: high blood pressure	European	4.36e-09	AIS-IDP.2069
rs11066320	Vascular or heart problems diagnosed by doctor: high blood pressure	European	1.57e-16	AIS-IDP.2075
rs3184504	Vascular or heart problems diagnosed by doctor: high blood pressure	European	7.3e-29	AIS-IDP.2075
rs635634	Vascular or heart problems diagnosed by doctor: high blood pressure	European	4.36e-09	AIS-IDP.2075
rs11066320	Vascular or heart problems diagnosed by doctor: high blood pressure	European	1.57e-16	AIS-IDP.2074
rs3184504	Vascular or heart problems diagnosed by doctor: high blood pressure	European	7.3e-29	AIS-IDP.2074
rs635634	Vascular or heart problems diagnosed by doctor: high blood pressure	European	4.36e-09	AIS-IDP.2074
rs11066320	Vascular or heart problems diagnosed by doctor: high blood pressure	European	1.57e-16	AIS-IDP.1618
rs3184504	Vascular or heart problems diagnosed by doctor: high blood pressure	European	7.3e-29	AIS-IDP.1618
rs635634	Vascular or heart problems diagnosed by doctor: high blood pressure	European	4.36e-09	AIS-IDP.1618
rs11066320	Vascular or heart problems diagnosed by doctor: high blood pressure	European	1.57e-16	AIS-IDP.2102
rs3184504	Vascular or heart problems diagnosed by doctor: high blood pressure	European	7.3e-29	AIS-IDP.2102
rs635634	Vascular or heart problems diagnosed by doctor: high blood pressure	European	4.36e-09	AIS-IDP.2102
rs11066320	Vascular or heart problems diagnosed by doctor: high blood pressure	European	1.57e-16	AIS-IDP.2103
rs3184504	Vascular or heart problems diagnosed by doctor: high blood pressure	European	7.3e-29	AIS-IDP.2103
rs635634	Vascular or heart problems diagnosed by doctor: high blood pressure	European	4.36e-09	AIS-IDP.2103
rs11066320	Vascular or heart problems diagnosed by doctor: high blood pressure	European	1.57e-16	AIS-IDP.2071
rs3184504	Vascular or heart problems diagnosed by doctor: high blood pressure	European	7.3e-29	AIS-IDP.2071
rs635634	Vascular or heart problems diagnosed by doctor: high blood pressure	European	4.36e-09	AIS-IDP.2071
rs11066320	Vascular or heart problems diagnosed by doctor: high blood pressure	European	1.57e-16	AIS-IDP.0179
rs3184504	Vascular or heart problems diagnosed by doctor: high blood pressure	European	7.3e-29	AIS-IDP.0179
rs635634	Vascular or heart problems diagnosed by doctor: high blood pressure	European	4.36e-09	AIS-IDP.0179
rs11066320	Vascular or heart problems diagnosed by doctor: high blood pressure	European	1.57e-16	AIS-IDP.1619
rs3184504	Vascular or heart problems diagnosed by doctor: high blood pressure	European	7.3e-29	AIS-IDP.1619
rs635634	Vascular or heart problems diagnosed by doctor: high blood pressure	European	4.36e-09	AIS-IDP.1619
rs11066320	Vascular or heart problems diagnosed by doctor: high blood pressure	European	1.57e-16	AIS-IDP.2124
rs3184504	Vascular or heart problems diagnosed by doctor: high blood pressure	European	7.3e-29	AIS-IDP.2124
rs635634	Vascular or heart problems diagnosed by doctor: high blood pressure	European	4.36e-09	AIS-IDP.2124
rs11066320	Vascular or heart problems diagnosed by doctor: high blood pressure	European	1.57e-16	AIS-IDP.2093
rs3184504	Vascular or heart problems diagnosed by doctor: high blood pressure	European	7.3e-29	AIS-IDP.2093
rs635634	Vascular or heart problems diagnosed by doctor: high blood pressure	European	4.36e-09	AIS-IDP.2093
rs11066320	Vascular or heart problems diagnosed by doctor: high blood pressure	European	1.57e-16	AIS-IDP.2080
rs3184504	Vascular or heart problems diagnosed by doctor: high blood pressure	European	7.3e-29	AIS-IDP.2080
rs635634	Vascular or heart problems diagnosed by doctor: high blood pressure	European	4.36e-09	AIS-IDP.2080
rs11066320	Vascular or heart problems diagnosed by doctor: high blood pressure	European	1.57e-16	AIS-IDP.2123
rs3184504	Vascular or heart problems diagnosed by doctor: high blood pressure	European	7.3e-29	AIS-IDP.2123
rs635634	Vascular or heart problems diagnosed by doctor: high blood pressure	European	4.36e-09	AIS-IDP.2123
rs11066320	Vascular or heart problems diagnosed by doctor: high blood pressure	European	1.57e-16	AIS-IDP.2081
rs3184504	Vascular or heart problems diagnosed by doctor: high blood pressure	European	7.3e-29	AIS-IDP.2081
rs635634	Vascular or heart problems diagnosed by doctor: high blood pressure	European	4.36e-09	AIS-IDP.2081
rs11066320	Vascular or heart problems diagnosed by doctor: high blood pressure	European	1.57e-16	AIS-IDP.2092
rs3184504	Vascular or heart problems diagnosed by doctor: high blood pressure	European	7.3e-29	AIS-IDP.2092
rs635634	Vascular or heart problems diagnosed by doctor: high blood pressure	European	4.36e-09	AIS-IDP.2092
rs11066320	Vascular or heart problems diagnosed by doctor: high blood pressure	European	1.57e-16	AIS-IDP.1796
rs3184504	Vascular or heart problems diagnosed by doctor: high blood pressure	European	7.3e-29	AIS-IDP.1796
rs635634	Vascular or heart problems diagnosed by doctor: high blood pressure	European	4.36e-09	AIS-IDP.1796
rs11066320	Vascular or heart problems diagnosed by doctor: high blood pressure	European	1.57e-16	AIS-IDP.2112
rs3184504	Vascular or heart problems diagnosed by doctor: high blood pressure	European	7.3e-29	AIS-IDP.2112
rs635634	Vascular or heart problems diagnosed by doctor: high blood pressure	European	4.36e-09	AIS-IDP.2112
rs11066320	Vascular or heart problems diagnosed by doctor: high blood pressure	European	1.57e-16	AIS-IDP.1468
rs3184504	Vascular or heart problems diagnosed by doctor: high blood pressure	European	7.3e-29	AIS-IDP.1468
rs635634	Vascular or heart problems diagnosed by doctor: high blood pressure	European	4.36e-09	AIS-IDP.1468
rs11066320	Vascular or heart problems diagnosed by doctor: high blood pressure	European	1.57e-16	AIS-IDP.2079
rs3184504	Vascular or heart problems diagnosed by doctor: high blood pressure	European	7.3e-29	AIS-IDP.2079
rs635634	Vascular or heart problems diagnosed by doctor: high blood pressure	European	4.36e-09	AIS-IDP.2079
rs11066320	Vascular or heart problems diagnosed by doctor: high blood pressure	European	1.57e-16	AIS-IDP.2073
rs3184504	Vascular or heart problems diagnosed by doctor: high blood pressure	European	7.3e-29	AIS-IDP.2073
rs635634	Vascular or heart problems diagnosed by doctor: high blood pressure	European	4.36e-09	AIS-IDP.2073
rs11066320	Vascular or heart problems diagnosed by doctor: high blood pressure	European	1.57e-16	AIS-IDP.2085
rs3184504	Vascular or heart problems diagnosed by doctor: high blood pressure	European	7.3e-29	AIS-IDP.2085
rs635634	Vascular or heart problems diagnosed by doctor: high blood pressure	European	4.36e-09	AIS-IDP.2085
rs11066320	Vascular or heart problems diagnosed by doctor: high blood pressure	European	1.57e-16	AIS-IDP.1626
rs3184504	Vascular or heart problems diagnosed by doctor: high blood pressure	European	7.3e-29	AIS-IDP.1626
rs635634	Vascular or heart problems diagnosed by doctor: high blood pressure	European	4.36e-09	AIS-IDP.1626
rs11066320	Vascular or heart problems diagnosed by doctor: high blood pressure	European	1.57e-16	AIS-IDP.1988
rs3184504	Vascular or heart problems diagnosed by doctor: high blood pressure	European	7.3e-29	AIS-IDP.1988
rs635634	Vascular or heart problems diagnosed by doctor: high blood pressure	European	4.36e-09	AIS-IDP.1988
rs11066320	Vascular or heart problems diagnosed by doctor: high blood pressure	European	1.57e-16	AIS-IDP.1627
rs3184504	Vascular or heart problems diagnosed by doctor: high blood pressure	European	7.3e-29	AIS-IDP.1627
rs635634	Vascular or heart problems diagnosed by doctor: high blood pressure	European	4.36e-09	AIS-IDP.1627
rs11066320	Vascular or heart problems diagnosed by doctor: high blood pressure	European	1.57e-16	AIS-IDP.1630
rs3184504	Vascular or heart problems diagnosed by doctor: high blood pressure	European	7.3e-29	AIS-IDP.1630
rs635634	Vascular or heart problems diagnosed by doctor: high blood pressure	European	4.36e-09	AIS-IDP.1630
rs11066320	Vascular or heart problems diagnosed by doctor: high blood pressure	European	1.57e-16	AIS-IDP.1797
rs3184504	Vascular or heart problems diagnosed by doctor: high blood pressure	European	7.3e-29	AIS-IDP.1797
rs635634	Vascular or heart problems diagnosed by doctor: high blood pressure	European	4.36e-09	AIS-IDP.1797
rs11066320	Vascular or heart problems diagnosed by doctor: high blood pressure	European	1.57e-16	AIS-IDP.1634
rs3184504	Vascular or heart problems diagnosed by doctor: high blood pressure	European	7.3e-29	AIS-IDP.1634
rs635634	Vascular or heart problems diagnosed by doctor: high blood pressure	European	4.36e-09	AIS-IDP.1634
rs11066320	Vascular or heart problems diagnosed by doctor: high blood pressure	European	1.57e-16	AIS-IDP.1631
rs3184504	Vascular or heart problems diagnosed by doctor: high blood pressure	European	7.3e-29	AIS-IDP.1631
rs635634	Vascular or heart problems diagnosed by doctor: high blood pressure	European	4.36e-09	AIS-IDP.1631
rs11066320	Vascular or heart problems diagnosed by doctor: high blood pressure	European	1.57e-16	AIS-IDP.2113
rs3184504	Vascular or heart problems diagnosed by doctor: high blood pressure	European	7.3e-29	AIS-IDP.2113
rs635634	Vascular or heart problems diagnosed by doctor: high blood pressure	European	4.36e-09	AIS-IDP.2113
rs11066320	Vascular or heart problems diagnosed by doctor: high blood pressure	European	1.57e-16	AIS-IDP.1987
rs3184504	Vascular or heart problems diagnosed by doctor: high blood pressure	European	7.3e-29	AIS-IDP.1987
rs635634	Vascular or heart problems diagnosed by doctor: high blood pressure	European	4.36e-09	AIS-IDP.1987
rs11066320	Vascular or heart problems diagnosed by doctor: high blood pressure	European	1.57e-16	AIS-IDP.2055
rs3184504	Vascular or heart problems diagnosed by doctor: high blood pressure	European	7.3e-29	AIS-IDP.2055
rs635634	Vascular or heart problems diagnosed by doctor: high blood pressure	European	4.36e-09	AIS-IDP.2055
rs11066320	Vascular or heart problems diagnosed by doctor: high blood pressure	European	1.57e-16	AIS-IDP.2070
rs3184504	Vascular or heart problems diagnosed by doctor: high blood pressure	European	7.3e-29	AIS-IDP.2070
rs635634	Vascular or heart problems diagnosed by doctor: high blood pressure	European	4.36e-09	AIS-IDP.2070
rs11066320	Vascular or heart problems diagnosed by doctor: high blood pressure	European	1.57e-16	AIS-IDP.1635
rs3184504	Vascular or heart problems diagnosed by doctor: high blood pressure	European	7.3e-29	AIS-IDP.1635
rs635634	Vascular or heart problems diagnosed by doctor: high blood pressure	European	4.36e-09	AIS-IDP.1635
rs11066320	Vascular or heart problems diagnosed by doctor: high blood pressure	European	1.57e-16	AIS-IDP.1538
rs3184504	Vascular or heart problems diagnosed by doctor: high blood pressure	European	7.3e-29	AIS-IDP.1538
rs635634	Vascular or heart problems diagnosed by doctor: high blood pressure	European	4.36e-09	AIS-IDP.1538
rs11066320	Vascular or heart problems diagnosed by doctor: high blood pressure	European	1.57e-16	AIS-IDP.2082
rs3184504	Vascular or heart problems diagnosed by doctor: high blood pressure	European	7.3e-29	AIS-IDP.2082
rs635634	Vascular or heart problems diagnosed by doctor: high blood pressure	European	4.36e-09	AIS-IDP.2082
rs11066320	Vascular or heart problems diagnosed by doctor: high blood pressure	European	1.57e-16	AIS-IDP.2095
rs3184504	Vascular or heart problems diagnosed by doctor: high blood pressure	European	7.3e-29	AIS-IDP.2095
rs635634	Vascular or heart problems diagnosed by doctor: high blood pressure	European	4.36e-09	AIS-IDP.2095
rs11066320	Vascular or heart problems diagnosed by doctor: high blood pressure	European	1.57e-16	AIS-IDP.1629
rs3184504	Vascular or heart problems diagnosed by doctor: high blood pressure	European	7.3e-29	AIS-IDP.1629
rs635634	Vascular or heart problems diagnosed by doctor: high blood pressure	European	4.36e-09	AIS-IDP.1629
rs11066320	Vascular or heart problems diagnosed by doctor: high blood pressure	European	1.57e-16	AIS-IDP.2007
rs3184504	Vascular or heart problems diagnosed by doctor: high blood pressure	European	7.3e-29	AIS-IDP.2007
rs635634	Vascular or heart problems diagnosed by doctor: high blood pressure	European	4.36e-09	AIS-IDP.2007
rs11066320	Vascular or heart problems diagnosed by doctor: high blood pressure	European	1.57e-16	AIS-IDP.0349
rs3184504	Vascular or heart problems diagnosed by doctor: high blood pressure	European	7.3e-29	AIS-IDP.0349
rs635634	Vascular or heart problems diagnosed by doctor: high blood pressure	European	4.36e-09	AIS-IDP.0349
rs11066320	Vascular or heart problems diagnosed by doctor: high blood pressure	European	1.57e-16	AIS-IDP.2114
rs3184504	Vascular or heart problems diagnosed by doctor: high blood pressure	European	7.3e-29	AIS-IDP.2114
rs635634	Vascular or heart problems diagnosed by doctor: high blood pressure	European	4.36e-09	AIS-IDP.2114
rs11066320	Vascular or heart problems diagnosed by doctor: high blood pressure	European	1.57e-16	AIS-IDP.1537
rs3184504	Vascular or heart problems diagnosed by doctor: high blood pressure	European	7.3e-29	AIS-IDP.1537
rs635634	Vascular or heart problems diagnosed by doctor: high blood pressure	European	4.36e-09	AIS-IDP.1537
rs11066320	Vascular or heart problems diagnosed by doctor: high blood pressure	European	1.57e-16	AIS-IDP.2084
rs3184504	Vascular or heart problems diagnosed by doctor: high blood pressure	European	7.3e-29	AIS-IDP.2084
rs635634	Vascular or heart problems diagnosed by doctor: high blood pressure	European	4.36e-09	AIS-IDP.2084
rs11066320	Vascular or heart problems diagnosed by doctor: high blood pressure	European	1.57e-16	AIS-IDP.1628
rs3184504	Vascular or heart problems diagnosed by doctor: high blood pressure	European	7.3e-29	AIS-IDP.1628
rs635634	Vascular or heart problems diagnosed by doctor: high blood pressure	European	4.36e-09	AIS-IDP.1628
rs11066320	Vascular or heart problems diagnosed by doctor: high blood pressure	European	1.57e-16	AIS-IDP.1625
rs3184504	Vascular or heart problems diagnosed by doctor: high blood pressure	European	7.3e-29	AIS-IDP.1625
rs635634	Vascular or heart problems diagnosed by doctor: high blood pressure	European	4.36e-09	AIS-IDP.1625
rs11066320	Vascular or heart problems diagnosed by doctor: high blood pressure	European	1.57e-16	AIS-IDP.1817
rs3184504	Vascular or heart problems diagnosed by doctor: high blood pressure	European	7.3e-29	AIS-IDP.1817
rs635634	Vascular or heart problems diagnosed by doctor: high blood pressure	European	4.36e-09	AIS-IDP.1817
rs11066320	Vascular or heart problems diagnosed by doctor: high blood pressure	European	1.57e-16	AIS-IDP.1605
rs3184504	Vascular or heart problems diagnosed by doctor: high blood pressure	European	7.3e-29	AIS-IDP.1605
rs635634	Vascular or heart problems diagnosed by doctor: high blood pressure	European	4.36e-09	AIS-IDP.1605
rs11066320	Vascular or heart problems diagnosed by doctor: high blood pressure	European	1.57e-16	AIS-IDP.2078
rs3184504	Vascular or heart problems diagnosed by doctor: high blood pressure	European	7.3e-29	AIS-IDP.2078
rs635634	Vascular or heart problems diagnosed by doctor: high blood pressure	European	4.36e-09	AIS-IDP.2078
rs11066320	Vascular or heart problems diagnosed by doctor: high blood pressure	European	1.57e-16	AIS-IDP.2094
rs3184504	Vascular or heart problems diagnosed by doctor: high blood pressure	European	7.3e-29	AIS-IDP.2094
rs635634	Vascular or heart problems diagnosed by doctor: high blood pressure	European	4.36e-09	AIS-IDP.2094
rs11066320	Vascular or heart problems diagnosed by doctor: high blood pressure	European	1.57e-16	AIS-IDP.1806
rs3184504	Vascular or heart problems diagnosed by doctor: high blood pressure	European	7.3e-29	AIS-IDP.1806
rs635634	Vascular or heart problems diagnosed by doctor: high blood pressure	European	4.36e-09	AIS-IDP.1806
rs11066320	Vascular or heart problems diagnosed by doctor: high blood pressure	European	1.57e-16	AIS-IDP.1623
rs3184504	Vascular or heart problems diagnosed by doctor: high blood pressure	European	7.3e-29	AIS-IDP.1623
rs635634	Vascular or heart problems diagnosed by doctor: high blood pressure	European	4.36e-09	AIS-IDP.1623
rs11066320	Vascular or heart problems diagnosed by doctor: high blood pressure	European	1.57e-16	AIS-IDP.1645
rs3184504	Vascular or heart problems diagnosed by doctor: high blood pressure	European	7.3e-29	AIS-IDP.1645
rs635634	Vascular or heart problems diagnosed by doctor: high blood pressure	European	4.36e-09	AIS-IDP.1645
rs11066320	Vascular or heart problems diagnosed by doctor: high blood pressure	European	1.57e-16	AIS-IDP.2115
rs3184504	Vascular or heart problems diagnosed by doctor: high blood pressure	European	7.3e-29	AIS-IDP.2115
rs635634	Vascular or heart problems diagnosed by doctor: high blood pressure	European	4.36e-09	AIS-IDP.2115
rs11066320	Vascular or heart problems diagnosed by doctor: high blood pressure	European	1.57e-16	AIS-IDP.1807
rs3184504	Vascular or heart problems diagnosed by doctor: high blood pressure	European	7.3e-29	AIS-IDP.1807
rs635634	Vascular or heart problems diagnosed by doctor: high blood pressure	European	4.36e-09	AIS-IDP.1807
rs11066320	Vascular or heart problems diagnosed by doctor: high blood pressure	European	1.57e-16	AIS-IDP.2111
rs3184504	Vascular or heart problems diagnosed by doctor: high blood pressure	European	7.3e-29	AIS-IDP.2111
rs635634	Vascular or heart problems diagnosed by doctor: high blood pressure	European	4.36e-09	AIS-IDP.2111
rs11066320	Vascular or heart problems diagnosed by doctor: high blood pressure	European	1.57e-16	AIS-IDP.2072
rs3184504	Vascular or heart problems diagnosed by doctor: high blood pressure	European	7.3e-29	AIS-IDP.2072
rs635634	Vascular or heart problems diagnosed by doctor: high blood pressure	European	4.36e-09	AIS-IDP.2072
rs11066320	Vascular or heart problems diagnosed by doctor: high blood pressure	European	1.57e-16	AIS-IDP.1462
rs3184504	Vascular or heart problems diagnosed by doctor: high blood pressure	European	7.3e-29	AIS-IDP.1462
rs635634	Vascular or heart problems diagnosed by doctor: high blood pressure	European	4.36e-09	AIS-IDP.1462
rs11066320	Vascular or heart problems diagnosed by doctor: high blood pressure	European	1.57e-16	AIS-IDP.1624
rs3184504	Vascular or heart problems diagnosed by doctor: high blood pressure	European	7.3e-29	AIS-IDP.1624
rs635634	Vascular or heart problems diagnosed by doctor: high blood pressure	European	4.36e-09	AIS-IDP.1624
rs11066320	Vascular or heart problems diagnosed by doctor: high blood pressure	European	1.57e-16	AIS-IDP.1632
rs3184504	Vascular or heart problems diagnosed by doctor: high blood pressure	European	7.3e-29	AIS-IDP.1632
rs635634	Vascular or heart problems diagnosed by doctor: high blood pressure	European	4.36e-09	AIS-IDP.1632
rs11066320	Vascular or heart problems diagnosed by doctor: high blood pressure	European	1.57e-16	AIS-IDP.1463
rs3184504	Vascular or heart problems diagnosed by doctor: high blood pressure	European	7.3e-29	AIS-IDP.1463
rs635634	Vascular or heart problems diagnosed by doctor: high blood pressure	European	4.36e-09	AIS-IDP.1463
rs11066320	Vascular or heart problems diagnosed by doctor: high blood pressure	European	1.57e-16	AIS-IDP.1620
rs3184504	Vascular or heart problems diagnosed by doctor: high blood pressure	European	7.3e-29	AIS-IDP.1620
rs635634	Vascular or heart problems diagnosed by doctor: high blood pressure	European	4.36e-09	AIS-IDP.1620
rs11066320	Vascular or heart problems diagnosed by doctor: high blood pressure	European	1.57e-16	AIS-IDP.1642
rs3184504	Vascular or heart problems diagnosed by doctor: high blood pressure	European	7.3e-29	AIS-IDP.1642
rs635634	Vascular or heart problems diagnosed by doctor: high blood pressure	European	4.36e-09	AIS-IDP.1642
rs11066320	Vascular or heart problems diagnosed by doctor: high blood pressure	European	1.57e-16	AIS-IDP.1644
rs3184504	Vascular or heart problems diagnosed by doctor: high blood pressure	European	7.3e-29	AIS-IDP.1644
rs635634	Vascular or heart problems diagnosed by doctor: high blood pressure	European	4.36e-09	AIS-IDP.1644
rs11066320	Vascular or heart problems diagnosed by doctor: high blood pressure	European	1.57e-16	AIS-IDP.1818
rs3184504	Vascular or heart problems diagnosed by doctor: high blood pressure	European	7.3e-29	AIS-IDP.1818
rs635634	Vascular or heart problems diagnosed by doctor: high blood pressure	European	4.36e-09	AIS-IDP.1818
rs11066320	Vascular or heart problems diagnosed by doctor: high blood pressure	European	1.57e-16	AIS-IDP.1622
rs3184504	Vascular or heart problems diagnosed by doctor: high blood pressure	European	7.3e-29	AIS-IDP.1622
rs635634	Vascular or heart problems diagnosed by doctor: high blood pressure	European	4.36e-09	AIS-IDP.1622
rs11066320	Vascular or heart problems diagnosed by doctor: high blood pressure	European	1.57e-16	AIS-IDP.1025
rs3184504	Vascular or heart problems diagnosed by doctor: high blood pressure	European	7.3e-29	AIS-IDP.1025
rs635634	Vascular or heart problems diagnosed by doctor: high blood pressure	European	4.36e-09	AIS-IDP.1025
rs11066320	Vascular or heart problems diagnosed by doctor: high blood pressure	European	1.57e-16	AIS-IDP.1557
rs3184504	Vascular or heart problems diagnosed by doctor: high blood pressure	European	7.3e-29	AIS-IDP.1557
rs635634	Vascular or heart problems diagnosed by doctor: high blood pressure	European	4.36e-09	AIS-IDP.1557
rs11066320	Vascular or heart problems diagnosed by doctor: high blood pressure	European	1.57e-16	AIS-IDP.1643
rs3184504	Vascular or heart problems diagnosed by doctor: high blood pressure	European	7.3e-29	AIS-IDP.1643
rs635634	Vascular or heart problems diagnosed by doctor: high blood pressure	European	4.36e-09	AIS-IDP.1643
rs11066320	Vascular or heart problems diagnosed by doctor: high blood pressure	European	1.57e-16	AIS-IDP.1030
rs3184504	Vascular or heart problems diagnosed by doctor: high blood pressure	European	7.3e-29	AIS-IDP.1030
rs635634	Vascular or heart problems diagnosed by doctor: high blood pressure	European	4.36e-09	AIS-IDP.1030
rs11066320	Vascular or heart problems diagnosed by doctor: high blood pressure	European	1.57e-16	AIS-IDP.1561
rs3184504	Vascular or heart problems diagnosed by doctor: high blood pressure	European	7.3e-29	AIS-IDP.1561
rs635634	Vascular or heart problems diagnosed by doctor: high blood pressure	European	4.36e-09	AIS-IDP.1561
rs11066320	Vascular or heart problems diagnosed by doctor: high blood pressure	European	1.57e-16	AIS-IDP.2067
rs3184504	Vascular or heart problems diagnosed by doctor: high blood pressure	European	7.3e-29	AIS-IDP.2067
rs635634	Vascular or heart problems diagnosed by doctor: high blood pressure	European	4.36e-09	AIS-IDP.2067
rs11066320	Vascular or heart problems diagnosed by doctor: high blood pressure	European	1.57e-16	AIS-IDP.1621
rs3184504	Vascular or heart problems diagnosed by doctor: high blood pressure	European	7.3e-29	AIS-IDP.1621
rs635634	Vascular or heart problems diagnosed by doctor: high blood pressure	European	4.36e-09	AIS-IDP.1621
rs11066320	Vascular or heart problems diagnosed by doctor: high blood pressure	European	1.57e-16	AIS-IDP.1606
rs3184504	Vascular or heart problems diagnosed by doctor: high blood pressure	European	7.3e-29	AIS-IDP.1606
rs635634	Vascular or heart problems diagnosed by doctor: high blood pressure	European	4.36e-09	AIS-IDP.1606
rs11066320	Vascular or heart problems diagnosed by doctor: high blood pressure	European	1.57e-16	AIS-IDP.2100
rs3184504	Vascular or heart problems diagnosed by doctor: high blood pressure	European	7.3e-29	AIS-IDP.2100
rs635634	Vascular or heart problems diagnosed by doctor: high blood pressure	European	4.36e-09	AIS-IDP.2100
rs11066320	Vascular or heart problems diagnosed by doctor: high blood pressure	European	1.57e-16	AIS-IDP.1026
rs3184504	Vascular or heart problems diagnosed by doctor: high blood pressure	European	7.3e-29	AIS-IDP.1026
rs635634	Vascular or heart problems diagnosed by doctor: high blood pressure	European	4.36e-09	AIS-IDP.1026
rs11066320	Vascular or heart problems diagnosed by doctor: high blood pressure	European	1.57e-16	AIS-IDP.0394
rs3184504	Vascular or heart problems diagnosed by doctor: high blood pressure	European	7.3e-29	AIS-IDP.0394
rs635634	Vascular or heart problems diagnosed by doctor: high blood pressure	European	4.36e-09	AIS-IDP.0394
rs11066320	Vascular or heart problems diagnosed by doctor: high blood pressure	European	1.57e-16	AIS-IDP.2066
rs3184504	Vascular or heart problems diagnosed by doctor: high blood pressure	European	7.3e-29	AIS-IDP.2066
rs635634	Vascular or heart problems diagnosed by doctor: high blood pressure	European	4.36e-09	AIS-IDP.2066
rs11066320	Vascular or heart problems diagnosed by doctor: high blood pressure	European	1.57e-16	AIS-IDP.2028
rs3184504	Vascular or heart problems diagnosed by doctor: high blood pressure	European	7.3e-29	AIS-IDP.2028
rs635634	Vascular or heart problems diagnosed by doctor: high blood pressure	European	4.36e-09	AIS-IDP.2028
rs11066320	Vascular or heart problems diagnosed by doctor: high blood pressure	European	1.57e-16	AIS-IDP.1809
rs3184504	Vascular or heart problems diagnosed by doctor: high blood pressure	European	7.3e-29	AIS-IDP.1809
rs635634	Vascular or heart problems diagnosed by doctor: high blood pressure	European	4.36e-09	AIS-IDP.1809
rs11066320	Vascular or heart problems diagnosed by doctor: high blood pressure	European	1.57e-16	AIS-IDP.1558
rs3184504	Vascular or heart problems diagnosed by doctor: high blood pressure	European	7.3e-29	AIS-IDP.1558
rs635634	Vascular or heart problems diagnosed by doctor: high blood pressure	European	4.36e-09	AIS-IDP.1558
rs11066320	Vascular or heart problems diagnosed by doctor: high blood pressure	European	1.57e-16	AIS-IDP.2060
rs3184504	Vascular or heart problems diagnosed by doctor: high blood pressure	European	7.3e-29	AIS-IDP.2060
rs635634	Vascular or heart problems diagnosed by doctor: high blood pressure	European	4.36e-09	AIS-IDP.2060
rs11066320	Vascular or heart problems diagnosed by doctor: high blood pressure	European	1.57e-16	AIS-IDP.1469
rs3184504	Vascular or heart problems diagnosed by doctor: high blood pressure	European	7.3e-29	AIS-IDP.1469
rs635634	Vascular or heart problems diagnosed by doctor: high blood pressure	European	4.36e-09	AIS-IDP.1469
rs11066320	Vascular or heart problems diagnosed by doctor: high blood pressure	European	1.57e-16	AIS-IDP.1648
rs3184504	Vascular or heart problems diagnosed by doctor: high blood pressure	European	7.3e-29	AIS-IDP.1648
rs635634	Vascular or heart problems diagnosed by doctor: high blood pressure	European	4.36e-09	AIS-IDP.1648
rs11066320	Vascular or heart problems diagnosed by doctor: high blood pressure	European	1.57e-16	AIS-IDP.1805
rs3184504	Vascular or heart problems diagnosed by doctor: high blood pressure	European	7.3e-29	AIS-IDP.1805
rs635634	Vascular or heart problems diagnosed by doctor: high blood pressure	European	4.36e-09	AIS-IDP.1805
rs11066320	Vascular or heart problems diagnosed by doctor: high blood pressure	European	1.57e-16	AIS-IDP.2101
rs3184504	Vascular or heart problems diagnosed by doctor: high blood pressure	European	7.3e-29	AIS-IDP.2101
rs635634	Vascular or heart problems diagnosed by doctor: high blood pressure	European	4.36e-09	AIS-IDP.2101
rs11066320	Vascular or heart problems diagnosed by doctor: high blood pressure	European	1.57e-16	AIS-IDP.1998
rs3184504	Vascular or heart problems diagnosed by doctor: high blood pressure	European	7.3e-29	AIS-IDP.1998
rs635634	Vascular or heart problems diagnosed by doctor: high blood pressure	European	4.36e-09	AIS-IDP.1998
rs11066320	Vascular or heart problems diagnosed by doctor: high blood pressure	European	1.57e-16	AIS-IDP.1562
rs3184504	Vascular or heart problems diagnosed by doctor: high blood pressure	European	7.3e-29	AIS-IDP.1562
rs635634	Vascular or heart problems diagnosed by doctor: high blood pressure	European	4.36e-09	AIS-IDP.1562
rs11066320	Vascular or heart problems diagnosed by doctor: high blood pressure	European	1.57e-16	AIS-IDP.2008
rs3184504	Vascular or heart problems diagnosed by doctor: high blood pressure	European	7.3e-29	AIS-IDP.2008
rs635634	Vascular or heart problems diagnosed by doctor: high blood pressure	European	4.36e-09	AIS-IDP.2008
rs11066320	Vascular or heart problems diagnosed by doctor: high blood pressure	European	1.57e-16	AIS-IDP.1808
rs3184504	Vascular or heart problems diagnosed by doctor: high blood pressure	European	7.3e-29	AIS-IDP.1808
rs635634	Vascular or heart problems diagnosed by doctor: high blood pressure	European	4.36e-09	AIS-IDP.1808
rs11066320	Vascular or heart problems diagnosed by doctor: high blood pressure	European	1.57e-16	AIS-IDP.1489
rs3184504	Vascular or heart problems diagnosed by doctor: high blood pressure	European	7.3e-29	AIS-IDP.1489
rs635634	Vascular or heart problems diagnosed by doctor: high blood pressure	European	4.36e-09	AIS-IDP.1489
rs11066320	Vascular or heart problems diagnosed by doctor: high blood pressure	European	1.57e-16	AIS-IDP.1488
rs3184504	Vascular or heart problems diagnosed by doctor: high blood pressure	European	7.3e-29	AIS-IDP.1488
rs635634	Vascular or heart problems diagnosed by doctor: high blood pressure	European	4.36e-09	AIS-IDP.1488
rs11066320	Vascular or heart problems diagnosed by doctor: high blood pressure	European	1.57e-16	AIS-IDP.2086
rs3184504	Vascular or heart problems diagnosed by doctor: high blood pressure	European	7.3e-29	AIS-IDP.2086
rs635634	Vascular or heart problems diagnosed by doctor: high blood pressure	European	4.36e-09	AIS-IDP.2086
rs11066320	Vascular or heart problems diagnosed by doctor: high blood pressure	European	1.57e-16	AIS-IDP.1637
rs3184504	Vascular or heart problems diagnosed by doctor: high blood pressure	European	7.3e-29	AIS-IDP.1637
rs635634	Vascular or heart problems diagnosed by doctor: high blood pressure	European	4.36e-09	AIS-IDP.1637
rs11066320	Vascular or heart problems diagnosed by doctor: high blood pressure	European	1.57e-16	AIS-IDP.1633
rs3184504	Vascular or heart problems diagnosed by doctor: high blood pressure	European	7.3e-29	AIS-IDP.1633
rs635634	Vascular or heart problems diagnosed by doctor: high blood pressure	European	4.36e-09	AIS-IDP.1633
rs11066320	Vascular or heart problems diagnosed by doctor: high blood pressure	European	1.57e-16	AIS-IDP.2087
rs3184504	Vascular or heart problems diagnosed by doctor: high blood pressure	European	7.3e-29	AIS-IDP.2087
rs635634	Vascular or heart problems diagnosed by doctor: high blood pressure	European	4.36e-09	AIS-IDP.2087
rs11066320	Vascular or heart problems diagnosed by doctor: high blood pressure	European	1.57e-16	AIS-IDP.2110
rs3184504	Vascular or heart problems diagnosed by doctor: high blood pressure	European	7.3e-29	AIS-IDP.2110
rs635634	Vascular or heart problems diagnosed by doctor: high blood pressure	European	4.36e-09	AIS-IDP.2110
rs11066320	Vascular or heart problems diagnosed by doctor: high blood pressure	European	1.57e-16	AIS-IDP.2056
rs3184504	Vascular or heart problems diagnosed by doctor: high blood pressure	European	7.3e-29	AIS-IDP.2056
rs635634	Vascular or heart problems diagnosed by doctor: high blood pressure	European	4.36e-09	AIS-IDP.2056
rs11066320	Vascular or heart problems diagnosed by doctor: high blood pressure	European	1.57e-16	AIS-IDP.1617
rs3184504	Vascular or heart problems diagnosed by doctor: high blood pressure	European	7.3e-29	AIS-IDP.1617
rs635634	Vascular or heart problems diagnosed by doctor: high blood pressure	European	4.36e-09	AIS-IDP.1617
rs11066320	Vascular or heart problems diagnosed by doctor: high blood pressure	European	1.57e-16	AIS-IDP.1543
rs3184504	Vascular or heart problems diagnosed by doctor: high blood pressure	European	7.3e-29	AIS-IDP.1543
rs635634	Vascular or heart problems diagnosed by doctor: high blood pressure	European	4.36e-09	AIS-IDP.1543
rs11066320	Vascular or heart problems diagnosed by doctor: high blood pressure	European	1.57e-16	AIS-IDP.1948
rs3184504	Vascular or heart problems diagnosed by doctor: high blood pressure	European	7.3e-29	AIS-IDP.1948
rs635634	Vascular or heart problems diagnosed by doctor: high blood pressure	European	4.36e-09	AIS-IDP.1948
rs11066320	Vascular or heart problems diagnosed by doctor: high blood pressure	European	1.57e-16	AIS-IDP.2003
rs3184504	Vascular or heart problems diagnosed by doctor: high blood pressure	European	7.3e-29	AIS-IDP.2003
rs635634	Vascular or heart problems diagnosed by doctor: high blood pressure	European	4.36e-09	AIS-IDP.2003
rs11066320	Vascular or heart problems diagnosed by doctor: high blood pressure	European	1.57e-16	AIS-IDP.2014
rs3184504	Vascular or heart problems diagnosed by doctor: high blood pressure	European	7.3e-29	AIS-IDP.2014
rs635634	Vascular or heart problems diagnosed by doctor: high blood pressure	European	4.36e-09	AIS-IDP.2014
rs11066320	Vascular or heart problems diagnosed by doctor: high blood pressure	European	1.57e-16	AIS-IDP.1477
rs3184504	Vascular or heart problems diagnosed by doctor: high blood pressure	European	7.3e-29	AIS-IDP.1477
rs635634	Vascular or heart problems diagnosed by doctor: high blood pressure	European	4.36e-09	AIS-IDP.1477
rs11066320	Vascular or heart problems diagnosed by doctor: high blood pressure	European	1.57e-16	AIS-IDP.1481
rs3184504	Vascular or heart problems diagnosed by doctor: high blood pressure	European	7.3e-29	AIS-IDP.1481
rs635634	Vascular or heart problems diagnosed by doctor: high blood pressure	European	4.36e-09	AIS-IDP.1481
rs11066320	Vascular or heart problems diagnosed by doctor: high blood pressure	European	1.57e-16	AIS-IDP.2009
rs3184504	Vascular or heart problems diagnosed by doctor: high blood pressure	European	7.3e-29	AIS-IDP.2009
rs635634	Vascular or heart problems diagnosed by doctor: high blood pressure	European	4.36e-09	AIS-IDP.2009
rs11066320	Vascular or heart problems diagnosed by doctor: high blood pressure	European	1.57e-16	AIS-IDP.2004
rs3184504	Vascular or heart problems diagnosed by doctor: high blood pressure	European	7.3e-29	AIS-IDP.2004
rs635634	Vascular or heart problems diagnosed by doctor: high blood pressure	European	4.36e-09	AIS-IDP.2004
rs11066320	Vascular or heart problems diagnosed by doctor: high blood pressure	European	1.57e-16	AIS-IDP.1523
rs3184504	Vascular or heart problems diagnosed by doctor: high blood pressure	European	7.3e-29	AIS-IDP.1523
rs635634	Vascular or heart problems diagnosed by doctor: high blood pressure	European	4.36e-09	AIS-IDP.1523
rs11066320	Vascular or heart problems diagnosed by doctor: high blood pressure	European	1.57e-16	AIS-IDP.0014
rs3184504	Vascular or heart problems diagnosed by doctor: high blood pressure	European	7.3e-29	AIS-IDP.0014
rs635634	Vascular or heart problems diagnosed by doctor: high blood pressure	European	4.36e-09	AIS-IDP.0014
rs11066320	Vascular or heart problems diagnosed by doctor: high blood pressure	European	1.57e-16	AIS-IDP.0387
rs3184504	Vascular or heart problems diagnosed by doctor: high blood pressure	European	7.3e-29	AIS-IDP.0387
rs635634	Vascular or heart problems diagnosed by doctor: high blood pressure	European	4.36e-09	AIS-IDP.0387
rs11066320	Vascular or heart problems diagnosed by doctor: high blood pressure	European	1.57e-16	AIS-IDP.1794
rs3184504	Vascular or heart problems diagnosed by doctor: high blood pressure	European	7.3e-29	AIS-IDP.1794
rs635634	Vascular or heart problems diagnosed by doctor: high blood pressure	European	4.36e-09	AIS-IDP.1794
rs11066320	Vascular or heart problems diagnosed by doctor: high blood pressure	European	1.57e-16	AIS-IDP.1044
rs3184504	Vascular or heart problems diagnosed by doctor: high blood pressure	European	7.3e-29	AIS-IDP.1044
rs635634	Vascular or heart problems diagnosed by doctor: high blood pressure	European	4.36e-09	AIS-IDP.1044
rs11066320	Vascular or heart problems diagnosed by doctor: high blood pressure	European	1.57e-16	AIS-IDP.0671
rs3184504	Vascular or heart problems diagnosed by doctor: high blood pressure	European	7.3e-29	AIS-IDP.0671
rs635634	Vascular or heart problems diagnosed by doctor: high blood pressure	European	4.36e-09	AIS-IDP.0671
rs11066320	Vascular or heart problems diagnosed by doctor: high blood pressure	European	1.57e-16	AIS-IDP.1021
rs3184504	Vascular or heart problems diagnosed by doctor: high blood pressure	European	7.3e-29	AIS-IDP.1021
rs635634	Vascular or heart problems diagnosed by doctor: high blood pressure	European	4.36e-09	AIS-IDP.1021
rs11066320	Vascular or heart problems diagnosed by doctor: high blood pressure	European	1.57e-16	AIS-IDP.1928
rs3184504	Vascular or heart problems diagnosed by doctor: high blood pressure	European	7.3e-29	AIS-IDP.1928
rs635634	Vascular or heart problems diagnosed by doctor: high blood pressure	European	4.36e-09	AIS-IDP.1928
rs11066320	Vascular or heart problems diagnosed by doctor: high blood pressure	European	1.57e-16	AIS-IDP.2063
rs3184504	Vascular or heart problems diagnosed by doctor: high blood pressure	European	7.3e-29	AIS-IDP.2063
rs635634	Vascular or heart problems diagnosed by doctor: high blood pressure	European	4.36e-09	AIS-IDP.2063
rs11066320	Vascular or heart problems diagnosed by doctor: high blood pressure	European	1.57e-16	AIS-IDP.1474
rs3184504	Vascular or heart problems diagnosed by doctor: high blood pressure	European	7.3e-29	AIS-IDP.1474
rs635634	Vascular or heart problems diagnosed by doctor: high blood pressure	European	4.36e-09	AIS-IDP.1474
rs11066320	Vascular or heart problems diagnosed by doctor: high blood pressure	European	1.57e-16	AIS-IDP.1498
rs3184504	Vascular or heart problems diagnosed by doctor: high blood pressure	European	7.3e-29	AIS-IDP.1498
rs635634	Vascular or heart problems diagnosed by doctor: high blood pressure	European	4.36e-09	AIS-IDP.1498
rs10774624	Vascular or heart problems diagnosed by doctor: high blood pressure	European	4.71e-24	AS-IDP.2068
rs10774624	Vascular or heart problems diagnosed by doctor: high blood pressure	European	4.71e-24	AS-IDP.2076
rs10774624	Vascular or heart problems diagnosed by doctor: high blood pressure	European	4.71e-24	AS-IDP.2077
rs10774624	Vascular or heart problems diagnosed by doctor: high blood pressure	European	4.71e-24	AS-IDP.2069
rs10774624	Vascular or heart problems diagnosed by doctor: high blood pressure	European	4.71e-24	AS-IDP.2075
rs10774624	Vascular or heart problems diagnosed by doctor: high blood pressure	European	4.71e-24	AS-IDP.2074
rs10774624	Vascular or heart problems diagnosed by doctor: high blood pressure	European	4.71e-24	AS-IDP.1618
rs10774624	Vascular or heart problems diagnosed by doctor: high blood pressure	European	4.71e-24	AS-IDP.1619
rs10774624	Vascular or heart problems diagnosed by doctor: high blood pressure	European	4.71e-24	AS-IDP.2102
rs10774624	Vascular or heart problems diagnosed by doctor: high blood pressure	European	4.71e-24	AS-IDP.2103
rs10774624	Vascular or heart problems diagnosed by doctor: high blood pressure	European	4.71e-24	AS-IDP.0179
rs10774624	Vascular or heart problems diagnosed by doctor: high blood pressure	European	4.71e-24	AS-IDP.2124
rs10774624	Vascular or heart problems diagnosed by doctor: high blood pressure	European	4.71e-24	AS-IDP.1468
rs10774624	Vascular or heart problems diagnosed by doctor: high blood pressure	European	4.71e-24	AS-IDP.1796
rs10774624	Vascular or heart problems diagnosed by doctor: high blood pressure	European	4.71e-24	AS-IDP.2123
rs10774624	Vascular or heart problems diagnosed by doctor: high blood pressure	European	4.71e-24	AS-IDP.2081
rs10774624	Vascular or heart problems diagnosed by doctor: high blood pressure	European	4.71e-24	AS-IDP.2093
rs10774624	Vascular or heart problems diagnosed by doctor: high blood pressure	European	4.71e-24	AS-IDP.1627
rs10774624	Vascular or heart problems diagnosed by doctor: high blood pressure	European	4.71e-24	AS-IDP.2079
rs10774624	Vascular or heart problems diagnosed by doctor: high blood pressure	European	4.71e-24	AS-IDP.2080
rs10774624	Vascular or heart problems diagnosed by doctor: high blood pressure	European	4.71e-24	AS-IDP.1626
rs10774624	Vascular or heart problems diagnosed by doctor: high blood pressure	European	4.71e-24	AS-IDP.1634
rs10774624	Vascular or heart problems diagnosed by doctor: high blood pressure	European	4.71e-24	AS-IDP.2071
rs10774624	Vascular or heart problems diagnosed by doctor: high blood pressure	European	4.71e-24	AS-IDP.1797
rs10774624	Vascular or heart problems diagnosed by doctor: high blood pressure	European	4.71e-24	AS-IDP.2085
rs10774624	Vascular or heart problems diagnosed by doctor: high blood pressure	European	4.71e-24	AS-IDP.1988
rs10774624	Vascular or heart problems diagnosed by doctor: high blood pressure	European	4.71e-24	AS-IDP.1629
rs10774624	Vascular or heart problems diagnosed by doctor: high blood pressure	European	4.71e-24	AS-IDP.2092
rs10774624	Vascular or heart problems diagnosed by doctor: high blood pressure	European	4.71e-24	AS-IDP.1635
rs10774624	Vascular or heart problems diagnosed by doctor: high blood pressure	European	4.71e-24	AS-IDP.1625
rs10774624	Vascular or heart problems diagnosed by doctor: high blood pressure	European	4.71e-24	AS-IDP.1620
rs10774624	Vascular or heart problems diagnosed by doctor: high blood pressure	European	4.71e-24	AS-IDP.2112
rs10774624	Vascular or heart problems diagnosed by doctor: high blood pressure	European	4.71e-24	AS-IDP.1631
rs10774624	Vascular or heart problems diagnosed by doctor: high blood pressure	European	4.71e-24	AS-IDP.1644
rs10774624	Vascular or heart problems diagnosed by doctor: high blood pressure	European	4.71e-24	AS-IDP.1605
rs10774624	Vascular or heart problems diagnosed by doctor: high blood pressure	European	4.71e-24	AS-IDP.1630
rs10774624	Vascular or heart problems diagnosed by doctor: high blood pressure	European	4.71e-24	AS-IDP.1987
rs10774624	Vascular or heart problems diagnosed by doctor: high blood pressure	European	4.71e-24	AS-IDP.2094
rs10774624	Vascular or heart problems diagnosed by doctor: high blood pressure	European	4.71e-24	AS-IDP.2070
rs10774624	Vascular or heart problems diagnosed by doctor: high blood pressure	European	4.71e-24	AS-IDP.2095
rs10774624	Vascular or heart problems diagnosed by doctor: high blood pressure	European	4.71e-24	AS-IDP.1628
rs10774624	Vascular or heart problems diagnosed by doctor: high blood pressure	European	4.71e-24	AS-IDP.2055
rs10774624	Vascular or heart problems diagnosed by doctor: high blood pressure	European	4.71e-24	AS-IDP.2084
rs10774624	Vascular or heart problems diagnosed by doctor: high blood pressure	European	4.71e-24	AS-IDP.1807
rs10774624	Vascular or heart problems diagnosed by doctor: high blood pressure	European	4.71e-24	AS-IDP.1645
rs10774624	Vascular or heart problems diagnosed by doctor: high blood pressure	European	4.71e-24	AS-IDP.1817
rs10774624	Vascular or heart problems diagnosed by doctor: high blood pressure	European	4.71e-24	AS-IDP.2073
rs10774624	Vascular or heart problems diagnosed by doctor: high blood pressure	European	4.71e-24	AS-IDP.1806
rs10774624	Vascular or heart problems diagnosed by doctor: high blood pressure	European	4.71e-24	AS-IDP.2082
rs10774624	Vascular or heart problems diagnosed by doctor: high blood pressure	European	4.71e-24	AS-IDP.1624
rs10774624	Vascular or heart problems diagnosed by doctor: high blood pressure	European	4.71e-24	AS-IDP.2113
rs10774624	Vascular or heart problems diagnosed by doctor: high blood pressure	European	4.71e-24	AS-IDP.2078
rs10774624	Vascular or heart problems diagnosed by doctor: high blood pressure	European	4.71e-24	AS-IDP.2111
rs10774624	Vascular or heart problems diagnosed by doctor: high blood pressure	European	4.71e-24	AS-IDP.1632
rs10774624	Vascular or heart problems diagnosed by doctor: high blood pressure	European	4.71e-24	AS-IDP.1469
rs10774624	Vascular or heart problems diagnosed by doctor: high blood pressure	European	4.71e-24	AS-IDP.1463
rs10774624	Vascular or heart problems diagnosed by doctor: high blood pressure	European	4.71e-24	AS-IDP.1805
rs10774624	Vascular or heart problems diagnosed by doctor: high blood pressure	European	4.71e-24	AS-IDP.1818
rs10774624	Vascular or heart problems diagnosed by doctor: high blood pressure	European	4.71e-24	AS-IDP.2114
rs10774624	Vascular or heart problems diagnosed by doctor: high blood pressure	European	4.71e-24	AS-IDP.1623
rs10774624	Vascular or heart problems diagnosed by doctor: high blood pressure	European	4.71e-24	AS-IDP.1642
rs10774624	Vascular or heart problems diagnosed by doctor: high blood pressure	European	4.71e-24	AS-IDP.1621
rs10774624	Vascular or heart problems diagnosed by doctor: high blood pressure	European	4.71e-24	AS-IDP.1462
rs10774624	Vascular or heart problems diagnosed by doctor: high blood pressure	European	4.71e-24	AS-IDP.1643
rs10774624	Vascular or heart problems diagnosed by doctor: high blood pressure	European	4.71e-24	AS-IDP.1622
rs10774624	Vascular or heart problems diagnosed by doctor: high blood pressure	European	4.71e-24	AS-IDP.1537
rs10774624	Vascular or heart problems diagnosed by doctor: high blood pressure	European	4.71e-24	AS-IDP.1538
rs10774624	Vascular or heart problems diagnosed by doctor: high blood pressure	European	4.71e-24	AS-IDP.2072
rs10774624	Vascular or heart problems diagnosed by doctor: high blood pressure	European	4.71e-24	AS-IDP.2115
rs10774624	Vascular or heart problems diagnosed by doctor: high blood pressure	European	4.71e-24	AS-IDP.2007
rs10774624	Vascular or heart problems diagnosed by doctor: high blood pressure	European	4.71e-24	AS-IDP.1809
rs10774624	Vascular or heart problems diagnosed by doctor: high blood pressure	European	4.71e-24	AS-IDP.1474
rs10774624	Vascular or heart problems diagnosed by doctor: high blood pressure	European	4.71e-24	AS-IDP.1808
rs10774624	Vascular or heart problems diagnosed by doctor: high blood pressure	European	4.71e-24	AS-IDP.1637
rs10774624	Vascular or heart problems diagnosed by doctor: high blood pressure	European	4.71e-24	AS-IDP.1477
rs10774624	Vascular or heart problems diagnosed by doctor: high blood pressure	European	4.71e-24	AS-IDP.1481
rs10774624	Vascular or heart problems diagnosed by doctor: high blood pressure	European	4.71e-24	AS-IDP.0014
rs10774624	Vascular or heart problems diagnosed by doctor: high blood pressure	European	4.71e-24	AS-IDP.2004
rs10774624	Vascular or heart problems diagnosed by doctor: high blood pressure	European	4.71e-24	AS-IDP.1633
rs10774624	Vascular or heart problems diagnosed by doctor: high blood pressure	European	4.71e-24	AS-IDP.1502
rs10774624	Vascular or heart problems diagnosed by doctor: high blood pressure	European	4.71e-24	AS-IDP.1929
rs10774624	Vascular or heart problems diagnosed by doctor: high blood pressure	European	4.71e-24	AS-IDP.1543
rs10774624	Vascular or heart problems diagnosed by doctor: high blood pressure	European	4.71e-24	AS-IDP.1561
rs10774624	Vascular or heart problems diagnosed by doctor: high blood pressure	European	4.71e-24	AS-IDP.1604
rs10774624	Vascular or heart problems diagnosed by doctor: high blood pressure	European	4.71e-24	AS-IDP.1928
rs10774624	Vascular or heart problems diagnosed by doctor: high blood pressure	European	4.71e-24	AS-IDP.1606
rs10774624	Vascular or heart problems diagnosed by doctor: high blood pressure	European	4.71e-24	AS-IDP.1480
rs10774624	Vascular or heart problems diagnosed by doctor: high blood pressure	European	4.71e-24	AS-IDP.1025
rs10774624	Vascular or heart problems diagnosed by doctor: high blood pressure	European	4.71e-24	AS-IDP.1476
rs10774624	Vascular or heart problems diagnosed by doctor: high blood pressure	European	4.71e-24	AS-IDP.2066
rs10774624	Vascular or heart problems diagnosed by doctor: high blood pressure	European	4.71e-24	AS-IDP.1503
rs10774624	Vascular or heart problems diagnosed by doctor: high blood pressure	European	4.71e-24	AS-IDP.2100
rs10774624	Vascular or heart problems diagnosed by doctor: high blood pressure	European	4.71e-24	AS-IDP.2086
rs10774624	Vascular or heart problems diagnosed by doctor: high blood pressure	European	4.71e-24	AS-IDP.1523
rs10774624	Vascular or heart problems diagnosed by doctor: high blood pressure	European	4.71e-24	AS-IDP.2060
rs10774624	Vascular or heart problems diagnosed by doctor: high blood pressure	European	4.71e-24	AS-IDP.1460
rs10774624	Vascular or heart problems diagnosed by doctor: high blood pressure	European	4.71e-24	AS-IDP.1479
rs10774624	Vascular or heart problems diagnosed by doctor: high blood pressure	European	4.71e-24	AS-IDP.2028
rs10774624	Vascular or heart problems diagnosed by doctor: high blood pressure	European	4.71e-24	AS-IDP.2067
rs10774624	Vascular or heart problems diagnosed by doctor: high blood pressure	European	4.71e-24	AS-IDP.2101
rs10774624	Vascular or heart problems diagnosed by doctor: high blood pressure	European	4.71e-24	AS-IDP.1648
rs10774624	Vascular or heart problems diagnosed by doctor: high blood pressure	European	4.71e-24	AS-IDP.1948
rs10774624	Vascular or heart problems diagnosed by doctor: high blood pressure	European	4.71e-24	AS-IDP.2087
rs10774624	Vascular or heart problems diagnosed by doctor: high blood pressure	European	4.71e-24	AS-IDP.1927
rs10774624	Vascular or heart problems diagnosed by doctor: high blood pressure	European	4.71e-24	AS-IDP.1466
rs10774624	Vascular or heart problems diagnosed by doctor: high blood pressure	European	4.71e-24	AS-IDP.2003
rs10774624	Vascular or heart problems diagnosed by doctor: high blood pressure	European	4.71e-24	AS-IDP.0021
rs10774624	Vascular or heart problems diagnosed by doctor: high blood pressure	European	4.71e-24	AS-IDP.1484
rs10774624	Vascular or heart problems diagnosed by doctor: high blood pressure	European	4.71e-24	AS-IDP.1557
rs10774624	Vascular or heart problems diagnosed by doctor: high blood pressure	European	4.71e-24	AS-IDP.1488
rs10774624	Vascular or heart problems diagnosed by doctor: high blood pressure	European	4.71e-24	AS-IDP.1794
rs10774624	Vascular or heart problems diagnosed by doctor: high blood pressure	European	4.71e-24	AS-IDP.1470
rs10774624	Vascular or heart problems diagnosed by doctor: high blood pressure	European	4.71e-24	AS-IDP.1515
rs10774624	Vascular or heart problems diagnosed by doctor: high blood pressure	European	4.71e-24	AS-IDP.2058
rs10774624	Vascular or heart problems diagnosed by doctor: high blood pressure	European	4.71e-24	AS-IDP.1931
rs10774624	Vascular or heart problems diagnosed by doctor: high blood pressure	European	4.71e-24	AS-IDP.0349
rs10774624	Vascular or heart problems diagnosed by doctor: high blood pressure	European	4.71e-24	AS-IDP.1471
rs10774624	Vascular or heart problems diagnosed by doctor: high blood pressure	European	4.71e-24	AS-IDP.1795
rs10774624	Vascular or heart problems diagnosed by doctor: high blood pressure	European	4.71e-24	AS-IDP.0671
rs10774624	Vascular or heart problems diagnosed by doctor: high blood pressure	European	4.71e-24	AS-IDP.1636
rs10774624	Vascular or heart problems diagnosed by doctor: high blood pressure	European	4.71e-24	AS-IDP.1026
rs10774624	Vascular or heart problems diagnosed by doctor: high blood pressure	European	4.71e-24	AS-IDP.2054
rs10774624	Vascular or heart problems diagnosed by doctor: high blood pressure	European	4.71e-24	AS-IDP.1511
rs10774624	Vascular or heart problems diagnosed by doctor: high blood pressure	European	4.71e-24	AS-IDP.1045
rs10774624	Vascular or heart problems diagnosed by doctor: high blood pressure	European	4.71e-24	AS-IDP.2009
rs10774624	Vascular or heart problems diagnosed by doctor: high blood pressure	European	4.71e-24	AS-IDP.1498
rs10774624	Vascular or heart problems diagnosed by doctor: high blood pressure	European	4.71e-24	AS-IDP.1930
rs10774624	Vascular or heart problems diagnosed by doctor: high blood pressure	European	4.71e-24	AS-IDP.1991
rs10774624	Vascular or heart problems diagnosed by doctor: high blood pressure	European	4.71e-24	AS-IDP.1562
rs10774624	Vascular or heart problems diagnosed by doctor: high blood pressure	European	4.71e-24	AS-IDP.1945
rs10774624	Vascular or heart problems diagnosed by doctor: high blood pressure	European	4.71e-24	AS-IDP.2063
rs10774624	Vascular or heart problems diagnosed by doctor: high blood pressure	European	4.71e-24	AS-IDP.1926
rs10774624	Vascular or heart problems diagnosed by doctor: high blood pressure	European	4.71e-24	AS-IDP.1949
rs10774624	Vascular or heart problems diagnosed by doctor: high blood pressure	European	4.71e-24	AS-IDP.1494
rs10774624	Vascular or heart problems diagnosed by doctor: high blood pressure	European	4.71e-24	AS-IDP.0394
rs10774624	Vascular or heart problems diagnosed by doctor: high blood pressure	European	4.71e-24	AS-IDP.2056
rs10774624	Vascular or heart problems diagnosed by doctor: high blood pressure	European	4.71e-24	AS-IDP.0693
rs10774624	Vascular or heart problems diagnosed by doctor: high blood pressure	European	4.71e-24	AS-IDP.1485
rs10774624	Vascular or heart problems diagnosed by doctor: high blood pressure	European	4.71e-24	AS-IDP.1617

## Sheet: Table S7
Table S7: The information of IVs for all exposure-outcome pairs in forward MR
Exposure (IDP)	IDP ID	Outcome (Disorder)	IVs N	IVs	Exposure variance explained	Outcome variance explained	Correct causal direction	steiger P	F-statistic	Odds ratio at 80% power (5% error rate )
MD in the anterior limb of the right internal capsule	IDP.1618	AS	12	rs7923885,rs7923885,rs7923885,rs7923885,rs7923885,rs7923885,rs7923885,rs7923885,rs7923885,rs7923885,rs7923885,rs7923885	0.0183557	0.000791921	TRUE	6.09091e-58	48.8359	1.11368	0.897922
MD in the right external capsule	IDP.1634	SVS	10	rs9943229,rs9943229,rs9943229,rs9943229,rs9943229,rs9943229,rs9943229,rs9943229,rs9943229,rs9943229	0.0132796	0.00542768	TRUE	0.000188749	42.1823	1.39602	0.71632
MD in the anterior limb of the right internal capsule	IDP.1618	AIS	13	rs7923885,rs7923885,rs7923885,rs7923885,rs7923885,rs7923885,rs7923885,rs7923885,rs7923885,rs7923885,rs7923885,rs7923885,rs7923885	0.019607	0.000739924	TRUE	6.95835e-61	48.2121	1.11922	0.893483
MD in the right superior fronto-occipital fasciculus	IDP.1644	AS	10	rs9515201,rs9515201,rs9515201,rs9515201,rs9515201,rs9515201,rs9515201,rs9515201,rs9515201,rs9515201	0.0170291	0.000660528	TRUE	3.06524e-55	54.2993	1.11827	0.894236
MD in the anterior limb of the left internal capsule	IDP.1619	AS	13	rs9515201,rs9515201,rs9515201,rs9515201,rs9515201,rs9515201,rs9515201,rs9515201,rs9515201,rs9515201,rs9515201,rs9515201,rs9515201	0.0185901	0.000616259	TRUE	2.21379e-62	45.6653	1.11292	0.898535
MD in the right superior fronto-occipital fasciculus	IDP.1644	SVS	8	rs6484437,rs6484437,rs6484437,rs6484437,rs6484437,rs6484437,rs6484437,rs6484437	0.0149493	0.00430732	TRUE	3.62343e-07	59.4629	1.3695	0.730196
MD in the anterior limb of the left internal capsule	IDP.1619	SVS	14	rs7314654,rs7314654,rs7314654,rs7314654,rs7314654,rs7314654,rs7314654,rs7314654,rs7314654,rs7314654,rs7314654,rs7314654,rs7314654,rs7314654	0.019243	0.0060235	TRUE	3.67938e-08	43.9207	1.31937	0.75794
MD in the left superior fronto-occipital fasciculus	IDP.1645	AS	9	rs7733216,rs7733216,rs7733216,rs7733216,rs7733216,rs7733216,rs7733216,rs7733216,rs7733216	0.0140881	0.000557295	TRUE	1.09359e-45	49.7652	1.13077	0.884351
ISOVF in the anterior limb of the left internal capsule	IDP.2069	AS	8	rs72976977,rs72976977,rs72976977,rs72976977,rs72976977,rs72976977,rs72976977,rs72976977	0.00962319	0.000467283	TRUE	4.6196e-30	38.0695	1.16033	0.861823
MD in the left superior corona radiata	IDP.1627	CES	24	rs9521686,rs9521686,rs9521686,rs9521686,rs9521686,rs9521686,rs9521686,rs9521686,rs9521686,rs9521686,rs9521686,rs9521686,rs9521686,rs9521686,rs9521686,rs9521686,rs9521686,rs9521686,rs9521686,rs9521686,rs9521686,rs9521686,rs9521686,rs9521686	0.0355727	0.00317793	TRUE	3.96233e-40	48.147	1.1937	0.837728
MD in the anterior limb of the right internal capsule	IDP.1618	SVS	15	rs9112,rs9112,rs9112,rs9112,rs9112,rs9112,rs9112,rs9112,rs9112,rs9112,rs9112,rs9112,rs9112,rs9112,rs9112	0.0216781	0.00548458	TRUE	4.18002e-11	46.2931	1.29839	0.770186
ISOVF in the right posterior corona radiata	IDP.2078	AS	8	rs9739560,rs9739560,rs9739560,rs9739560,rs9739560,rs9739560,rs9739560,rs9739560	0.0134412	0.000397017	TRUE	1.66252e-46	53.3794	1.13408	0.881769
MD in the right superior fronto-occipital fasciculus	IDP.1644	AIS	11	rs9515201,rs9515201,rs9515201,rs9515201,rs9515201,rs9515201,rs9515201,rs9515201,rs9515201,rs9515201,rs9515201	0.018487	0.000763075	TRUE	3.0386e-56	53.6673	1.12298	0.890487
ISOVF in the left superior corona radiata	IDP.2077	AS	11	rs9739560,rs9739560,rs9739560,rs9739560,rs9739560,rs9739560,rs9739560,rs9739560,rs9739560,rs9739560,rs9739560	0.0141266	0.000484867	TRUE	2.60414e-47	40.8262	1.13058	0.8845
MD in the anterior limb of the left internal capsule	IDP.1619	AIS	14	rs9515201,rs9515201,rs9515201,rs9515201,rs9515201,rs9515201,rs9515201,rs9515201,rs9515201,rs9515201,rs9515201,rs9515201,rs9515201,rs9515201	0.0197267	0.000602043	TRUE	3.77808e-64	45.047	1.11883	0.89379
MD in the left posterior corona radiata	IDP.1629	CES	23	rs79569934,rs79569934,rs79569934,rs79569934,rs79569934,rs79569934,rs79569934,rs79569934,rs79569934,rs79569934,rs79569934,rs79569934,rs79569934,rs79569934,rs79569934,rs79569934,rs79569934,rs79569934,rs79569934,rs79569934,rs79569934,rs79569934,rs79569934	0.033381	0.00274708	TRUE	6.47162e-39	47.0398	1.20055	0.83295
ISOVF in the anterior limb of the left internal capsule	IDP.2069	SVS	10	rs72976977,rs72976977,rs72976977,rs72976977,rs72976977,rs72976977,rs72976977,rs72976977,rs72976977,rs72976977	0.0121854	0.00258894	TRUE	9.65678e-08	38.6625	1.41664	0.705898
ISOVF in the anterior limb of the right internal capsule	IDP.2068	AS	9	rs663853,rs663853,rs663853,rs663853,rs663853,rs663853,rs663853,rs663853,rs663853	0.0104522	0.000353341	TRUE	1.801e-35	36.7848	1.15337	0.867027
MD in the right superior corona radiata	IDP.1626	CES	29	rs8076187,rs8076187,rs8076187,rs8076187,rs8076187,rs8076187,rs8076187,rs8076187,rs8076187,rs8076187,rs8076187,rs8076187,rs8076187,rs8076187,rs8076187,rs8076187,rs8076187,rs8076187,rs8076187,rs8076187,rs8076187,rs8076187,rs8076187,rs8076187,rs8076187,rs8076187,rs8076187,rs8076187,rs8076187	0.0410034	0.00380961	TRUE	1.75893e-45	46.1831	1.1793	0.847964
ISOVF in the left superior corona radiata	IDP.2077	AIS	11	rs9739560,rs9739560,rs9739560,rs9739560,rs9739560,rs9739560,rs9739560,rs9739560,rs9739560,rs9739560,rs9739560	0.0141266	0.000590035	TRUE	4.04517e-43	40.8262	1.14189	0.87574
MD in the left superior fronto-occipital fasciculus	IDP.1645	SVS	9	rs6484437,rs6484437,rs6484437,rs6484437,rs6484437,rs6484437,rs6484437,rs6484437,rs6484437	0.0142986	0.00457301	TRUE	3.06484e-06	50.5191	1.37922	0.725045
MD in the right anterior thalamic radiation	IDP.1797	CES	13	rs76088357,rs76088357,rs76088357,rs76088357,rs76088357,rs76088357,rs76088357,rs76088357,rs76088357,rs76088357,rs76088357,rs76088357,rs76088357	0.0203344	0.00200744	TRUE	2.08697e-22	50.0385	1.26388	0.791217
FA in the anterior limb of the right internal capsule	IDP.1468	AS	14	rs807478,rs807478,rs807478,rs807478,rs807478,rs807478,rs807478,rs807478,rs807478,rs807478,rs807478,rs807478,rs807478,rs807478	0.0177286	0.000367053	TRUE	5.21287e-65	40.4011	1.11579	0.896229
MD in the left superior fronto-occipital fasciculus	IDP.1645	AIS	10	rs7733216,rs7733216,rs7733216,rs7733216,rs7733216,rs7733216,rs7733216,rs7733216,rs7733216,rs7733216	0.0156898	0.000486189	TRUE	4.52848e-51	49.9601	1.13417	0.8817
ISOVF in the anterior limb of the right internal capsule	IDP.2068	SVS	10	rs7314654,rs7314654,rs7314654,rs7314654,rs7314654,rs7314654,rs7314654,rs7314654,rs7314654,rs7314654	0.0119859	0.00292808	TRUE	6.94168e-07	38.022	1.42073	0.703863
FA in the anterior limb of the left internal capsule	IDP.1469	AS	11	rs80087860,rs80087860,rs80087860,rs80087860,rs80087860,rs80087860,rs80087860,rs80087860,rs80087860,rs80087860,rs80087860	0.0165932	0.000307873	TRUE	5.73561e-62	48.0764	1.11991	0.892933
MD in the right posterior corona radiata	IDP.1628	CES	14	rs8081606,rs8081606,rs8081606,rs8081606,rs8081606,rs8081606,rs8081606,rs8081606,rs8081606,rs8081606,rs8081606,rs8081606,rs8081606,rs8081606	0.022065	0.00229522	TRUE	1.12942e-23	50.5061	1.25209	0.798663
Volume of the white matter hyperintensities	IDP.0179	AS	10	rs7492460,rs7492460,rs7492460,rs7492460,rs7492460,rs7492460,rs7492460,rs7492460,rs7492460,rs7492460	0.0154632	0.000347889	TRUE	8.46687e-57	50.1875	1.12447	0.889309
FA in the anterior limb of the right internal capsule	IDP.1468	AIS	15	rs8179282,rs8179282,rs8179282,rs8179282,rs8179282,rs8179282,rs8179282,rs8179282,rs8179282,rs8179282,rs8179282,rs8179282,rs8179282,rs8179282,rs8179282	0.018718	0.00058537	TRUE	1.30959e-60	39.851	1.12218	0.891125
FA in the anterior limb of the left internal capsule	IDP.1469	AIS	12	rs8179284,rs8179284,rs8179284,rs8179284,rs8179284,rs8179284,rs8179284,rs8179284,rs8179284,rs8179284,rs8179284,rs8179284	0.0176669	0.000528628	TRUE	8.87054e-58	46.9717	1.12597	0.88812
ISOVF in the anterior limb of the left internal capsule	IDP.2069	AIS	9	rs72976977,rs72976977,rs72976977,rs72976977,rs72976977,rs72976977,rs72976977,rs72976977,rs72976977	0.0106012	0.000492477	TRUE	7.78586e-32	37.3145	1.16552	0.857985
ISOVF in the right posterior thalamic radiation	IDP.2080	CES	10	rs9739560,rs9739560,rs9739560,rs9739560,rs9739560,rs9739560,rs9739560,rs9739560,rs9739560,rs9739560	0.0138794	0.00123351	TRUE	2.265e-16	44.1123	1.32772	0.753172
MD in the right external capsule	IDP.1634	AIS	10	rs9943229,rs9943229,rs9943229,rs9943229,rs9943229,rs9943229,rs9943229,rs9943229,rs9943229,rs9943229	0.0177884	0.000471386	TRUE	1.47704e-59	56.7628	1.12552	0.888479
MD in the right posterior corona radiata	IDP.1628	AS	15	rs8081606,rs8081606,rs8081606,rs8081606,rs8081606,rs8081606,rs8081606,rs8081606,rs8081606,rs8081606,rs8081606,rs8081606,rs8081606,rs8081606,rs8081606	0.023719	0.000425977	TRUE	1.07518e-88	50.7571	1.09935	0.909629
MD in the right external capsule	IDP.1634	AS	9	rs9521686,rs9521686,rs9521686,rs9521686,rs9521686,rs9521686,rs9521686,rs9521686,rs9521686	0.0168131	0.000296908	TRUE	3.04602e-63	59.5546	1.11908	0.893595
ISOVF in the right posterior corona radiata	IDP.2078	AIS	7	rs9739560,rs9739560,rs9739560,rs9739560,rs9739560,rs9739560,rs9739560	0.0110538	0.000210466	TRUE	1.26446e-39	50.0496	1.16184	0.860707
ICVF in the left posterior corona radiata	IDP.1929	CES	26	rs8076187,rs8076187,rs8076187,rs8076187,rs8076187,rs8076187,rs8076187,rs8076187,rs8076187,rs8076187,rs8076187,rs8076187,rs8076187,rs8076187,rs8076187,rs8076187,rs8076187,rs8076187,rs8076187,rs8076187,rs8076187,rs8076187,rs8076187,rs8076187,rs8076187,rs8076187	0.0447314	0.0023502	TRUE	2.18489e-60	56.4164	1.17105	0.853937
MD in the left anterior thalamic radiation	IDP.1796	CES	13	rs76122535,rs76122535,rs76122535,rs76122535,rs76122535,rs76122535,rs76122535,rs76122535,rs76122535,rs76122535,rs76122535,rs76122535,rs76122535	0.0210371	0.00224509	TRUE	2.27433e-22	51.806	1.2589	0.794346
MD in the right posterior corona radiata	IDP.1628	AIS	15	rs8081606,rs8081606,rs8081606,rs8081606,rs8081606,rs8081606,rs8081606,rs8081606,rs8081606,rs8081606,rs8081606,rs8081606,rs8081606,rs8081606,rs8081606	0.023719	0.000397903	TRUE	2.27146e-85	50.7571	1.10783	0.902669
MD in the right anterior thalamic radiation	IDP.1797	AS	11	rs76088357,rs76088357,rs76088357,rs76088357,rs76088357,rs76088357,rs76088357,rs76088357,rs76088357,rs76088357,rs76088357	0.0181338	0.000307787	TRUE	1.57639e-68	52.622	1.11441	0.897335
MD in the right superior corona radiata	IDP.1626	AS	27	rs8076187,rs8076187,rs8076187,rs8076187,rs8076187,rs8076187,rs8076187,rs8076187,rs8076187,rs8076187,rs8076187,rs8076187,rs8076187,rs8076187,rs8076187,rs8076187,rs8076187,rs8076187,rs8076187,rs8076187,rs8076187,rs8076187,rs8076187,rs8076187,rs8076187,rs8076187,rs8076187	0.00293474	0.000165268	TRUE	1.68304e-09	47.1997	1.07657	0.928876
ICVF in the right posterior corona radiata	IDP.1928	CES	25	rs9899380,rs9899380,rs9899380,rs9899380,rs9899380,rs9899380,rs9899380,rs9899380,rs9899380,rs9899380,rs9899380,rs9899380,rs9899380,rs9899380,rs9899380,rs9899380,rs9899380,rs9899380,rs9899380,rs9899380,rs9899380,rs9899380,rs9899380,rs9899380,rs9899380	0.0390913	0.000475891	TRUE	1.50481e-154	50.3156	1.18526	0.843693
ISOVF in the right superior corona radiata	IDP.2076	CES	6	rs9739560,rs9739560,rs9739560,rs9739560,rs9739560,rs9739560	0.0386041	0.00276868	TRUE	3.01593e-47	49.4469	1.41182	0.708305
MD in the left superior corona radiata	IDP.1627	AS	23	rs9521686,rs9521686,rs9521686,rs9521686,rs9521686,rs9521686,rs9521686,rs9521686,rs9521686,rs9521686,rs9521686,rs9521686,rs9521686,rs9521686,rs9521686,rs9521686,rs9521686,rs9521686,rs9521686,rs9521686,rs9521686,rs9521686,rs9521686	0.00937586	0.00072695	TRUE	4.53972e-12	47.7838	1.08246	0.923818
FA in the right posterior thalamic radiation	IDP.1480	AS	14	rs9388446,rs9388446,rs9388446,rs9388446,rs9388446,rs9388446,rs9388446,rs9388446,rs9388446,rs9388446,rs9388446,rs9388446,rs9388446,rs9388446	0.0338912	0.000410114	TRUE	7.95894e-134	43.7444	1.11112	0.899995
FA in the left anterior thalamic radiation	IDP.1502	AS	10	rs9608859,rs9608859,rs9608859,rs9608859,rs9608859,rs9608859,rs9608859,rs9608859,rs9608859,rs9608859	0.0191669	0.000299501	TRUE	3.08147e-73	49.8989	1.12359	0.890005
MD in the left anterior thalamic radiation	IDP.1796	AS	13	rs76122535,rs76122535,rs76122535,rs76122535,rs76122535,rs76122535,rs76122535,rs76122535,rs76122535,rs76122535,rs76122535,rs76122535,rs76122535	0.0156712	0.000268285	TRUE	2.74455e-59	51.806	1.1058	0.904319
FA in the right anterior thalamic radiation	IDP.1503	AS	14	rs9608859,rs9608859,rs9608859,rs9608859,rs9608859,rs9608859,rs9608859,rs9608859,rs9608859,rs9608859,rs9608859,rs9608859,rs9608859,rs9608859	0.0210371	0.000356069	TRUE	2.08042e-79	45.0571	1.10943	0.901362
OD in the right posterior corona radiata	IDP.2003	AS	9	rs798518,rs798518,rs798518,rs798518,rs798518,rs798518,rs798518,rs798518,rs798518	0.0197318	0.000279972	TRUE	2.34552e-76	40.987	1.14483	0.873494
MD in the right anterior thalamic radiation	IDP.1797	AIS	11	rs76088357,rs76088357,rs76088357,rs76088357,rs76088357,rs76088357,rs76088357,rs76088357,rs76088357,rs76088357,rs76088357	0.0116324	0.000168537	TRUE	2.3066e-45	52.622	1.12424	0.889487
MD in the retrolenticular part of the right internal capsule	IDP.1622	AS	17	rs76238604,rs76238604,rs76238604,rs76238604,rs76238604,rs76238604,rs76238604,rs76238604,rs76238604,rs76238604,rs76238604,rs76238604,rs76238604,rs76238604,rs76238604,rs76238604,rs76238604	0.0181338	0.000379444	TRUE	2.9754e-63	47.8134	1.09608	0.912341
Volume of the white matter hyperintensities	IDP.0179	AIS	9	rs7492460,rs7492460,rs7492460,rs7492460,rs7492460,rs7492460,rs7492460,rs7492460,rs7492460	0.0252836	0.000294701	TRUE	3.91139e-100	49.9517	1.14327	0.874684
MD in the left inferior longitudinal fasciculus	IDP.1808	SVS	18	rs7732125,rs7732125,rs7732125,rs7732125,rs7732125,rs7732125,rs7732125,rs7732125,rs7732125,rs7732125,rs7732125,rs7732125,rs7732125,rs7732125,rs7732125,rs7732125,rs7732125,rs7732125	0.0138734	0.000283849	TRUE	1.90806e-49	56.4432	1.24228	0.804975
OD in the right posterior corona radiata	IDP.2003	AIS	9	rs798518,rs798518,rs798518,rs798518,rs798518,rs798518,rs798518,rs798518,rs798518	0.0314061	0.00178424	TRUE	3.93552e-34	40.987	1.15745	0.863966
ISOVF in the right superior corona radiata	IDP.2076	AS	7	rs9739560,rs9739560,rs9739560,rs9739560,rs9739560,rs9739560,rs9739560	0.0116324	0.000151416	TRUE	7.40061e-44	48.0369	1.15211	0.867973
MD in the retrolenticular part of the right internal capsule	IDP.1622	AIS	17	rs76238604,rs76238604,rs76238604,rs76238604,rs76238604,rs76238604,rs76238604,rs76238604,rs76238604,rs76238604,rs76238604,rs76238604,rs76238604,rs76238604,rs76238604,rs76238604,rs76238604	0.0106137	0.000268832	TRUE	4.27323e-38	47.8134	1.10427	0.905579
FA in the right inferior longitudinal fasciculus	IDP.1515	AS	19	rs9608859,rs9608859,rs9608859,rs9608859,rs9608859,rs9608859,rs9608859,rs9608859,rs9608859,rs9608859,rs9608859,rs9608859,rs9608859,rs9608859,rs9608859,rs9608859,rs9608859,rs9608859,rs9608859	0.0252836	0.000266622	TRUE	1.65965e-96	52.5128	1.08658	0.920316
MD in the left posterior thalamic radiation	IDP.1631	AS	21	rs9899380,rs9899380,rs9899380,rs9899380,rs9899380,rs9899380,rs9899380,rs9899380,rs9899380,rs9899380,rs9899380,rs9899380,rs9899380,rs9899380,rs9899380,rs9899380,rs9899380,rs9899380,rs9899380,rs9899380,rs9899380	0.0308601	0.00025857	TRUE	1.021e-126	50.324	1.08411	0.922417
ISOVF in the left superior corona radiata	IDP.2077	SVS	9	rs9739560,rs9739560,rs9739560,rs9739560,rs9739560,rs9739560,rs9739560,rs9739560,rs9739560	0.0326288	0.000297738	TRUE	6.69005e-133	37.6166	1.45051	0.689411
MD in the right superior corona radiata	IDP.1626	AIS	27	rs8076187,rs8076187,rs8076187,rs8076187,rs8076187,rs8076187,rs8076187,rs8076187,rs8076187,rs8076187,rs8076187,rs8076187,rs8076187,rs8076187,rs8076187,rs8076187,rs8076187,rs8076187,rs8076187,rs8076187,rs8076187,rs8076187,rs8076187,rs8076187,rs8076187,rs8076187,rs8076187	0.010686	0.0013524	TRUE	2.52912e-09	47.1208	1.0831	0.923275
ISOVF in the anterior limb of the right internal capsule	IDP.2068	AIS	11	rs7314654,rs7314654,rs7314654,rs7314654,rs7314654,rs7314654,rs7314654,rs7314654,rs7314654,rs7314654,rs7314654	0.0390283	0.000402382	TRUE	8.2931e-150	36.4259	1.15069	0.869041
ICVF in the right superior corona radiata	IDP.1926	AS	28	rs9608859,rs9608859,rs9608859,rs9608859,rs9608859,rs9608859,rs9608859,rs9608859,rs9608859,rs9608859,rs9608859,rs9608859,rs9608859,rs9608859,rs9608859,rs9608859,rs9608859,rs9608859,rs9608859,rs9608859,rs9608859,rs9608859,rs9608859,rs9608859,rs9608859,rs9608859,rs9608859,rs9608859	0.0126234	0.000378929	TRUE	1.3374e-41	57.2132	1.06837	0.936006
ISOVF in the left posterior thalamic radiation	IDP.2081	AS	9	rs7576060,rs7576060,rs7576060,rs7576060,rs7576060,rs7576060,rs7576060,rs7576060,rs7576060	0.0486539	0.000381672	TRUE	1.46825e-202	50.3387	1.12999	0.884965
MD in the splenium of corpus callosum	IDP.1606	SVS	16	rs79928268,rs79928268,rs79928268,rs79928268,rs79928268,rs79928268,rs79928268,rs79928268,rs79928268,rs79928268,rs79928268,rs79928268,rs79928268,rs79928268,rs79928268,rs79928268	0.0142484	0.000279539	TRUE	6.4728e-53	47.936	1.28241	0.779784
Cortical surface area of the left pars opercularis	IDP.0665	CES	5	rs2322791,rs2322791,rs2322791,rs2322791,rs2322791	0.0238906	0.00194606	TRUE	2.78151e-23	46.8192	1.47938	0.675959
MD in the left posterior corona radiata	IDP.1629	AS	20	rs76771822,rs76771822,rs76771822,rs76771822,rs76771822,rs76771822,rs76771822,rs76771822,rs76771822,rs76771822,rs76771822,rs76771822,rs76771822,rs76771822,rs76771822,rs76771822,rs76771822,rs76771822,rs76771822,rs76771822	0.00727134	0.000624638	TRUE	2.2014e-09	49.0201	1.08735	0.919664
FA in the left posterior corona radiata	IDP.1479	CES	8	rs884570,rs884570,rs884570,rs884570,rs884570,rs884570,rs884570,rs884570	0.0303412	0.000311841	TRUE	5.82526e-122	45.962	1.36361	0.733349
Volume of the white matter hyperintensities	IDP.0179	SVS	9	rs936393,rs936393,rs936393,rs936393,rs936393,rs936393,rs936393,rs936393,rs936393	0.0115948	0.00100945	TRUE	5.23622e-14	65.8497	1.32965	0.752075
MD in the right anterior corona radiata	IDP.1624	AIS	21	rs9608859,rs9608859,rs9608859,rs9608859,rs9608859,rs9608859,rs9608859,rs9608859,rs9608859,rs9608859,rs9608859,rs9608859,rs9608859,rs9608859,rs9608859,rs9608859,rs9608859,rs9608859,rs9608859,rs9608859,rs9608859	0.0182083	0.000899678	TRUE	3.83277e-21	56.2256	1.08628	0.920577
FA in the left posterior thalamic radiation	IDP.1481	AS	12	rs9388446,rs9388446,rs9388446,rs9388446,rs9388446,rs9388446,rs9388446,rs9388446,rs9388446,rs9388446,rs9388446,rs9388446	0.0363165	0.000345438	TRUE	1.82608e-140	45.6563	1.11772	0.894678
FA in the left posterior thalamic radiation	IDP.1481	AIS	11	rs9388446,rs9388446,rs9388446,rs9388446,rs9388446,rs9388446,rs9388446,rs9388446,rs9388446,rs9388446,rs9388446	0.0171802	0.000222713	TRUE	2.28021e-67	46.972	1.13183	0.883526
MD in the left external capsule	IDP.1635	AS	10	rs76122535,rs76122535,rs76122535,rs76122535,rs76122535,rs76122535,rs76122535,rs76122535,rs76122535,rs76122535	0.0162177	0.000231847	TRUE	6.3212e-60	55.2014	1.11727	0.895043
ISOVF in the right superior corona radiata	IDP.2076	AIS	6	rs9739560,rs9739560,rs9739560,rs9739560,rs9739560,rs9739560	0.0173072	0.000197685	TRUE	6.75743e-69	50.1919	1.17547	0.850725
ICVF in the left superior corona radiata	IDP.1927	CES	23	rs8081606,rs8081606,rs8081606,rs8081606,rs8081606,rs8081606,rs8081606,rs8081606,rs8081606,rs8081606,rs8081606,rs8081606,rs8081606,rs8081606,rs8081606,rs8081606,rs8081606,rs8081606,rs8081606,rs8081606,rs8081606,rs8081606,rs8081606	0.00951577	0.00028014	TRUE	7.94415e-32	59.5145	1.17729	0.849408
MD in the left superior longitudinal fasciculus	IDP.1643	SVS	33	rs9374289,rs9374289,rs9374289,rs9374289,rs9374289,rs9374289,rs9374289,rs9374289,rs9374289,rs9374289,rs9374289,rs9374289,rs9374289,rs9374289,rs9374289,rs9374289,rs9374289,rs9374289,rs9374289,rs9374289,rs9374289,rs9374289,rs9374289,rs9374289,rs9374289,rs9374289,rs9374289,rs9374289,rs9374289,rs9374289,rs9374289,rs9374289,rs9374289	0.0418623	0.00216331	TRUE	9.34429e-57	46.0494	1.19569	0.836336
FA in the right superior corona radiata	IDP.1476	AS	10	rs9530857,rs9530857,rs9530857,rs9530857,rs9530857,rs9530857,rs9530857,rs9530857,rs9530857,rs9530857	0.0462751	0.0037943	TRUE	2.6579e-44	43.4715	1.13283	0.882743
MD in the right superior longitudinal fasciculus	IDP.1642	SVS	29	rs9720591,rs9720591,rs9720591,rs9720591,rs9720591,rs9720591,rs9720591,rs9720591,rs9720591,rs9720591,rs9720591,rs9720591,rs9720591,rs9720591,rs9720591,rs9720591,rs9720591,rs9720591,rs9720591,rs9720591,rs9720591,rs9720591,rs9720591,rs9720591,rs9720591,rs9720591,rs9720591,rs9720591,rs9720591	0.0136801	0.000126134	TRUE	5.5422e-56	46.6386	1.20801	0.827809
ISOVF in the right posterior thalamic radiation	IDP.2080	AIS	8	rs9739560,rs9739560,rs9739560,rs9739560,rs9739560,rs9739560,rs9739560,rs9739560	0.0413914	0.00291643	TRUE	7.49394e-42	42.7834	1.16386	0.859212
MD in the right superior thalamic radiation	IDP.1818	AIS	12	rs8067689,rs8067689,rs8067689,rs8067689,rs8067689,rs8067689,rs8067689,rs8067689,rs8067689,rs8067689,rs8067689,rs8067689	0.010802	0.000189862	TRUE	3.22268e-39	45.6763	1.12782	0.886665
MD in the left posterior thalamic radiation	IDP.1631	AIS	21	rs9899380,rs9899380,rs9899380,rs9899380,rs9899380,rs9899380,rs9899380,rs9899380,rs9899380,rs9899380,rs9899380,rs9899380,rs9899380,rs9899380,rs9899380,rs9899380,rs9899380,rs9899380,rs9899380,rs9899380,rs9899380	0.0171885	0.000351691	TRUE	3.1668e-60	50.324	1.09123	0.916396
OD in the left posterior corona radiata	IDP.2004	AS	6	rs9652968,rs9652968,rs9652968,rs9652968,rs9652968,rs9652968	0.0326288	0.00033467	TRUE	4.85402e-125	40.2226	1.18162	0.846294
MD in the left posterior corona radiata	IDP.1629	AIS	21	rs79569934,rs79569934,rs79569934,rs79569934,rs79569934,rs79569934,rs79569934,rs79569934,rs79569934,rs79569934,rs79569934,rs79569934,rs79569934,rs79569934,rs79569934,rs79569934,rs79569934,rs79569934,rs79569934,rs79569934,rs79569934	0.00764036	0.000113881	TRUE	3.47746e-30	48.4097	1.09304	0.914882
MD in the left superior corona radiata	IDP.1627	AIS	22	rs9521686,rs9521686,rs9521686,rs9521686,rs9521686,rs9521686,rs9521686,rs9521686,rs9521686,rs9521686,rs9521686,rs9521686,rs9521686,rs9521686,rs9521686,rs9521686,rs9521686,rs9521686,rs9521686,rs9521686,rs9521686,rs9521686	0.0314273	0.000344046	TRUE	1.57699e-119	48.4001	1.09088	0.916689
MO in the right cingulum cingulate gyrus part	IDP.1561	SVS	7	rs818057,rs818057,rs818057,rs818057,rs818057,rs818057,rs818057	0.0328695	0.000317519	TRUE	8.68596e-127	41.8623	1.49106	0.670663
ISOVF in the left external capsule	IDP.2085	AIS	8	rs9308343,rs9308343,rs9308343,rs9308343,rs9308343,rs9308343,rs9308343,rs9308343	0.00926191	0.000698486	TRUE	4.37486e-10	53.4798	1.14557	0.872928
FA in the left inferior longitudinal fasciculus	IDP.1514	SVS	17	rs9898671,rs9898671,rs9898671,rs9898671,rs9898671,rs9898671,rs9898671,rs9898671,rs9898671,rs9898671,rs9898671,rs9898671,rs9898671,rs9898671,rs9898671,rs9898671,rs9898671	0.0134661	0.000145633	TRUE	1.13321e-51	59.4034	1.24307	0.80446
MD in the right anterior corona radiata	IDP.1624	AS	20	rs9608859,rs9608859,rs9608859,rs9608859,rs9608859,rs9608859,rs9608859,rs9608859,rs9608859,rs9608859,rs9608859,rs9608859,rs9608859,rs9608859,rs9608859,rs9608859,rs9608859,rs9608859,rs9608859,rs9608859	0.0312221	0.00162301	TRUE	8.28704e-35	56.4386	1.08137	0.924753
MD in the right posterior thalamic radiation	IDP.1630	AS	18	rs9899380,rs9899380,rs9899380,rs9899380,rs9899380,rs9899380,rs9899380,rs9899380,rs9899380,rs9899380,rs9899380,rs9899380,rs9899380,rs9899380,rs9899380,rs9899380,rs9899380,rs9899380	0.0347727	0.000236575	TRUE	9.80703e-146	52.5117	1.08899	0.918284
MD in the left cingulum cingulate gyrus part	IDP.1637	SVS	17	rs9293304,rs9293304,rs9293304,rs9293304,rs9293304,rs9293304,rs9293304,rs9293304,rs9293304,rs9293304,rs9293304,rs9293304,rs9293304,rs9293304,rs9293304,rs9293304,rs9293304	0.0292814	0.000287392	TRUE	2.88443e-118	64.2388	1.23307	0.810987
MD in the left anterior thalamic radiation	IDP.1796	AIS	12	rs76088357,rs76088357,rs76088357,rs76088357,rs76088357,rs76088357,rs76088357,rs76088357,rs76088357,rs76088357,rs76088357,rs76088357	0.0336763	0.00149984	TRUE	4.69696e-39	52.6989	1.11866	0.893923
MD in the right anterior corona radiata	IDP.1624	CES	20	rs9608859,rs9608859,rs9608859,rs9608859,rs9608859,rs9608859,rs9608859,rs9608859,rs9608859,rs9608859,rs9608859,rs9608859,rs9608859,rs9608859,rs9608859,rs9608859,rs9608859,rs9608859,rs9608859,rs9608859	0.0197783	0.000263359	TRUE	1.53786e-73	57.0975	1.19493	0.836871
FA in the left superior corona radiata	IDP.1477	AS	13	rs7502307,rs7502307,rs7502307,rs7502307,rs7502307,rs7502307,rs7502307,rs7502307,rs7502307,rs7502307,rs7502307,rs7502307,rs7502307	0.0351644	0.00173188	TRUE	2.51279e-48	38.0984	1.12407	0.889627
OD in the left posterior corona radiata	IDP.2004	AIS	5	rs9652968,rs9652968,rs9652968,rs9652968,rs9652968	0.0155577	0.000118304	TRUE	1.05124e-64	40.2245	1.21837	0.820767
MD in the left external capsule	IDP.1635	AIS	11	rs8179283,rs8179283,rs8179283,rs8179283,rs8179283,rs8179283,rs8179283,rs8179283,rs8179283,rs8179283,rs8179283	0.00637508	8.64376e-05	TRUE	1.39135e-24	54.2407	1.1223	0.891024
MD in the left anterior corona radiata	IDP.1625	AIS	22	rs75214355,rs75214355,rs75214355,rs75214355,rs75214355,rs75214355,rs75214355,rs75214355,rs75214355,rs75214355,rs75214355,rs75214355,rs75214355,rs75214355,rs75214355,rs75214355,rs75214355,rs75214355,rs75214355,rs75214355,rs75214355,rs75214355	0.0186809	0.000217078	TRUE	1.14998e-70	55.4767	1.08485	0.921784
MD in the right inferior fronto-occipital fasciculus	IDP.1807	SVS	18	rs9915591,rs9915591,rs9915591,rs9915591,rs9915591,rs9915591,rs9915591,rs9915591,rs9915591,rs9915591,rs9915591,rs9915591,rs9915591,rs9915591,rs9915591,rs9915591,rs9915591,rs9915591	0.0374941	0.000357813	TRUE	4.94162e-145	58.2968	1.2381	0.807689
ISOVF in the left posterior corona radiata	IDP.2079	AS	11	rs9739560,rs9739560,rs9739560,rs9739560,rs9739560,rs9739560,rs9739560,rs9739560,rs9739560,rs9739560,rs9739560	0.032405	0.00177956	TRUE	1.53033e-35	45.0373	1.12405	0.889639
MO in the left cerebral peduncle	IDP.1542	SVS	9	rs7111970,rs7111970,rs7111970,rs7111970,rs7111970,rs7111970,rs7111970,rs7111970,rs7111970	0.0155609	0.000283571	TRUE	2.44572e-58	39.9284	1.43493	0.6969
ISOVF in the right sagittal stratum	IDP.2082	AS	12	rs9308343,rs9308343,rs9308343,rs9308343,rs9308343,rs9308343,rs9308343,rs9308343,rs9308343,rs9308343,rs9308343,rs9308343	0.0113347	0.00104969	TRUE	3.406e-11	58.1681	1.10388	0.905898
MD in the left inferior fronto-occipital fasciculus	IDP.1806	SVS	21	rs9748135,rs9748135,rs9748135,rs9748135,rs9748135,rs9748135,rs9748135,rs9748135,rs9748135,rs9748135,rs9748135,rs9748135,rs9748135,rs9748135,rs9748135,rs9748135,rs9748135,rs9748135,rs9748135,rs9748135,rs9748135	0.0217875	0.000144766	TRUE	2.29666e-91	56.7061	1.22252	0.81798
MO in the right fornix and stria terminalis	IDP.1565	SVS	6	rs9480406,rs9480406,rs9480406,rs9480406,rs9480406,rs9480406	0.0366161	0.00221671	TRUE	6.2346e-39	34.4399	1.60815	0.621832
MD in the retrolenticular part of the left internal capsule	IDP.1623	AS	17	rs9608859,rs9608859,rs9608859,rs9608859,rs9608859,rs9608859,rs9608859,rs9608859,rs9608859,rs9608859,rs9608859,rs9608859,rs9608859,rs9608859,rs9608859,rs9608859,rs9608859	0.0065488	0.00100613	TRUE	1.1091e-05	48.6415	1.09524	0.913039
MD in the right anterior corona radiata	IDP.1624	SVS	20	rs9608859,rs9608859,rs9608859,rs9608859,rs9608859,rs9608859,rs9608859,rs9608859,rs9608859,rs9608859,rs9608859,rs9608859,rs9608859,rs9608859,rs9608859,rs9608859,rs9608859,rs9608859,rs9608859,rs9608859	0.02571	0.00017609	TRUE	1.71836e-107	55.61	1.23079	0.812489
ISOVF in the left posterior corona radiata	IDP.2079	AIS	11	rs9739560,rs9739560,rs9739560,rs9739560,rs9739560,rs9739560,rs9739560,rs9739560,rs9739560,rs9739560,rs9739560	0.0342797	0.00185203	TRUE	9.81814e-38	43.4534	1.13732	0.879263
FA in the right superior fronto-occipital fasciculus	IDP.1494	AS	8	rs9398787,rs9398787,rs9398787,rs9398787,rs9398787,rs9398787,rs9398787,rs9398787	0.015022	0.000237692	TRUE	7.74163e-55	41.1413	1.15385	0.866664
Cortical surface area of the left pars orbitalis	IDP.0666	CES	7	rs543640,rs543640,rs543640,rs543640,rs543640,rs543640,rs543640	0.0103911	0.000145159	TRUE	7.25814e-41	35.7754	1.46041	0.68474
ISOVF in the left cerebral peduncle	IDP.2067	AS	2	rs7196814,rs7196814	0.00777553	0.00039228	TRUE	1.15984e-11	41.1337	1.32995	0.75191
FA in the forceps minor	IDP.1511	SVS	22	rs7761265,rs7761265,rs7761265,rs7761265,rs7761265,rs7761265,rs7761265,rs7761265,rs7761265,rs7761265,rs7761265,rs7761265,rs7761265,rs7761265,rs7761265,rs7761265,rs7761265,rs7761265,rs7761265,rs7761265,rs7761265,rs7761265	0.00261727	5.12113e-05	TRUE	6.4111e-11	56.4917	1.21753	0.821335
ISOVF in the right posterior thalamic radiation	IDP.2080	AS	9	rs9739560,rs9739560,rs9739560,rs9739560,rs9739560,rs9739560,rs9739560,rs9739560,rs9739560	0.0381552	0.00183206	TRUE	2.50736e-43	41.7469	1.14343	0.874563
Volume of the right caudate	IDP.0014	AS	26	rs947934,rs947934,rs947934,rs947934,rs947934,rs947934,rs947934,rs947934,rs947934,rs947934,rs947934,rs947934,rs947934,rs947934,rs947934,rs947934,rs947934,rs947934,rs947934,rs947934,rs947934,rs947934,rs947934,rs947934,rs947934,rs947934	0.0118457	0.000287405	TRUE	1.10633e-42	41.6655	1.0855	0.921234
MD in the left external capsule	IDP.1635	SVS	9	rs8179283,rs8179283,rs8179283,rs8179283,rs8179283,rs8179283,rs8179283,rs8179283,rs8179283	0.0316155	0.000367754	TRUE	2.22435e-130	41.658	1.42422	0.702138
FA in the left posterior corona radiata	IDP.1479	SVS	7	rs884570,rs884570,rs884570,rs884570,rs884570,rs884570,rs884570	0.0118201	0.00213489	TRUE	2.14179e-08	47.7797	1.4538	0.687854
MD in the right superior longitudinal fasciculus	IDP.1642	AIS	28	rs9720591,rs9720591,rs9720591,rs9720591,rs9720591,rs9720591,rs9720591,rs9720591,rs9720591,rs9720591,rs9720591,rs9720591,rs9720591,rs9720591,rs9720591,rs9720591,rs9720591,rs9720591,rs9720591,rs9720591,rs9720591,rs9720591,rs9720591,rs9720591,rs9720591,rs9720591,rs9720591,rs9720591	0.0105575	0.000929261	TRUE	1.01877e-10	48.6515	1.08031	0.925657
ISOVF in the right anterior thalamic radiation	IDP.2103	AIS	11	rs8177186,rs8177186,rs8177186,rs8177186,rs8177186,rs8177186,rs8177186,rs8177186,rs8177186,rs8177186,rs8177186	0.0416753	0.000435956	TRUE	6.78804e-160	39.3617	1.14465	0.873632
Volume of the right caudate	IDP.0014	AIS	25	rs947934,rs947934,rs947934,rs947934,rs947934,rs947934,rs947934,rs947934,rs947934,rs947934,rs947934,rs947934,rs947934,rs947934,rs947934,rs947934,rs947934,rs947934,rs947934,rs947934,rs947934,rs947934,rs947934,rs947934,rs947934	0.0136272	0.000212221	TRUE	5.72324e-50	41.332	1.095	0.913246
MD in the right posterior thalamic radiation	IDP.1630	AIS	18	rs9899380,rs9899380,rs9899380,rs9899380,rs9899380,rs9899380,rs9899380,rs9899380,rs9899380,rs9899380,rs9899380,rs9899380,rs9899380,rs9899380,rs9899380,rs9899380,rs9899380,rs9899380	0.0301993	0.000302085	TRUE	2.11111e-120	52.5117	1.09654	0.911958
ISOVF in the right anterior thalamic radiation	IDP.2103	AS	11	rs8177186,rs8177186,rs8177186,rs8177186,rs8177186,rs8177186,rs8177186,rs8177186,rs8177186,rs8177186,rs8177186	0.0292814	0.000319043	TRUE	2.21112e-111	39.3617	1.13311	0.882531
ISOVF in the left superior thalamic radiation	IDP.2123	AIS	12	rs9739560,rs9739560,rs9739560,rs9739560,rs9739560,rs9739560,rs9739560,rs9739560,rs9739560,rs9739560,rs9739560,rs9739560	0.0136272	0.000202203	TRUE	9.51502e-53	46.6439	1.12643	0.88776
FA in the left posterior corona radiata	IDP.1479	AS	6	rs884570,rs884570,rs884570,rs884570,rs884570,rs884570	0.0175468	0.000197519	TRUE	1.12651e-66	49.09	1.16322	0.85968
ISOVF in the right sagittal stratum	IDP.2082	AIS	13	rs9308343,rs9308343,rs9308343,rs9308343,rs9308343,rs9308343,rs9308343,rs9308343,rs9308343,rs9308343,rs9308343,rs9308343,rs9308343	0.00930885	5.77266e-05	TRUE	5.92573e-40	58.0069	1.10836	0.902233
Thickness of the left fusiform gyrus	IDP.1026	AIS	4	rs7575796,rs7575796,rs7575796,rs7575796	0.0234973	0.000208898	TRUE	2.43252e-91	38.4481	1.25595	0.79621
OD in the right external capsule	IDP.2009	AS	17	rs9467713,rs9467713,rs9467713,rs9467713,rs9467713,rs9467713,rs9467713,rs9467713,rs9467713,rs9467713,rs9467713,rs9467713,rs9467713,rs9467713,rs9467713,rs9467713,rs9467713	0.00478881	8.3782e-05	TRUE	1.90791e-18	41.9794	1.10269	0.90687
MD in the left sagittal stratum	IDP.1633	AS	21	rs9899380,rs9899380,rs9899380,rs9899380,rs9899380,rs9899380,rs9899380,rs9899380,rs9899380,rs9899380,rs9899380,rs9899380,rs9899380,rs9899380,rs9899380,rs9899380,rs9899380,rs9899380,rs9899380,rs9899380,rs9899380	0.0222679	8.84456e-05	TRUE	4.65036e-97	58.0495	1.07829	0.927391
MD in the retrolenticular part of the left internal capsule	IDP.1623	AIS	17	rs9608859,rs9608859,rs9608859,rs9608859,rs9608859,rs9608859,rs9608859,rs9608859,rs9608859,rs9608859,rs9608859,rs9608859,rs9608859,rs9608859,rs9608859,rs9608859,rs9608859	0.0374505	0.000231113	TRUE	2.00458e-158	48.6415	1.10335	0.906327
OD in the right anterior thalamic radiation	IDP.2028	AS	7	rs958073,rs958073,rs958073,rs958073,rs958073,rs958073,rs958073	0.02571	0.000193391	TRUE	1.49293e-101	36.1081	1.17715	0.849507
Cortical surface area of the right banks superior temporal sulcus	IDP.0683	CES	3	rs1419832,rs1419832,rs1419832	0.00799933	0.000122602	TRUE	2.04348e-31	33.832	1.8104	0.552363
ICVF in the left superior fronto-occipital fasciculus	IDP.1945	AS	15	rs798562,rs798562,rs798562,rs798562,rs798562,rs798562,rs798562,rs798562,rs798562,rs798562,rs798562,rs798562,rs798562,rs798562,rs798562	0.00316548	0.000258486	TRUE	6.87942e-05	48.4997	1.10169	0.907696
MD in the left anterior corona radiata	IDP.1625	AS	21	rs75214355,rs75214355,rs75214355,rs75214355,rs75214355,rs75214355,rs75214355,rs75214355,rs75214355,rs75214355,rs75214355,rs75214355,rs75214355,rs75214355,rs75214355,rs75214355,rs75214355,rs75214355,rs75214355,rs75214355,rs75214355	0.022688	0.000219194	TRUE	8.8911e-92	55.7643	1.07988	0.926027
ISOVF in the left posterior corona radiata	IDP.2079	SVS	12	rs9739560,rs9739560,rs9739560,rs9739560,rs9739560,rs9739560,rs9739560,rs9739560,rs9739560,rs9739560,rs9739560,rs9739560	0.036029	0.000282864	TRUE	4.13501e-149	44.2016	1.34718	0.74229
ISOVF in the left acoustic radiation	IDP.2100	AIS	6	rs798500,rs798500,rs798500,rs798500,rs798500,rs798500	0.0166428	0.0010407	TRUE	4.13306e-18	47.6631	1.1804	0.847167
ISOVF in the left cerebral peduncle	IDP.2067	AIS	2	rs7196814,rs7196814	0.00904107	5.45154e-05	TRUE	3.83354e-37	41.1337	1.36106	0.734723
FA in the anterior limb of the left internal capsule	IDP.1469	SVS	7	rs4283494,rs4283494,rs4283494,rs4283494,rs4283494,rs4283494,rs4283494	0.00261727	4.08263e-05	TRUE	8.83558e-11	42.7994	1.48458	0.673591
ICVF in the left superior corona radiata	IDP.1927	AS	24	rs9487744,rs9487744,rs9487744,rs9487744,rs9487744,rs9487744,rs9487744,rs9487744,rs9487744,rs9487744,rs9487744,rs9487744,rs9487744,rs9487744,rs9487744,rs9487744,rs9487744,rs9487744,rs9487744,rs9487744,rs9487744,rs9487744,rs9487744,rs9487744	0.00946725	0.0013314	TRUE	5.35674e-08	58.1879	1.07317	0.931821
MD in the right superior thalamic radiation	IDP.1818	AS	12	rs8067689,rs8067689,rs8067689,rs8067689,rs8067689,rs8067689,rs8067689,rs8067689,rs8067689,rs8067689,rs8067689,rs8067689	0.042674	0.000269695	TRUE	1.43535e-180	45.2882	1.11821	0.894283
FA in the right inferior cerebellar peduncle	IDP.1462	AIS	9	rs9398171,rs9398171,rs9398171,rs9398171,rs9398171,rs9398171,rs9398171,rs9398171,rs9398171	0.017045	0.000148524	TRUE	7.20876e-70	42.0682	1.15529	0.86558
ISOVF in the right cingulum cingulate gyrus part	IDP.2086	AIS	11	rs9898671,rs9898671,rs9898671,rs9898671,rs9898671,rs9898671,rs9898671,rs9898671,rs9898671,rs9898671,rs9898671	0.011935	8.87406e-05	TRUE	1.03649e-47	47.0748	1.13168	0.883645
MD in the forceps minor	IDP.1805	SVS	23	rs9635723,rs9635723,rs9635723,rs9635723,rs9635723,rs9635723,rs9635723,rs9635723,rs9635723,rs9635723,rs9635723,rs9635723,rs9635723,rs9635723,rs9635723,rs9635723,rs9635723,rs9635723,rs9635723,rs9635723,rs9635723,rs9635723,rs9635723	0.0162538	0.000177491	TRUE	4.71004e-62	57.3243	1.21084	0.825874
ICVF in the right posterior corona radiata	IDP.1928	AS	24	rs9899380,rs9899380,rs9899380,rs9899380,rs9899380,rs9899380,rs9899380,rs9899380,rs9899380,rs9899380,rs9899380,rs9899380,rs9899380,rs9899380,rs9899380,rs9899380,rs9899380,rs9899380,rs9899380,rs9899380,rs9899380,rs9899380,rs9899380,rs9899380	0.0403843	0.00196142	TRUE	1.05878e-45	52.5281	1.07699	0.928516
MO in the right cingulum cingulate gyrus part	IDP.1561	AIS	8	rs818057,rs818057,rs818057,rs818057,rs818057,rs818057,rs818057,rs818057	0.0386849	0.000275117	TRUE	9.86946e-162	40.8389	1.16798	0.85618
ISOVF in the forceps major	IDP.2110	AIS	7	rs76850797,rs76850797,rs76850797,rs76850797,rs76850797,rs76850797,rs76850797	0.0103156	0.000138687	TRUE	6.74549e-39	44.7483	1.1718	0.853387
MD in the posterior limb of the right internal capsule	IDP.1620	AS	10	rs67827860,rs67827860,rs67827860,rs67827860,rs67827860,rs67827860,rs67827860,rs67827860,rs67827860,rs67827860	0.00989481	0.000121468	TRUE	8.77171e-38	54.1419	1.11845	0.894094
FA in the right inferior cerebellar peduncle	IDP.1462	AS	9	rs9398171,rs9398171,rs9398171,rs9398171,rs9398171,rs9398171,rs9398171,rs9398171,rs9398171	0.0169804	0.000142225	TRUE	7.00461e-70	42.0682	1.14285	0.875004
MO in the left cingulum cingulate gyrus part	IDP.1562	SVS	8	rs7942990,rs7942990,rs7942990,rs7942990,rs7942990,rs7942990,rs7942990,rs7942990	0.011935	7.56967e-05	TRUE	9.95771e-51	38.3477	1.47774	0.676708
MO in the right inferior cerebellar peduncle	IDP.1537	AS	2	rs16939343,rs16939343	0.00969241	0.000608837	TRUE	4.25275e-11	33.7024	1.37018	0.729832
ISOVF in the right anterior thalamic radiation	IDP.2103	CES	11	rs8177186,rs8177186,rs8177186,rs8177186,rs8177186,rs8177186,rs8177186,rs8177186,rs8177186,rs8177186,rs8177186	0.00214543	2.98666e-05	TRUE	1.31913e-09	37.1444	1.34228	0.745
MD in the right superior longitudinal fasciculus	IDP.1642	AS	27	rs9720591,rs9720591,rs9720591,rs9720591,rs9720591,rs9720591,rs9720591,rs9720591,rs9720591,rs9720591,rs9720591,rs9720591,rs9720591,rs9720591,rs9720591,rs9720591,rs9720591,rs9720591,rs9720591,rs9720591,rs9720591,rs9720591,rs9720591,rs9720591,rs9720591,rs9720591,rs9720591	0.0128694	0.000504921	TRUE	1.89434e-19	48.4703	1.07556	0.929745
MD in the right inferior longitudinal fasciculus	IDP.1809	AS	24	rs9471172,rs9471172,rs9471172,rs9471172,rs9471172,rs9471172,rs9471172,rs9471172,rs9471172,rs9471172,rs9471172,rs9471172,rs9471172,rs9471172,rs9471172,rs9471172,rs9471172,rs9471172,rs9471172,rs9471172,rs9471172,rs9471172,rs9471172,rs9471172	0.0401019	0.000314051	TRUE	2.79591e-166	51.0199	1.07811	0.927545
ISOVF in the splenium of corpus callosum	IDP.2056	CES	2	rs185307128,rs185307128	0.0376171	0.000258984	TRUE	1.18297e-157	37.1152	1.98794	0.503034
MD in the left superior thalamic radiation	IDP.1817	AS	9	rs75042717,rs75042717,rs75042717,rs75042717,rs75042717,rs75042717,rs75042717,rs75042717,rs75042717	0.00236211	0.000150574	TRUE	0.000335212	48.6639	1.13231	0.883148
ISOVF in the right external capsule	IDP.2084	SVS	9	rs9308343,rs9308343,rs9308343,rs9308343,rs9308343,rs9308343,rs9308343,rs9308343,rs9308343	0.0137811	0.000198623	TRUE	1.54955e-53	53.873	1.36546	0.732351
ICVF in the right tapetum	IDP.1948	AS	18	rs76566528,rs76566528,rs76566528,rs76566528,rs76566528,rs76566528,rs76566528,rs76566528,rs76566528,rs76566528,rs76566528,rs76566528,rs76566528,rs76566528,rs76566528,rs76566528,rs76566528,rs76566528	0.0152337	0.000954705	TRUE	1.11889e-16	46.2394	1.09493	0.913305
MD in the right sagittal stratum	IDP.1632	AS	19	rs9899380,rs9899380,rs9899380,rs9899380,rs9899380,rs9899380,rs9899380,rs9899380,rs9899380,rs9899380,rs9899380,rs9899380,rs9899380,rs9899380,rs9899380,rs9899380,rs9899380,rs9899380,rs9899380	0.0258749	0.000283435	TRUE	3.27102e-103	56.6494	1.08334	0.923072
ICVF in the left tapetum	IDP.1949	AS	9	rs9487729,rs9487729,rs9487729,rs9487729,rs9487729,rs9487729,rs9487729,rs9487729,rs9487729	0.0332088	0.000232418	TRUE	9.17856e-139	55.6905	1.1233	0.890231
ISOVF in the left superior thalamic radiation	IDP.2123	AS	10	rs4862340,rs4862340,rs4862340,rs4862340,rs4862340,rs4862340,rs4862340,rs4862340,rs4862340,rs4862340	0.0157397	0.000102119	TRUE	2.25675e-66	47.3951	1.12695	0.887349
FA in the posterior limb of the right internal capsule	IDP.1470	AS	21	rs9984070,rs9984070,rs9984070,rs9984070,rs9984070,rs9984070,rs9984070,rs9984070,rs9984070,rs9984070,rs9984070,rs9984070,rs9984070,rs9984070,rs9984070,rs9984070,rs9984070,rs9984070,rs9984070,rs9984070,rs9984070	0.0148969	6.19785e-05	TRUE	5.13479e-65	45.0584	1.08893	0.918329
Volume of the right pars orbitalis	IDP.0394	AS	3	rs72691108,rs72691108,rs72691108	0.0293148	0.000166875	TRUE	1.60926e-124	41.462	1.264	0.791137
FA in the left superior thalamic radiation	IDP.1523	AIS	16	rs798551,rs798551,rs798551,rs798551,rs798551,rs798551,rs798551,rs798551,rs798551,rs798551,rs798551,rs798551,rs798551,rs798551,rs798551,rs798551	0.0038769	0.000121158	TRUE	1.76315e-14	49.4926	1.10567	0.904429
Volume of the left supramarginal gyrus	IDP.0373	SVS	5	rs67316928,rs67316928,rs67316928,rs67316928,rs67316928	0.0246475	0.000209867	TRUE	3.26458e-96	62.8676	1.47634	0.677349
ISOVF in the anterior limb of the right internal capsule	IDP.2068	CES	11	rs663853,rs663853,rs663853,rs663853,rs663853,rs663853,rs663853,rs663853,rs663853,rs663853,rs663853	0.00973967	0.000272606	TRUE	1.82031e-13	36.5108	1.34566	0.743128
ISOVF in the forceps minor	IDP.2111	AIS	8	rs3852188,rs3852188,rs3852188,rs3852188,rs3852188,rs3852188,rs3852188,rs3852188	0.0126523	0.00105482	TRUE	2.09433e-15	49.6628	1.15138	0.868526
FA in the right inferior longitudinal fasciculus	IDP.1515	SVS	17	rs9608859,rs9608859,rs9608859,rs9608859,rs9608859,rs9608859,rs9608859,rs9608859,rs9608859,rs9608859,rs9608859,rs9608859,rs9608859,rs9608859,rs9608859,rs9608859,rs9608859	0.0125173	0.000127103	TRUE	1.86346e-48	53.9836	1.25598	0.796188
Thickness of the left lateral occipital cortex	IDP.1030	AIS	6	rs7219015,rs7219015,rs7219015,rs7219015,rs7219015,rs7219015	0.0284537	0.00181284	TRUE	6.06998e-30	39.8618	1.20079	0.832784
ISOVF in the left external capsule	IDP.2085	AS	7	rs9308343,rs9308343,rs9308343,rs9308343,rs9308343,rs9308343,rs9308343	0.00742807	0.000100881	TRUE	9.8101e-29	56.5036	1.1396	0.8775
MD in the left sagittal stratum	IDP.1633	AIS	22	rs9899380,rs9899380,rs9899380,rs9899380,rs9899380,rs9899380,rs9899380,rs9899380,rs9899380,rs9899380,rs9899380,rs9899380,rs9899380,rs9899380,rs9899380,rs9899380,rs9899380,rs9899380,rs9899380,rs9899380,rs9899380,rs9899380	0.0124613	6.24338e-05	TRUE	6.87954e-54	57.4253	1.0834	0.92302
MD in the left sagittal stratum	IDP.1633	SVS	20	rs9899380,rs9899380,rs9899380,rs9899380,rs9899380,rs9899380,rs9899380,rs9899380,rs9899380,rs9899380,rs9899380,rs9899380,rs9899380,rs9899380,rs9899380,rs9899380,rs9899380,rs9899380,rs9899380,rs9899380	0.0387604	0.000343304	TRUE	3.65133e-151	59.5062	1.2226	0.817928
FA in the forceps minor	IDP.1511	AS	21	rs7761265,rs7761265,rs7761265,rs7761265,rs7761265,rs7761265,rs7761265,rs7761265,rs7761265,rs7761265,rs7761265,rs7761265,rs7761265,rs7761265,rs7761265,rs7761265,rs7761265,rs7761265,rs7761265,rs7761265,rs7761265	0.0365937	0.00148362	TRUE	2.22469e-43	56.696	1.07922	0.926594
ISOVF in the left posterior thalamic radiation	IDP.2081	AIS	8	rs4233964,rs4233964,rs4233964,rs4233964,rs4233964,rs4233964,rs4233964,rs4233964	0.0366101	0.000190695	TRUE	6.51902e-157	47.826	1.15443	0.866227
MD in the right inferior longitudinal fasciculus	IDP.1809	AIS	23	rs7789060,rs7789060,rs7789060,rs7789060,rs7789060,rs7789060,rs7789060,rs7789060,rs7789060,rs7789060,rs7789060,rs7789060,rs7789060,rs7789060,rs7789060,rs7789060,rs7789060,rs7789060,rs7789060,rs7789060,rs7789060,rs7789060,rs7789060	0.0120594	0.000150868	TRUE	1.22864e-45	51.8362	1.08585	0.920935
Volume of the right pars orbitalis	IDP.0394	AIS	2	rs72691108,rs72691108	0.0366617	0.000302084	TRUE	6.90314e-144	47.036	1.33792	0.74743
OD in the retrolenticular part of the left internal capsule	IDP.1998	AIS	6	rs9508952,rs9508952,rs9508952,rs9508952,rs9508952,rs9508952	0.00708287	0.000113828	TRUE	1.49052e-26	37.2666	1.2061	0.829121
MO in the right cingulum cingulate gyrus part	IDP.1561	AS	7	rs818057,rs818057,rs818057,rs818057,rs818057,rs818057,rs818057	0.00926191	3.96195e-05	TRUE	7.26048e-41	41.8623	1.16367	0.859352
FA in the right cingulum hippocampus	IDP.1488	AIS	8	rs78561280,rs78561280,rs78561280,rs78561280,rs78561280,rs78561280,rs78561280,rs78561280	0.00960786	5.11189e-05	TRUE	9.1601e-40	38.01	1.17456	0.851385
MD in the left superior thalamic radiation	IDP.1817	AIS	9	rs75042717,rs75042717,rs75042717,rs75042717,rs75042717,rs75042717,rs75042717,rs75042717,rs75042717	0.0137811	0.000221417	TRUE	2.65346e-50	48.6639	1.14378	0.874293
FA in the body of corpus callosum	IDP.1455	SVS	12	rs7590302,rs7590302,rs7590302,rs7590302,rs7590302,rs7590302,rs7590302,rs7590302,rs7590302,rs7590302,rs7590302,rs7590302	0.0160691	0.00166762	TRUE	1.28144e-14	42.6538	1.35431	0.738385
ISOVF in the right sagittal stratum	IDP.2082	CES	12	rs9308343,rs9308343,rs9308343,rs9308343,rs9308343,rs9308343,rs9308343,rs9308343,rs9308343,rs9308343,rs9308343,rs9308343	0.0210188	0.000899021	TRUE	2.61703e-30	56.0715	1.25903	0.79426
MD in the splenium of corpus callosum	IDP.1606	CES	16	rs79928268,rs79928268,rs79928268,rs79928268,rs79928268,rs79928268,rs79928268,rs79928268,rs79928268,rs79928268,rs79928268,rs79928268,rs79928268,rs79928268,rs79928268,rs79928268	0.020125	0.00108256	TRUE	2.25042e-27	40.2255	1.26542	0.790254
Thickness of the left posterior-cingulate cortex	IDP.1042	CES	2	rs7862747,rs7862747	0.00197667	0.000145226	TRUE	0.00133498	31.6515	2.11938	0.471837
MD in the retrolenticular part of the left internal capsule	IDP.1623	SVS	18	rs9608859,rs9608859,rs9608859,rs9608859,rs9608859,rs9608859,rs9608859,rs9608859,rs9608859,rs9608859,rs9608859,rs9608859,rs9608859,rs9608859,rs9608859,rs9608859,rs9608859,rs9608859	0.0267854	0.00162983	TRUE	1.18924e-28	47.912	1.2648	0.79064
MD in the posterior limb of the right internal capsule	IDP.1620	SVS	9	rs67827860,rs67827860,rs67827860,rs67827860,rs67827860,rs67827860,rs67827860,rs67827860,rs67827860	0.0144018	0.000508647	TRUE	2.63659e-18	50.8907	1.37763	0.725886
ICVF in the left tapetum	IDP.1949	SVS	9	rs9487729,rs9487729,rs9487729,rs9487729,rs9487729,rs9487729,rs9487729,rs9487729,rs9487729	0.0157397	0.00049388	TRUE	2.28727e-20	55.6905	1.35859	0.736056
MD in the left inferior fronto-occipital fasciculus	IDP.1806	AS	21	rs9748135,rs9748135,rs9748135,rs9748135,rs9748135,rs9748135,rs9748135,rs9748135,rs9748135,rs9748135,rs9748135,rs9748135,rs9748135,rs9748135,rs9748135,rs9748135,rs9748135,rs9748135,rs9748135,rs9748135,rs9748135	0.036534	0.000213453	TRUE	3.49847e-155	56.574	1.07931	0.926521
ICVF in the left posterior thalamic radiation	IDP.1931	SVS	24	rs9899380,rs9899380,rs9899380,rs9899380,rs9899380,rs9899380,rs9899380,rs9899380,rs9899380,rs9899380,rs9899380,rs9899380,rs9899380,rs9899380,rs9899380,rs9899380,rs9899380,rs9899380,rs9899380,rs9899380,rs9899380,rs9899380,rs9899380,rs9899380	0.0499036	0.00254641	TRUE	9.40876e-56	68.5633	1.1878	0.841894
ISOVF in the right anterior corona radiata	IDP.2074	AS	12	rs76036374,rs76036374,rs76036374,rs76036374,rs76036374,rs76036374,rs76036374,rs76036374,rs76036374,rs76036374,rs76036374,rs76036374	0.0192377	0.00018066	TRUE	3.82725e-78	51.2277	1.1109	0.900168
MD in the right inferior longitudinal fasciculus	IDP.1809	SVS	21	rs7789060,rs7789060,rs7789060,rs7789060,rs7789060,rs7789060,rs7789060,rs7789060,rs7789060,rs7789060,rs7789060,rs7789060,rs7789060,rs7789060,rs7789060,rs7789060,rs7789060,rs7789060,rs7789060,rs7789060,rs7789060	0.0339443	0.00169625	TRUE	3.4282e-38	52.4202	1.23205	0.811655
OD in the right cerebral peduncle	IDP.1991	SVS	11	rs7040561,rs7040561,rs7040561,rs7040561,rs7040561,rs7040561,rs7040561,rs7040561,rs7040561,rs7040561,rs7040561	0.0171604	0.00108077	TRUE	1.3624e-18	49.7455	1.3411	0.745656
FA in the right cerebral peduncle	IDP.1466	AS	8	rs6953397,rs6953397,rs6953397,rs6953397,rs6953397,rs6953397,rs6953397,rs6953397	0.0110436	8.02353e-05	TRUE	1.6994e-46	43.753	1.14891	0.870391
ISOVF in the right anterior thalamic radiation	IDP.2103	SVS	11	rs8177186,rs8177186,rs8177186,rs8177186,rs8177186,rs8177186,rs8177186,rs8177186,rs8177186,rs8177186,rs8177186	0.0139514	0.000773734	TRUE	6.14158e-16	40.3115	1.38472	0.72217
ISOVF in the right cingulum cingulate gyrus part	IDP.2086	AS	11	rs9898671,rs9898671,rs9898671,rs9898671,rs9898671,rs9898671,rs9898671,rs9898671,rs9898671,rs9898671,rs9898671	0.0162538	0.000147668	TRUE	2.15138e-66	47.0748	1.12122	0.891882
FA in the left superior corona radiata	IDP.1477	AIS	14	rs8093416,rs8093416,rs8093416,rs8093416,rs8093416,rs8093416,rs8093416,rs8093416,rs8093416,rs8093416,rs8093416,rs8093416,rs8093416,rs8093416	0.0165623	0.000129517	TRUE	2.02183e-65	37.6989	1.13037	0.884668
FA in the posterior limb of the left internal capsule	IDP.1471	AS	16	rs77520347,rs77520347,rs77520347,rs77520347,rs77520347,rs77520347,rs77520347,rs77520347,rs77520347,rs77520347,rs77520347,rs77520347,rs77520347,rs77520347,rs77520347,rs77520347	0.0238371	0.000149379	TRUE	1.98862e-100	47.8259	1.09909	0.909842
Thickness of the left fusiform gyrus	IDP.1026	AS	5	rs7575796,rs7575796,rs7575796,rs7575796,rs7575796	0.00601625	8.17187e-05	TRUE	1.10055e-24	38.6886	1.20692	0.828557
FA in the left inferior cerebellar peduncle	IDP.1463	AIS	6	rs67827860,rs67827860,rs67827860,rs67827860,rs67827860,rs67827860	0.00768369	7.35562e-05	TRUE	1.71318e-30	40.4558	1.19711	0.835346
MD in the left superior longitudinal fasciculus	IDP.1643	AS	31	rs9374289,rs9374289,rs9374289,rs9374289,rs9374289,rs9374289,rs9374289,rs9374289,rs9374289,rs9374289,rs9374289,rs9374289,rs9374289,rs9374289,rs9374289,rs9374289,rs9374289,rs9374289,rs9374289,rs9374289,rs9374289,rs9374289,rs9374289,rs9374289,rs9374289,rs9374289,rs9374289,rs9374289,rs9374289,rs9374289,rs9374289	0.0445937	0.000429135	TRUE	1.6161e-181	47.1592	1.07152	0.933253
MD in the forceps minor	IDP.1805	AS	21	rs9635723,rs9635723,rs9635723,rs9635723,rs9635723,rs9635723,rs9635723,rs9635723,rs9635723,rs9635723,rs9635723,rs9635723,rs9635723,rs9635723,rs9635723,rs9635723,rs9635723,rs9635723,rs9635723,rs9635723,rs9635723	0.0380566	0.000177882	TRUE	1.64479e-164	59.0257	1.07764	0.927951
FA in the right medial lemniscus	IDP.1460	AS	6	rs74050914,rs74050914,rs74050914,rs74050914,rs74050914,rs74050914	0.00791807	6.60741e-05	TRUE	2.5085e-33	41.6976	1.17814	0.848796
MD in the left superior longitudinal fasciculus	IDP.1643	AIS	33	rs9374289,rs9374289,rs9374289,rs9374289,rs9374289,rs9374289,rs9374289,rs9374289,rs9374289,rs9374289,rs9374289,rs9374289,rs9374289,rs9374289,rs9374289,rs9374289,rs9374289,rs9374289,rs9374289,rs9374289,rs9374289,rs9374289,rs9374289,rs9374289,rs9374289,rs9374289,rs9374289,rs9374289,rs9374289,rs9374289,rs9374289,rs9374289,rs9374289	0.0471551	0.000613638	TRUE	8.41115e-177	46.9684	1.07533	0.92995
MD in the genu of corpus callosum	IDP.1604	SVS	15	rs940808,rs940808,rs940808,rs940808,rs940808,rs940808,rs940808,rs940808,rs940808,rs940808,rs940808,rs940808,rs940808,rs940808,rs940808	0.0238172	0.00120301	TRUE	5.36028e-27	50.9726	1.2829	0.779486
OD in the left cingulum hippocampus	IDP.2014	AIS	2	rs34457487,rs34457487	0.00226807	2.04886e-05	TRUE	4.30797e-10	35.6322	1.39256	0.718099
ICVF in the left posterior corona radiata	IDP.1929	AS	25	rs8076187,rs8076187,rs8076187,rs8076187,rs8076187,rs8076187,rs8076187,rs8076187,rs8076187,rs8076187,rs8076187,rs8076187,rs8076187,rs8076187,rs8076187,rs8076187,rs8076187,rs8076187,rs8076187,rs8076187,rs8076187,rs8076187,rs8076187,rs8076187,rs8076187	0.0433599	0.000242011	TRUE	2.14317e-185	56.7945	1.07257	0.932342
OD in the left inferior fronto-occipital fasciculus	IDP.2037	CES	8	rs7770034,rs7770034,rs7770034,rs7770034,rs7770034,rs7770034,rs7770034,rs7770034	0.00903933	0.000302232	TRUE	1.47581e-14	35.7383	1.42083	0.703813
Thickness of the right precentral gyrus	IDP.1077	CES	7	rs9559797,rs9559797,rs9559797,rs9559797,rs9559797,rs9559797,rs9559797	0.00704486	0.000194769	TRUE	3.8955e-12	32.3904	1.48865	0.671747
ISOVF in the right superior longitudinal fasciculus	IDP.2092	AS	14	rs798528,rs798528,rs798528,rs798528,rs798528,rs798528,rs798528,rs798528,rs798528,rs798528,rs798528,rs798528,rs798528,rs798528	0.026209	0.000136867	TRUE	4.96578e-112	60.2458	1.09429	0.913834
MD in the right sagittal stratum	IDP.1632	SVS	19	rs9899380,rs9899380,rs9899380,rs9899380,rs9899380,rs9899380,rs9899380,rs9899380,rs9899380,rs9899380,rs9899380,rs9899380,rs9899380,rs9899380,rs9899380,rs9899380,rs9899380,rs9899380,rs9899380	0.0333559	0.001549	TRUE	2.80854e-38	56.9091	1.2343	0.810176
ISOVF in the retrolenticular part of the left internal capsule	IDP.2073	AS	4	rs7196814,rs7196814,rs7196814,rs7196814	0.00583091	2.07303e-05	TRUE	1.35181e-26	45.9637	1.21051	0.826101
ISOVF in the left superior longitudinal fasciculus	IDP.2093	AS	17	rs8081395,rs8081395,rs8081395,rs8081395,rs8081395,rs8081395,rs8081395,rs8081395,rs8081395,rs8081395,rs8081395,rs8081395,rs8081395,rs8081395,rs8081395,rs8081395,rs8081395	0.024726	0.000205874	TRUE	1.59772e-101	46.7321	1.09721	0.911404
FA in the left cingulum hippocampus	IDP.1489	AIS	6	rs79170240,rs79170240,rs79170240,rs79170240,rs79170240,rs79170240	0.00724904	9.50988e-05	TRUE	7.37679e-28	38.1486	1.20349	0.830914
ISOVF in the anterior limb of the left internal capsule	IDP.2069	CES	10	rs72976977,rs72976977,rs72976977,rs72976977,rs72976977,rs72976977,rs72976977,rs72976977,rs72976977,rs72976977	0.0116464	0.000938392	TRUE	1.829e-14	36.9321	1.36267	0.733855
ISOVF in the splenium of corpus callosum	IDP.2056	AS	2	rs185307128,rs185307128	0.00236211	2.13785e-05	TRUE	6.61431e-11	37.1152	1.35005	0.740715
MD in the splenium of corpus callosum	IDP.1606	AIS	15	rs79928268,rs79928268,rs79928268,rs79928268,rs79928268,rs79928268,rs79928268,rs79928268,rs79928268,rs79928268,rs79928268,rs79928268,rs79928268,rs79928268,rs79928268	0.0222044	0.00018518	TRUE	6.87812e-87	47.4422	1.11164	0.899573
FA in the right anterior corona radiata	IDP.1474	SVS	14	rs798562,rs798562,rs798562,rs798562,rs798562,rs798562,rs798562,rs798562,rs798562,rs798562,rs798562,rs798562,rs798562,rs798562	0.0169709	0.000819046	TRUE	7.93713e-20	38.6455	1.34329	0.744442
MD in the body of corpus callosum	IDP.1605	SVS	13	rs796001,rs796001,rs796001,rs796001,rs796001,rs796001,rs796001,rs796001,rs796001,rs796001,rs796001,rs796001,rs796001	0.0182155	0.00130586	TRUE	7.3583e-19	44.7269	1.32958	0.752116
OD in the right external capsule	IDP.2009	AIS	17	rs9467713,rs9467713,rs9467713,rs9467713,rs9467713,rs9467713,rs9467713,rs9467713,rs9467713,rs9467713,rs9467713,rs9467713,rs9467713,rs9467713,rs9467713,rs9467713,rs9467713	0.0222679	0.000138609	TRUE	1.83762e-89	41.9794	1.11147	0.899709
FA in the right anterior corona radiata	IDP.1474	AS	18	rs798562,rs798562,rs798562,rs798562,rs798562,rs798562,rs798562,rs798562,rs798562,rs798562,rs798562,rs798562,rs798562,rs798562,rs798562,rs798562,rs798562,rs798562	0.0217817	0.000245691	TRUE	1.23229e-86	38.7631	1.10389	0.905887
ISOVF in the left inferior fronto-occipital fasciculus	IDP.2112	SVS	14	rs9739560,rs9739560,rs9739560,rs9739560,rs9739560,rs9739560,rs9739560,rs9739560,rs9739560,rs9739560,rs9739560,rs9739560,rs9739560,rs9739560	0.0273391	0.00081807	TRUE	8.25233e-35	62.9136	1.26178	0.792532
ISOVF in the left superior thalamic radiation	IDP.2123	SVS	13	rs9739560,rs9739560,rs9739560,rs9739560,rs9739560,rs9739560,rs9739560,rs9739560,rs9739560,rs9739560,rs9739560,rs9739560,rs9739560	0.0185331	0.000509344	TRUE	2.33115e-24	45.5204	1.32632	0.753966
MD in the posterior limb of the left internal capsule	IDP.1621	AS	10	rs72764411,rs72764411,rs72764411,rs72764411,rs72764411,rs72764411,rs72764411,rs72764411,rs72764411,rs72764411	0.0157468	5.10661e-05	TRUE	9.66913e-70	50.1451	1.12327	0.890255
OD in the right medial lemniscus	IDP.1985	SVS	4	rs4243824,rs4243824,rs4243824,rs4243824	0.00432917	0.000325444	TRUE	2.05146e-05	34.0751	1.79378	0.557483
ICVF in the genu of corpus callosum	IDP.1904	SVS	27	rs8014204,rs8014204,rs8014204,rs8014204,rs8014204,rs8014204,rs8014204,rs8014204,rs8014204,rs8014204,rs8014204,rs8014204,rs8014204,rs8014204,rs8014204,rs8014204,rs8014204,rs8014204,rs8014204,rs8014204,rs8014204,rs8014204,rs8014204,rs8014204,rs8014204,rs8014204,rs8014204	0.0587279	0.00211877	TRUE	1.00654e-71	72.3878	1.17192	0.853299
ISOVF in the right superior corona radiata	IDP.2076	SVS	6	rs9739560,rs9739560,rs9739560,rs9739560,rs9739560,rs9739560	0.00957346	0.00043299	TRUE	5.78591e-12	50.499	1.48132	0.675075
MD in the posterior limb of the right internal capsule	IDP.1620	AIS	10	rs67827860,rs67827860,rs67827860,rs67827860,rs67827860,rs67827860,rs67827860,rs67827860,rs67827860,rs67827860	0.0169804	0.000128624	TRUE	3.03286e-67	54.1419	1.12865	0.886014
ISOVF in the left acoustic radiation	IDP.2100	AS	6	rs798500,rs798500,rs798500,rs798500,rs798500,rs798500	0.00904107	4.53714e-05	TRUE	1.75121e-39	47.6631	1.16581	0.857772
FA in the left inferior cerebellar peduncle	IDP.1463	AS	7	rs67827860,rs67827860,rs67827860,rs67827860,rs67827860,rs67827860,rs67827860	0.00865982	5.12464e-05	TRUE	2.06343e-37	39.119	1.16971	0.854914
ICVF in the left superior fronto-occipital fasciculus	IDP.1945	SVS	11	rs798562,rs798562,rs798562,rs798562,rs798562,rs798562,rs798562,rs798562,rs798562,rs798562,rs798562	0.0178903	0.000929739	TRUE	1.99484e-20	51.9026	1.333	0.750185
ICVF in the right tapetum	IDP.1948	AIS	18	rs76566528,rs76566528,rs76566528,rs76566528,rs76566528,rs76566528,rs76566528,rs76566528,rs76566528,rs76566528,rs76566528,rs76566528,rs76566528,rs76566528,rs76566528,rs76566528,rs76566528,rs76566528	0.0258749	0.000272104	TRUE	8.64312e-99	46.2394	1.10301	0.906613
FA in the left external capsule	IDP.1485	AS	15	rs7196814,rs7196814,rs7196814,rs7196814,rs7196814,rs7196814,rs7196814,rs7196814,rs7196814,rs7196814,rs7196814,rs7196814,rs7196814,rs7196814,rs7196814	0.0214602	0.000148023	TRUE	1.03932e-89	45.8179	1.10471	0.905219
MD in the left anterior thalamic radiation	IDP.1796	SVS	9	rs76088357,rs76088357,rs76088357,rs76088357,rs76088357,rs76088357,rs76088357,rs76088357,rs76088357	0.015846	0.0007452	TRUE	1.00784e-18	56.0761	1.35718	0.736821
MD in the right cerebral peduncle	IDP.1616	CES	4	rs7733216,rs7733216,rs7733216,rs7733216	0.00540598	0.000319327	TRUE	3.76779e-08	42.5985	1.5749	0.634962
MD in the right sagittal stratum	IDP.1632	AIS	20	rs9899380,rs9899380,rs9899380,rs9899380,rs9899380,rs9899380,rs9899380,rs9899380,rs9899380,rs9899380,rs9899380,rs9899380,rs9899380,rs9899380,rs9899380,rs9899380,rs9899380,rs9899380,rs9899380,rs9899380	0.0343824	0.000279228	TRUE	4.97406e-135	55.7848	1.08877	0.918467
ICVF in the right tapetum	IDP.1948	SVS	17	rs9911690,rs9911690,rs9911690,rs9911690,rs9911690,rs9911690,rs9911690,rs9911690,rs9911690,rs9911690,rs9911690,rs9911690,rs9911690,rs9911690,rs9911690,rs9911690,rs9911690	0.0247656	0.00184857	TRUE	7.3518e-25	46.8087	1.27673	0.783251
ISOVF in the left cingulum cingulate gyrus part	IDP.2087	AIS	10	rs798496,rs798496,rs798496,rs798496,rs798496,rs798496,rs798496,rs798496,rs798496,rs798496	0.0124952	8.55061e-05	TRUE	2.96901e-50	39.658	1.15152	0.868418
ISOVF in the retrolenticular part of the right internal capsule	IDP.2072	SVS	3	rs7039165,rs7039165,rs7039165	0.00438325	8.53176e-05	TRUE	3.78239e-07	46.0043	1.78731	0.5595
ICVF in the left sagittal stratum	IDP.1933	SVS	36	rs9899380,rs9899380,rs9899380,rs9899380,rs9899380,rs9899380,rs9899380,rs9899380,rs9899380,rs9899380,rs9899380,rs9899380,rs9899380,rs9899380,rs9899380,rs9899380,rs9899380,rs9899380,rs9899380,rs9899380,rs9899380,rs9899380,rs9899380,rs9899380,rs9899380,rs9899380,rs9899380,rs9899380,rs9899380,rs9899380,rs9899380,rs9899380,rs9899380,rs9899380,rs9899380,rs9899380	0.0702962	0.00314432	TRUE	5.30476e-82	65.7735	1.15605	0.865017
MO in the left inferior cerebellar peduncle	IDP.1538	AIS	2	rs1553953,rs1553953	0.00217569	1.4255e-05	TRUE	5.33083e-10	34.1785	1.40229	0.71312
FA in the right external capsule	IDP.1484	AS	12	rs79337528,rs79337528,rs79337528,rs79337528,rs79337528,rs79337528,rs79337528,rs79337528,rs79337528,rs79337528,rs79337528,rs79337528	0.0174586	9.95803e-05	TRUE	2.72709e-74	46.4066	1.11673	0.895473
FA in the left inferior fronto-occipital fasciculus	IDP.1512	SVS	17	rs9608859,rs9608859,rs9608859,rs9608859,rs9608859,rs9608859,rs9608859,rs9608859,rs9608859,rs9608859,rs9608859,rs9608859,rs9608859,rs9608859,rs9608859,rs9608859,rs9608859	0.0286227	0.0013795	TRUE	1.21276e-32	54.312	1.25514	0.796722
MD in the right inferior fronto-occipital fasciculus	IDP.1807	AS	20	rs9915591,rs9915591,rs9915591,rs9915591,rs9915591,rs9915591,rs9915591,rs9915591,rs9915591,rs9915591,rs9915591,rs9915591,rs9915591,rs9915591,rs9915591,rs9915591,rs9915591,rs9915591,rs9915591,rs9915591	0.0348372	0.000222686	TRUE	8.61705e-147	56.5439	1.08129	0.924819
ICVF in the right posterior thalamic radiation	IDP.1930	SVS	28	rs9899380,rs9899380,rs9899380,rs9899380,rs9899380,rs9899380,rs9899380,rs9899380,rs9899380,rs9899380,rs9899380,rs9899380,rs9899380,rs9899380,rs9899380,rs9899380,rs9899380,rs9899380,rs9899380,rs9899380,rs9899380,rs9899380,rs9899380,rs9899380,rs9899380,rs9899380,rs9899380,rs9899380	0.0555309	0.00218815	TRUE	2.20771e-66	65.7752	1.17721	0.849463
FA in the genu of corpus callosum	IDP.1454	SVS	12	rs7590302,rs7590302,rs7590302,rs7590302,rs7590302,rs7590302,rs7590302,rs7590302,rs7590302,rs7590302,rs7590302,rs7590302	0.0173764	0.00138674	TRUE	2.13797e-17	46.1849	1.33865	0.747023
ISOVF in the retrolenticular part of the left internal capsule	IDP.2073	AIS	4	rs7196814,rs7196814,rs7196814,rs7196814	0.00583091	3.45987e-05	TRUE	1.59111e-24	45.9637	1.2294	0.813402
ICVF in the left superior corona radiata	IDP.1927	SVS	26	rs9487744,rs9487744,rs9487744,rs9487744,rs9487744,rs9487744,rs9487744,rs9487744,rs9487744,rs9487744,rs9487744,rs9487744,rs9487744,rs9487744,rs9487744,rs9487744,rs9487744,rs9487744,rs9487744,rs9487744,rs9487744,rs9487744,rs9487744,rs9487744,rs9487744,rs9487744	0.0462037	0.00299146	TRUE	4.82389e-48	58.3659	1.19585	0.836223
FA in the posterior limb of the right internal capsule	IDP.1470	SVS	23	rs9984070,rs9984070,rs9984070,rs9984070,rs9984070,rs9984070,rs9984070,rs9984070,rs9984070,rs9984070,rs9984070,rs9984070,rs9984070,rs9984070,rs9984070,rs9984070,rs9984070,rs9984070,rs9984070,rs9984070,rs9984070,rs9984070,rs9984070	0.0313932	0.0017956	TRUE	4.74492e-34	44.149	1.24233	0.80494
Cortical surface area of the left supramarginal gyrus	IDP.0678	SVS	8	rs73135321,rs73135321,rs73135321,rs73135321,rs73135321,rs73135321,rs73135321,rs73135321	0.0122593	0.000785529	TRUE	1.18216e-13	49.5792	1.41515	0.706641
ISOVF in the left inferior longitudinal fasciculus	IDP.2114	SVS	17	rs9898671,rs9898671,rs9898671,rs9898671,rs9898671,rs9898671,rs9898671,rs9898671,rs9898671,rs9898671,rs9898671,rs9898671,rs9898671,rs9898671,rs9898671,rs9898671,rs9898671	0.0314455	0.00114058	TRUE	2.48257e-38	59.8404	1.24211	0.805083
ISOVF in the genu of corpus callosum	IDP.2054	AS	5	rs916784,rs916784,rs916784,rs916784,rs916784	0.00619597	0.000107352	TRUE	2.88844e-24	39.0872	1.20361	0.830836
FA in the right tapetum	IDP.1498	AIS	13	rs9402980,rs9402980,rs9402980,rs9402980,rs9402980,rs9402980,rs9402980,rs9402980,rs9402980,rs9402980,rs9402980,rs9402980,rs9402980	0.0175791	0.000179457	TRUE	1.56696e-67	43.1378	1.12631	0.887857
Volume of the right precentral gyrus	IDP.0399	SVS	4	rs6804164,rs6804164,rs6804164,rs6804164	0.0193473	0.00051909	TRUE	1.33322e-25	157.633	1.31839	0.758502
ISOVF in the right external capsule	IDP.2084	AS	9	rs9308343,rs9308343,rs9308343,rs9308343,rs9308343,rs9308343,rs9308343,rs9308343,rs9308343	0.0155587	0.000140159	TRUE	1.17677e-63	55.0405	1.12406	0.889631
Cortical surface area of the left precentral gyrus	IDP.0671	AIS	6	rs72704117,rs72704117,rs72704117,rs72704117,rs72704117,rs72704117	0.0220175	3.55157e-05	TRUE	4.72662e-97	119.912	1.11214	0.899169
ISOVF in the right inferior longitudinal fasciculus	IDP.2115	AIS	25	rs9739560,rs9739560,rs9739560,rs9739560,rs9739560,rs9739560,rs9739560,rs9739560,rs9739560,rs9739560,rs9739560,rs9739560,rs9739560,rs9739560,rs9739560,rs9739560,rs9739560,rs9739560,rs9739560,rs9739560,rs9739560,rs9739560,rs9739560,rs9739560,rs9739560	0.0457473	0.000287678	TRUE	1.03551e-184	60.0713	1.07652	0.92892
FA in the right tapetum	IDP.1498	AS	13	rs9402980,rs9402980,rs9402980,rs9402980,rs9402980,rs9402980,rs9402980,rs9402980,rs9402980,rs9402980,rs9402980,rs9402980,rs9402980	0.0175791	0.000157503	TRUE	7.90962e-72	43.1378	1.1163	0.895814
ISOVF in the retrolenticular part of the right internal capsule	IDP.2072	AS	3	rs7039165,rs7039165,rs7039165	0.00438325	1.36342e-05	TRUE	1.58129e-20	46.0043	1.2465	0.802248
OD in the right anterior thalamic radiation	IDP.2028	AIS	6	rs958073,rs958073,rs958073,rs958073,rs958073,rs958073	0.0069034	8.82247e-05	TRUE	1.1e-26	36.316	1.20901	0.82712
ICVF in the left anterior corona radiata	IDP.1925	SVS	33	rs9608859,rs9608859,rs9608859,rs9608859,rs9608859,rs9608859,rs9608859,rs9608859,rs9608859,rs9608859,rs9608859,rs9608859,rs9608859,rs9608859,rs9608859,rs9608859,rs9608859,rs9608859,rs9608859,rs9608859,rs9608859,rs9608859,rs9608859,rs9608859,rs9608859,rs9608859,rs9608859,rs9608859,rs9608859,rs9608859,rs9608859,rs9608859,rs9608859	0.0549188	0.00321158	TRUE	4.64838e-59	55.1486	1.17828	0.848693
Cortical surface area of the left fusiform gyrus	IDP.0654	CES	3	rs6658111,rs6658111,rs6658111	0.00619684	6.50151e-05	TRUE	2.47458e-12	66.4312	1.52841	0.654276
MO in the left inferior cerebellar peduncle	IDP.1538	SVS	2	rs1553953,rs1553953	0.00217569	7.39052e-05	TRUE	0.000699651	34.1785	2.28018	0.438562
OD in the right sagittal stratum	IDP.2007	AIS	3	rs7442779,rs7442779,rs7442779	0.00353396	2.14309e-05	TRUE	1.96525e-15	37.0589	1.30381	0.766984
MD in the right acoustic radiation	IDP.1795	AS	7	rs798485,rs798485,rs798485,rs798485,rs798485,rs798485,rs798485	0.0109487	7.74424e-05	TRUE	3.23054e-46	49.5709	1.1496	0.869871
MD in the left inferior fronto-occipital fasciculus	IDP.1806	AIS	21	rs9748135,rs9748135,rs9748135,rs9748135,rs9748135,rs9748135,rs9748135,rs9748135,rs9748135,rs9748135,rs9748135,rs9748135,rs9748135,rs9748135,rs9748135,rs9748135,rs9748135,rs9748135,rs9748135,rs9748135,rs9748135	0.036534	0.00023964	TRUE	2.13333e-146	56.574	1.08601	0.920804
ICVF in the right posterior corona radiata	IDP.1928	AIS	26	rs9899380,rs9899380,rs9899380,rs9899380,rs9899380,rs9899380,rs9899380,rs9899380,rs9899380,rs9899380,rs9899380,rs9899380,rs9899380,rs9899380,rs9899380,rs9899380,rs9899380,rs9899380,rs9899380,rs9899380,rs9899380,rs9899380,rs9899380,rs9899380,rs9899380,rs9899380	0.0420402	0.000314147	TRUE	6.73703e-167	52.8743	1.07995	0.925968
MD in the posterior limb of the left internal capsule	IDP.1621	AIS	10	rs72764411,rs72764411,rs72764411,rs72764411,rs72764411,rs72764411,rs72764411,rs72764411,rs72764411,rs72764411	0.0157468	9.29219e-05	TRUE	8.56348e-64	50.1451	1.13391	0.881902
MD in the right tapetum	IDP.1648	AS	11	rs7596872,rs7596872,rs7596872,rs7596872,rs7596872,rs7596872,rs7596872,rs7596872,rs7596872,rs7596872,rs7596872	0.014113	0.000173831	TRUE	6.87916e-56	40.7874	1.13065	0.884447
FA in the left superior thalamic radiation	IDP.1523	AS	16	rs798551,rs798551,rs798551,rs798551,rs798551,rs798551,rs798551,rs798551,rs798551,rs798551,rs798551,rs798551,rs798551,rs798551,rs798551,rs798551	0.0246475	0.000232198	TRUE	6.0251e-100	49.4926	1.09737	0.91127
FA in the right cerebral peduncle	IDP.1466	SVS	8	rs6953397,rs6953397,rs6953397,rs6953397,rs6953397,rs6953397,rs6953397,rs6953397	0.01116	0.0010991	TRUE	8.78438e-11	44.2192	1.43898	0.694936
ISOVF in the left corticospinal tract	IDP.2059	CES	5	rs7313073,rs7313073,rs7313073,rs7313073,rs7313073	0.00647194	0.000167052	TRUE	2.45701e-11	40.8389	1.51454	0.660268
MO in the right inferior cerebellar peduncle	IDP.1537	AIS	2	rs16939343,rs16939343	0.00214543	6.86673e-06	TRUE	2.46742e-10	33.7024	1.40562	0.711428
FA in the left posterior thalamic radiation	IDP.1481	SVS	13	rs9388446,rs9388446,rs9388446,rs9388446,rs9388446,rs9388446,rs9388446,rs9388446,rs9388446,rs9388446,rs9388446,rs9388446,rs9388446	0.0181771	0.000913509	TRUE	6.39529e-21	44.6335	1.32997	0.751896
MO in the left sagittal stratum	IDP.1558	AIS	2	rs12367619,rs12367619	0.0023153	1.33478e-05	TRUE	1.19159e-10	36.3755	1.38785	0.720537
MD in the left posterior corona radiata	IDP.1629	SVS	19	rs79569934,rs79569934,rs79569934,rs79569934,rs79569934,rs79569934,rs79569934,rs79569934,rs79569934,rs79569934,rs79569934,rs79569934,rs79569934,rs79569934,rs79569934,rs79569934,rs79569934,rs79569934,rs79569934	0.0280337	0.00192279	TRUE	8.04452e-29	47.5641	1.25813	0.794831
Thickness of the right lateral occipital cortex	IDP.1064	CES	9	rs9933149,rs9933149,rs9933149,rs9933149,rs9933149,rs9933149,rs9933149,rs9933149,rs9933149	0.0104664	0.000373668	TRUE	1.6901e-16	37.5565	1.38599	0.721504
ISOVF in the left anterior thalamic radiation	IDP.2102	SVS	9	rs72714295,rs72714295,rs72714295,rs72714295,rs72714295,rs72714295,rs72714295,rs72714295,rs72714295	0.0124407	0.000531453	TRUE	2.42681e-15	43.8698	1.41156	0.708438
ISOVF in the retrolenticular part of the right internal capsule	IDP.2072	AIS	3	rs7039165,rs7039165,rs7039165	0.00438325	3.07936e-05	TRUE	1.46332e-18	46.0043	1.26897	0.788041
MO in the left cingulum cingulate gyrus part	IDP.1562	AIS	8	rs7942990,rs7942990,rs7942990,rs7942990,rs7942990,rs7942990,rs7942990,rs7942990	0.00969241	2.86726e-05	TRUE	1.20095e-41	38.3477	1.17373	0.851984
Cortical surface area of the left entorhinal cortex	IDP.0653	SVS	4	rs8079695,rs8079695,rs8079695,rs8079695	0.00658155	0.000488355	TRUE	1.27356e-07	52.9368	1.60624	0.622572
ISOVF in the splenium of corpus callosum	IDP.2056	AIS	2	rs185307128,rs185307128	0.00236211	6.42347e-06	TRUE	2.51507e-11	37.1152	1.38331	0.722904
FA in the right superior fronto-occipital fasciculus	IDP.1494	SVS	9	rs9398787,rs9398787,rs9398787,rs9398787,rs9398787,rs9398787,rs9398787,rs9398787,rs9398787	0.0118941	0.000434933	TRUE	3.02512e-15	41.9219	1.42265	0.702912
OD in the right inferior cerebellar peduncle	IDP.1987	AIS	4	rs7838141,rs7838141,rs7838141,rs7838141	0.00424139	2.46395e-05	TRUE	2.77779e-18	33.3814	1.27399	0.784935
ISOVF in the right acoustic radiation	IDP.2101	AIS	9	rs80246513,rs80246513,rs80246513,rs80246513,rs80246513,rs80246513,rs80246513,rs80246513,rs80246513	0.0121095	0.000100299	TRUE	6.67416e-48	42.6875	1.15409	0.866484
FA in the left medial lemniscus	IDP.1461	SVS	6	rs6577428,rs6577428,rs6577428,rs6577428,rs6577428,rs6577428	0.00641591	0.000134475	TRUE	9.78297e-10	33.7363	1.61605	0.618794
MO in the left inferior cerebellar peduncle	IDP.1538	AS	2	rs1553953,rs1553953	0.00217569	4.64255e-06	TRUE	3.98864e-11	34.1785	1.36717	0.731437
MD in the left anterior corona radiata	IDP.1625	SVS	20	rs75214355,rs75214355,rs75214355,rs75214355,rs75214355,rs75214355,rs75214355,rs75214355,rs75214355,rs75214355,rs75214355,rs75214355,rs75214355,rs75214355,rs75214355,rs75214355,rs75214355,rs75214355,rs75214355,rs75214355	0.033288	0.00167157	TRUE	2.04098e-37	53.9466	1.23457	0.81
Cortical surface area of the right lateral orbital frontal cortex	IDP.0693	AS	5	rs7222314,rs7222314,rs7222314,rs7222314,rs7222314	0.00674957	8.59686e-05	TRUE	1.00525e-27	43.4362	1.1943	0.837311
MD in the left cerebral peduncle	IDP.1617	AS	4	rs4685022,rs4685022,rs4685022,rs4685022	0.00559137	1.67557e-05	TRUE	8.147e-26	44.0669	1.21541	0.822764
ISOVF in the forceps minor	IDP.2111	AS	9	rs6006426,rs6006426,rs6006426,rs6006426,rs6006426,rs6006426,rs6006426,rs6006426,rs6006426	0.0134735	0.000111899	TRUE	9.92394e-56	47.5612	1.13391	0.881903
MD in the genu of corpus callosum	IDP.1604	AS	16	rs940808,rs940808,rs940808,rs940808,rs940808,rs940808,rs940808,rs940808,rs940808,rs940808,rs940808,rs940808,rs940808,rs940808,rs940808,rs940808	0.0255334	0.000184125	TRUE	2.89816e-106	51.3188	1.09559	0.912752
MD in the left superior corona radiata	IDP.1627	SVS	20	rs884570,rs884570,rs884570,rs884570,rs884570,rs884570,rs884570,rs884570,rs884570,rs884570,rs884570,rs884570,rs884570,rs884570,rs884570,rs884570,rs884570,rs884570,rs884570,rs884570	0.0299924	0.00194083	TRUE	2.3354e-31	48.4389	1.24857	0.800915
MD in the right superior corona radiata	IDP.1626	SVS	25	rs8076187,rs8076187,rs8076187,rs8076187,rs8076187,rs8076187,rs8076187,rs8076187,rs8076187,rs8076187,rs8076187,rs8076187,rs8076187,rs8076187,rs8076187,rs8076187,rs8076187,rs8076187,rs8076187,rs8076187,rs8076187,rs8076187,rs8076187,rs8076187,rs8076187	0.0350881	0.00163704	TRUE	3.47958e-40	45.5687	1.22783	0.814448
ISOVF in the body of corpus callosum	IDP.2055	SVS	15	rs6772621,rs6772621,rs6772621,rs6772621,rs6772621,rs6772621,rs6772621,rs6772621,rs6772621,rs6772621,rs6772621,rs6772621,rs6772621,rs6772621,rs6772621	0.0168646	0.00101124	TRUE	1.44826e-18	35.8365	1.34454	0.743749
FA in the left inferior cerebellar peduncle	IDP.1463	SVS	7	rs67827860,rs67827860,rs67827860,rs67827860,rs67827860,rs67827860,rs67827860	0.00865982	0.000651375	TRUE	1.58839e-09	39.119	1.51155	0.661574
MD in the left inferior longitudinal fasciculus	IDP.1808	AIS	21	rs9471172,rs9471172,rs9471172,rs9471172,rs9471172,rs9471172,rs9471172,rs9471172,rs9471172,rs9471172,rs9471172,rs9471172,rs9471172,rs9471172,rs9471172,rs9471172,rs9471172,rs9471172,rs9471172,rs9471172,rs9471172	0.034619	0.000268388	TRUE	1.4385e-136	53.5015	1.08846	0.918733
MD in the left inferior longitudinal fasciculus	IDP.1808	AS	20	rs9471172,rs9471172,rs9471172,rs9471172,rs9471172,rs9471172,rs9471172,rs9471172,rs9471172,rs9471172,rs9471172,rs9471172,rs9471172,rs9471172,rs9471172,rs9471172,rs9471172,rs9471172,rs9471172,rs9471172	0.0332353	0.000194074	TRUE	5.10381e-141	53.8558	1.08331	0.9231
ISOVF in the right anterior corona radiata	IDP.2074	AIS	13	rs9739560,rs9739560,rs9739560,rs9739560,rs9739560,rs9739560,rs9739560,rs9739560,rs9739560,rs9739560,rs9739560,rs9739560,rs9739560	0.021695	0.000242171	TRUE	2.50085e-82	53.4592	1.11301	0.898463
MD in the right posterior thalamic radiation	IDP.1630	SVS	18	rs9899380,rs9899380,rs9899380,rs9899380,rs9899380,rs9899380,rs9899380,rs9899380,rs9899380,rs9899380,rs9899380,rs9899380,rs9899380,rs9899380,rs9899380,rs9899380,rs9899380,rs9899380	0.0290456	0.00133469	TRUE	1.59019e-33	52.0762	1.25306	0.798048
ICVF in the left posterior thalamic radiation	IDP.1931	AS	22	rs9899380,rs9899380,rs9899380,rs9899380,rs9899380,rs9899380,rs9899380,rs9899380,rs9899380,rs9899380,rs9899380,rs9899380,rs9899380,rs9899380,rs9899380,rs9899380,rs9899380,rs9899380,rs9899380,rs9899380,rs9899380,rs9899380	0.0463607	0.000335175	TRUE	3.08256e-194	69.2326	1.0701	0.934495
ISOVF in the right superior longitudinal fasciculus	IDP.2092	SVS	17	rs9739560,rs9739560,rs9739560,rs9739560,rs9739560,rs9739560,rs9739560,rs9739560,rs9739560,rs9739560,rs9739560,rs9739560,rs9739560,rs9739560,rs9739560,rs9739560,rs9739560	0.0301203	0.00101403	TRUE	2.38685e-37	57.2425	1.24798	0.801295
ISOVF in the retrolenticular part of the left internal capsule	IDP.2073	SVS	4	rs7196814,rs7196814,rs7196814,rs7196814	0.00583091	9.49696e-05	TRUE	2.80173e-09	45.9637	1.65449	0.604417
ISOVF in the body of corpus callosum	IDP.2055	AIS	15	rs6772621,rs6772621,rs6772621,rs6772621,rs6772621,rs6772621,rs6772621,rs6772621,rs6772621,rs6772621,rs6772621,rs6772621,rs6772621,rs6772621,rs6772621	0.0168646	0.000272719	TRUE	3.06901e-61	35.8365	1.12912	0.885645
ICVF in the right anterior corona radiata	IDP.1924	SVS	30	rs9608859,rs9608859,rs9608859,rs9608859,rs9608859,rs9608859,rs9608859,rs9608859,rs9608859,rs9608859,rs9608859,rs9608859,rs9608859,rs9608859,rs9608859,rs9608859,rs9608859,rs9608859,rs9608859,rs9608859,rs9608859,rs9608859,rs9608859,rs9608859,rs9608859,rs9608859,rs9608859,rs9608859,rs9608859,rs9608859	0.0499363	0.0029063	TRUE	1.04201e-53	54.8758	1.18774	0.841938
ISOVF in the left anterior thalamic radiation	IDP.2102	CES	10	rs7708285,rs7708285,rs7708285,rs7708285,rs7708285,rs7708285,rs7708285,rs7708285,rs7708285,rs7708285	0.0129044	0.000759881	TRUE	1.44087e-17	40.9722	1.34175	0.745296
OD in the left inferior cerebellar peduncle	IDP.1988	AIS	3	rs714392,rs714392,rs714392	0.00390755	4.53493e-05	TRUE	6.27449e-16	40.9915	1.28697	0.777019
ISOVF in the left inferior fronto-occipital fasciculus	IDP.2112	AIS	14	rs9739560,rs9739560,rs9739560,rs9739560,rs9739560,rs9739560,rs9739560,rs9739560,rs9739560,rs9739560,rs9739560,rs9739560,rs9739560,rs9739560	0.0273391	0.000186225	TRUE	5.90302e-109	62.9136	1.10008	0.909028
MD in the splenium of corpus callosum	IDP.1606	AS	16	rs79928268,rs79928268,rs79928268,rs79928268,rs79928268,rs79928268,rs79928268,rs79928268,rs79928268,rs79928268,rs79928268,rs79928268,rs79928268,rs79928268,rs79928268,rs79928268	0.0232936	0.00019501	TRUE	1.32449e-95	46.7096	1.1003	0.908846
OD in the right cerebral peduncle	IDP.1991	AS	11	rs7040561,rs7040561,rs7040561,rs7040561,rs7040561,rs7040561,rs7040561,rs7040561,rs7040561,rs7040561,rs7040561	0.0171604	0.000140032	TRUE	8.67696e-71	49.7455	1.1178	0.894618
MO in the right sagittal stratum	IDP.1557	AS	4	rs13143980,rs13143980,rs13143980,rs13143980	0.00527699	3.3775e-05	TRUE	3.0041e-23	41.5771	1.22239	0.818068
ISOVF in the right inferior fronto-occipital fasciculus	IDP.2113	AS	17	rs847100,rs847100,rs847100,rs847100,rs847100,rs847100,rs847100,rs847100,rs847100,rs847100,rs847100,rs847100,rs847100,rs847100,rs847100,rs847100,rs847100	0.0310252	0.000147766	TRUE	1.27533e-133	59.0164	1.08634	0.920519
ISOVF in the left anterior corona radiata	IDP.2075	AS	10	rs79401775,rs79401775,rs79401775,rs79401775,rs79401775,rs79401775,rs79401775,rs79401775,rs79401775,rs79401775	0.0172435	0.000133712	TRUE	1.80178e-71	54.9934	1.11749	0.89486
OD in the left sagittal stratum	IDP.2008	AIS	4	rs17698176,rs17698176,rs17698176,rs17698176	0.00498825	0.000116639	TRUE	4.12169e-18	39.2897	1.25018	0.799884
MD in the left tapetum	IDP.1649	SVS	11	rs74957179,rs74957179,rs74957179,rs74957179,rs74957179,rs74957179,rs74957179,rs74957179,rs74957179,rs74957179,rs74957179	0.0123008	0.00054872	TRUE	4.97264e-15	35.4847	1.41432	0.707055
Volume of the right lateral orbital frontal cortex	IDP.0387	AIS	7	rs57610830,rs57610830,rs57610830,rs57610830,rs57610830,rs57610830,rs57610830	0.00784033	7.35323e-05	TRUE	1.57119e-31	36.0768	1.19495	0.836853
OD in the left medial lemniscus	IDP.1986	SVS	5	rs7586842,rs7586842,rs7586842,rs7586842,rs7586842	0.00553835	0.000792955	TRUE	3.63743e-05	34.9156	1.67634	0.596539
MD in the right posterior corona radiata	IDP.1628	SVS	12	rs8081606,rs8081606,rs8081606,rs8081606,rs8081606,rs8081606,rs8081606,rs8081606,rs8081606,rs8081606,rs8081606,rs8081606	0.0190042	0.00131335	TRUE	7.35315e-20	50.5955	1.32166	0.756624
OD in the right inferior cerebellar peduncle	IDP.1987	SVS	4	rs7838141,rs7838141,rs7838141,rs7838141	0.00424139	0.000177257	TRUE	3.83596e-06	33.3814	1.8046	0.55414
ISOVF in the right corticospinal tract	IDP.2058	AS	6	rs929614,rs929614,rs929614,rs929614,rs929614,rs929614	0.00800404	3.51515e-05	TRUE	1.8652e-35	42.1529	1.1771	0.849546
ICVF in the right posterior thalamic radiation	IDP.1930	AS	29	rs9899380,rs9899380,rs9899380,rs9899380,rs9899380,rs9899380,rs9899380,rs9899380,rs9899380,rs9899380,rs9899380,rs9899380,rs9899380,rs9899380,rs9899380,rs9899380,rs9899380,rs9899380,rs9899380,rs9899380,rs9899380,rs9899380,rs9899380,rs9899380,rs9899380,rs9899380,rs9899380,rs9899380,rs9899380	0.0549608	0.000402146	TRUE	4.00678e-231	62.8153	1.0642	0.939673
Cortical surface area of the right parahippocampal gyrus	IDP.0697	CES	4	rs7838999,rs7838999,rs7838999,rs7838999	0.00520438	0.000345055	TRUE	1.09417e-07	41.8009	1.58869	0.629449
MD in the body of corpus callosum	IDP.1605	CES	12	rs796001,rs796001,rs796001,rs796001,rs796001,rs796001,rs796001,rs796001,rs796001,rs796001,rs796001,rs796001	0.0134897	0.000503038	TRUE	1.49399e-20	35.7138	1.33312	0.750119
Volume of the left hippocampus	IDP.0019	SVS	6	rs7040792,rs7040792,rs7040792,rs7040792,rs7040792,rs7040792	0.00980253	0.00046472	TRUE	3.12164e-12	54.7813	1.47449	0.6782
Thickness of the right lingual gyrus	IDP.1066	CES	4	rs2172128,rs2172128,rs2172128,rs2172128	0.00425197	0.000527513	TRUE	2.83124e-05	34.1191	1.66885	0.599216
ISOVF in the left superior longitudinal fasciculus	IDP.2093	AIS	19	rs9739560,rs9739560,rs9739560,rs9739560,rs9739560,rs9739560,rs9739560,rs9739560,rs9739560,rs9739560,rs9739560,rs9739560,rs9739560,rs9739560,rs9739560,rs9739560,rs9739560,rs9739560,rs9739560	0.0270461	0.000328854	TRUE	1.51923e-101	45.8422	1.10064	0.90856
FA in the right tapetum	IDP.1498	SVS	14	rs9402980,rs9402980,rs9402980,rs9402980,rs9402980,rs9402980,rs9402980,rs9402980,rs9402980,rs9402980,rs9402980,rs9402980,rs9402980,rs9402980	0.0185901	0.000640381	TRUE	2.29124e-23	42.4023	1.32575	0.754292
MD in the right tapetum	IDP.1648	SVS	11	rs76289965,rs76289965,rs76289965,rs76289965,rs76289965,rs76289965,rs76289965,rs76289965,rs76289965,rs76289965,rs76289965	0.0139732	0.00120531	TRUE	7.43739e-14	40.3777	1.38436	0.722353
MD in the left cerebral peduncle	IDP.1617	AIS	4	rs4685022,rs4685022,rs4685022,rs4685022	0.00559137	1.509e-05	TRUE	8.68603e-25	44.0669	1.2348	0.80985
OD in the right sagittal stratum	IDP.2007	AS	3	rs7442779,rs7442779,rs7442779	0.00353396	9.71236e-06	TRUE	5.94828e-17	37.0589	1.27812	0.7824
MO in the anterior limb of the right internal capsule	IDP.1543	AS	10	rs668799,rs668799,rs668799,rs668799,rs668799,rs668799,rs668799,rs668799,rs668799,rs668799	0.0127286	0.00012613	TRUE	8.67754e-52	40.4105	1.13803	0.878713
ISOVF in the left cingulum cingulate gyrus part	IDP.2087	AS	10	rs798496,rs798496,rs798496,rs798496,rs798496,rs798496,rs798496,rs798496,rs798496,rs798496	0.0124952	5.329e-05	TRUE	1.20202e-54	39.658	1.1394	0.877657
ISOVF in the right superior thalamic radiation	IDP.2124	AS	10	rs9739560,rs9739560,rs9739560,rs9739560,rs9739560,rs9739560,rs9739560,rs9739560,rs9739560,rs9739560	0.0149174	0.000211001	TRUE	5.437e-58	47.4604	1.12686	0.887421
MD in the left cingulum cingulate gyrus part	IDP.1637	AIS	18	rs9293304,rs9293304,rs9293304,rs9293304,rs9293304,rs9293304,rs9293304,rs9293304,rs9293304,rs9293304,rs9293304,rs9293304,rs9293304,rs9293304,rs9293304,rs9293304,rs9293304,rs9293304	0.035515	0.000206153	TRUE	1.02193e-143	64.1024	1.08728	0.919722
ISOVF in the right cerebral peduncle	IDP.2066	AS	3	rs6442409,rs6442409,rs6442409	0.00363879	3.45143e-05	TRUE	6.09673e-16	38.1626	1.27357	0.785192
ISOVF in the right superior thalamic radiation	IDP.2124	AIS	10	rs9739560,rs9739560,rs9739560,rs9739560,rs9739560,rs9739560,rs9739560,rs9739560,rs9739560,rs9739560	0.0149174	0.000165086	TRUE	5.85961e-57	47.4604	1.13783	0.878867
MD in the body of corpus callosum	IDP.1605	AIS	13	rs796001,rs796001,rs796001,rs796001,rs796001,rs796001,rs796001,rs796001,rs796001,rs796001,rs796001,rs796001,rs796001	0.0182155	0.000156844	TRUE	3.457e-71	44.7269	1.12395	0.889718
MO in the left cingulum cingulate gyrus part	IDP.1562	AS	7	rs7942990,rs7942990,rs7942990,rs7942990,rs7942990,rs7942990,rs7942990	0.00835484	9.33105e-06	TRUE	1.85301e-39	37.7286	1.17303	0.852492
ISOVF in the body of corpus callosum	IDP.2055	CES	15	rs6772621,rs6772621,rs6772621,rs6772621,rs6772621,rs6772621,rs6772621,rs6772621,rs6772621,rs6772621,rs6772621,rs6772621,rs6772621,rs6772621,rs6772621	0.0168646	0.000588836	TRUE	1.00441e-25	35.8365	1.29324	0.773251
Thickness of the left precuneus cortex	IDP.1044	AIS	8	rs8101493,rs8101493,rs8101493,rs8101493,rs8101493,rs8101493,rs8101493,rs8101493	0.00952212	9.61938e-05	TRUE	1.10941e-37	38.4027	1.17541	0.850769
ISOVF in the left anterior thalamic radiation	IDP.2102	AS	8	rs72714295,rs72714295,rs72714295,rs72714295,rs72714295,rs72714295,rs72714295,rs72714295	0.0103567	8.83893e-05	TRUE	4.85786e-43	41.0008	1.15412	0.866458
MD in the right tapetum	IDP.1648	AIS	12	rs76289965,rs76289965,rs76289965,rs76289965,rs76289965,rs76289965,rs76289965,rs76289965,rs76289965,rs76289965,rs76289965,rs76289965	0.0151194	0.000214821	TRUE	5.45508e-56	40.0944	1.13684	0.879628
Volume of the right hippocampus	IDP.0020	CES	7	rs73123652,rs73123652,rs73123652,rs73123652,rs73123652,rs73123652,rs73123652	0.00808566	0.000155625	TRUE	1.08848e-14	38.6631	1.44973	0.689783
ISOVF in the right superior longitudinal fasciculus	IDP.2092	AIS	15	rs9739560,rs9739560,rs9739560,rs9739560,rs9739560,rs9739560,rs9739560,rs9739560,rs9739560,rs9739560,rs9739560,rs9739560,rs9739560,rs9739560,rs9739560	0.0277624	0.00017692	TRUE	2.77238e-111	59.6552	1.09927	0.909692
FA in the right anterior thalamic radiation	IDP.1503	SVS	14	rs9608859,rs9608859,rs9608859,rs9608859,rs9608859,rs9608859,rs9608859,rs9608859,rs9608859,rs9608859,rs9608859,rs9608859,rs9608859,rs9608859	0.0184403	0.000417553	TRUE	4.48108e-25	42.0531	1.32726	0.753431
MD in the left superior thalamic radiation	IDP.1817	SVS	9	rs75042717,rs75042717,rs75042717,rs75042717,rs75042717,rs75042717,rs75042717,rs75042717,rs75042717	0.0141149	0.00124154	TRUE	7.00869e-14	49.8593	1.3821	0.723535
Thickness of the left rostral anterior cingulate cortex	IDP.1045	AS	3	rs75721280,rs75721280,rs75721280	0.0030575	4.90034e-05	TRUE	5.16773e-13	32.6724	1.30189	0.768113
OD in the left inferior cerebellar peduncle	IDP.1988	AS	3	rs714392,rs714392,rs714392	0.00390755	4.87382e-05	TRUE	1.59692e-16	40.9915	1.26284	0.791864
ICVF in the right superior corona radiata	IDP.1926	SVS	28	rs9608859,rs9608859,rs9608859,rs9608859,rs9608859,rs9608859,rs9608859,rs9608859,rs9608859,rs9608859,rs9608859,rs9608859,rs9608859,rs9608859,rs9608859,rs9608859,rs9608859,rs9608859,rs9608859,rs9608859,rs9608859,rs9608859,rs9608859,rs9608859,rs9608859,rs9608859,rs9608859,rs9608859	0.0464255	0.00277193	TRUE	1.6079e-49	54.4652	1.19534	0.83658
Cortical surface area of the left banks superior temporal sulcus	IDP.0649	SVS	6	rs73006822,rs73006822,rs73006822,rs73006822,rs73006822,rs73006822	0.00663196	0.000258057	TRUE	4.94104e-09	35.561	1.60336	0.623692
FA in the right posterior thalamic radiation	IDP.1480	SVS	14	rs9388446,rs9388446,rs9388446,rs9388446,rs9388446,rs9388446,rs9388446,rs9388446,rs9388446,rs9388446,rs9388446,rs9388446,rs9388446,rs9388446	0.0192184	0.00125222	TRUE	1.88445e-20	43.8642	1.3196	0.757807
MD in the right anterior thalamic radiation	IDP.1797	SVS	7	rs76088357,rs76088357,rs76088357,rs76088357,rs76088357,rs76088357,rs76088357	0.00792737	0.000190522	TRUE	1.84709e-11	35.7817	1.54003	0.649336
ISOVF in the left anterior thalamic radiation	IDP.2102	AIS	9	rs72714295,rs72714295,rs72714295,rs72714295,rs72714295,rs72714295,rs72714295,rs72714295,rs72714295	0.0124407	0.000130899	TRUE	5.55105e-48	43.8698	1.15188	0.868149
MD in the left acoustic radiation	IDP.1794	AS	5	rs7197215,rs7197215,rs7197215,rs7197215,rs7197215	0.0086698	2.31531e-05	TRUE	1.99045e-39	54.8285	1.16961	0.854987
ISOVF in the left inferior longitudinal fasciculus	IDP.2114	AS	18	rs9898671,rs9898671,rs9898671,rs9898671,rs9898671,rs9898671,rs9898671,rs9898671,rs9898671,rs9898671,rs9898671,rs9898671,rs9898671,rs9898671,rs9898671,rs9898671,rs9898671,rs9898671	0.0336945	0.0001949	TRUE	4.30165e-143	60.697	1.08271	0.923605
Cortical surface area of the right postcentral gyrus	IDP.0703	SVS	6	rs67286026,rs67286026,rs67286026,rs67286026,rs67286026,rs67286026	0.014724	0.000322072	TRUE	1.7048e-20	79.5981	1.37279	0.728445
FA in the left anterior thalamic radiation	IDP.1502	SVS	9	rs9608859,rs9608859,rs9608859,rs9608859,rs9608859,rs9608859,rs9608859,rs9608859,rs9608859	0.013344	0.000401589	TRUE	1.29144e-17	47.1	1.3949	0.716899
ISOVF in the left cerebral peduncle	IDP.2067	CES	2	rs7196814,rs7196814	0.00261727	6.48262e-06	TRUE	1.59963e-06	41.1337	1.92083	0.520609
MD in the left acoustic radiation	IDP.1794	AIS	5	rs7197215,rs7197215,rs7197215,rs7197215,rs7197215	0.0086698	2.20484e-05	TRUE	1.0446e-37	54.8285	1.18456	0.844193
ISOVF in the right superior thalamic radiation	IDP.2124	SVS	11	rs9739560,rs9739560,rs9739560,rs9739560,rs9739560,rs9739560,rs9739560,rs9739560,rs9739560,rs9739560,rs9739560	0.0162211	0.000939025	TRUE	4.3148e-18	46.9771	1.35238	0.739436
ISOVF in the left anterior corona radiata	IDP.2075	SVS	13	rs9739560,rs9739560,rs9739560,rs9739560,rs9739560,rs9739560,rs9739560,rs9739560,rs9739560,rs9739560,rs9739560,rs9739560,rs9739560	0.0210874	0.000799336	TRUE	8.57435e-26	51.9305	1.30311	0.767395
ISOVF in the left superior longitudinal fasciculus	IDP.2093	SVS	19	rs9739560,rs9739560,rs9739560,rs9739560,rs9739560,rs9739560,rs9739560,rs9739560,rs9739560,rs9739560,rs9739560,rs9739560,rs9739560,rs9739560,rs9739560,rs9739560,rs9739560,rs9739560,rs9739560	0.0270461	0.000939322	TRUE	2.08751e-33	45.8422	1.26336	0.791539
OD in the right inferior cerebellar peduncle	IDP.1987	AS	4	rs7838141,rs7838141,rs7838141,rs7838141	0.00424139	1.14509e-05	TRUE	4.63337e-20	33.3814	1.25106	0.799323
MD in the left posterior thalamic radiation	IDP.1631	SVS	22	rs9899380,rs9899380,rs9899380,rs9899380,rs9899380,rs9899380,rs9899380,rs9899380,rs9899380,rs9899380,rs9899380,rs9899380,rs9899380,rs9899380,rs9899380,rs9899380,rs9899380,rs9899380,rs9899380,rs9899380,rs9899380,rs9899380	0.0335904	0.00150627	TRUE	6.8723e-39	49.4998	1.2334	0.810769
ISOVF in the left external capsule	IDP.2085	SVS	7	rs9308343,rs9308343,rs9308343,rs9308343,rs9308343,rs9308343,rs9308343	0.0124613	0.000119032	TRUE	2.11964e-19	56.5036	1.41116	0.708639
ISOVF in the right acoustic radiation	IDP.2101	AS	9	rs80246513,rs80246513,rs80246513,rs80246513,rs80246513,rs80246513,rs80246513,rs80246513,rs80246513	0.0121095	9.65557e-05	TRUE	2.04482e-50	42.6875	1.14175	0.875849
OD in the left inferior cerebellar peduncle	IDP.1988	SVS	3	rs714392,rs714392,rs714392	0.00390755	0.000207361	TRUE	1.78997e-05	40.9915	1.84974	0.540615
MD in the left cingulum cingulate gyrus part	IDP.1637	AS	17	rs9293304,rs9293304,rs9293304,rs9293304,rs9293304,rs9293304,rs9293304,rs9293304,rs9293304,rs9293304,rs9293304,rs9293304,rs9293304,rs9293304,rs9293304,rs9293304,rs9293304	0.0344897	0.000123079	TRUE	1.34328e-151	65.8457	1.08172	0.924457
FA in the left anterior corona radiata	IDP.1475	SVS	9	rs9557081,rs9557081,rs9557081,rs9557081,rs9557081,rs9557081,rs9557081,rs9557081,rs9557081	0.0101327	0.000400051	TRUE	5.59463e-13	35.6494	1.46512	0.682536
FA in the anterior limb of the right internal capsule	IDP.1468	SVS	10	rs807478,rs807478,rs807478,rs807478,rs807478,rs807478,rs807478,rs807478,rs807478,rs807478	0.0113922	0.000570492	TRUE	1.25748e-13	36.1186	1.43362	0.697535
MO in the anterior limb of the right internal capsule	IDP.1543	AIS	11	rs668799,rs668799,rs668799,rs668799,rs668799,rs668799,rs668799,rs668799,rs668799,rs668799,rs668799	0.0139359	0.000185159	TRUE	3.79561e-52	40.2694	1.14292	0.874949
Volume of the right hippocampus	IDP.0020	SVS	6	rs73220476,rs73220476,rs73220476,rs73220476,rs73220476,rs73220476	0.00708695	0.000448271	TRUE	1.45763e-08	39.4969	1.57884	0.633376
ISOVF in the right external capsule	IDP.2084	AIS	8	rs9308343,rs9308343,rs9308343,rs9308343,rs9308343,rs9308343,rs9308343,rs9308343	0.0140227	0.000135278	TRUE	2.00548e-54	55.7227	1.14245	0.87531
FA in the right anterior corona radiata	IDP.1474	AIS	17	rs798562,rs798562,rs798562,rs798562,rs798562,rs798562,rs798562,rs798562,rs798562,rs798562,rs798562,rs798562,rs798562,rs798562,rs798562,rs798562,rs798562	0.0206217	0.000258902	TRUE	3.30184e-77	38.8125	1.11608	0.895995
ISOVF in the right inferior fronto-occipital fasciculus	IDP.2113	AIS	19	rs9739560,rs9739560,rs9739560,rs9739560,rs9739560,rs9739560,rs9739560,rs9739560,rs9739560,rs9739560,rs9739560,rs9739560,rs9739560,rs9739560,rs9739560,rs9739560,rs9739560,rs9739560,rs9739560	0.0340498	0.000251915	TRUE	7.01244e-135	58.1298	1.08922	0.918086
Volume of the left caudate	IDP.0013	SVS	22	rs9349973,rs9349973,rs9349973,rs9349973,rs9349973,rs9349973,rs9349973,rs9349973,rs9349973,rs9349973,rs9349973,rs9349973,rs9349973,rs9349973,rs9349973,rs9349973,rs9349973,rs9349973,rs9349973,rs9349973,rs9349973,rs9349973	0.0264478	0.00145411	TRUE	1.47609e-29	40.9789	1.26669	0.78946
Cortical surface area of the right lateral orbital frontal cortex	IDP.0693	CES	6	rs7222314,rs7222314,rs7222314,rs7222314,rs7222314,rs7222314	0.00819165	0.000308975	TRUE	4.55912e-13	43.9925	1.44625	0.691444
ISOVF in the left inferior longitudinal fasciculus	IDP.2114	AIS	16	rs9898671,rs9898671,rs9898671,rs9898671,rs9898671,rs9898671,rs9898671,rs9898671,rs9898671,rs9898671,rs9898671,rs9898671,rs9898671,rs9898671,rs9898671,rs9898671	0.0312981	0.000140598	TRUE	5.98567e-129	63.2748	1.09324	0.914714
OD in the left cerebral peduncle	IDP.1992	SVS	12	rs712591,rs712591,rs712591,rs712591,rs712591,rs712591,rs712591,rs712591,rs712591,rs712591,rs712591,rs712591	0.0165297	0.00102953	TRUE	5.11407e-18	43.8953	1.34856	0.741533
ISOVF in the right cerebral peduncle	IDP.2066	AIS	3	rs6442409,rs6442409,rs6442409	0.00363879	6.01167e-05	TRUE	2.56647e-14	38.1626	1.2988	0.769943
FA in the right cingulum hippocampus	IDP.1488	AS	9	rs929294,rs929294,rs929294,rs929294,rs929294,rs929294,rs929294,rs929294,rs929294	0.0106579	5.04014e-05	TRUE	1.74923e-46	37.5181	1.15177	0.868228
MD in the retrolenticular part of the right internal capsule	IDP.1622	SVS	13	rs76238604,rs76238604,rs76238604,rs76238604,rs76238604,rs76238604,rs76238604,rs76238604,rs76238604,rs76238604,rs76238604,rs76238604,rs76238604	0.0207916	0.000537075	TRUE	1.75115e-27	51.1872	1.30556	0.765954
MD in the right superior thalamic radiation	IDP.1818	SVS	10	rs8067689,rs8067689,rs8067689,rs8067689,rs8067689,rs8067689,rs8067689,rs8067689,rs8067689,rs8067689	0.0152666	0.000684444	TRUE	2.6516e-18	48.591	1.365	0.732599
Volume of the right caudate	IDP.0014	SVS	24	rs947934,rs947934,rs947934,rs947934,rs947934,rs947934,rs947934,rs947934,rs947934,rs947934,rs947934,rs947934,rs947934,rs947934,rs947934,rs947934,rs947934,rs947934,rs947934,rs947934,rs947934,rs947934,rs947934,rs947934	0.0276453	0.00207997	TRUE	6.36162e-28	39.3107	1.26015	0.793557
ISOVF in the right cerebral peduncle	IDP.2066	CES	3	rs6442409,rs6442409,rs6442409	0.00363879	8.44004e-06	TRUE	1.43295e-08	38.1626	1.73951	0.574873
FA in the right inferior cerebellar peduncle	IDP.1462	SVS	8	rs7838141,rs7838141,rs7838141,rs7838141,rs7838141,rs7838141,rs7838141,rs7838141	0.0106952	0.000312892	TRUE	1.80438e-14	42.3589	1.45028	0.689524
ISOVF in the right inferior longitudinal fasciculus	IDP.2115	AS	25	rs9471179,rs9471179,rs9471179,rs9471179,rs9471179,rs9471179,rs9471179,rs9471179,rs9471179,rs9471179,rs9471179,rs9471179,rs9471179,rs9471179,rs9471179,rs9471179,rs9471179,rs9471179,rs9471179,rs9471179,rs9471179,rs9471179,rs9471179,rs9471179,rs9471179	0.0445486	0.000231048	TRUE	1.15221e-191	58.4239	1.07156	0.933221
Cortical surface area of the right inferior parietal cortex	IDP.0689	CES	10	rs9856782,rs9856782,rs9856782,rs9856782,rs9856782,rs9856782,rs9856782,rs9856782,rs9856782,rs9856782	0.0123776	0.000921365	TRUE	8.51096e-16	40.0477	1.35008	0.740695
ISOVF in the left inferior fronto-occipital fasciculus	IDP.2112	AS	13	rs72714295,rs72714295,rs72714295,rs72714295,rs72714295,rs72714295,rs72714295,rs72714295,rs72714295,rs72714295,rs72714295,rs72714295,rs72714295	0.0253319	0.000114618	TRUE	2.05177e-109	62.6515	1.09599	0.912421
MD in the right cingulum cingulate gyrus part	IDP.1636	AS	20	rs9293304,rs9293304,rs9293304,rs9293304,rs9293304,rs9293304,rs9293304,rs9293304,rs9293304,rs9293304,rs9293304,rs9293304,rs9293304,rs9293304,rs9293304,rs9293304,rs9293304,rs9293304,rs9293304,rs9293304	0.0378111	0.000203079	TRUE	9.26385e-162	61.566	1.0779	0.927727
MO in the right sagittal stratum	IDP.1557	AIS	4	rs13143980,rs13143980,rs13143980,rs13143980	0.00527699	8.62726e-06	TRUE	5.16227e-24	41.5771	1.24246	0.804854
MD in the forceps minor	IDP.1805	AIS	22	rs9635723,rs9635723,rs9635723,rs9635723,rs9635723,rs9635723,rs9635723,rs9635723,rs9635723,rs9635723,rs9635723,rs9635723,rs9635723,rs9635723,rs9635723,rs9635723,rs9635723,rs9635723,rs9635723,rs9635723,rs9635723,rs9635723	0.0390706	0.000265518	TRUE	3.10308e-156	57.9031	1.08305	0.923316
FA in the left cerebral peduncle	IDP.1467	SVS	8	rs7865618,rs7865618,rs7865618,rs7865618,rs7865618,rs7865618,rs7865618,rs7865618	0.011645	0.000696631	TRUE	3.02751e-13	46.1639	1.428	0.70028
MD in the body of corpus callosum	IDP.1605	AS	14	rs796001,rs796001,rs796001,rs796001,rs796001,rs796001,rs796001,rs796001,rs796001,rs796001,rs796001,rs796001,rs796001,rs796001	0.0192521	0.000113385	TRUE	1.26376e-81	43.9406	1.11086	0.900203
ISOVF in the right anterior corona radiata	IDP.2074	SVS	14	rs9739560,rs9739560,rs9739560,rs9739560,rs9739560,rs9739560,rs9739560,rs9739560,rs9739560,rs9739560,rs9739560,rs9739560,rs9739560,rs9739560	0.0227679	0.000709482	TRUE	6.18955e-29	52.1512	1.2902	0.775074
MD in the right inferior fronto-occipital fasciculus	IDP.1807	AIS	21	rs9915591,rs9915591,rs9915591,rs9915591,rs9915591,rs9915591,rs9915591,rs9915591,rs9915591,rs9915591,rs9915591,rs9915591,rs9915591,rs9915591,rs9915591,rs9915591,rs9915591,rs9915591,rs9915591,rs9915591,rs9915591	0.0359234	0.000258341	TRUE	9.26554e-143	55.5911	1.08677	0.92016
Cortical surface area of the right middle temporal gyrus	IDP.0696	CES	4	rs7388625,rs7388625,rs7388625,rs7388625	0.00386206	0.000119685	TRUE	3.92471e-07	30.978	1.71149	0.584285
Cortical surface area of the left superior parietal gyrus	IDP.0676	SVS	13	rs888812,rs888812,rs888812,rs888812,rs888812,rs888812,rs888812,rs888812,rs888812,rs888812,rs888812,rs888812,rs888812	0.0203632	0.000596075	TRUE	1.90968e-26	51.0894	1.30921	0.763821
Cortical surface area of the left precentral gyrus	IDP.0671	AS	6	rs72704117,rs72704117,rs72704117,rs72704117,rs72704117,rs72704117	0.0220175	1.59743e-05	TRUE	1.11488e-104	119.912	1.10331	0.906366
ISOVF in the left anterior corona radiata	IDP.2075	AIS	11	rs9739560,rs9739560,rs9739560,rs9739560,rs9739560,rs9739560,rs9739560,rs9739560,rs9739560,rs9739560,rs9739560	0.0188047	0.000179016	TRUE	1.03115e-72	54.6052	1.12188	0.891363
FA in the right medial lemniscus	IDP.1460	SVS	6	rs74050914,rs74050914,rs74050914,rs74050914,rs74050914,rs74050914	0.00791807	0.000414758	TRUE	8.86355e-10	41.6976	1.54043	0.649168
ISOVF in the body of corpus callosum	IDP.2055	AS	13	rs6772621,rs6772621,rs6772621,rs6772621,rs6772621,rs6772621,rs6772621,rs6772621,rs6772621,rs6772621,rs6772621,rs6772621,rs6772621	0.0148665	8.97756e-05	TRUE	3.96576e-63	36.3791	1.12709	0.887239
Volume of the left fusiform gyrus	IDP.0349	AIS	1	rs150592114	0.00173412	7.31847e-06	TRUE	1.38613e-08	55.527	1.46039	0.684748
Volume of the left fusiform gyrus	IDP.0349	CES	1	rs150592114	0.00173412	1.22608e-06	TRUE	6.02793e-05	55.527	2.22982	0.448466
Volume of the left fusiform gyrus	IDP.0349	AS	1	rs150592114	0.00173412	2.63106e-05	TRUE	4.85208e-08	55.527	1.41949	0.704478
ISOVF in the right superior fronto-occipital fasciculus	IDP.2094	AS	1	rs2863994	0.00114811	6.76418e-05	TRUE	0.000140044	36.0348	1.53806	0.650169
ISOVF in the right superior fronto-occipital fasciculus	IDP.2094	AIS	1	rs2863994	0.00114811	0.000119463	TRUE	0.000888111	36.0348	1.59271	0.627862
ISOVF in the right superior fronto-occipital fasciculus	IDP.2094	SVS	1	rs2863994	0.00114811	0.000987996	TRUE	0.827086	36.0348	3.11014	0.321529
ISOVF in the posterior limb of the right internal capsule	IDP.2070	AS	1	rs13335305	0.00095712	2.01145e-05	TRUE	8.66233e-05	30.0351	1.60243	0.624052
ISOVF in the posterior limb of the right internal capsule	IDP.2070	AIS	1	rs13335305	0.00095712	2.25345e-05	TRUE	0.000149589	30.0351	1.66489	0.60064
ISOVF in the posterior limb of the right internal capsule	IDP.2070	SVS	1	rs13335305	0.00095712	1.53684e-07	TRUE	0.00653224	30.0351	3.46503	0.288598
ISOVF in the left superior fronto-occipital fasciculus	IDP.2095	AS	1	rs12192990	0.00120654	7.37904e-05	TRUE	0.00010433	37.8716	1.52191	0.65707
ISOVF in the left superior fronto-occipital fasciculus	IDP.2095	AIS	1	rs12192990	0.00120654	5.86454e-05	TRUE	8.82968e-05	37.8716	1.57463	0.635069
MO in the right superior cerebellar peduncle	IDP.1539	SVS	1	rs77515140	0.00116302	7.48466e-05	TRUE	0.0234098	36.5061	3.08745	0.323892

## Sheet: Table S8
Table S8: The information of IVs for all exposure-outcome pairs in reverse MR
Exposure (Stroke)	Outcome (IDP)	IDP ID	IVs N	IVs	Exposure variance explained	Outcome variance explained	Correct causal direction	steiger P	F-statistic	β at 80% power (5% error rate )
AIS	ISOVF in the body of corpus callosum	IDP.2055	8	rs4942561,rs4942561,rs4942561,rs4942561,rs4942561,rs4942561,rs4942561,rs4942561	0.00486386	0.00100857	TRUE	3.54939e-08	38.5545	0.226832	-0.226832
AS	ISOVF in the body of corpus callosum	IDP.2055	8	rs4942561,rs4942561,rs4942561,rs4942561,rs4942561,rs4942561,rs4942561,rs4942561	0.00447598	0.000919607	TRUE	5.35065e-08	41.4477	0.236546	-0.236546
CES	ISOVF in the left corticospinal tract	IDP.2059	4	rs6838973,rs6838973,rs6838973,rs6838973	0.0207868	0.000491428	TRUE	7.21918e-34	74.5504	0.109922	-0.109922
AIS	MD in the right superior longitudinal fasciculus	IDP.1642	7	rs4942561,rs4942561,rs4942561,rs4942561,rs4942561,rs4942561,rs4942561	0.00435893	0.000489948	TRUE	1.95339e-10	39.4582	0.239638	-0.239638
AIS	ISOVF in the right superior corona radiata	IDP.2076	6	rs4942561,rs4942561,rs4942561,rs4942561,rs4942561,rs4942561	0.00319082	0.000516116	TRUE	9.81509e-07	33.7614	0.27967	-0.27967
AIS	MD in the left inferior longitudinal fasciculus	IDP.1808	7	rs4942561,rs4942561,rs4942561,rs4942561,rs4942561,rs4942561,rs4942561	0.00435893	0.000459914	TRUE	1.01516e-10	39.4582	0.239642	-0.239642
AS	FA in the right superior corona radiata	IDP.1476	8	rs4942561,rs4942561,rs4942561,rs4942561,rs4942561,rs4942561,rs4942561,rs4942561	0.00447598	0.000482009	TRUE	2.36039e-11	41.4477	0.236543	-0.236543
AIS	MD in the retrolenticular part of the left internal capsule	IDP.1623	7	rs4942561,rs4942561,rs4942561,rs4942561,rs4942561,rs4942561,rs4942561	0.0038986	0.000450552	TRUE	2.29019e-09	35.3562	0.2531	-0.2531
AIS	MD in the right posterior thalamic radiation	IDP.1630	8	rs4942561,rs4942561,rs4942561,rs4942561,rs4942561,rs4942561,rs4942561,rs4942561	0.00486386	0.000477338	TRUE	3.72549e-12	38.5545	0.226828	-0.226828
AIS	ISOVF in the left superior corona radiata	IDP.2077	8	rs4942561,rs4942561,rs4942561,rs4942561,rs4942561,rs4942561,rs4942561,rs4942561	0.00486386	0.000640354	TRUE	1.14431e-10	38.5545	0.226832	-0.226832
AS	MO in the right inferior cerebellar peduncle	IDP.1537	7	rs4942561,rs4942561,rs4942561,rs4942561,rs4942561,rs4942561,rs4942561	0.00403672	0.000403888	TRUE	1.07642e-10	42.6855	0.249128	-0.249128
AS	ISOVF in the right superior corona radiata	IDP.2076	7	rs4942561,rs4942561,rs4942561,rs4942561,rs4942561,rs4942561,rs4942561	0.00371472	0.000619275	TRUE	8.32556e-08	39.2746	0.259683	-0.259683
AS	MD in the body of corpus callosum	IDP.1605	6	rs4942561,rs4942561,rs4942561,rs4942561,rs4942561,rs4942561	0.00337273	0.000292235	TRUE	1.14069e-09	41.5072	0.272792	-0.272792
AIS	MD in the body of corpus callosum	IDP.1605	7	rs4942561,rs4942561,rs4942561,rs4942561,rs4942561,rs4942561,rs4942561	0.00431266	0.000301345	TRUE	2.46469e-12	39.0766	0.2408	-0.2408
AS	MD in the right posterior thalamic radiation	IDP.1630	7	rs4942561,rs4942561,rs4942561,rs4942561,rs4942561,rs4942561,rs4942561	0.00403672	0.000340813	TRUE	2.10486e-11	42.6855	0.249128	-0.249128
AIS	MD in the left anterior thalamic radiation	IDP.1796	7	rs4942561,rs4942561,rs4942561,rs4942561,rs4942561,rs4942561,rs4942561	0.00435893	0.000363057	TRUE	9.69696e-12	39.4582	0.239642	-0.239642
CES	MD in the left anterior thalamic radiation	IDP.1796	4	rs6838973,rs6838973,rs6838973,rs6838973	0.0207868	0.00023007	TRUE	1.23875e-37	74.5504	0.109922	-0.109922
AIS	MD in the left superior longitudinal fasciculus	IDP.1643	8	rs4942561,rs4942561,rs4942561,rs4942561,rs4942561,rs4942561,rs4942561,rs4942561	0.00486386	0.000385723	TRUE	3.67706e-13	38.5545	0.226828	-0.226828
AIS	MD in the right sagittal stratum	IDP.1632	8	rs4942561,rs4942561,rs4942561,rs4942561,rs4942561,rs4942561,rs4942561,rs4942561	0.00486386	0.000359705	TRUE	1.77789e-13	38.5545	0.226828	-0.226828
AS	MD in the left inferior fronto-occipital fasciculus	IDP.1806	7	rs4942561,rs4942561,rs4942561,rs4942561,rs4942561,rs4942561,rs4942561	0.00403672	0.000422362	TRUE	1.67746e-10	42.6855	0.249132	-0.249132
AIS	ISOVF in the right posterior corona radiata	IDP.2078	4	rs34311906,rs34311906,rs34311906,rs34311906	0.00225907	0.000267453	TRUE	6.27811e-06	35.716	0.332868	-0.332868
CES	ISOVF in the posterior limb of the left internal capsule	IDP.2071	4	rs6838973,rs6838973,rs6838973,rs6838973	0.0207868	0.000300723	TRUE	1.92299e-36	74.5504	0.109922	-0.109922
AIS	MD in the left superior thalamic radiation	IDP.1817	8	rs4942561,rs4942561,rs4942561,rs4942561,rs4942561,rs4942561,rs4942561,rs4942561	0.00486386	0.000497195	TRUE	5.90095e-12	38.5545	0.226832	-0.226832
CES	MD in the right anterior corona radiata	IDP.1624	4	rs6838973,rs6838973,rs6838973,rs6838973	0.0207868	0.000200965	TRUE	3.48748e-38	74.5504	0.10992	-0.10992
AS	ISOVF in the posterior limb of the left internal capsule	IDP.2071	8	rs4942561,rs4942561,rs4942561,rs4942561,rs4942561,rs4942561,rs4942561,rs4942561	0.00447598	0.000550182	TRUE	1.05458e-10	41.4477	0.236546	-0.236546
AS	MD in the anterior limb of the left internal capsule	IDP.1619	7	rs4942561,rs4942561,rs4942561,rs4942561,rs4942561,rs4942561,rs4942561	0.00371472	0.000306609	TRUE	1.08599e-10	39.2746	0.259679	-0.259679
AIS	MD in the left inferior fronto-occipital fasciculus	IDP.1806	8	rs4942561,rs4942561,rs4942561,rs4942561,rs4942561,rs4942561,rs4942561,rs4942561	0.00486386	0.000397207	TRUE	5.01657e-13	38.5545	0.226832	-0.226832
CES	ISOVF in the body of corpus callosum	IDP.2055	4	rs6838973,rs6838973,rs6838973,rs6838973	0.0207868	0.000344157	TRUE	8.68103e-36	74.5504	0.109922	-0.109922
AIS	MO in the right inferior cerebellar peduncle	IDP.1537	8	rs4942561,rs4942561,rs4942561,rs4942561,rs4942561,rs4942561,rs4942561,rs4942561	0.00486386	0.000448464	TRUE	1.86274e-12	38.5545	0.226828	-0.226828
AS	MD in the anterior limb of the right internal capsule	IDP.1618	8	rs4942561,rs4942561,rs4942561,rs4942561,rs4942561,rs4942561,rs4942561,rs4942561	0.00447598	0.000454031	TRUE	1.22048e-11	41.4477	0.236543	-0.236543
AIS	MD in the right inferior longitudinal fasciculus	IDP.1809	8	rs4942561,rs4942561,rs4942561,rs4942561,rs4942561,rs4942561,rs4942561,rs4942561	0.00486386	0.000413425	TRUE	7.69221e-13	38.5545	0.226832	-0.226832
AS	ISOVF in the left superior corona radiata	IDP.2077	8	rs4942561,rs4942561,rs4942561,rs4942561,rs4942561,rs4942561,rs4942561,rs4942561	0.00447598	0.000578782	TRUE	1.89553e-10	41.4477	0.236546	-0.236546
AIS	ISOVF in the left cingulum cingulate gyrus part	IDP.2087	5	rs4942561,rs4942561,rs4942561,rs4942561,rs4942561	0.00304255	0.000168984	TRUE	9.99447e-10	38.4709	0.286977	-0.286977
AIS	OD in the right posterior corona radiata	IDP.2003	5	rs34311906,rs34311906,rs34311906,rs34311906,rs34311906	0.0028909	0.000385382	TRUE	7.52172e-07	36.6525	0.293989	-0.293989
AIS	MD in the right superior thalamic radiation	IDP.1818	8	rs4942561,rs4942561,rs4942561,rs4942561,rs4942561,rs4942561,rs4942561,rs4942561	0.00486386	0.000588453	TRUE	4.16223e-11	38.5545	0.226832	-0.226832
AIS	MD in the left posterior thalamic radiation	IDP.1631	6	rs4942561,rs4942561,rs4942561,rs4942561,rs4942561,rs4942561	0.00380773	0.000249707	TRUE	2.83906e-11	40.2236	0.256295	-0.256295
AIS	MD in the forceps minor	IDP.1805	7	rs4942561,rs4942561,rs4942561,rs4942561,rs4942561,rs4942561,rs4942561	0.00435893	0.000291156	TRUE	1.25541e-12	39.4582	0.239642	-0.239642
AIS	MD in the right external capsule	IDP.1634	5	rs4942561,rs4942561,rs4942561,rs4942561,rs4942561	0.0031759	0.000250051	TRUE	4.20584e-09	40.1741	0.280843	-0.280843
AS	Volume of the right caudate	IDP.0014	7	rs4942561,rs4942561,rs4942561,rs4942561,rs4942561,rs4942561,rs4942561	0.00403672	0.000468477	TRUE	2.12627e-10	42.6855	0.242071	-0.242071
AS	FA in the right cingulum hippocampus	IDP.1488	5	rs475937,rs475937,rs475937,rs475937,rs475937	0.00304063	0.000220496	TRUE	2.16301e-09	45.0102	0.28692	-0.28692
AIS	MD in the anterior limb of the right internal capsule	IDP.1618	8	rs4942561,rs4942561,rs4942561,rs4942561,rs4942561,rs4942561,rs4942561,rs4942561	0.00486386	0.000468975	TRUE	3.05743e-12	38.5545	0.226828	-0.226828
AIS	MD in the right superior corona radiata	IDP.1626	8	rs4942561,rs4942561,rs4942561,rs4942561,rs4942561,rs4942561,rs4942561,rs4942561	0.00486386	0.00040788	TRUE	6.65139e-13	38.5545	0.226828	-0.226828
AS	MO in the right cingulum cingulate gyrus part	IDP.1561	4	rs475937,rs475937,rs475937,rs475937	0.00228113	0.000195739	TRUE	5.31206e-07	42.149	0.331371	-0.331371
AS	Thickness of the left fusiform gyrus	IDP.1026	7	rs475937,rs475937,rs475937,rs475937,rs475937,rs475937,rs475937	0.00398923	0.000211601	TRUE	3.52632e-13	42.2181	0.248088	-0.248088
CES	MD in the body of corpus callosum	IDP.1605	4	rs6838973,rs6838973,rs6838973,rs6838973	0.0207868	0.000135688	TRUE	1.32417e-39	74.5504	0.10992	-0.10992
AIS	Volume of the white matter hyperintensities	IDP.0179	6	rs473238,rs473238,rs473238,rs473238,rs473238,rs473238	0.00387938	0.000216275	TRUE	3.87107e-12	40.9431	0.251599	-0.251599
AS	MD in the retrolenticular part of the left internal capsule	IDP.1623	7	rs4942561,rs4942561,rs4942561,rs4942561,rs4942561,rs4942561,rs4942561	0.00403672	0.000401815	TRUE	1.02326e-10	42.6855	0.249128	-0.249128
AIS	MD in the anterior limb of the left internal capsule	IDP.1619	7	rs4942561,rs4942561,rs4942561,rs4942561,rs4942561,rs4942561,rs4942561	0.0038986	0.000290513	TRUE	4.66716e-11	35.3562	0.2531	-0.2531
AIS	MD in the left acoustic radiation	IDP.1794	8	rs4942561,rs4942561,rs4942561,rs4942561,rs4942561,rs4942561,rs4942561,rs4942561	0.00486386	0.00022811	TRUE	2.3072e-15	38.5545	0.226832	-0.226832
AS	MD in the right superior fronto-occipital fasciculus	IDP.1644	7	rs4942561,rs4942561,rs4942561,rs4942561,rs4942561,rs4942561,rs4942561	0.00403672	0.000228417	TRUE	6.23332e-13	42.6855	0.249128	-0.249128
CES	MD in the right anterior thalamic radiation	IDP.1797	4	rs6838973,rs6838973,rs6838973,rs6838973	0.0207868	0.000153528	TRUE	3.48475e-39	74.5504	0.109922	-0.109922
AIS	MD in the right superior fronto-occipital fasciculus	IDP.1644	8	rs4942561,rs4942561,rs4942561,rs4942561,rs4942561,rs4942561,rs4942561,rs4942561	0.00486386	0.000294632	TRUE	2.43551e-14	38.5545	0.226828	-0.226828
AS	Volume of the white matter hyperintensities	IDP.0179	7	rs475937,rs475937,rs475937,rs475937,rs475937,rs475937,rs475937	0.00398923	0.000433218	TRUE	2.35332e-10	42.2181	0.248088	-0.248088
CES	OD in the left inferior fronto-occipital fasciculus	IDP.2037	4	rs6838973,rs6838973,rs6838973,rs6838973	0.0207868	0.000127964	TRUE	8.54362e-40	74.5504	0.109924	-0.109924
CES	Cortical surface area of the left pars orbitalis	IDP.0666	4	rs6838973,rs6838973,rs6838973,rs6838973	0.0207868	0.000144353	TRUE	1.27275e-39	74.5504	0.108865	-0.108865
AS	ISOVF in the left posterior corona radiata	IDP.2079	5	rs2634074,rs2634074,rs2634074,rs2634074,rs2634074	0.00296759	0.000387654	TRUE	2.36957e-07	44.0503	0.290024	-0.290024
AIS	Cortical surface area of the left precentral gyrus	IDP.0671	8	rs4942561,rs4942561,rs4942561,rs4942561,rs4942561,rs4942561,rs4942561,rs4942561	0.00486386	0.000271217	TRUE	7.48959e-15	38.5545	0.224647	-0.224647
AIS	Volume of the right caudate	IDP.0014	8	rs4942561,rs4942561,rs4942561,rs4942561,rs4942561,rs4942561,rs4942561,rs4942561	0.00486386	0.000275303	TRUE	3.96197e-15	38.5545	0.220403	-0.220403
AS	MD in the right superior corona radiata	IDP.1626	7	rs4942561,rs4942561,rs4942561,rs4942561,rs4942561,rs4942561,rs4942561	0.00403672	0.000276899	TRUE	3.19795e-12	42.6855	0.249128	-0.249128
AIS	ISOVF in the forceps major	IDP.2110	5	rs4942561,rs4942561,rs4942561,rs4942561,rs4942561	0.00287527	0.000209864	TRUE	1.42011e-08	36.4309	0.294884	-0.294884
AS	Volume of the left fusiform gyrus	IDP.0349	7	rs475937,rs475937,rs475937,rs475937,rs475937,rs475937,rs475937	0.00398923	0.000290774	TRUE	5.26237e-12	42.2181	0.248088	-0.248088
AIS	MD in the posterior limb of the right internal capsule	IDP.1620	7	rs4942561,rs4942561,rs4942561,rs4942561,rs4942561,rs4942561,rs4942561	0.0038986	0.000182514	TRUE	1.31372e-12	35.3562	0.2531	-0.2531
AS	MD in the left anterior thalamic radiation	IDP.1796	7	rs4942561,rs4942561,rs4942561,rs4942561,rs4942561,rs4942561,rs4942561	0.00403672	0.000495282	TRUE	8.4896e-10	42.6855	0.249132	-0.249132
AIS	MD in the left superior fronto-occipital fasciculus	IDP.1645	8	rs4942561,rs4942561,rs4942561,rs4942561,rs4942561,rs4942561,rs4942561,rs4942561	0.00486386	0.000258082	TRUE	6.9998e-15	38.5545	0.226828	-0.226828
AIS	MO in the right cingulum cingulate gyrus part	IDP.1561	8	rs4942561,rs4942561,rs4942561,rs4942561,rs4942561,rs4942561,rs4942561,rs4942561	0.00486386	0.000215171	TRUE	1.38713e-15	38.5545	0.226828	-0.226828
AS	OD in the right posterior corona radiata	IDP.2003	3	rs2107595,rs2107595,rs2107595	0.00176707	0.00032464	TRUE	0.000362156	43.7063	0.375669	-0.375669
AIS	FA in the right tapetum	IDP.1498	5	rs473238,rs473238,rs473238,rs473238,rs473238	0.00317806	0.000180599	TRUE	4.89737e-10	40.1889	0.280791	-0.280791
AS	MD in the right sagittal stratum	IDP.1632	7	rs4942561,rs4942561,rs4942561,rs4942561,rs4942561,rs4942561,rs4942561	0.00403672	0.000244041	TRUE	1.08041e-12	42.6855	0.249128	-0.249128
AIS	MD in the right posterior corona radiata	IDP.1628	6	rs4942561,rs4942561,rs4942561,rs4942561,rs4942561,rs4942561	0.00380773	0.000115511	TRUE	1.50936e-13	40.2236	0.256295	-0.256295
AIS	OD in the left posterior corona radiata	IDP.2004	5	rs34311906,rs34311906,rs34311906,rs34311906,rs34311906	0.0028909	0.000187034	TRUE	6.26734e-09	36.6525	0.293989	-0.293989
AS	MD in the right acoustic radiation	IDP.1795	6	rs475937,rs475937,rs475937,rs475937,rs475937,rs475937	0.00332524	0.0002688	TRUE	8.72963e-10	40.9627	0.274597	-0.274597
AS	ISOVF in the left acoustic radiation	IDP.2100	4	rs4942561,rs4942561,rs4942561,rs4942561	0.00235109	0.000123492	TRUE	2.86299e-08	43.465	0.326338	-0.326338
AS	MD in the genu of corpus callosum	IDP.1604	6	rs475937,rs475937,rs475937,rs475937,rs475937,rs475937	0.00354996	0.000242624	TRUE	6.23884e-11	43.7957	0.265593	-0.265593
AS	FA in the left superior thalamic radiation	IDP.1523	6	rs4942561,rs4942561,rs4942561,rs4942561,rs4942561,rs4942561	0.00320715	0.000196974	TRUE	2.49163e-10	39.5388	0.279482	-0.279482
AIS	ISOVF in the right cingulum cingulate gyrus part	IDP.2086	4	rs34311906,rs34311906,rs34311906,rs34311906	0.00251655	0.000118027	TRUE	1.24233e-08	39.6862	0.315818	-0.315818
AIS	MD in the left external capsule	IDP.1635	5	rs4942561,rs4942561,rs4942561,rs4942561,rs4942561	0.0031759	0.000136317	TRUE	9.49369e-11	40.1741	0.280843	-0.280843
AS	ISOVF in the right inferior longitudinal fasciculus	IDP.2115	4	rs2634074,rs2634074,rs2634074,rs2634074	0.00246935	0.00017314	TRUE	5.78788e-08	45.7008	0.318275	-0.318275
CES	ICVF in the right posterior corona radiata	IDP.1928	4	rs6838973,rs6838973,rs6838973,rs6838973	0.0207868	0.000111006	TRUE	3.08032e-40	74.5504	0.109922	-0.109922
AS	ISOVF in the left anterior thalamic radiation	IDP.2102	7	rs4942561,rs4942561,rs4942561,rs4942561,rs4942561,rs4942561,rs4942561	0.00396665	0.000182566	TRUE	1.97794e-13	41.97	0.251242	-0.251242
AS	ISOVF in the left cingulum cingulate gyrus part	IDP.2087	2	rs4942561,rs4942561	0.00124801	7.59061e-05	TRUE	7.81323e-05	46.0384	0.448179	-0.448179
AIS	ISOVF in the left external capsule	IDP.2085	6	rs4942561,rs4942561,rs4942561,rs4942561,rs4942561,rs4942561	0.0037271	0.000122274	TRUE	4.29458e-13	39.2821	0.259341	-0.259341
AS	ISOVF in the retrolenticular part of the right internal capsule	IDP.2072	8	rs4942561,rs4942561,rs4942561,rs4942561,rs4942561,rs4942561,rs4942561,rs4942561	0.00447598	0.000292147	TRUE	1.32883e-13	41.4477	0.236546	-0.236546
AS	Cortical surface area of the left precentral gyrus	IDP.0671	8	rs4942561,rs4942561,rs4942561,rs4942561,rs4942561,rs4942561,rs4942561,rs4942561	0.00447598	0.000280148	TRUE	6.06947e-14	41.4477	0.234267	-0.234267
AS	FA in the posterior limb of the right internal capsule	IDP.1470	8	rs4942561,rs4942561,rs4942561,rs4942561,rs4942561,rs4942561,rs4942561,rs4942561	0.00447598	0.000253508	TRUE	3.53642e-14	41.4477	0.236543	-0.236543
AS	MD in the left inferior longitudinal fasciculus	IDP.1808	6	rs4942561,rs4942561,rs4942561,rs4942561,rs4942561,rs4942561	0.00352738	0.000266397	TRUE	1.56407e-10	43.5065	0.266476	-0.266476
AS	MD in the right anterior corona radiata	IDP.1624	6	rs4942561,rs4942561,rs4942561,rs4942561,rs4942561,rs4942561	0.00337273	0.000172977	TRUE	2.50001e-11	41.5072	0.272792	-0.272792
AS	Cortical surface area of the right lateral orbital frontal cortex	IDP.0693	8	rs4942561,rs4942561,rs4942561,rs4942561,rs4942561,rs4942561,rs4942561,rs4942561	0.00447598	0.000197524	TRUE	2.62816e-15	41.4477	0.234267	-0.234267
AIS	MD in the right inferior fronto-occipital fasciculus	IDP.1807	6	rs4942561,rs4942561,rs4942561,rs4942561,rs4942561,rs4942561	0.00380773	0.000243777	TRUE	2.35797e-11	40.2236	0.256299	-0.256299
AIS	MD in the left sagittal stratum	IDP.1633	7	rs4942561,rs4942561,rs4942561,rs4942561,rs4942561,rs4942561,rs4942561	0.00431266	0.000154281	TRUE	1.16195e-14	39.0766	0.2408	-0.2408
CES	MD in the right posterior corona radiata	IDP.1628	4	rs6838973,rs6838973,rs6838973,rs6838973	0.0207868	8.08231e-05	TRUE	3.97273e-41	74.5504	0.10992	-0.10992
AIS	OD in the left cingulum hippocampus	IDP.2014	6	rs473238,rs473238,rs473238,rs473238,rs473238,rs473238	0.00339583	0.000189619	TRUE	1.11774e-10	35.8999	0.271239	-0.271239
AS	MD in the left superior fronto-occipital fasciculus	IDP.1645	7	rs4942561,rs4942561,rs4942561,rs4942561,rs4942561,rs4942561,rs4942561	0.00403672	0.000190352	TRUE	1.46137e-13	42.6855	0.249128	-0.249128
AS	MD in the left superior longitudinal fasciculus	IDP.1643	7	rs4942561,rs4942561,rs4942561,rs4942561,rs4942561,rs4942561,rs4942561	0.00403672	0.000271276	TRUE	2.67279e-12	42.6855	0.249128	-0.249128
AS	MO in the anterior limb of the right internal capsule	IDP.1543	8	rs4942561,rs4942561,rs4942561,rs4942561,rs4942561,rs4942561,rs4942561,rs4942561	0.00447598	0.000121781	TRUE	1.0239e-16	41.4477	0.236543	-0.236543
AIS	MD in the right tapetum	IDP.1648	5	rs473238,rs473238,rs473238,rs473238,rs473238	0.00291413	0.000381658	TRUE	5.96059e-07	36.9667	0.292736	-0.292736
AIS	ISOVF in the posterior limb of the right internal capsule	IDP.2070	8	rs4942561,rs4942561,rs4942561,rs4942561,rs4942561,rs4942561,rs4942561,rs4942561	0.00486386	0.000416612	TRUE	8.35478e-13	38.5545	0.226832	-0.226832
AIS	Thickness of the left lateral occipital cortex	IDP.1030	8	rs4942561,rs4942561,rs4942561,rs4942561,rs4942561,rs4942561,rs4942561,rs4942561	0.00486386	0.000175635	TRUE	1.65908e-16	38.5545	0.224647	-0.224647
AIS	OD in the left sagittal stratum	IDP.2008	7	rs473238,rs473238,rs473238,rs473238,rs473238,rs473238,rs473238	0.00436109	0.000197053	TRUE	4.71748e-14	39.4688	0.23961	-0.23961
AIS	MD in the right anterior corona radiata	IDP.1624	7	rs4942561,rs4942561,rs4942561,rs4942561,rs4942561,rs4942561,rs4942561	0.00431266	0.000178544	TRUE	3.35239e-14	39.0766	0.2408	-0.2408
AS	MD in the left sagittal stratum	IDP.1633	6	rs4942561,rs4942561,rs4942561,rs4942561,rs4942561,rs4942561	0.00337273	0.000120314	TRUE	2.60988e-12	41.5072	0.272792	-0.272792
AIS	ISOVF in the retrolenticular part of the left internal capsule	IDP.2073	6	rs4942561,rs4942561,rs4942561,rs4942561,rs4942561,rs4942561	0.00375033	0.000305489	TRUE	2.23661e-10	39.5444	0.258483	-0.258483
AS	MD in the right posterior corona radiata	IDP.1628	6	rs4942561,rs4942561,rs4942561,rs4942561,rs4942561,rs4942561	0.00337273	0.000237702	TRUE	2.33921e-10	41.5072	0.272792	-0.272792
AIS	ISOVF in the left superior fronto-occipital fasciculus	IDP.2095	8	rs4942561,rs4942561,rs4942561,rs4942561,rs4942561,rs4942561,rs4942561,rs4942561	0.00486386	0.000245375	TRUE	4.42109e-15	38.5545	0.226832	-0.226832
AS	FA in the left superior corona radiata	IDP.1477	6	rs475937,rs475937,rs475937,rs475937,rs475937,rs475937	0.00354996	0.000141344	TRUE	1.39039e-12	43.7957	0.265593	-0.265593
AIS	ISOVF in the anterior limb of the left internal capsule	IDP.2069	8	rs4942561,rs4942561,rs4942561,rs4942561,rs4942561,rs4942561,rs4942561,rs4942561	0.00486386	0.00037716	TRUE	2.9076e-13	38.5545	0.226832	-0.226832
AIS	MO in the anterior limb of the right internal capsule	IDP.1543	8	rs4942561,rs4942561,rs4942561,rs4942561,rs4942561,rs4942561,rs4942561,rs4942561	0.00486386	0.000172919	TRUE	2.27812e-16	38.5545	0.226828	-0.226828
AIS	ISOVF in the posterior limb of the left internal capsule	IDP.2071	8	rs4942561,rs4942561,rs4942561,rs4942561,rs4942561,rs4942561,rs4942561,rs4942561	0.00486386	0.000394476	TRUE	4.6626e-13	38.5545	0.226832	-0.226832
AS	MD in the left superior thalamic radiation	IDP.1817	6	rs4942561,rs4942561,rs4942561,rs4942561,rs4942561,rs4942561	0.00352738	0.00024093	TRUE	7.1415e-11	43.5065	0.266476	-0.266476
AIS	MD in the left superior corona radiata	IDP.1627	7	rs4942561,rs4942561,rs4942561,rs4942561,rs4942561,rs4942561,rs4942561	0.00431266	0.000163362	TRUE	1.74716e-14	39.0766	0.2408	-0.2408
CES	MD in the splenium of corpus callosum	IDP.1606	4	rs6838973,rs6838973,rs6838973,rs6838973	0.0207868	7.85061e-05	TRUE	3.34177e-41	74.5504	0.10992	-0.10992
AS	ISOVF in the right anterior corona radiata	IDP.2074	4	rs4942561,rs4942561,rs4942561,rs4942561	0.00250574	0.000173865	TRUE	4.36357e-08	46.4579	0.315672	-0.315672
AS	MD in the right inferior longitudinal fasciculus	IDP.1809	6	rs4942561,rs4942561,rs4942561,rs4942561,rs4942561,rs4942561	0.00352738	0.000218021	TRUE	3.35962e-11	43.5065	0.266476	-0.266476
AIS	MD in the posterior limb of the left internal capsule	IDP.1621	7	rs4942561,rs4942561,rs4942561,rs4942561,rs4942561,rs4942561,rs4942561	0.0038986	0.000161006	TRUE	5.52629e-13	35.3562	0.2531	-0.2531
CES	MD in the right superior corona radiata	IDP.1626	4	rs6838973,rs6838973,rs6838973,rs6838973	0.0207868	0.000124022	TRUE	6.77563e-40	74.5504	0.10992	-0.10992
AIS	ISOVF in the right superior fronto-occipital fasciculus	IDP.2094	7	rs4942561,rs4942561,rs4942561,rs4942561,rs4942561,rs4942561,rs4942561	0.00423203	0.000205785	TRUE	1.95426e-13	38.2688	0.243321	-0.243321
AS	Thickness of the left rostral anterior cingulate cortex	IDP.1045	8	rs4942561,rs4942561,rs4942561,rs4942561,rs4942561,rs4942561,rs4942561,rs4942561	0.00447598	0.000207671	TRUE	4.02744e-15	41.4477	0.234271	-0.234271
AS	MD in the right anterior thalamic radiation	IDP.1797	8	rs4942561,rs4942561,rs4942561,rs4942561,rs4942561,rs4942561,rs4942561,rs4942561	0.00447598	0.000344266	TRUE	6.65657e-13	41.4477	0.236546	-0.236546
AS	MD in the right superior longitudinal fasciculus	IDP.1642	6	rs4942561,rs4942561,rs4942561,rs4942561,rs4942561,rs4942561	0.00352738	0.00021619	TRUE	3.15457e-11	43.5065	0.266472	-0.266472
AIS	MD in the left anterior corona radiata	IDP.1625	6	rs4942561,rs4942561,rs4942561,rs4942561,rs4942561,rs4942561	0.00380773	8.95411e-05	TRUE	3.6663e-14	40.2236	0.256295	-0.256295
AIS	ISOVF in the right superior thalamic radiation	IDP.2124	6	rs4942561,rs4942561,rs4942561,rs4942561,rs4942561,rs4942561	0.00352425	0.000308605	TRUE	1.37019e-09	37.1546	0.26664	-0.26664
AS	ICVF in the left posterior thalamic radiation	IDP.1931	5	rs475937,rs475937,rs475937,rs475937,rs475937	0.00288598	0.0001146	TRUE	1.6758e-10	42.6133	0.29486	-0.29486
AS	OD in the left posterior corona radiata	IDP.2004	4	rs2107595,rs2107595,rs2107595,rs2107595	0.00220634	0.000205931	TRUE	1.2732e-06	40.9396	0.336225	-0.336225
AIS	ICVF in the right tapetum	IDP.1948	6	rs473238,rs473238,rs473238,rs473238,rs473238,rs473238	0.00380989	0.00021441	TRUE	8.79354e-12	40.236	0.25626	-0.25626
AIS	MD in the left cingulum cingulate gyrus part	IDP.1637	7	rs4942561,rs4942561,rs4942561,rs4942561,rs4942561,rs4942561,rs4942561	0.00431266	0.000338892	TRUE	7.21525e-12	39.0766	0.2408	-0.2408
AS	OD in the right inferior cerebellar peduncle	IDP.1987	8	rs4942561,rs4942561,rs4942561,rs4942561,rs4942561,rs4942561,rs4942561,rs4942561	0.00447598	0.000166879	TRUE	1.03553e-15	41.4477	0.236546	-0.236546
AS	MD in the retrolenticular part of the right internal capsule	IDP.1622	7	rs4942561,rs4942561,rs4942561,rs4942561,rs4942561,rs4942561,rs4942561	0.00403672	0.000169042	TRUE	5.97596e-14	42.6855	0.249128	-0.249128
AS	ISOVF in the left inferior longitudinal fasciculus	IDP.2114	6	rs4942561,rs4942561,rs4942561,rs4942561,rs4942561,rs4942561	0.00354985	0.000397783	TRUE	3.87431e-09	43.8412	0.265465	-0.265465
CES	MD in the left superior corona radiata	IDP.1627	4	rs6838973,rs6838973,rs6838973,rs6838973	0.0207868	0.000124951	TRUE	7.15581e-40	74.5504	0.10992	-0.10992
AIS	ISOVF in the left acoustic radiation	IDP.2100	8	rs4942561,rs4942561,rs4942561,rs4942561,rs4942561,rs4942561,rs4942561,rs4942561	0.00486386	0.000138286	TRUE	4.18738e-17	38.5545	0.226836	-0.226836
AS	FA in the right superior fronto-occipital fasciculus	IDP.1494	5	rs475937,rs475937,rs475937,rs475937,rs475937	0.00288598	8.60529e-05	TRUE	4.09877e-11	42.6133	0.294855	-0.294855
AS	ICVF in the right posterior thalamic radiation	IDP.1930	6	rs4942561,rs4942561,rs4942561,rs4942561,rs4942561,rs4942561	0.00337273	0.000118304	TRUE	2.3688e-12	41.5072	0.272796	-0.272796
CES	ICVF in the left superior corona radiata	IDP.1927	4	rs6838973,rs6838973,rs6838973,rs6838973	0.0207868	8.56522e-05	TRUE	5.65497e-41	74.5504	0.109922	-0.109922
AS	MD in the left superior corona radiata	IDP.1627	6	rs4942561,rs4942561,rs4942561,rs4942561,rs4942561,rs4942561	0.00337273	0.00013593	TRUE	5.3906e-12	41.5072	0.272792	-0.272792
AIS	MO in the left cingulum cingulate gyrus part	IDP.1562	8	rs4942561,rs4942561,rs4942561,rs4942561,rs4942561,rs4942561,rs4942561,rs4942561	0.00486386	0.00016621	TRUE	1.66905e-16	38.5545	0.226828	-0.226828
AIS	MO in the left sagittal stratum	IDP.1558	8	rs4942561,rs4942561,rs4942561,rs4942561,rs4942561,rs4942561,rs4942561,rs4942561	0.00486386	0.000267021	TRUE	9.59191e-15	38.5545	0.226828	-0.226828
AS	ISOVF in the retrolenticular part of the left internal capsule	IDP.2073	7	rs4942561,rs4942561,rs4942561,rs4942561,rs4942561,rs4942561,rs4942561	0.00396665	0.000431062	TRUE	3.5063e-10	41.97	0.251238	-0.251238
AS	MD in the left acoustic radiation	IDP.1794	6	rs4942561,rs4942561,rs4942561,rs4942561,rs4942561,rs4942561	0.00320715	0.000144565	TRUE	3.45155e-11	39.5388	0.279482	-0.279482
AIS	ISOVF in the right posterior thalamic radiation	IDP.2080	5	rs473238,rs473238,rs473238,rs473238,rs473238	0.00317806	0.000119541	TRUE	4.55163e-11	40.1889	0.280796	-0.280796
AS	ISOVF in the left superior thalamic radiation	IDP.2123	5	rs475937,rs475937,rs475937,rs475937,rs475937	0.00271864	0.000301506	TRUE	2.40034e-07	40.2444	0.303394	-0.303394
AS	ISOVF in the right superior fronto-occipital fasciculus	IDP.2094	7	rs4942561,rs4942561,rs4942561,rs4942561,rs4942561,rs4942561,rs4942561	0.00396665	7.47875e-05	TRUE	6.92042e-16	41.97	0.251238	-0.251238
AIS	ISOVF in the right inferior longitudinal fasciculus	IDP.2115	4	rs473238,rs473238,rs473238,rs473238	0.00247029	9.84927e-05	TRUE	8.28553e-09	39.0208	0.318498	-0.318498
CES	Cortical surface area of the right lateral orbital frontal cortex	IDP.0693	4	rs6838973,rs6838973,rs6838973,rs6838973	0.0207868	0.000166921	TRUE	4.14735e-39	74.5504	0.108863	-0.108863
AS	ISOVF in the right posterior corona radiata	IDP.2078	4	rs2107595,rs2107595,rs2107595,rs2107595	0.00230185	0.00024829	TRUE	1.71247e-06	42.6384	0.329474	-0.329474
AS	ISOVF in the left external capsule	IDP.2085	3	rs4942561,rs4942561,rs4942561	0.00184176	5.92362e-05	TRUE	1.71213e-07	45.4082	0.368575	-0.368575
AIS	ISOVF in the anterior limb of the right internal capsule	IDP.2068	5	rs34311906,rs34311906,rs34311906,rs34311906,rs34311906	0.00322433	0.000176477	TRUE	2.90104e-10	40.722	0.278958	-0.278958
AS	ISOVF in the right external capsule	IDP.2084	2	rs4942561,rs4942561	0.00124801	3.74567e-05	TRUE	1.46027e-05	46.0384	0.448179	-0.448179
AS	ISOVF in the right anterior thalamic radiation	IDP.2103	7	rs4942561,rs4942561,rs4942561,rs4942561,rs4942561,rs4942561,rs4942561	0.00403672	0.000345349	TRUE	2.38557e-11	42.6855	0.249136	-0.249136
CES	ISOVF in the left anterior thalamic radiation	IDP.2102	4	rs6838973,rs6838973,rs6838973,rs6838973	0.0207868	8.89418e-05	TRUE	7.15133e-41	74.5504	0.109924	-0.109924
AS	MO in the left cingulum cingulate gyrus part	IDP.1562	7	rs4942561,rs4942561,rs4942561,rs4942561,rs4942561,rs4942561,rs4942561	0.00403672	0.000219179	TRUE	4.45087e-13	42.6855	0.249128	-0.249128
AIS	FA in the right anterior corona radiata	IDP.1474	6	rs473238,rs473238,rs473238,rs473238,rs473238,rs473238	0.00339583	0.000314589	TRUE	4.20325e-09	35.8999	0.271235	-0.271235
AIS	Thickness of the left banks superior temporal sulcus	IDP.1021	8	rs4942561,rs4942561,rs4942561,rs4942561,rs4942561,rs4942561,rs4942561,rs4942561	0.00486386	0.000403054	TRUE	4.15903e-13	38.5545	0.224647	-0.224647
AS	ISOVF in the right cingulum cingulate gyrus part	IDP.2086	2	rs2634074,rs2634074	0.00135501	0.000229736	TRUE	0.0013078	50.1772	0.429321	-0.429321
AS	ICVF in the right posterior corona radiata	IDP.1928	5	rs475937,rs475937,rs475937,rs475937,rs475937	0.00288598	0.000287788	TRUE	4.76661e-08	42.6133	0.29486	-0.29486
AS	ISOVF in the left cerebral peduncle	IDP.2067	8	rs4942561,rs4942561,rs4942561,rs4942561,rs4942561,rs4942561,rs4942561,rs4942561	0.00447598	6.78356e-05	TRUE	2.85294e-18	41.4477	0.236546	-0.236546
AS	FA in the right anterior thalamic radiation	IDP.1503	7	rs4942561,rs4942561,rs4942561,rs4942561,rs4942561,rs4942561,rs4942561	0.00371472	0.000388016	TRUE	8.80198e-10	39.2746	0.259683	-0.259683
AS	MD in the left anterior corona radiata	IDP.1625	6	rs4942561,rs4942561,rs4942561,rs4942561,rs4942561,rs4942561	0.00337273	0.000266871	TRUE	5.61267e-10	41.5072	0.272792	-0.272792
AIS	MD in the retrolenticular part of the right internal capsule	IDP.1622	8	rs4942561,rs4942561,rs4942561,rs4942561,rs4942561,rs4942561,rs4942561,rs4942561	0.00486386	0.000164845	TRUE	1.56516e-16	38.5545	0.226828	-0.226828
CES	Cortical surface area of the right inferior parietal cortex	IDP.0689	4	rs6838973,rs6838973,rs6838973,rs6838973	0.0207868	0.00013736	TRUE	8.64022e-40	74.5504	0.108863	-0.108863
AS	ICVF in the left superior fronto-occipital fasciculus	IDP.1945	5	rs4942561,rs4942561,rs4942561,rs4942561,rs4942561	0.00267062	0.000180043	TRUE	1.33102e-08	39.5367	0.306086	-0.306086
AIS	ISOVF in the right cerebral peduncle	IDP.2066	8	rs4942561,rs4942561,rs4942561,rs4942561,rs4942561,rs4942561,rs4942561,rs4942561	0.00486386	0.000317357	TRUE	5.0305e-14	38.5545	0.226832	-0.226832
AIS	OD in the right inferior cerebellar peduncle	IDP.1987	8	rs4942561,rs4942561,rs4942561,rs4942561,rs4942561,rs4942561,rs4942561,rs4942561	0.00486386	0.000177807	TRUE	2.84661e-16	38.5545	0.226832	-0.226832
CES	ICVF in the left posterior corona radiata	IDP.1929	4	rs6838973,rs6838973,rs6838973,rs6838973	0.0207868	5.38459e-05	TRUE	4.34603e-42	74.5504	0.109922	-0.109922
AIS	OD in the right anterior thalamic radiation	IDP.2028	8	rs4942561,rs4942561,rs4942561,rs4942561,rs4942561,rs4942561,rs4942561,rs4942561	0.00486386	0.000175036	TRUE	2.51292e-16	38.5545	0.226836	-0.226836
CES	MD in the left posterior corona radiata	IDP.1629	4	rs6838973,rs6838973,rs6838973,rs6838973	0.0207868	0.000128516	TRUE	8.80497e-40	74.5504	0.10992	-0.10992
AS	MD in the left cerebral peduncle	IDP.1617	7	rs4942561,rs4942561,rs4942561,rs4942561,rs4942561,rs4942561,rs4942561	0.00403672	0.000107677	TRUE	2.8336e-15	42.6855	0.249128	-0.249128
AS	FA in the right posterior thalamic radiation	IDP.1480	6	rs4942561,rs4942561,rs4942561,rs4942561,rs4942561,rs4942561	0.00337273	0.000103813	TRUE	1.13562e-12	41.5072	0.272792	-0.272792
AS	MD in the right superior thalamic radiation	IDP.1818	6	rs4942561,rs4942561,rs4942561,rs4942561,rs4942561,rs4942561	0.00352738	0.000201802	TRUE	1.90744e-11	43.5065	0.266476	-0.266476
AS	ISOVF in the right superior thalamic radiation	IDP.2124	5	rs4942561,rs4942561,rs4942561,rs4942561,rs4942561	0.00276805	0.000220858	TRUE	2.06109e-08	40.9891	0.300633	-0.300633
AIS	ISOVF in the right anterior corona radiata	IDP.2074	7	rs4942561,rs4942561,rs4942561,rs4942561,rs4942561,rs4942561,rs4942561	0.00423203	0.000191959	TRUE	1.14623e-13	38.2688	0.243321	-0.243321
AS	ISOVF in the right corticospinal tract	IDP.2058	7	rs475937,rs475937,rs475937,rs475937,rs475937,rs475937,rs475937	0.00398923	0.000227786	TRUE	9.1667e-13	42.2181	0.250502	-0.250502
AIS	Volume of the left fusiform gyrus	IDP.0349	8	rs4942561,rs4942561,rs4942561,rs4942561,rs4942561,rs4942561,rs4942561,rs4942561	0.00486386	0.000253649	TRUE	3.99968e-15	38.5545	0.224647	-0.224647
AS	OD in the left inferior cerebellar peduncle	IDP.1988	8	rs4942561,rs4942561,rs4942561,rs4942561,rs4942561,rs4942561,rs4942561,rs4942561	0.00447598	0.000284508	TRUE	1.03282e-13	41.4477	0.236546	-0.236546
AS	FA in the posterior limb of the left internal capsule	IDP.1471	7	rs4942561,rs4942561,rs4942561,rs4942561,rs4942561,rs4942561,rs4942561	0.00403672	0.000177228	TRUE	8.4926e-14	42.6855	0.249128	-0.249128
AIS	Thickness of the left fusiform gyrus	IDP.1026	6	rs473238,rs473238,rs473238,rs473238,rs473238,rs473238	0.00387938	4.42959e-05	TRUE	4.87337e-16	40.9431	0.251599	-0.251599
AS	ISOVF in the posterior limb of the right internal capsule	IDP.2070	6	rs4942561,rs4942561,rs4942561,rs4942561,rs4942561,rs4942561	0.00345434	0.000261626	TRUE	2.47127e-10	42.7058	0.268954	-0.268954
AS	MD in the right cingulum cingulate gyrus part	IDP.1636	6	rs4942561,rs4942561,rs4942561,rs4942561,rs4942561,rs4942561	0.00337273	0.000130889	TRUE	4.29043e-12	41.5072	0.272792	-0.272792
AIS	ISOVF in the splenium of corpus callosum	IDP.2056	8	rs4942561,rs4942561,rs4942561,rs4942561,rs4942561,rs4942561,rs4942561,rs4942561	0.00486386	8.30907e-05	TRUE	1.49137e-18	38.5545	0.226832	-0.226832
CES	ISOVF in the splenium of corpus callosum	IDP.2056	4	rs6838973,rs6838973,rs6838973,rs6838973	0.0207868	2.77189e-05	TRUE	2.60369e-43	74.5504	0.109922	-0.109922
AS	FA in the left external capsule	IDP.1485	7	rs4942561,rs4942561,rs4942561,rs4942561,rs4942561,rs4942561,rs4942561	0.00403672	0.000215534	TRUE	3.88721e-13	42.6855	0.249128	-0.249128
AIS	FA in the right cingulum hippocampus	IDP.1488	7	rs473238,rs473238,rs473238,rs473238,rs473238,rs473238,rs473238	0.00436109	0.000128491	TRUE	2.17877e-15	39.4688	0.239606	-0.239606
AS	MD in the left posterior thalamic radiation	IDP.1631	6	rs4942561,rs4942561,rs4942561,rs4942561,rs4942561,rs4942561	0.00337273	0.000180906	TRUE	3.3764e-11	41.5072	0.272792	-0.272792
AIS	FA in the left superior corona radiata	IDP.1477	8	rs4942561,rs4942561,rs4942561,rs4942561,rs4942561,rs4942561,rs4942561,rs4942561	0.00486386	0.000168634	TRUE	1.86925e-16	38.5545	0.226828	-0.226828
AIS	FA in the left posterior thalamic radiation	IDP.1481	7	rs4942561,rs4942561,rs4942561,rs4942561,rs4942561,rs4942561,rs4942561	0.00431266	0.000151214	TRUE	1.0091e-14	39.0766	0.2408	-0.2408
CES	Cortical surface area of the left pars opercularis	IDP.0665	4	rs6838973,rs6838973,rs6838973,rs6838973	0.0207868	8.25293e-05	TRUE	2.6224e-41	74.5504	0.108863	-0.108863
AS	FA in the right medial lemniscus	IDP.1460	7	rs475937,rs475937,rs475937,rs475937,rs475937,rs475937,rs475937	0.00398923	0.000225278	TRUE	8.37236e-13	42.2181	0.250498	-0.250498
AIS	FA in the anterior limb of the left internal capsule	IDP.1469	6	rs473238,rs473238,rs473238,rs473238,rs473238,rs473238	0.00339583	9.73769e-05	TRUE	2.29949e-12	35.8999	0.271235	-0.271235
AS	ISOVF in the anterior limb of the right internal capsule	IDP.2068	3	rs2634074,rs2634074,rs2634074	0.00186434	0.000209345	TRUE	2.02207e-05	45.9847	0.366261	-0.366261
AIS	ISOVF in the left posterior corona radiata	IDP.2079	6	rs473238,rs473238,rs473238,rs473238,rs473238,rs473238	0.00372926	0.00017713	TRUE	4.43284e-12	39.2945	0.259301	-0.259301
AIS	ISOVF in the left posterior thalamic radiation	IDP.2081	8	rs4942561,rs4942561,rs4942561,rs4942561,rs4942561,rs4942561,rs4942561,rs4942561	0.00486386	0.000498957	TRUE	6.14257e-12	38.5545	0.226832	-0.226832
CES	Cortical surface area of the right parahippocampal gyrus	IDP.0697	4	rs6838973,rs6838973,rs6838973,rs6838973	0.0207868	0.000144352	TRUE	1.27166e-39	74.5504	0.108863	-0.108863
CES	ISOVF in the right sagittal stratum	IDP.2082	4	rs6838973,rs6838973,rs6838973,rs6838973	0.0207868	0.000190081	TRUE	2.11777e-38	74.5504	0.109922	-0.109922
AIS	ISOVF in the right medial lemniscus	IDP.2060	7	rs473238,rs473238,rs473238,rs473238,rs473238,rs473238,rs473238	0.00436109	0.000119605	TRUE	1.36721e-15	39.4688	0.23961	-0.23961
AIS	MD in the left posterior corona radiata	IDP.1629	7	rs4942561,rs4942561,rs4942561,rs4942561,rs4942561,rs4942561,rs4942561	0.00431266	0.000167075	TRUE	2.05594e-14	39.0766	0.2408	-0.2408
AIS	ISOVF in the left anterior thalamic radiation	IDP.2102	7	rs4942561,rs4942561,rs4942561,rs4942561,rs4942561,rs4942561,rs4942561	0.00423203	2.962e-05	TRUE	5.60348e-18	38.2688	0.243325	-0.243325
AS	ISOVF in the left superior fronto-occipital fasciculus	IDP.2095	8	rs4942561,rs4942561,rs4942561,rs4942561,rs4942561,rs4942561,rs4942561,rs4942561	0.00447598	0.000213456	TRUE	7.75331e-15	41.4477	0.236546	-0.236546
AS	FA in the forceps minor	IDP.1511	7	rs4942561,rs4942561,rs4942561,rs4942561,rs4942561,rs4942561,rs4942561	0.00403672	0.000220449	TRUE	4.66712e-13	42.6855	0.249132	-0.249132
AS	FA in the right cerebral peduncle	IDP.1466	7	rs4942561,rs4942561,rs4942561,rs4942561,rs4942561,rs4942561,rs4942561	0.00403672	0.000157261	TRUE	3.53536e-14	42.6855	0.249128	-0.249128
AS	ISOVF in the right posterior thalamic radiation	IDP.2080	5	rs2634074,rs2634074,rs2634074,rs2634074,rs2634074	0.0030631	0.000110911	TRUE	2.81712e-11	45.4114	0.285658	-0.285658
AS	FA in the right anterior corona radiata	IDP.1474	4	rs475937,rs475937,rs475937,rs475937	0.00218386	0.000165289	TRUE	4.90674e-07	40.4388	0.33829	-0.33829
CES	Volume of the right hippocampus	IDP.0020	4	rs6838973,rs6838973,rs6838973,rs6838973	0.0207868	0.000181643	TRUE	3.18303e-39	74.5504	0.106806	-0.106806
AS	MD in the left posterior corona radiata	IDP.1629	6	rs4942561,rs4942561,rs4942561,rs4942561,rs4942561,rs4942561	0.00337273	0.000113522	TRUE	1.86968e-12	41.5072	0.272792	-0.272792
AS	ISOVF in the genu of corpus callosum	IDP.2054	7	rs475937,rs475937,rs475937,rs475937,rs475937,rs475937,rs475937	0.00398923	0.000106502	TRUE	4.14263e-15	42.2181	0.250502	-0.250502
AS	ISOVF in the left inferior fronto-occipital fasciculus	IDP.2112	6	rs4942561,rs4942561,rs4942561,rs4942561,rs4942561,rs4942561	0.00354985	0.000315084	TRUE	5.13199e-10	43.8412	0.265465	-0.265465
CES	FA in the left posterior corona radiata	IDP.1479	4	rs6838973,rs6838973,rs6838973,rs6838973	0.0207868	0.000123261	TRUE	6.47815e-40	74.5504	0.10992	-0.10992
AS	FA in the anterior limb of the right internal capsule	IDP.1468	8	rs4942561,rs4942561,rs4942561,rs4942561,rs4942561,rs4942561,rs4942561,rs4942561	0.00447598	0.000316121	TRUE	2.84932e-13	41.4477	0.236543	-0.236543
AS	OD in the right cerebral peduncle	IDP.1991	7	rs475937,rs475937,rs475937,rs475937,rs475937,rs475937,rs475937	0.00398923	0.000374345	TRUE	7.46236e-11	42.2181	0.250502	-0.250502
AS	MD in the left cingulum cingulate gyrus part	IDP.1637	6	rs4942561,rs4942561,rs4942561,rs4942561,rs4942561,rs4942561	0.00337273	0.000132794	TRUE	4.67992e-12	41.5072	0.272792	-0.272792
AS	ISOVF in the splenium of corpus callosum	IDP.2056	8	rs4942561,rs4942561,rs4942561,rs4942561,rs4942561,rs4942561,rs4942561,rs4942561	0.00447598	0.000124625	TRUE	1.20227e-16	41.4477	0.236546	-0.236546
CES	Thickness of the left posterior-cingulate cortex	IDP.1042	4	rs6838973,rs6838973,rs6838973,rs6838973	0.0207868	5.32523e-05	TRUE	2.3615e-42	74.5504	0.108865	-0.108865
AIS	MD in the splenium of corpus callosum	IDP.1606	6	rs473238,rs473238,rs473238,rs473238,rs473238,rs473238	0.00380989	4.95847e-05	TRUE	2.2768e-15	40.236	0.256256	-0.256256
AIS	OD in the left inferior cerebellar peduncle	IDP.1988	8	rs4942561,rs4942561,rs4942561,rs4942561,rs4942561,rs4942561,rs4942561,rs4942561	0.00486386	0.000257883	TRUE	6.95491e-15	38.5545	0.226832	-0.226832
AIS	MD in the right anterior thalamic radiation	IDP.1797	7	rs4942561,rs4942561,rs4942561,rs4942561,rs4942561,rs4942561,rs4942561	0.00431266	0.000167362	TRUE	2.08306e-14	39.0766	0.240804	-0.240804
AS	FA in the right external capsule	IDP.1484	7	rs4942561,rs4942561,rs4942561,rs4942561,rs4942561,rs4942561,rs4942561	0.00381199	0.000196862	TRUE	1.35297e-12	40.2548	0.25651	-0.25651
AIS	ICVF in the right posterior corona radiata	IDP.1928	6	rs473238,rs473238,rs473238,rs473238,rs473238,rs473238	0.00380989	0.000157755	TRUE	1.02988e-12	40.236	0.25626	-0.25626
AS	ICVF in the left tapetum	IDP.1949	5	rs475937,rs475937,rs475937,rs475937,rs475937	0.00288598	0.000149885	TRUE	7.25932e-10	42.6133	0.29486	-0.29486
CES	Thickness of the right lingual gyrus	IDP.1066	4	rs6838973,rs6838973,rs6838973,rs6838973	0.0207868	0.000228952	TRUE	7.20412e-38	74.5504	0.108863	-0.108863
CES	ISOVF in the anterior limb of the left internal capsule	IDP.2069	4	rs6838973,rs6838973,rs6838973,rs6838973	0.0207868	0.00010024	TRUE	1.54289e-40	74.5504	0.109922	-0.109922
AIS	FA in the anterior limb of the right internal capsule	IDP.1468	8	rs4942561,rs4942561,rs4942561,rs4942561,rs4942561,rs4942561,rs4942561,rs4942561	0.00486386	0.000249169	TRUE	5.07678e-15	38.5545	0.226828	-0.226828
AIS	Thickness of the left entorhinal cortex	IDP.1025	7	rs4942561,rs4942561,rs4942561,rs4942561,rs4942561,rs4942561,rs4942561	0.00435893	0.000217979	TRUE	7.435e-14	39.4582	0.237337	-0.237337
CES	ISOVF in the right superior corona radiata	IDP.2076	4	rs6838973,rs6838973,rs6838973,rs6838973	0.0207868	0.000196297	TRUE	2.8225e-38	74.5504	0.109922	-0.109922
AS	ICVF in the left posterior corona radiata	IDP.1929	5	rs475937,rs475937,rs475937,rs475937,rs475937	0.00288598	0.000168271	TRUE	1.42926e-09	42.6133	0.29486	-0.29486
AS	FA in the right tapetum	IDP.1498	5	rs475937,rs475937,rs475937,rs475937,rs475937	0.00288598	0.000265017	TRUE	2.67466e-08	42.6133	0.294855	-0.294855
AS	Thickness of the left entorhinal cortex	IDP.1025	7	rs4942561,rs4942561,rs4942561,rs4942561,rs4942561,rs4942561,rs4942561	0.00405919	0.000145547	TRUE	1.11005e-14	42.9727	0.245913	-0.245913
CES	ISOVF in the right anterior thalamic radiation	IDP.2103	4	rs6838973,rs6838973,rs6838973,rs6838973	0.0207868	0.000210917	TRUE	5.44546e-38	74.5504	0.109924	-0.109924
AS	ICVF in the right superior corona radiata	IDP.1926	6	rs4942561,rs4942561,rs4942561,rs4942561,rs4942561,rs4942561	0.00337273	0.00015801	TRUE	1.38356e-11	41.5072	0.272796	-0.272796
AS	FA in the left anterior thalamic radiation	IDP.1502	4	rs4942561,rs4942561,rs4942561,rs4942561	0.00210214	0.000157484	TRUE	7.64475e-07	38.7134	0.345736	-0.345736
CES	Thickness of the right precentral gyrus	IDP.1077	4	rs6838973,rs6838973,rs6838973,rs6838973	0.0207868	0.000107983	TRUE	1.49631e-40	74.5504	0.108863	-0.108863
AS	ISOVF in the right superior longitudinal fasciculus	IDP.2092	2	rs2634074,rs2634074	0.00142524	2.6768e-05	TRUE	1.33002e-06	52.8753	0.41824	-0.41824
AS	ISOVF in the left superior longitudinal fasciculus	IDP.2093	3	rs475937,rs475937,rs475937	0.00184203	2.83415e-05	TRUE	2.39671e-08	45.4556	0.368383	-0.368383
AIS	FA in the left inferior cerebellar peduncle	IDP.1463	8	rs4942561,rs4942561,rs4942561,rs4942561,rs4942561,rs4942561,rs4942561,rs4942561	0.00486386	0.000102681	TRUE	5.4704e-18	38.5545	0.226828	-0.226828
AIS	ISOVF in the forceps minor	IDP.2111	5	rs473238,rs473238,rs473238,rs473238,rs473238	0.00317806	9.10067e-05	TRUE	1.14836e-11	40.1889	0.2808	-0.2808
AS	ISOVF in the right inferior fronto-occipital fasciculus	IDP.2113	4	rs4942561,rs4942561,rs4942561,rs4942561	0.00234933	0.00017507	TRUE	1.67151e-07	43.4535	0.326381	-0.326381
CES	Cortical surface area of the right banks superior temporal sulcus	IDP.0683	4	rs6838973,rs6838973,rs6838973,rs6838973	0.0207868	0.000182679	TRUE	8.99491e-39	74.5504	0.108863	-0.108863
AS	FA in the left posterior corona radiata	IDP.1479	4	rs475937,rs475937,rs475937,rs475937	0.00228113	4.11232e-05	TRUE	8.30956e-10	42.149	0.331371	-0.331371
AS	ISOVF in the left anterior corona radiata	IDP.2075	6	rs4942561,rs4942561,rs4942561,rs4942561,rs4942561,rs4942561	0.00354985	0.000329585	TRUE	7.5002e-10	43.8412	0.26546	-0.26546
AS	ISOVF in the right sagittal stratum	IDP.2082	4	rs2634074,rs2634074,rs2634074,rs2634074	0.00245826	0.000292821	TRUE	1.4208e-06	45.6425	0.318472	-0.318472
AS	FA in the right inferior longitudinal fasciculus	IDP.1515	3	rs2634074,rs2634074,rs2634074	0.00195985	3.31037e-05	TRUE	1.07993e-08	48.2483	0.357583	-0.357583
AS	FA in the left inferior cerebellar peduncle	IDP.1463	8	rs4942561,rs4942561,rs4942561,rs4942561,rs4942561,rs4942561,rs4942561,rs4942561	0.00447598	0.000128454	TRUE	1.48477e-16	41.4477	0.236543	-0.236543
AS	OD in the right external capsule	IDP.2009	8	rs4942561,rs4942561,rs4942561,rs4942561,rs4942561,rs4942561,rs4942561,rs4942561	0.00447598	0.000123621	TRUE	1.1366e-16	41.4477	0.236546	-0.236546
AS	MD in the posterior limb of the right internal capsule	IDP.1620	7	rs4942561,rs4942561,rs4942561,rs4942561,rs4942561,rs4942561,rs4942561	0.00403672	0.000271402	TRUE	2.68362e-12	42.6855	0.249128	-0.249128
AIS	ISOVF in the right external capsule	IDP.2084	5	rs4942561,rs4942561,rs4942561,rs4942561,rs4942561	0.00304255	0.000121282	TRUE	1.58414e-10	38.4709	0.286977	-0.286977
AS	MO in the right sagittal stratum	IDP.1557	8	rs4942561,rs4942561,rs4942561,rs4942561,rs4942561,rs4942561,rs4942561,rs4942561	0.00447598	0.000120541	TRUE	9.54319e-17	41.4477	0.236543	-0.236543
AIS	FA in the right inferior cerebellar peduncle	IDP.1462	8	rs4942561,rs4942561,rs4942561,rs4942561,rs4942561,rs4942561,rs4942561,rs4942561	0.00486386	0.000127916	TRUE	2.3963e-17	38.5545	0.226828	-0.226828
AS	ISOVF in the left posterior thalamic radiation	IDP.2081	8	rs4942561,rs4942561,rs4942561,rs4942561,rs4942561,rs4942561,rs4942561,rs4942561	0.00447598	0.000424125	TRUE	5.83564e-12	41.4477	0.236546	-0.236546
AS	ICVF in the right tapetum	IDP.1948	6	rs475937,rs475937,rs475937,rs475937,rs475937,rs475937	0.00332524	0.000266907	TRUE	8.2709e-10	40.9627	0.274597	-0.274597
AIS	ISOVF in the right sagittal stratum	IDP.2082	6	rs473238,rs473238,rs473238,rs473238,rs473238,rs473238	0.00372926	0.00014947	TRUE	1.44737e-12	39.2945	0.259301	-0.259301
AS	ISOVF in the left inferior cerebellar peduncle	IDP.2063	8	rs4942561,rs4942561,rs4942561,rs4942561,rs4942561,rs4942561,rs4942561,rs4942561	0.00447598	0.000243134	TRUE	2.42608e-14	41.4477	0.236546	-0.236546
AS	ICVF in the left superior corona radiata	IDP.1927	6	rs4942561,rs4942561,rs4942561,rs4942561,rs4942561,rs4942561	0.00337273	0.000116473	TRUE	2.16561e-12	41.5072	0.272796	-0.272796
CES	ISOVF in the anterior limb of the right internal capsule	IDP.2068	4	rs6838973,rs6838973,rs6838973,rs6838973	0.0207868	4.87932e-05	TRUE	2.69988e-42	74.5504	0.109922	-0.109922
AIS	OD in the right sagittal stratum	IDP.2007	8	rs4942561,rs4942561,rs4942561,rs4942561,rs4942561,rs4942561,rs4942561,rs4942561	0.00486386	0.000160383	TRUE	1.2668e-16	38.5545	0.226832	-0.226832
AIS	ISOVF in the left inferior fronto-occipital fasciculus	IDP.2112	6	rs4942561,rs4942561,rs4942561,rs4942561,rs4942561,rs4942561	0.00368083	0.000202957	TRUE	1.70689e-11	38.8375	0.26082	-0.26082
AS	ISOVF in the anterior limb of the left internal capsule	IDP.2069	6	rs4942561,rs4942561,rs4942561,rs4942561,rs4942561,rs4942561	0.00337273	0.000151981	TRUE	1.07907e-11	41.5072	0.272796	-0.272796
AS	ISOVF in the right acoustic radiation	IDP.2101	2	rs2634074,rs2634074	0.00135501	0.000133178	TRUE	0.000176264	50.1772	0.429328	-0.429328
AS	FA in the anterior limb of the left internal capsule	IDP.1469	7	rs4942561,rs4942561,rs4942561,rs4942561,rs4942561,rs4942561,rs4942561	0.00371472	0.000289997	TRUE	6.76239e-11	39.2746	0.259679	-0.259679
AIS	MO in the right sagittal stratum	IDP.1557	8	rs4942561,rs4942561,rs4942561,rs4942561,rs4942561,rs4942561,rs4942561,rs4942561	0.00486386	0.000141153	TRUE	4.85511e-17	38.5545	0.226828	-0.226828
AIS	ISOVF in the right superior longitudinal fasciculus	IDP.2092	5	rs473238,rs473238,rs473238,rs473238,rs473238	0.00302148	6.91427e-05	TRUE	1.38266e-11	38.1715	0.288098	-0.288098
AS	MD in the forceps minor	IDP.1805	5	rs475937,rs475937,rs475937,rs475937,rs475937	0.00304063	0.000150288	TRUE	1.89962e-10	45.0102	0.286925	-0.286925
AS	ISOVF in the forceps minor	IDP.2111	3	rs2634074,rs2634074,rs2634074	0.00201899	0.000109082	TRUE	3.05017e-07	49.9715	0.351381	-0.351381
AS	Volume of the right pars orbitalis	IDP.0394	7	rs4942561,rs4942561,rs4942561,rs4942561,rs4942561,rs4942561,rs4942561	0.00381199	0.000257878	TRUE	8.26743e-12	40.2548	0.25405	-0.25405
AIS	OD in the retrolenticular part of the left internal capsule	IDP.1998	7	rs473238,rs473238,rs473238,rs473238,rs473238,rs473238,rs473238	0.00436109	9.44863e-05	TRUE	3.23072e-16	39.4688	0.23961	-0.23961
AIS	FA in the left cingulum hippocampus	IDP.1489	7	rs473238,rs473238,rs473238,rs473238,rs473238,rs473238,rs473238	0.00436109	6.40229e-05	TRUE	3.98734e-17	39.4688	0.239606	-0.239606
AIS	ISOVF in the right anterior thalamic radiation	IDP.2103	7	rs4942561,rs4942561,rs4942561,rs4942561,rs4942561,rs4942561,rs4942561	0.00423203	0.000119928	TRUE	4.39634e-15	38.2688	0.243325	-0.243325
CES	ISOVF in the right cerebral peduncle	IDP.2066	4	rs6838973,rs6838973,rs6838973,rs6838973	0.0207868	0.00011638	TRUE	4.29132e-40	74.5504	0.109922	-0.109922
AS	MD in the posterior limb of the left internal capsule	IDP.1621	6	rs4942561,rs4942561,rs4942561,rs4942561,rs4942561,rs4942561	0.00344296	0.000162811	TRUE	9.034e-12	42.4102	0.269882	-0.269882
AIS	ISOVF in the right inferior fronto-occipital fasciculus	IDP.2113	6	rs4942561,rs4942561,rs4942561,rs4942561,rs4942561,rs4942561	0.00326677	0.000260418	TRUE	2.76427e-09	34.5025	0.276664	-0.276664
AIS	OD in the right external capsule	IDP.2009	8	rs4942561,rs4942561,rs4942561,rs4942561,rs4942561,rs4942561,rs4942561,rs4942561	0.00486386	0.000107156	TRUE	7.21776e-18	38.5545	0.226832	-0.226832
CES	Thickness of the left caudal anterior-cingulate cortex	IDP.1022	4	rs6838973,rs6838973,rs6838973,rs6838973	0.0207868	3.61837e-05	TRUE	4.11664e-43	74.5504	0.108865	-0.108865
AIS	Volume of the right lateral orbital frontal cortex	IDP.0387	8	rs4942561,rs4942561,rs4942561,rs4942561,rs4942561,rs4942561,rs4942561,rs4942561	0.00486386	0.000292942	TRUE	1.57019e-14	38.5545	0.224647	-0.224647
AIS	ISOVF in the left inferior cerebellar peduncle	IDP.2063	8	rs4942561,rs4942561,rs4942561,rs4942561,rs4942561,rs4942561,rs4942561,rs4942561	0.00486386	0.000205488	TRUE	9.36987e-16	38.5545	0.226832	-0.226832
CES	ISOVF in the left cerebral peduncle	IDP.2067	4	rs6838973,rs6838973,rs6838973,rs6838973	0.0207868	8.7921e-05	TRUE	6.64812e-41	74.5504	0.109922	-0.109922
AIS	MO in the left inferior cerebellar peduncle	IDP.1538	8	rs4942561,rs4942561,rs4942561,rs4942561,rs4942561,rs4942561,rs4942561,rs4942561	0.00486386	0.000215169	TRUE	1.38702e-15	38.5545	0.226828	-0.226828
AIS	ISOVF in the left superior longitudinal fasciculus	IDP.2093	5	rs473238,rs473238,rs473238,rs473238,rs473238	0.00302148	1.40847e-05	TRUE	1.17122e-13	38.1715	0.288098	-0.288098
AIS	MD in the left cerebral peduncle	IDP.1617	8	rs4942561,rs4942561,rs4942561,rs4942561,rs4942561,rs4942561,rs4942561,rs4942561	0.00486386	7.71409e-05	TRUE	9.69901e-19	38.5545	0.226828	-0.226828
AIS	ISOVF in the right acoustic radiation	IDP.2101	5	rs473238,rs473238,rs473238,rs473238,rs473238	0.00324755	0.000152675	TRUE	9.93611e-11	41.0363	0.277895	-0.277895
AS	MD in the right inferior fronto-occipital fasciculus	IDP.1807	5	rs4942561,rs4942561,rs4942561,rs4942561,rs4942561	0.0028634	7.32678e-05	TRUE	2.46565e-11	42.2667	0.296063	-0.296063
AIS	ISOVF in the left inferior longitudinal fasciculus	IDP.2114	3	rs34311906,rs34311906,rs34311906	0.00196536	1.37829e-05	TRUE	4.03516e-09	41.335	0.357239	-0.357239
AS	OD in the right anterior thalamic radiation	IDP.2028	8	rs4942561,rs4942561,rs4942561,rs4942561,rs4942561,rs4942561,rs4942561,rs4942561	0.00447598	0.000151293	TRUE	4.89095e-16	41.4477	0.23655	-0.23655
CES	Thickness of the right lateral occipital cortex	IDP.1064	4	rs6838973,rs6838973,rs6838973,rs6838973	0.0207868	9.41048e-05	TRUE	5.97311e-41	74.5504	0.108863	-0.108863
AIS	ISOVF in the left superior thalamic radiation	IDP.2123	5	rs473238,rs473238,rs473238,rs473238,rs473238	0.00302148	8.26091e-05	TRUE	2.97801e-11	38.1715	0.288102	-0.288102
AS	MD in the left external capsule	IDP.1635	5	rs4942561,rs4942561,rs4942561,rs4942561,rs4942561	0.00269782	0.000107228	TRUE	6.59352e-10	39.907	0.304661	-0.304661
CES	ISOVF in the right posterior thalamic radiation	IDP.2080	4	rs6838973,rs6838973,rs6838973,rs6838973	0.0207868	0.000262618	TRUE	4.61292e-37	74.5504	0.109922	-0.109922
AIS	ISOVF in the left cerebral peduncle	IDP.2067	8	rs4942561,rs4942561,rs4942561,rs4942561,rs4942561,rs4942561,rs4942561,rs4942561	0.00486386	0.000230432	TRUE	2.52262e-15	38.5545	0.226832	-0.226832
AIS	Thickness of the left precuneus cortex	IDP.1044	8	rs4942561,rs4942561,rs4942561,rs4942561,rs4942561,rs4942561,rs4942561,rs4942561	0.00486386	0.00033051	TRUE	5.20811e-14	38.5545	0.224647	-0.224647
AS	FA in the left posterior thalamic radiation	IDP.1481	6	rs4942561,rs4942561,rs4942561,rs4942561,rs4942561,rs4942561	0.00337273	0.000109287	TRUE	1.50921e-12	41.5072	0.272792	-0.272792
AS	MD in the right tapetum	IDP.1648	3	rs475937,rs475937,rs475937	0.00151988	8.34304e-05	TRUE	9.37979e-06	37.3934	0.406085	-0.406085
AS	MD in the right external capsule	IDP.1634	5	rs4942561,rs4942561,rs4942561,rs4942561,rs4942561	0.00269782	6.42139e-05	TRUE	6.8941e-11	39.907	0.304661	-0.304661
AIS	ISOVF in the left anterior corona radiata	IDP.2075	7	rs4942561,rs4942561,rs4942561,rs4942561,rs4942561,rs4942561,rs4942561	0.00423203	0.000201961	TRUE	1.69008e-13	38.2688	0.243321	-0.243321
AS	FA in the right inferior cerebellar peduncle	IDP.1462	8	rs4942561,rs4942561,rs4942561,rs4942561,rs4942561,rs4942561,rs4942561,rs4942561	0.00447598	0.000139186	TRUE	2.6364e-16	41.4477	0.236543	-0.236543
CES	Cortical surface area of the left fusiform gyrus	IDP.0654	4	rs6838973,rs6838973,rs6838973,rs6838973	0.0207868	1.19459e-05	TRUE	1.20011e-44	74.5504	0.108863	-0.108863
CES	MD in the right cerebral peduncle	IDP.1616	4	rs6838973,rs6838973,rs6838973,rs6838973	0.0207868	7.54792e-05	TRUE	2.65489e-41	74.5504	0.10992	-0.10992
AIS	FA in the left superior thalamic radiation	IDP.1523	6	rs4942561,rs4942561,rs4942561,rs4942561,rs4942561,rs4942561	0.00387722	5.92816e-05	TRUE	2.59759e-15	40.9307	0.254084	-0.254084
CES	Volume of the left fusiform gyrus	IDP.0349	4	rs6838973,rs6838973,rs6838973,rs6838973	0.0207868	3.77219e-05	TRUE	4.8902e-43	74.5504	0.108863	-0.108863
AS	MD in the splenium of corpus callosum	IDP.1606	5	rs4942561,rs4942561,rs4942561,rs4942561,rs4942561	0.00295594	0.000175017	TRUE	9.94359e-10	43.6673	0.291285	-0.291285
AS	Volume of the left amygdala	IDP.0021	8	rs4942561,rs4942561,rs4942561,rs4942561,rs4942561,rs4942561,rs4942561,rs4942561	0.00447598	0.000240591	TRUE	6.58324e-15	41.4477	0.229842	-0.229842
AS	OD in the right sagittal stratum	IDP.2007	8	rs4942561,rs4942561,rs4942561,rs4942561,rs4942561,rs4942561,rs4942561,rs4942561	0.00447598	0.000139132	TRUE	2.63092e-16	41.4477	0.236546	-0.236546
AS	ISOVF in the right cerebral peduncle	IDP.2066	7	rs4942561,rs4942561,rs4942561,rs4942561,rs4942561,rs4942561,rs4942561	0.00381199	0.000264776	TRUE	1.41676e-11	40.2548	0.256514	-0.256514
AIS	Volume of the right pars orbitalis	IDP.0394	8	rs4942561,rs4942561,rs4942561,rs4942561,rs4942561,rs4942561,rs4942561,rs4942561	0.00486386	0.000320473	TRUE	3.82046e-14	38.5545	0.224654	-0.224654
AIS	ISOVF in the retrolenticular part of the right internal capsule	IDP.2072	7	rs473238,rs473238,rs473238,rs473238,rs473238,rs473238,rs473238	0.00436109	0.000111016	TRUE	8.53483e-16	39.4688	0.23961	-0.23961
CES	Cortical surface area of the right middle temporal gyrus	IDP.0696	4	rs6838973,rs6838973,rs6838973,rs6838973	0.0207868	8.9346e-05	TRUE	4.28788e-41	74.5504	0.108863	-0.108863
AS	MO in the left inferior cerebellar peduncle	IDP.1538	8	rs4942561,rs4942561,rs4942561,rs4942561,rs4942561,rs4942561,rs4942561,rs4942561	0.00447598	0.000233886	TRUE	1.71637e-14	41.4477	0.236543	-0.236543
AS	ISOVF in the right medial lemniscus	IDP.2060	7	rs475937,rs475937,rs475937,rs475937,rs475937,rs475937,rs475937	0.00398923	0.000126996	TRUE	1.26106e-14	42.2181	0.250502	-0.250502

## Sheet: Table S9
Table S9: Forward MR analysis results
						IVW				MR-RAPS				Weighted Median				Weighted Mode				MR-Egger				Wald ratio
IDP name	IDP ID	Outcome (Disorder)	IVs N	IDP SD	IDP Unit	Estimate (OR)	95% lower CI	95% upper CI	P value	Estimate (OR)	95% lower CI	95% upper CI	P value	Estimate (OR)	95% lower CI	95% upper CI	P value	Estimate (OR)	95% lower CI	95% upper CI	P value	Estimate (OR)	95% lower CI	95% upper CI	P value	Estimate (OR)	95% lower CI	95% upper CI	P value
MD in the anterior limb of the right internal capsule	IDP.1618	AS	12	3.76e-05	AU	1.44	1.3	1.59	9.73e-13	1.45	1.3	1.61	3.09e-11	1.42	1.24	1.63	5.64e-07	1.46	1.13	1.88	0.00727	1.08	0.57	2.06	0.78	NA	NA	NA	NA
MD in the right external capsule	IDP.1634	SVS	10	3.74e-05	AU	2.76	2.07	3.68	5.87e-12	2.95	2.15	4.05	2.39e-11	2.98	1.98	4.51	1.97e-07	3.42	1.38	8.48	0.01	1.17	0.2	6.99	0.84	NA	NA	NA	NA
MD in the anterior limb of the right internal capsule	IDP.1618	AIS	13	3.76e-05	AU	1.39	1.25	1.54	5.25e-10	1.39	1.25	1.56	4.67e-09	1.37	1.19	1.58	8.35e-06	1.53	1.15	2.03	0.0071	1.49	0.77	2.88	0.21	NA	NA	NA	NA
MD in the right superior fronto-occipital fasciculus	IDP.1644	AS	10	7.43e-05	AU	1.39	1.25	1.56	6.7e-09	1.42	1.27	1.59	2.08e-09	1.43	1.23	1.66	3.44e-06	1.5	1.14	1.98	0.00843	1.09	0.64	1.87	0.71	NA	NA	NA	NA
MD in the anterior limb of the left internal capsule	IDP.1619	AS	13	3.77e-05	AU	1.32	1.2	1.45	2.42e-08	1.33	1.19	1.47	1.71e-07	1.28	1.11	1.47	0.000513	1.17	0.9	1.53	0.23	1.42	0.78	2.59	0.22	NA	NA	NA	NA
MD in the right superior fronto-occipital fasciculus	IDP.1644	SVS	8	7.43e-05	AU	2.35	1.74	3.17	2.65e-08	2.43	1.8	3.27	5.58e-09	2.64	1.8	3.87	7.29e-07	2.84	1.47	5.49	0.00722	3.41	0.74	15.73	0.1	NA	NA	NA	NA
MD in the anterior limb of the left internal capsule	IDP.1619	SVS	14	3.77e-05	AU	2.22	1.66	2.97	6.28e-08	2.35	1.74	3.18	3.29e-08	1.99	1.37	2.89	0.000302	1.57	0.73	3.39	0.22	2.3	0.32	16.43	0.37	NA	NA	NA	NA
MD in the left superior fronto-occipital fasciculus	IDP.1645	AS	9	9.39e-05	AU	1.39	1.23	1.58	1.49e-07	1.41	1.24	1.6	8.05e-08	1.48	1.26	1.72	7.65e-07	1.52	1.12	2.05	0.01	1.24	0.56	2.73	0.54	NA	NA	NA	NA
ISOVF in the anterior limb of the left internal capsule	IDP.2069	AS	8	0.02	AU	1.44	1.25	1.65	2.65e-07	1.44	1.24	1.68	1.37e-06	1.51	1.25	1.82	1.73e-05	1.55	1.06	2.27	0.03	2	0.79	5.09	0.12	NA	NA	NA	NA
MD in the left superior corona radiata	IDP.1627	CES	24	3.72e-05	AU	1.45	1.25	1.68	6.77e-07	1.46	1.25	1.71	1.61e-06	1.47	1.18	1.83	0.000604	1.57	1.11	2.22	0.01	1.7	0.99	2.91	0.06	NA	NA	NA	NA
MD in the anterior limb of the right internal capsule	IDP.1618	SVS	15	3.76e-05	AU	2.02	1.53	2.67	7.51e-07	2.08	1.53	2.81	2.31e-06	1.7	1.19	2.43	0.00324	1.31	0.59	2.92	0.48	5.74	0.83	39.91	0.07	NA	NA	NA	NA
ISOVF in the right posterior corona radiata	IDP.2078	AS	8	0.02	AU	1.32	1.18	1.47	8.74e-07	1.34	1.19	1.51	1.02e-06	1.38	1.2	1.59	9.3e-06	1.39	1.06	1.82	0.02	1.27	0.68	2.37	0.38	NA	NA	NA	NA
MD in the right superior fronto-occipital fasciculus	IDP.1644	AIS	11	7.43e-05	AU	1.38	1.21	1.57	1.06e-06	1.4	1.24	1.57	1.86e-08	1.42	1.21	1.65	1.02e-05	1.41	1.06	1.87	0.02	0.98	0.53	1.81	0.94	NA	NA	NA	NA
ISOVF in the left superior corona radiata	IDP.2077	AS	11	0.02	AU	1.32	1.17	1.49	3.57e-06	1.35	1.2	1.53	8.29e-07	1.41	1.2	1.66	3.35e-05	1.46	1.02	2.09	0.04	0.85	0.43	1.69	0.61	NA	NA	NA	NA
MD in the anterior limb of the left internal capsule	IDP.1619	AIS	14	3.77e-05	AU	1.28	1.15	1.42	5.32e-06	1.29	1.16	1.44	3.44e-06	1.25	1.09	1.44	0.00155	1.19	0.88	1.62	0.24	1.63	0.86	3.11	0.12	NA	NA	NA	NA
MD in the left posterior corona radiata	IDP.1629	CES	23	5.39e-05	AU	1.41	1.22	1.64	6.35e-06	1.45	1.23	1.69	4.95e-06	1.59	1.27	1.99	6.4e-05	1.68	1.22	2.3	0.00273	1.47	0.88	2.45	0.13	NA	NA	NA	NA
ISOVF in the anterior limb of the left internal capsule	IDP.2069	SVS	10	0.02	AU	1.97	1.47	2.66	6.91e-06	1.96	1.43	2.7	3.16e-05	1.73	1.13	2.65	0.01	1.5	0.64	3.52	0.32	3.83	0.4	36.73	0.21	NA	NA	NA	NA
ISOVF in the anterior limb of the right internal capsule	IDP.2068	AS	9	0.02	AU	1.35	1.19	1.54	7.06e-06	1.36	1.18	1.57	2.06e-05	1.36	1.14	1.61	0.000482	1.38	0.99	1.93	0.06	1.95	0.82	4.6	0.11	NA	NA	NA	NA
MD in the right superior corona radiata	IDP.1626	CES	29	3.65e-05	AU	1.39	1.2	1.6	1e-05	1.38	1.18	1.62	6.68e-05	1.33	1.08	1.64	0.00747	1.33	0.97	1.84	0.08	1.33	0.79	2.22	0.27	NA	NA	NA	NA
ISOVF in the left superior corona radiata	IDP.2077	AIS	11	0.02	AU	1.35	1.18	1.55	1.12e-05	1.35	1.18	1.53	7.41e-06	1.31	1.09	1.56	0.00303	1.23	0.92	1.66	0.15	1.09	0.46	2.6	0.82	NA	NA	NA	NA
MD in the left superior fronto-occipital fasciculus	IDP.1645	SVS	9	9.39e-05	AU	2.29	1.58	3.32	1.32e-05	2.34	1.56	3.51	3.69e-05	2.23	1.44	3.44	0.000299	3.26	1.12	9.44	0.03	2.95	0.29	30.25	0.31	NA	NA	NA	NA
MD in the right anterior thalamic radiation	IDP.1797	CES	13	4.21e-05	AU	1.51	1.25	1.83	2.62e-05	1.55	1.26	1.9	3.11e-05	1.59	1.21	2.08	0.000914	1.58	1.07	2.34	0.03	1.55	0.78	3.06	0.19	NA	NA	NA	NA
FA in the anterior limb of the right internal capsule	IDP.1468	AS	14	0.03	AU	0.81	0.73	0.9	5.3e-05	0.81	0.72	0.9	0.000102	0.86	0.75	0.99	0.04	0.91	0.7	1.18	0.46	0.73	0.45	1.18	0.18	NA	NA	NA	NA
MD in the left superior fronto-occipital fasciculus	IDP.1645	AIS	10	9.39e-05	AU	1.3	1.14	1.47	5.75e-05	1.3	1.14	1.47	6.01e-05	1.32	1.12	1.54	0.000791	1.31	0.98	1.74	0.07	1.18	0.51	2.76	0.66	NA	NA	NA	NA
ISOVF in the anterior limb of the right internal capsule	IDP.2068	SVS	10	0.02	AU	1.99	1.42	2.78	6.33e-05	1.98	1.36	2.88	0.000377	1.57	1.02	2.42	0.04	1.4	0.59	3.29	0.4	2.42	0.21	28.17	0.43	NA	NA	NA	NA
FA in the anterior limb of the left internal capsule	IDP.1469	AS	11	0.03	AU	0.81	0.73	0.9	7.93e-05	0.8	0.72	0.9	0.000151	0.85	0.74	0.98	0.02	0.89	0.68	1.16	0.34	0.64	0.39	1.07	0.08	NA	NA	NA	NA
MD in the right posterior corona radiata	IDP.1628	CES	14	5.89e-05	AU	1.47	1.21	1.78	9.23e-05	1.51	1.25	1.83	2.05e-05	1.58	1.22	2.05	0.000458	1.66	1.19	2.32	0.00593	1.53	0.75	3.1	0.22	NA	NA	NA	NA
Volume of the white matter hyperintensities	IDP.0179	AS	10	2966.87	mm3	1.24	1.11	1.38	0.000134	1.24	1.1	1.4	0.000376	1.33	1.14	1.54	0.000184	1.36	1.06	1.76	0.02	1.45	0.87	2.43	0.14	NA	NA	NA	NA
FA in the anterior limb of the right internal capsule	IDP.1468	AIS	15	0.03	AU	0.79	0.7	0.89	0.000166	0.78	0.68	0.89	0.000178	0.79	0.67	0.92	0.00343	0.73	0.52	1.03	0.07	0.72	0.4	1.3	0.26	NA	NA	NA	NA
FA in the anterior limb of the left internal capsule	IDP.1469	AIS	12	0.03	AU	0.78	0.69	0.89	0.000171	0.78	0.68	0.89	0.000312	0.84	0.72	0.99	0.04	0.9	0.67	1.22	0.46	0.72	0.4	1.33	0.26	NA	NA	NA	NA
ISOVF in the anterior limb of the left internal capsule	IDP.2069	AIS	9	0.02	AU	1.38	1.16	1.63	0.000185	1.4	1.17	1.68	0.000269	1.35	1.09	1.68	0.00601	1.71	1.07	2.74	0.03	2.65	1	7.01	0.05	NA	NA	NA	NA
ISOVF in the right posterior thalamic radiation	IDP.2080	CES	10	0.02	AU	1.52	1.21	1.91	0.000297	1.55	1.22	1.97	0.000346	1.68	1.23	2.28	0.000977	1.81	1.05	3.13	0.04	1.02	0.31	3.35	0.97	NA	NA	NA	NA
MD in the right external capsule	IDP.1634	AIS	10	3.74e-05	AU	1.25	1.11	1.42	0.000318	1.25	1.1	1.43	0.000746	1.13	0.97	1.3	0.11	1.1	0.9	1.34	0.32	0.94	0.62	1.44	0.75	NA	NA	NA	NA
MD in the right posterior corona radiata	IDP.1628	AS	15	5.89e-05	AU	1.18	1.08	1.29	0.000382	1.19	1.07	1.31	0.000807	1.15	1.02	1.29	0.02	1.06	0.9	1.26	0.45	0.95	0.7	1.29	0.71	NA	NA	NA	NA
MD in the right external capsule	IDP.1634	AS	9	3.74e-05	AU	1.21	1.09	1.34	0.000432	1.2	1.08	1.34	0.000707	1.12	0.98	1.29	0.1	1.12	0.91	1.37	0.25	1.03	0.67	1.58	0.89	NA	NA	NA	NA
ISOVF in the right posterior corona radiata	IDP.2078	AIS	7	0.02	AU	1.26	1.11	1.44	0.000536	1.26	1.1	1.45	0.000925	1.31	1.11	1.55	0.00131	1.32	0.98	1.76	0.06	1.26	0.55	2.9	0.51	NA	NA	NA	NA
ICVF in the left posterior corona radiata	IDP.1929	CES	26	0.05	AU	0.8	0.7	0.91	0.00066	0.79	0.69	0.9	0.000676	0.68	0.56	0.82	7.29e-05	0.67	0.52	0.87	0.00357	0.61	0.42	0.88	0.01	NA	NA	NA	NA
MD in the left anterior thalamic radiation	IDP.1796	CES	13	4.23e-05	AU	1.45	1.17	1.81	0.00087	1.45	1.14	1.83	0.00209	1.63	1.25	2.13	0.00035	1.71	1.11	2.64	0.02	1.83	0.84	3.98	0.12	NA	NA	NA	NA
MD in the right posterior corona radiata	IDP.1628	AIS	15	5.89e-05	AU	1.16	1.06	1.27	0.000893	1.17	1.06	1.29	0.00236	1.1	0.97	1.25	0.13	1.05	0.86	1.27	0.63	0.94	0.68	1.3	0.68	NA	NA	NA	NA
MD in the right anterior thalamic radiation	IDP.1797	AS	11	4.21e-05	AU	1.19	1.07	1.32	0.000896	1.2	1.07	1.34	0.00206	1.13	0.98	1.31	0.09	1.09	0.89	1.34	0.37	1.04	0.72	1.51	0.8	NA	NA	NA	NA
Volume of the right pars orbitalis	IDP.0394	AIS	2	3.65e-05	AU	0.66	0.51	0.85	0.00127	0.66	0.5	0.87	0.00288	NA	NA	NA	NA	NA	NA	NA	NA	NA	NA	NA	NA	NA	NA	NA	NA
MD in the right superior corona radiata	IDP.1626	AS	27	0.05	AU	1.11	1.04	1.19	0.0017	1.1	1.03	1.18	0.00618	1.04	0.94	1.15	0.41	1.01	0.88	1.16	0.89	1	0.79	1.26	0.99	NA	NA	NA	NA
ICVF in the right posterior corona radiata	IDP.1928	CES	25	0.02	AU	0.79	0.68	0.92	0.00205	0.78	0.66	0.93	0.0049	0.75	0.61	0.93	0.00931	0.67	0.51	0.88	0.00515	0.64	0.41	1	0.05	NA	NA	NA	NA
ISOVF in the right superior corona radiata	IDP.2076	CES	6	3.72e-05	AU	1.55	1.17	2.04	0.00225	1.55	1.16	2.07	0.00337	1.52	1.07	2.14	0.02	1.54	0.83	2.85	0.14	1.47	0.15	14.8	0.67	NA	NA	NA	NA
MD in the left superior corona radiata	IDP.1627	AS	23	0.03	AU	1.12	1.04	1.2	0.00232	1.12	1.03	1.21	0.0067	1.08	0.97	1.19	0.16	1.03	0.87	1.21	0.74	1	0.77	1.29	1	NA	NA	NA	NA
FA in the right posterior thalamic radiation	IDP.1480	AS	14	0.02	AU	0.87	0.79	0.95	0.00283	0.87	0.78	0.96	0.00663	0.92	0.81	1.05	0.21	0.95	0.8	1.14	0.57	0.99	0.73	1.35	0.97	NA	NA	NA	NA
FA in the left anterior thalamic radiation	IDP.1502	AS	10	4.23e-05	AU	0.85	0.76	0.95	0.00316	0.84	0.75	0.95	0.00387	0.91	0.78	1.07	0.25	0.95	0.77	1.18	0.62	0.75	0.5	1.12	0.13	NA	NA	NA	NA
MD in the left anterior thalamic radiation	IDP.1796	AS	13	0.02	AU	1.17	1.05	1.29	0.00347	1.16	1.04	1.3	0.00831	1.07	0.95	1.22	0.27	1.04	0.88	1.24	0.59	1.03	0.72	1.48	0.86	NA	NA	NA	NA
FA in the right anterior thalamic radiation	IDP.1503	AS	14	0.02	AU	0.87	0.79	0.96	0.00424	0.87	0.79	0.96	0.0055	0.88	0.76	1	0.06	0.89	0.72	1.09	0.24	0.7	0.51	0.96	0.03	NA	NA	NA	NA
OD in the right posterior corona radiata	IDP.2003	AS	9	4.21e-05	AU	0.83	0.72	0.94	0.00435	0.82	0.72	0.95	0.00588	0.84	0.7	0.99	0.04	0.83	0.62	1.11	0.17	0.73	0.3	1.74	0.41	NA	NA	NA	NA
MD in the right anterior thalamic radiation	IDP.1797	AIS	11	3.68e-05	AU	1.2	1.06	1.35	0.0044	1.19	1.05	1.36	0.00774	1.1	0.94	1.28	0.23	1.09	0.86	1.37	0.44	1.08	0.68	1.69	0.72	NA	NA	NA	NA
MD in the retrolenticular part of the right internal capsule	IDP.1622	AS	17	2966.87	mm3	1.12	1.04	1.22	0.00477	1.12	1.03	1.22	0.00681	1.11	0.99	1.26	0.08	1.12	0.96	1.3	0.13	1.1	0.86	1.41	0.43	NA	NA	NA	NA
Volume of the white matter hyperintensities	IDP.0179	AIS	9	3.75e-05	AU	1.2	1.05	1.36	0.00574	1.19	1.05	1.35	0.00731	1.2	1.03	1.41	0.02	1.2	0.94	1.52	0.12	1.12	0.6	2.07	0.68	NA	NA	NA	NA
MD in the left inferior longitudinal fasciculus	IDP.1808	SVS	18	0.02	AU	0.78	0.65	0.93	0.00701	0.78	0.64	0.94	0.00939	0.9	0.69	1.16	0.4	0.9	0.65	1.24	0.5	1.13	0.67	1.91	0.64	NA	NA	NA	NA
OD in the right posterior corona radiata	IDP.2003	AIS	9	0.02	AU	0.82	0.71	0.95	0.00705	0.82	0.71	0.95	0.00921	0.83	0.7	0.99	0.04	0.84	0.64	1.11	0.19	0.9	0.34	2.36	0.8	NA	NA	NA	NA
ISOVF in the right superior corona radiata	IDP.2076	AS	7	3.68e-05	AU	1.24	1.06	1.44	0.0072	1.24	1.05	1.47	0.01	1.18	0.99	1.4	0.07	1.03	0.7	1.51	0.86	0.73	0.21	2.56	0.55	NA	NA	NA	NA
MD in the retrolenticular part of the right internal capsule	IDP.1622	AIS	17	0.02	AU	1.13	1.03	1.23	0.00765	1.13	1.03	1.24	0.00984	1.1	0.97	1.25	0.14	1.11	0.94	1.31	0.22	1.06	0.81	1.39	0.66	NA	NA	NA	NA
FA in the right inferior longitudinal fasciculus	IDP.1515	AS	19	5.29e-05	AU	0.91	0.84	0.97	0.0082	0.9	0.84	0.98	0.01	0.91	0.82	1	0.06	0.93	0.81	1.06	0.27	0.9	0.72	1.13	0.35	NA	NA	NA	NA
MD in the left posterior thalamic radiation	IDP.1631	AS	21	0.02	AU	1.1	1.03	1.19	0.00824	1.11	1.03	1.2	0.00913	1.07	0.96	1.19	0.2	1.06	0.92	1.23	0.39	1.07	0.84	1.36	0.58	NA	NA	NA	NA
ISOVF in the left superior corona radiata	IDP.2077	SVS	9	3.65e-05	AU	1.53	1.11	2.1	0.00903	1.51	1.08	2.11	0.02	1.56	1.01	2.39	0.04	1.13	0.49	2.57	0.75	0.49	0.06	3.97	0.45	NA	NA	NA	NA
MD in the right superior corona radiata	IDP.1626	AIS	27	0.02	AU	1.1	1.02	1.18	0.01	1.1	1.02	1.19	0.01	1.04	0.94	1.16	0.41	1.01	0.84	1.2	0.94	0.95	0.74	1.22	0.67	NA	NA	NA	NA
ISOVF in the anterior limb of the right internal capsule	IDP.2068	AIS	11	0.04	AU	1.22	1.05	1.42	0.01	1.19	1.03	1.39	0.02	1.13	0.94	1.37	0.19	1.05	0.74	1.48	0.78	1.33	0.47	3.76	0.54	NA	NA	NA	NA
ICVF in the right superior corona radiata	IDP.1926	AS	28	0.02	AU	0.93	0.87	0.98	0.01	0.93	0.87	0.99	0.02	0.93	0.85	1.02	0.11	0.92	0.82	1.04	0.18	0.89	0.75	1.07	0.2	NA	NA	NA	NA
ISOVF in the left posterior thalamic radiation	IDP.2081	AS	9	3.37e-05	AU	1.18	1.04	1.34	0.01	1.18	1.04	1.35	0.01	1.1	0.94	1.29	0.22	1.05	0.72	1.53	0.78	1.53	0.74	3.14	0.21	NA	NA	NA	NA
MD in the fornix	IDP.1606	SVS	16	229.47	mm2	0.76	0.62	0.94	0.01	0.77	0.61	0.96	0.02	0.9	0.66	1.23	0.52	0.93	0.6	1.46	0.75	1.27	0.61	2.63	0.5	NA	NA	NA	NA
Cortical surface area of the left pars opercularis	IDP.0665	CES	5	5.39e-05	AU	0.65	0.47	0.91	0.01	0.65	0.46	0.92	0.02	0.65	0.43	0.99	0.04	0.61	0.28	1.31	0.15	1	0.25	3.94	0.99	NA	NA	NA	NA
MD in the left posterior corona radiata	IDP.1629	AS	20	0.03	AU	1.1	1.02	1.19	0.01	1.1	1.01	1.19	0.02	1.06	0.95	1.18	0.3	1.04	0.89	1.22	0.61	1.07	0.83	1.39	0.57	NA	NA	NA	NA
FA in the left posterior corona radiata	IDP.1479	CES	8	2966.87	mm3	0.72	0.56	0.94	0.01	0.69	0.53	0.9	0.00633	0.64	0.46	0.89	0.00789	0.59	0.35	0.99	0.05	0.35	0.1	1.16	0.08	NA	NA	NA	NA
Volume of the white matter hyperintensities	IDP.0179	SVS	9	4.33e-05	AU	1.34	1.06	1.7	0.01	1.35	1.05	1.72	0.02	1.37	1.01	1.84	0.04	1.32	0.84	2.08	0.19	1.7	0.7	4.11	0.2	NA	NA	NA	NA
MD in the right anterior corona radiata	IDP.1624	AIS	21	0.04	AU	1.1	1.02	1.18	0.01	1.1	1.02	1.19	0.02	1.07	0.96	1.19	0.22	1.06	0.92	1.21	0.4	1.03	0.83	1.27	0.81	NA	NA	NA	NA
FA in the left posterior thalamic radiation	IDP.1481	AS	12	0.04	AU	0.89	0.8	0.98	0.02	0.88	0.79	0.97	0.01	0.91	0.79	1.04	0.18	0.88	0.73	1.07	0.18	0.79	0.56	1.11	0.15	NA	NA	NA	NA
FA in the left posterior thalamic radiation	IDP.1481	AIS	11	3.84e-05	AU	0.87	0.78	0.97	0.02	0.87	0.77	0.97	0.02	0.92	0.79	1.07	0.3	0.93	0.75	1.13	0.42	0.83	0.57	1.23	0.31	NA	NA	NA	NA
MD in the left external capsule	IDP.1635	AS	10	0.02	AU	1.13	1.02	1.24	0.02	1.12	1.01	1.24	0.03	1.07	0.93	1.23	0.34	1.04	0.84	1.28	0.68	1.06	0.69	1.63	0.75	NA	NA	NA	NA
ISOVF in the right superior corona radiata	IDP.2076	AIS	6	0.04	AU	1.26	1.04	1.52	0.02	1.26	1.04	1.54	0.02	1.3	1.05	1.6	0.02	1.25	0.89	1.77	0.16	0.66	0.12	3.61	0.54	NA	NA	NA	NA
ICVF in the left superior corona radiata	IDP.1927	CES	23	3.27e-05	AU	0.84	0.73	0.97	0.02	0.84	0.72	0.98	0.02	0.76	0.62	0.93	0.00882	0.68	0.52	0.88	0.00615	0.53	0.36	0.79	0.00357	NA	NA	NA	NA
MD in the left superior longitudinal fasciculus	IDP.1643	SVS	33	0.03	AU	0.83	0.71	0.97	0.02	0.82	0.68	0.98	0.03	0.91	0.72	1.15	0.44	0.9	0.64	1.28	0.56	1.01	0.61	1.69	0.96	NA	NA	NA	NA
FA in the right superior corona radiata	IDP.1476	AS	10	3.47e-05	AU	0.88	0.78	0.98	0.02	0.87	0.78	0.98	0.02	0.87	0.75	1	0.06	0.98	0.75	1.28	0.85	1.07	0.67	1.72	0.74	NA	NA	NA	NA
MD in the right superior longitudinal fasciculus	IDP.1642	SVS	29	0.02	AU	0.83	0.71	0.97	0.02	0.82	0.69	0.98	0.03	0.91	0.72	1.14	0.4	0.91	0.62	1.32	0.6	1.04	0.63	1.71	0.89	NA	NA	NA	NA
ISOVF in the right posterior thalamic radiation	IDP.2080	AIS	8	3.27e-05	AU	1.17	1.02	1.34	0.02	1.17	1.01	1.36	0.04	1.08	0.9	1.3	0.39	1.04	0.79	1.36	0.77	0.73	0.37	1.41	0.28	NA	NA	NA	NA
MD in the right superior thalamic radiation	IDP.1818	AIS	12	5.29e-05	AU	1.16	1.02	1.32	0.02	1.14	1	1.3	0.04	1.05	0.9	1.22	0.52	1.04	0.84	1.28	0.71	0.91	0.58	1.42	0.63	NA	NA	NA	NA
MD in the left posterior thalamic radiation	IDP.1631	AIS	21	0.02	AU	1.1	1.01	1.19	0.02	1.1	1.01	1.19	0.03	1.05	0.93	1.19	0.43	1.05	0.9	1.23	0.52	1	0.77	1.31	0.99	NA	NA	NA	NA
OD in the left posterior corona radiata	IDP.2004	AS	6	5.39e-05	AU	0.84	0.73	0.98	0.03	0.84	0.72	0.98	0.03	0.86	0.71	1.04	0.11	0.77	0.52	1.15	0.16	0.87	0.22	3.44	0.79	NA	NA	NA	NA
MD in the left posterior corona radiata	IDP.1629	AIS	21	3.72e-05	AU	1.09	1.01	1.19	0.03	1.09	1	1.19	0.04	1.06	0.94	1.18	0.35	1.03	0.87	1.21	0.74	1.04	0.79	1.38	0.74	NA	NA	NA	NA
MD in the left superior corona radiata	IDP.1627	AIS	22	0.07	AU	1.09	1.01	1.18	0.03	1.1	1.01	1.19	0.03	1.03	0.92	1.16	0.62	1	0.85	1.18	0.99	0.89	0.67	1.19	0.42	NA	NA	NA	NA
MO in the right cingulum cingulate gyrus part	IDP.1561	SVS	7	0.01	AU	0.69	0.49	0.96	0.03	0.68	0.48	0.97	0.03	0.66	0.42	1.03	0.07	0.65	0.29	1.45	0.24	0.46	0.04	6	0.47	NA	NA	NA	NA
ISOVF in the left external capsule	IDP.2085	AIS	8	0.02	AU	0.88	0.78	0.99	0.03	0.87	0.77	0.99	0.03	0.88	0.75	1.03	0.12	0.89	0.71	1.12	0.27	0.72	0.43	1.21	0.18	NA	NA	NA	NA
FA in the left inferior longitudinal fasciculus	IDP.1514	SVS	17	4.33e-05	AU	1.22	1.02	1.47	0.03	1.22	1.01	1.48	0.04	1.07	0.84	1.38	0.57	1.11	0.79	1.54	0.53	0.92	0.52	1.6	0.74	NA	NA	NA	NA
MD in the right anterior corona radiata	IDP.1624	AS	20	4.87e-05	AU	1.08	1.01	1.16	0.03	1.08	1	1.16	0.04	1.07	0.97	1.19	0.18	1.06	0.94	1.2	0.34	1.06	0.87	1.29	0.55	NA	NA	NA	NA
MD in the right posterior thalamic radiation	IDP.1630	AS	18	2.95e-05	AU	1.09	1.01	1.17	0.04	1.09	1	1.18	0.06	1.07	0.95	1.19	0.26	1.06	0.92	1.23	0.41	1.06	0.85	1.32	0.6	NA	NA	NA	NA
MD in the left cingulum cingulate gyrus part	IDP.1637	SVS	17	4.23e-05	AU	0.83	0.69	0.99	0.04	0.83	0.69	0.99	0.04	0.92	0.72	1.18	0.5	0.91	0.66	1.26	0.55	1.19	0.72	1.96	0.48	NA	NA	NA	NA
MD in the left anterior thalamic radiation	IDP.1796	AIS	12	4.33e-05	AU	1.12	1.01	1.24	0.04	1.11	0.99	1.23	0.08	1.04	0.9	1.2	0.59	1.02	0.83	1.26	0.81	0.99	0.68	1.43	0.94	NA	NA	NA	NA
MD in the right anterior corona radiata	IDP.1624	CES	20	0.03	AU	1.17	1.01	1.36	0.04	1.15	0.98	1.36	0.09	1.28	1.03	1.6	0.02	1.48	1.11	1.97	0.00971	1.62	1.07	2.45	0.03	NA	NA	NA	NA
FA in the left superior corona radiata	IDP.1477	AS	13	0.02	AU	0.9	0.81	1	0.04	0.9	0.8	1	0.05	0.91	0.8	1.05	0.19	0.9	0.72	1.13	0.34	0.89	0.6	1.33	0.54	NA	NA	NA	NA
OD in the left posterior corona radiata	IDP.2004	AIS	5	3.84e-05	AU	0.83	0.7	0.99	0.04	0.83	0.69	1	0.05	0.86	0.69	1.08	0.19	0.88	0.57	1.36	0.46	1.07	0.11	10.91	0.93	NA	NA	NA	NA
MD in the left external capsule	IDP.1635	AIS	11	4.48e-05	AU	1.11	1	1.24	0.04	1.1	0.99	1.23	0.07	1.05	0.91	1.21	0.53	1.04	0.85	1.28	0.67	0.82	0.54	1.25	0.32	NA	NA	NA	NA
MD in the left anterior corona radiata	IDP.1625	AIS	22	3.83e-05	AU	1.08	1	1.16	0.05	1.09	1.01	1.17	0.03	1.07	0.96	1.2	0.2	1.07	0.93	1.23	0.31	1.06	0.86	1.31	0.54	NA	NA	NA	NA
MD in the right inferior fronto-occipital fasciculus	IDP.1807	SVS	18	0.02	AU	0.83	0.69	1	0.05	0.82	0.67	1	0.05	0.9	0.69	1.18	0.46	0.92	0.66	1.28	0.61	1.1	0.65	1.85	0.7	NA	NA	NA	NA
ISOVF in the left posterior corona radiata	IDP.2079	AS	11	0.04	AU	1.14	1	1.3	0.05	1.11	0.96	1.29	0.14	1.13	0.96	1.33	0.14	1.36	0.99	1.87	0.06	0.96	0.4	2.29	0.92	NA	NA	NA	NA
MO in the left cerebral peduncle	IDP.1542	SVS	9	0.02	AU	0.74	0.54	1	0.05	0.72	0.52	1	0.05	0.7	0.46	1.08	0.11	0.72	0.33	1.54	0.34	0.4	0.1	1.61	0.16	NA	NA	NA	NA
ISOVF in the right sagittal stratum	IDP.2082	AS	12	3.85e-05	AU	0.92	0.84	1	0.06	0.92	0.83	1.01	0.07	0.94	0.83	1.05	0.27	0.92	0.77	1.1	0.32	0.85	0.57	1.25	0.36	NA	NA	NA	NA
MD in the left inferior fronto-occipital fasciculus	IDP.1806	SVS	21	0.1	AU	0.85	0.71	1.01	0.06	0.83	0.69	1.01	0.06	0.93	0.72	1.2	0.56	0.91	0.66	1.26	0.57	0.92	0.57	1.48	0.71	NA	NA	NA	NA
MO in the right fornix and stria terminalis	IDP.1565	SVS	6	3.33e-05	AU	1.53	0.99	2.39	0.06	1.48	0.97	2.26	0.07	1.42	0.86	2.33	0.17	1.39	0.54	3.57	0.41	0.44	0.01	14.58	0.55	NA	NA	NA	NA
MD in the retrolenticular part of the left internal capsule	IDP.1623	AS	17	4.33e-05	AU	1.08	1	1.18	0.06	1.08	0.99	1.18	0.07	1.09	0.97	1.22	0.16	1.08	0.91	1.29	0.34	1.09	0.83	1.44	0.51	NA	NA	NA	NA
MD in the right anterior corona radiata	IDP.1624	SVS	20	0.02	AU	1.18	0.99	1.41	0.06	1.18	0.98	1.41	0.08	1	0.77	1.3	0.99	0.96	0.67	1.36	0.8	0.84	0.51	1.39	0.48	NA	NA	NA	NA
ISOVF in the left posterior corona radiata	IDP.2079	AIS	11	0.04	AU	1.13	0.99	1.27	0.06	1.12	0.99	1.27	0.06	1.2	1.02	1.41	0.03	1.27	0.96	1.7	0.09	0.96	0.42	2.18	0.91	NA	NA	NA	NA
FA in the right superior fronto-occipital fasciculus	IDP.1494	AS	8	87.86	mm2	0.89	0.78	1.01	0.06	0.88	0.77	1	0.06	0.86	0.73	1.01	0.07	0.85	0.63	1.13	0.22	0.76	0.25	2.33	0.58	NA	NA	NA	NA
Cortical surface area of the left pars orbitalis	IDP.0666	CES	7	0.02	AU	0.75	0.56	1.01	0.06	0.75	0.55	1.03	0.07	0.72	0.5	1.03	0.07	0.7	0.35	1.4	0.26	1.44	0.04	49.5	0.8	NA	NA	NA	NA
ISOVF in the left cerebral peduncle	IDP.2067	AS	2	0.02	AU	0.79	0.62	1.01	0.06	0.79	0.61	1.02	0.08	NA	NA	NA	NA	NA	NA	NA	NA	NA	NA	NA	NA	NA	NA	NA	NA
FA in the forceps minor	IDP.1511	SVS	22	0.02	AU	1.17	0.99	1.39	0.06	1.17	0.98	1.4	0.08	1.09	0.86	1.38	0.48	1.11	0.78	1.57	0.56	0.89	0.51	1.57	0.68	NA	NA	NA	NA
ISOVF in the right posterior thalamic radiation	IDP.2080	AS	9	448.62	mm3	1.17	0.99	1.38	0.07	1.16	0.97	1.38	0.11	1.06	0.89	1.27	0.49	1	0.76	1.32	1	0.83	0.39	1.77	0.58	NA	NA	NA	NA
Volume of the right caudate	IDP.0014	AS	26	3.84e-05	AU	0.93	0.87	1.01	0.07	0.93	0.86	1.01	0.07	0.94	0.85	1.04	0.24	0.94	0.77	1.14	0.49	0.84	0.61	1.16	0.29	NA	NA	NA	NA
MD in the left external capsule	IDP.1635	SVS	9	0.03	AU	1.48	0.97	2.25	0.07	1.45	0.93	2.28	0.1	1.03	0.67	1.57	0.89	1	0.57	1.79	0.99	0.26	0.03	1.87	0.15	NA	NA	NA	NA
FA in the left posterior corona radiata	IDP.1479	SVS	7	3.47e-05	AU	1.35	0.98	1.87	0.07	1.36	0.97	1.92	0.07	1.19	0.78	1.8	0.41	1.15	0.6	2.2	0.62	1.03	0.17	6.22	0.97	NA	NA	NA	NA
MD in the right superior longitudinal fasciculus	IDP.1642	AIS	28	0.02	AU	1.07	0.99	1.14	0.07	1.07	1	1.15	0.06	1.04	0.94	1.15	0.48	1.04	0.88	1.22	0.63	0.98	0.79	1.22	0.87	NA	NA	NA	NA
ISOVF in the right anterior thalamic radiation	IDP.2103	AIS	11	448.62	mm3	1.12	0.99	1.27	0.07	1.11	0.98	1.27	0.11	1.08	0.91	1.27	0.37	1.04	0.78	1.39	0.74	0.71	0.41	1.2	0.17	NA	NA	NA	NA
Volume of the right caudate	IDP.0014	AIS	25	4.87e-05	AU	0.93	0.85	1.01	0.07	0.93	0.86	1.02	0.12	0.95	0.85	1.07	0.42	0.98	0.79	1.22	0.88	0.77	0.54	1.1	0.14	NA	NA	NA	NA
MD in the right posterior thalamic radiation	IDP.1630	AIS	18	0.02	AU	1.08	0.99	1.17	0.07	1.08	0.98	1.19	0.13	1.05	0.93	1.19	0.44	1.04	0.87	1.23	0.66	1	0.79	1.27	1	NA	NA	NA	NA
ISOVF in the right anterior thalamic radiation	IDP.2103	AS	11	0.01	AU	1.12	0.99	1.26	0.08	1.1	0.97	1.26	0.14	1.08	0.92	1.27	0.34	1.05	0.77	1.43	0.73	0.72	0.44	1.17	0.16	NA	NA	NA	NA
ISOVF in the left superior thalamic radiation	IDP.2123	AIS	12	0.03	AU	0.91	0.82	1.01	0.08	0.9	0.81	1.01	0.06	0.87	0.76	1	0.06	0.87	0.71	1.08	0.18	0.71	0.4	1.26	0.22	NA	NA	NA	NA
FA in the left posterior corona radiata	IDP.1479	AS	6	0.02	AU	0.89	0.78	1.01	0.08	0.89	0.77	1.02	0.09	0.91	0.78	1.07	0.27	0.91	0.7	1.2	0.43	0.95	0.47	1.92	0.86	NA	NA	NA	NA
ISOVF in the right sagittal stratum	IDP.2082	AIS	13	0.14	mm	0.92	0.84	1.01	0.08	0.92	0.84	1.02	0.11	0.95	0.84	1.08	0.46	0.97	0.79	1.18	0.71	0.88	0.58	1.33	0.51	NA	NA	NA	NA
Thickness of the left fusiform gyrus	IDP.1026	AIS	4	0.02	AU	0.82	0.66	1.03	0.08	0.82	0.65	1.04	0.1	0.77	0.59	1	0.05	0.74	0.42	1.3	0.19	0.86	0.1	7.48	0.79	NA	NA	NA	NA
OD in the right external capsule	IDP.2009	AS	17	4.11e-05	AU	0.93	0.85	1.01	0.08	0.93	0.84	1.01	0.09	0.93	0.83	1.04	0.22	0.89	0.73	1.09	0.24	1.09	0.7	1.69	0.69	NA	NA	NA	NA
MD in the left sagittal stratum	IDP.1633	AS	21	3.33e-05	AU	1.06	0.99	1.13	0.09	1.06	0.99	1.14	0.1	1.04	0.94	1.16	0.4	1.05	0.91	1.2	0.5	1.15	0.96	1.38	0.13	NA	NA	NA	NA
MD in the retrolenticular part of the left internal capsule	IDP.1623	AIS	17	0.01	AU	1.08	0.99	1.18	0.09	1.08	0.98	1.19	0.1	1.04	0.92	1.18	0.53	1.07	0.89	1.28	0.45	1.07	0.79	1.45	0.63	NA	NA	NA	NA
OD in the right anterior thalamic radiation	IDP.2028	AS	7	120.3	mm2	0.88	0.76	1.02	0.09	0.88	0.74	1.04	0.14	0.98	0.79	1.21	0.84	1.01	0.66	1.54	0.95	1.88	0.47	7.44	0.29	NA	NA	NA	NA
Cortical surface area of the right banks superior temporal sulcus	IDP.0683	CES	3	0.07	AU	1.49	0.93	2.38	0.1	1.49	0.91	2.44	0.11	1.6	0.89	2.88	0.12	1.72	0.4	7.45	0.25	0.09	0	7.31244e+18	0.62	NA	NA	NA	NA
ICVF in the left superior fronto-occipital fasciculus	IDP.1945	AS	15	4.48e-05	AU	0.93	0.85	1.01	0.1	0.93	0.85	1.02	0.13	0.94	0.83	1.07	0.34	0.94	0.79	1.12	0.47	0.94	0.63	1.38	0.73	NA	NA	NA	NA
MD in the left anterior corona radiata	IDP.1625	AS	21	0.02	AU	1.06	0.99	1.14	0.1	1.07	0.99	1.15	0.07	1.08	0.97	1.2	0.14	1.08	0.95	1.22	0.23	1.11	0.91	1.34	0.29	NA	NA	NA	NA
ISOVF in the left posterior corona radiata	IDP.2079	SVS	12	0.02	AU	1.23	0.96	1.59	0.1	1.25	0.96	1.63	0.1	1.17	0.83	1.65	0.38	1.17	0.66	2.1	0.55	2.86	0.65	12.46	0.14	NA	NA	NA	NA
ISOVF in the left acoustic radiation	IDP.2100	AIS	6	0.02	AU	0.89	0.77	1.03	0.1	0.89	0.76	1.03	0.12	0.87	0.73	1.04	0.13	0.84	0.63	1.13	0.2	0.73	0.24	2.23	0.48	NA	NA	NA	NA
ISOVF in the left cerebral peduncle	IDP.2067	AIS	2	0.03	AU	0.8	0.61	1.05	0.11	0.8	0.61	1.06	0.12	NA	NA	NA	NA	NA	NA	NA	NA	NA	NA	NA	NA	NA	NA	NA	NA
FA in the anterior limb of the left internal capsule	IDP.1469	SVS	7	0.04	AU	0.7	0.45	1.09	0.11	0.7	0.46	1.08	0.11	0.81	0.49	1.35	0.43	1.07	0.3	3.81	0.9	0.25	0.02	3.08	0.22	NA	NA	NA	NA
ICVF in the left superior corona radiata	IDP.1927	AS	24	3.27e-05	AU	0.95	0.89	1.01	0.11	0.95	0.89	1.02	0.17	0.94	0.85	1.03	0.16	0.93	0.83	1.05	0.21	0.89	0.74	1.07	0.21	NA	NA	NA	NA
MD in the right superior thalamic radiation	IDP.1818	AS	12	0.03	AU	1.08	0.98	1.2	0.12	1.08	0.97	1.2	0.16	1.04	0.9	1.21	0.56	1.02	0.84	1.25	0.8	1.09	0.76	1.57	0.6	NA	NA	NA	NA
FA in the right inferior cerebellar peduncle	IDP.1462	AIS	9	0.02	AU	0.9	0.79	1.03	0.12	0.9	0.79	1.03	0.13	0.94	0.79	1.11	0.47	0.95	0.73	1.24	0.66	1.03	0.56	1.92	0.9	NA	NA	NA	NA
ISOVF in the right cingulum cingulate gyrus part	IDP.2086	AIS	11	3.73e-05	AU	0.92	0.82	1.02	0.12	0.91	0.81	1.02	0.1	0.92	0.8	1.07	0.3	0.92	0.73	1.16	0.46	1.14	0.55	2.36	0.68	NA	NA	NA	NA
MD in the forceps minor	IDP.1805	SVS	23	0.05	AU	0.88	0.75	1.03	0.12	0.88	0.74	1.04	0.13	0.93	0.73	1.17	0.53	0.97	0.69	1.35	0.84	1.06	0.65	1.74	0.8	NA	NA	NA	NA
ICVF in the right posterior corona radiata	IDP.1928	AS	24	0.07	AU	0.95	0.89	1.01	0.12	0.94	0.88	1.01	0.11	0.93	0.84	1.03	0.15	0.92	0.81	1.04	0.18	0.89	0.73	1.08	0.21	NA	NA	NA	NA
MO in the right cingulum cingulate gyrus part	IDP.1561	AIS	8	0.03	AU	1.12	0.97	1.28	0.13	1.11	0.96	1.28	0.18	1.03	0.86	1.24	0.76	1.01	0.76	1.34	0.94	0.75	0.28	2.01	0.5	NA	NA	NA	NA
ISOVF in the forceps major	IDP.2110	AIS	7	2.48e-05	AU	1.11	0.97	1.28	0.13	1.12	0.97	1.3	0.13	1.13	0.95	1.35	0.18	1.11	0.82	1.5	0.43	0.95	0.52	1.73	0.82	NA	NA	NA	NA
MD in the posterior limb of the right internal capsule	IDP.1620	AS	10	0.03	AU	1.08	0.98	1.2	0.13	1.08	0.97	1.2	0.15	1.08	0.94	1.23	0.27	1.05	0.83	1.31	0.66	1.35	0.82	2.22	0.2	NA	NA	NA	NA
FA in the right inferior cerebellar peduncle	IDP.1462	AS	9	0.05	AU	0.92	0.81	1.03	0.14	0.91	0.81	1.03	0.15	0.91	0.79	1.06	0.24	0.92	0.72	1.16	0.42	1.04	0.59	1.83	0.89	NA	NA	NA	NA
MO in the left cingulum cingulate gyrus part	IDP.1562	SVS	8	0.1	AU	0.77	0.55	1.09	0.14	0.77	0.54	1.1	0.15	0.69	0.44	1.06	0.09	0.66	0.3	1.44	0.25	0.57	0.02	15.97	0.69	NA	NA	NA	NA
MO in the right inferior cerebellar peduncle	IDP.1537	AS	2	0.02	AU	1.24	0.93	1.67	0.14	1.24	0.92	1.69	0.16	NA	NA	NA	NA	NA	NA	NA	NA	NA	NA	NA	NA	NA	NA	NA	NA
ISOVF in the right anterior thalamic radiation	IDP.2103	CES	11	3.47e-05	AU	1.2	0.94	1.52	0.15	1.2	0.93	1.54	0.16	1.12	0.81	1.55	0.48	1.02	0.58	1.8	0.93	0.67	0.2	2.24	0.47	NA	NA	NA	NA
MD in the right superior longitudinal fasciculus	IDP.1642	AS	27	3.63e-05	AU	1.05	0.98	1.12	0.15	1.05	0.98	1.13	0.14	1.03	0.93	1.13	0.6	1.02	0.89	1.18	0.76	1	0.82	1.22	0.98	NA	NA	NA	NA
MD in the right inferior longitudinal fasciculus	IDP.1809	AS	24	0.02	AU	1.05	0.98	1.12	0.15	1.05	0.98	1.13	0.17	1.04	0.94	1.15	0.47	1.03	0.91	1.18	0.61	1.06	0.86	1.32	0.57	NA	NA	NA	NA
ISOVF in the fornix	IDP.2056	CES	2	3.16e-05	AU	1.52	0.86	2.69	0.15	1.52	0.84	2.75	0.17	NA	NA	NA	NA	NA	NA	NA	NA	NA	NA	NA	NA	NA	NA	NA	NA
MD in the left superior thalamic radiation	IDP.1817	AS	9	0.02	AU	1.1	0.96	1.27	0.15	1.1	0.96	1.27	0.17	1.07	0.91	1.25	0.41	1.05	0.84	1.31	0.66	1.24	0.67	2.31	0.44	NA	NA	NA	NA
ISOVF in the right external capsule	IDP.2084	SVS	9	0.07	AU	1.21	0.93	1.56	0.15	1.18	0.9	1.54	0.23	1.21	0.87	1.69	0.27	1.05	0.64	1.72	0.82	0.79	0.26	2.4	0.63	NA	NA	NA	NA
ICVF in the right tapetum	IDP.1948	AS	18	4.21e-05	AU	0.94	0.86	1.02	0.15	0.93	0.86	1.02	0.12	0.93	0.82	1.05	0.23	0.92	0.78	1.08	0.29	1.16	0.87	1.54	0.3	NA	NA	NA	NA
MD in the right sagittal stratum	IDP.1632	AS	19	0.07	AU	1.05	0.98	1.13	0.16	1.05	0.98	1.14	0.16	1.05	0.94	1.16	0.37	1.05	0.92	1.2	0.45	1.05	0.86	1.28	0.64	NA	NA	NA	NA
ICVF in the left tapetum	IDP.1949	AS	9	0.01	AU	0.93	0.83	1.03	0.16	0.92	0.82	1.03	0.15	0.92	0.8	1.05	0.22	0.93	0.77	1.12	0.4	1.1	0.72	1.68	0.62	NA	NA	NA	NA
ISOVF in the left superior thalamic radiation	IDP.2123	AS	10	0.02	AU	0.93	0.84	1.03	0.16	0.93	0.83	1.03	0.17	0.91	0.8	1.04	0.18	0.88	0.71	1.1	0.24	0.83	0.47	1.46	0.46	NA	NA	NA	NA
FA in the posterior limb of the right internal capsule	IDP.1470	AS	21	396.11	mm3	0.95	0.88	1.02	0.16	0.95	0.87	1.02	0.16	0.94	0.85	1.04	0.24	0.93	0.78	1.11	0.41	0.78	0.53	1.13	0.17	NA	NA	NA	NA
Volume of the right pars orbitalis	IDP.0394	AS	3	0.02	AU	0.8	0.59	1.09	0.16	0.79	0.59	1.06	0.12	0.71	0.54	0.93	0.01	0.71	0.37	1.35	0.15	0.19	0	1346.46	0.25	NA	NA	NA	NA
FA in the left superior thalamic radiation	IDP.1523	AIS	16	1886.17	mm3	1.07	0.97	1.17	0.16	1.06	0.97	1.17	0.21	1.04	0.91	1.18	0.56	0.97	0.78	1.2	0.77	0.83	0.61	1.14	0.23	NA	NA	NA	NA
Volume of the left supramarginal gyrus	IDP.0373	SVS	5	0.02	AU	1.26	0.91	1.74	0.16	1.26	0.9	1.76	0.18	1.28	0.87	1.89	0.21	1.31	0.66	2.59	0.33	1.4	0.38	5.2	0.47	NA	NA	NA	NA
ISOVF in the anterior limb of the right internal capsule	IDP.2068	CES	11	0.02	AU	1.21	0.92	1.59	0.17	1.22	0.91	1.63	0.18	1.32	0.93	1.86	0.12	1.58	0.72	3.44	0.22	0.45	0.1	2	0.26	NA	NA	NA	NA
ISOVF in the forceps minor	IDP.2111	AIS	8	0.02	AU	1.09	0.96	1.23	0.18	1.09	0.95	1.25	0.22	1.04	0.89	1.22	0.62	0.98	0.73	1.3	0.85	0.67	0.31	1.48	0.26	NA	NA	NA	NA
FA in the right inferior longitudinal fasciculus	IDP.1515	SVS	17	0.13	mm	1.15	0.94	1.4	0.18	1.15	0.92	1.44	0.2	1.08	0.81	1.45	0.58	1.15	0.82	1.62	0.4	1.09	0.61	1.96	0.76	NA	NA	NA	NA
Thickness of the left lateral occipital cortex	IDP.1030	AIS	6	0.01	AU	1.12	0.95	1.33	0.19	1.12	0.94	1.35	0.2	1.11	0.9	1.37	0.32	1.31	0.81	2.14	0.21	1.43	0.14	14.88	0.69	NA	NA	NA	NA
ISOVF in the left external capsule	IDP.2085	AS	7	4.11e-05	AU	0.93	0.82	1.04	0.19	0.92	0.82	1.04	0.2	0.92	0.8	1.05	0.21	0.9	0.73	1.12	0.28	0.82	0.45	1.48	0.42	NA	NA	NA	NA
MD in the left sagittal stratum	IDP.1633	AIS	22	4.11e-05	AU	1.05	0.98	1.13	0.19	1.05	0.97	1.13	0.2	1.03	0.92	1.15	0.6	1.04	0.91	1.18	0.55	1.13	0.93	1.38	0.2	NA	NA	NA	NA
MD in the left sagittal stratum	IDP.1633	SVS	20	0.02	AU	0.89	0.75	1.06	0.2	0.88	0.74	1.06	0.18	0.9	0.7	1.16	0.41	0.9	0.65	1.24	0.49	0.94	0.59	1.49	0.77	NA	NA	NA	NA
FA in the forceps minor	IDP.1511	AS	21	0.02	AU	0.96	0.89	1.02	0.2	0.96	0.89	1.03	0.21	0.96	0.88	1.06	0.46	0.98	0.85	1.12	0.75	0.89	0.71	1.12	0.3	NA	NA	NA	NA
ISOVF in the left posterior thalamic radiation	IDP.2081	AIS	8	3.63e-05	AU	1.09	0.95	1.25	0.2	1.09	0.95	1.26	0.23	1.1	0.92	1.3	0.3	1.27	0.88	1.84	0.17	1.38	0.65	2.93	0.34	NA	NA	NA	NA
MD in the right inferior longitudinal fasciculus	IDP.1809	AIS	23	396.11	mm3	1.05	0.97	1.13	0.2	1.05	0.97	1.13	0.24	1.03	0.92	1.15	0.61	1.02	0.88	1.18	0.79	1	0.79	1.27	0.99	NA	NA	NA	NA
OD in the retrolenticular part of the left internal capsule	IDP.1998	AIS	6	0.01	AU	1.12	0.94	1.35	0.21	1.12	0.92	1.37	0.25	1.16	0.93	1.45	0.19	1.35	0.8	2.29	0.2	0.69	0.09	5.47	0.64	NA	NA	NA	NA
MO in the right cingulum cingulate gyrus part	IDP.1561	AS	7	0.07	AU	1.09	0.95	1.25	0.21	1.09	0.95	1.26	0.22	1.1	0.92	1.3	0.3	1.1	0.82	1.47	0.46	1.06	0.38	2.96	0.88	NA	NA	NA	NA
FA in the right cingulum hippocampus	IDP.1488	AIS	8	0.04	AU	1.09	0.95	1.26	0.21	1.1	0.95	1.27	0.22	1.07	0.89	1.28	0.47	1.03	0.76	1.39	0.84	0.89	0.44	1.83	0.71	NA	NA	NA	NA
MD in the left superior thalamic radiation	IDP.1817	AIS	9	3.16e-05	AU	1.1	0.95	1.27	0.21	1.1	0.94	1.28	0.23	1.06	0.9	1.24	0.51	1.05	0.83	1.34	0.65	1.2	0.61	2.37	0.54	NA	NA	NA	NA
FA in the body of corpus callosum	IDP.1455	SVS	12	0.03	AU	0.82	0.61	1.12	0.21	0.83	0.61	1.12	0.23	1	0.69	1.43	0.99	1.07	0.62	1.86	0.79	0.79	0.13	4.75	0.78	NA	NA	NA	NA
ISOVF in the right sagittal stratum	IDP.2082	CES	12	0.02	AU	0.89	0.73	1.07	0.21	0.91	0.75	1.11	0.36	0.97	0.74	1.27	0.81	0.97	0.6	1.57	0.9	0.64	0.26	1.6	0.3	NA	NA	NA	NA
MD in the fornix	IDP.1606	CES	16	3.37e-05	AU	0.89	0.73	1.07	0.22	0.85	0.7	1.04	0.12	0.83	0.64	1.08	0.16	0.8	0.5	1.28	0.32	0.64	0.24	1.67	0.33	NA	NA	NA	NA
Thickness of the left posterior-cingulate cortex	IDP.1042	CES	2	0.19	mm	1.48	0.8	2.73	0.22	1.48	0.77	2.82	0.24	NA	NA	NA	NA	NA	NA	NA	NA	NA	NA	NA	NA	NA	NA	NA	NA
MD in the retrolenticular part of the left internal capsule	IDP.1623	SVS	18	3.33e-05	AU	0.88	0.72	1.08	0.22	0.86	0.69	1.08	0.2	0.88	0.66	1.18	0.4	0.86	0.56	1.32	0.47	0.86	0.44	1.7	0.65	NA	NA	NA	NA
MD in the posterior limb of the right internal capsule	IDP.1620	SVS	9	2.48e-05	AU	0.84	0.64	1.11	0.22	0.84	0.64	1.12	0.24	0.89	0.63	1.25	0.49	0.9	0.53	1.54	0.66	1.2	0.33	4.36	0.75	NA	NA	NA	NA
ICVF in the left tapetum	IDP.1949	SVS	9	0.07	AU	1.18	0.9	1.53	0.23	1.18	0.89	1.55	0.24	1.12	0.79	1.59	0.53	1.13	0.72	1.78	0.54	1.05	0.36	3.06	0.91	NA	NA	NA	NA
MD in the left inferior fronto-occipital fasciculus	IDP.1806	AS	21	3.85e-05	AU	1.04	0.97	1.12	0.23	1.05	0.97	1.12	0.21	1.03	0.93	1.14	0.58	1.03	0.91	1.17	0.64	1.04	0.87	1.26	0.64	NA	NA	NA	NA
ICVF in the left posterior thalamic radiation	IDP.1931	SVS	24	0.04	AU	1.1	0.94	1.28	0.23	1.1	0.93	1.31	0.26	1.08	0.86	1.35	0.52	1.12	0.85	1.46	0.41	0.99	0.64	1.54	0.97	NA	NA	NA	NA
ISOVF in the right anterior corona radiata	IDP.2074	AS	12	0.01	AU	0.94	0.86	1.04	0.24	0.93	0.84	1.03	0.15	0.99	0.87	1.12	0.83	0.96	0.76	1.21	0.7	0.98	0.57	1.68	0.94	NA	NA	NA	NA
MD in the right inferior longitudinal fasciculus	IDP.1809	SVS	21	3.63e-05	AU	0.9	0.75	1.07	0.24	0.89	0.74	1.08	0.24	0.92	0.71	1.21	0.56	0.92	0.65	1.31	0.63	0.91	0.52	1.58	0.72	NA	NA	NA	NA
OD in the right cerebral peduncle	IDP.1991	SVS	11	0.01	AU	1.16	0.9	1.49	0.24	1.17	0.89	1.53	0.27	1.05	0.74	1.49	0.8	0.98	0.55	1.73	0.92	1.02	0.42	2.47	0.96	NA	NA	NA	NA
FA in the right cerebral peduncle	IDP.1466	AS	8	0.02	AU	0.93	0.82	1.05	0.24	0.93	0.82	1.06	0.28	0.93	0.79	1.08	0.34	0.95	0.72	1.24	0.65	0.91	0.45	1.84	0.75	NA	NA	NA	NA
ISOVF in the right anterior thalamic radiation	IDP.2103	SVS	11	0.02	AU	1.18	0.89	1.55	0.25	1.18	0.88	1.58	0.26	1.21	0.83	1.76	0.32	1.36	0.68	2.71	0.34	0.74	0.22	2.5	0.59	NA	NA	NA	NA
ISOVF in the right cingulum cingulate gyrus part	IDP.2086	AS	11	0.02	AU	0.94	0.85	1.04	0.25	0.94	0.85	1.04	0.25	0.96	0.84	1.1	0.58	0.98	0.78	1.23	0.84	1.2	0.62	2.35	0.54	NA	NA	NA	NA
FA in the left superior corona radiata	IDP.1477	AIS	14	0.03	AU	0.94	0.84	1.05	0.25	0.94	0.84	1.05	0.29	0.93	0.8	1.07	0.29	0.9	0.71	1.14	0.36	0.9	0.59	1.38	0.62	NA	NA	NA	NA
FA in the posterior limb of the left internal capsule	IDP.1471	AS	16	0.02	AU	0.95	0.88	1.04	0.25	0.95	0.87	1.04	0.26	0.95	0.85	1.06	0.34	0.95	0.78	1.16	0.59	0.79	0.5	1.27	0.31	NA	NA	NA	NA
Thickness of the left fusiform gyrus	IDP.1026	AS	5	0.14	mm	0.9	0.74	1.08	0.26	0.89	0.72	1.09	0.25	0.85	0.68	1.07	0.18	0.83	0.5	1.37	0.36	0.52	0.16	1.67	0.17	NA	NA	NA	NA
FA in the left inferior cerebellar peduncle	IDP.1463	AIS	6	0.03	AU	0.91	0.78	1.07	0.26	0.91	0.77	1.08	0.27	0.92	0.75	1.13	0.45	0.95	0.68	1.34	0.72	1.2	0.48	2.99	0.61	NA	NA	NA	NA
MD in the left superior longitudinal fasciculus	IDP.1643	AS	31	3.27e-05	AU	1.04	0.97	1.1	0.26	1.04	0.97	1.11	0.24	1.01	0.92	1.1	0.86	1	0.87	1.16	0.98	1.01	0.82	1.23	0.96	NA	NA	NA	NA
MD in the forceps minor	IDP.1805	AS	21	3.73e-05	AU	1.04	0.97	1.11	0.26	1.04	0.97	1.11	0.27	1.03	0.93	1.13	0.6	1.03	0.9	1.17	0.68	1.06	0.87	1.3	0.53	NA	NA	NA	NA
FA in the right medial lemniscus	IDP.1460	AS	6	0.03	AU	0.92	0.79	1.07	0.27	0.92	0.79	1.07	0.28	0.84	0.69	1.03	0.1	0.82	0.58	1.16	0.21	1.01	0.25	4.16	0.98	NA	NA	NA	NA
MD in the left superior longitudinal fasciculus	IDP.1643	AIS	33	3.27e-05	AU	1.04	0.97	1.12	0.27	1.05	0.97	1.13	0.21	1.04	0.94	1.15	0.49	1.02	0.87	1.2	0.77	1.01	0.8	1.28	0.93	NA	NA	NA	NA
MD in the genu of corpus callosum	IDP.1604	SVS	15	4.87e-05	AU	1.12	0.91	1.39	0.28	1.12	0.9	1.39	0.32	0.97	0.72	1.3	0.85	0.94	0.6	1.47	0.77	0.58	0.27	1.23	0.14	NA	NA	NA	NA
OD in the left cingulum hippocampus	IDP.2014	AIS	2	0.03	AU	0.84	0.62	1.15	0.28	0.84	0.61	1.16	0.29	NA	NA	NA	NA	NA	NA	NA	NA	NA	NA	NA	NA	NA	NA	NA	NA
ICVF in the left posterior corona radiata	IDP.1929	AS	25	0.05	AU	0.97	0.91	1.03	0.28	0.96	0.9	1.03	0.26	0.96	0.87	1.05	0.37	0.95	0.84	1.06	0.33	0.91	0.76	1.09	0.29	NA	NA	NA	NA
OD in the left inferior fronto-occipital fasciculus	IDP.2037	CES	8	0.01	AU	1.16	0.88	1.54	0.29	1.17	0.87	1.56	0.3	1.15	0.81	1.63	0.43	1.21	0.65	2.26	0.49	0.64	0.06	7.33	0.67	NA	NA	NA	NA
Thickness of the right precentral gyrus	IDP.1077	CES	7	0.2	mm	1.2	0.86	1.68	0.29	1.2	0.85	1.71	0.3	1.22	0.8	1.85	0.35	1.27	0.62	2.59	0.44	1.37	0.19	9.91	0.7	NA	NA	NA	NA
ISOVF in the right superior longitudinal fasciculus	IDP.2092	AS	14	0.02	AU	0.96	0.89	1.04	0.29	0.95	0.88	1.03	0.25	0.92	0.83	1.02	0.12	0.89	0.74	1.06	0.18	0.88	0.64	1.21	0.41	NA	NA	NA	NA
MD in the right sagittal stratum	IDP.1632	SVS	19	4.21e-05	AU	0.91	0.76	1.09	0.3	0.9	0.74	1.09	0.29	0.91	0.7	1.18	0.48	0.87	0.62	1.22	0.41	0.8	0.49	1.3	0.35	NA	NA	NA	NA
ISOVF in the retrolenticular part of the left internal capsule	IDP.2073	AS	4	0.02	AU	0.92	0.77	1.08	0.3	0.91	0.77	1.09	0.31	0.9	0.74	1.08	0.25	0.89	0.59	1.33	0.43	0.62	0.05	8.46	0.51	NA	NA	NA	NA
ISOVF in the left superior longitudinal fasciculus	IDP.2093	AS	17	0.01	AU	0.96	0.88	1.04	0.31	0.95	0.87	1.04	0.25	0.96	0.86	1.08	0.51	0.95	0.79	1.15	0.59	0.94	0.69	1.3	0.71	NA	NA	NA	NA
FA in the left cingulum hippocampus	IDP.1489	AIS	6	0.04	AU	1.09	0.93	1.28	0.31	1.07	0.9	1.28	0.45	0.98	0.8	1.2	0.85	0.97	0.67	1.39	0.81	0.47	0.16	1.41	0.13	NA	NA	NA	NA
ISOVF in the anterior limb of the left internal capsule	IDP.2069	CES	10	0.02	AU	1.16	0.87	1.55	0.31	1.15	0.84	1.58	0.39	1.22	0.85	1.73	0.28	1.34	0.67	2.69	0.37	0.54	0.11	2.78	0.42	NA	NA	NA	NA
ISOVF in the fornix	IDP.2056	AS	2	0.02	AU	1.15	0.87	1.53	0.32	1.16	0.86	1.55	0.33	NA	NA	NA	NA	NA	NA	NA	NA	NA	NA	NA	NA	NA	NA	NA	NA
MD in the fornix	IDP.1606	AIS	15	3.37e-05	AU	0.95	0.87	1.05	0.32	0.96	0.87	1.06	0.4	1.03	0.91	1.18	0.62	1.03	0.87	1.23	0.71	1.08	0.79	1.48	0.59	NA	NA	NA	NA
FA in the right anterior corona radiata	IDP.1474	SVS	14	0.03	AU	1.14	0.88	1.48	0.32	1.18	0.9	1.54	0.24	1.26	0.89	1.79	0.19	1.32	0.79	2.2	0.26	1.08	0.35	3.34	0.89	NA	NA	NA	NA
MD in the body of corpus callosum	IDP.1605	SVS	13	4.09e-05	AU	1.14	0.88	1.47	0.33	1.15	0.88	1.49	0.31	1.05	0.73	1.5	0.79	1.06	0.69	1.62	0.78	1.1	0.47	2.57	0.82	NA	NA	NA	NA
OD in the right external capsule	IDP.2009	AIS	17	0.02	AU	0.95	0.87	1.05	0.33	0.96	0.87	1.06	0.39	0.96	0.85	1.09	0.56	0.98	0.8	1.21	0.84	1.27	0.79	2.05	0.3	NA	NA	NA	NA
FA in the right anterior corona radiata	IDP.1474	AS	18	0.03	AU	0.96	0.87	1.05	0.33	0.96	0.87	1.05	0.38	0.99	0.88	1.13	0.93	1	0.8	1.24	0.97	0.73	0.49	1.09	0.11	NA	NA	NA	NA
ISOVF in the left inferior fronto-occipital fasciculus	IDP.2112	SVS	14	0.01	AU	1.1	0.91	1.33	0.33	1.1	0.9	1.34	0.34	1.1	0.85	1.42	0.49	1	0.68	1.46	1	0.72	0.36	1.43	0.31	NA	NA	NA	NA
ISOVF in the left superior thalamic radiation	IDP.2123	SVS	13	0.01	AU	0.89	0.7	1.13	0.33	0.88	0.69	1.13	0.32	0.85	0.63	1.14	0.28	0.81	0.49	1.34	0.38	0.6	0.18	2.05	0.38	NA	NA	NA	NA
MD in the posterior limb of the left internal capsule	IDP.1621	AS	10	2.42e-05	AU	1.05	0.95	1.17	0.34	1.05	0.95	1.17	0.35	1.07	0.93	1.22	0.33	1.08	0.87	1.34	0.43	1.12	0.6	2.08	0.69	NA	NA	NA	NA
OD in the right medial lemniscus	IDP.1985	SVS	4	0.02	AU	1.26	0.78	2.05	0.34	1.27	0.76	2.12	0.36	1.1	0.63	1.93	0.74	0.94	0.22	3.95	0.9	11.04	0	1.28009e+10	0.67	NA	NA	NA	NA
ICVF in the genu of corpus callosum	IDP.1904	SVS	27	0.04	AU	0.94	0.82	1.07	0.35	0.95	0.82	1.09	0.45	1.04	0.85	1.27	0.69	1.05	0.83	1.34	0.66	1.34	0.95	1.9	0.09	NA	NA	NA	NA
ISOVF in the right superior corona radiata	IDP.2076	SVS	6	0.02	AU	1.17	0.84	1.63	0.35	1.17	0.83	1.66	0.36	1.12	0.73	1.74	0.6	0.89	0.41	1.94	0.72	0.19	0.01	4.08	0.21	NA	NA	NA	NA
MD in the posterior limb of the right internal capsule	IDP.1620	AIS	10	2.48e-05	AU	1.05	0.94	1.18	0.35	1.06	0.95	1.19	0.31	1.06	0.92	1.23	0.4	1.12	0.86	1.45	0.36	1.25	0.73	2.15	0.36	NA	NA	NA	NA
ISOVF in the left acoustic radiation	IDP.2100	AS	6	0.02	AU	0.94	0.82	1.07	0.35	0.94	0.82	1.08	0.37	0.89	0.75	1.05	0.17	0.88	0.66	1.16	0.28	0.79	0.29	2.17	0.55	NA	NA	NA	NA
FA in the left inferior cerebellar peduncle	IDP.1463	AS	7	0.03	AU	0.94	0.81	1.08	0.35	0.93	0.81	1.08	0.36	0.92	0.77	1.09	0.35	0.92	0.69	1.22	0.48	1.19	0.56	2.53	0.59	NA	NA	NA	NA
ICVF in the left superior fronto-occipital fasciculus	IDP.1945	SVS	11	0.07	AU	0.89	0.7	1.14	0.35	0.91	0.7	1.17	0.46	0.98	0.7	1.38	0.92	1.06	0.57	1.97	0.84	0.94	0.35	2.55	0.89	NA	NA	NA	NA
ICVF in the right tapetum	IDP.1948	AIS	18	0.07	AU	0.96	0.88	1.05	0.35	0.96	0.87	1.05	0.34	0.94	0.82	1.07	0.32	0.93	0.77	1.12	0.4	1.16	0.85	1.58	0.32	NA	NA	NA	NA
FA in the left external capsule	IDP.1485	AS	15	0.03	AU	0.96	0.88	1.05	0.36	0.97	0.89	1.07	0.55	0.99	0.87	1.12	0.82	0.99	0.8	1.24	0.96	0.85	0.62	1.16	0.28	NA	NA	NA	NA
MD in the left anterior thalamic radiation	IDP.1796	SVS	9	4.23e-05	AU	1.13	0.87	1.46	0.36	1.11	0.85	1.45	0.45	0.9	0.65	1.25	0.55	0.89	0.53	1.49	0.61	0.77	0.32	1.86	0.51	NA	NA	NA	NA
MD in the right cerebral peduncle	IDP.1616	CES	4	3.19e-05	AU	1.2	0.81	1.79	0.36	1.17	0.79	1.72	0.43	0.97	0.61	1.54	0.9	0.96	0.4	2.32	0.9	0.98	0.03	35.49	0.98	NA	NA	NA	NA
MD in the right sagittal stratum	IDP.1632	AIS	20	4.21e-05	AU	1.04	0.96	1.12	0.37	1.04	0.96	1.12	0.36	1.03	0.92	1.15	0.6	1.04	0.9	1.2	0.62	0.99	0.8	1.21	0.9	NA	NA	NA	NA
ICVF in the right tapetum	IDP.1948	SVS	17	0.07	AU	1.11	0.89	1.39	0.37	1.14	0.88	1.47	0.32	1.1	0.81	1.51	0.54	1.13	0.76	1.7	0.53	1.21	0.54	2.72	0.62	NA	NA	NA	NA
ISOVF in the left cingulum cingulate gyrus part	IDP.2087	AIS	10	0.02	AU	0.94	0.83	1.07	0.37	0.94	0.82	1.08	0.39	0.95	0.81	1.12	0.56	0.95	0.74	1.21	0.62	0.67	0.27	1.64	0.33	NA	NA	NA	NA
ISOVF in the retrolenticular part of the right internal capsule	IDP.2072	SVS	3	0.02	AU	0.81	0.51	1.29	0.37	0.81	0.5	1.31	0.38	0.78	0.47	1.31	0.35	0.75	0.18	3.16	0.48	2.45	0	3.24605e+26	0.88	NA	NA	NA	NA
ICVF in the left sagittal stratum	IDP.1933	SVS	36	0.04	AU	1.06	0.94	1.2	0.37	1.07	0.93	1.22	0.36	1.07	0.88	1.3	0.51	1.11	0.85	1.46	0.43	1.17	0.83	1.65	0.36	NA	NA	NA	NA
MO in the left inferior cerebellar peduncle	IDP.1538	AIS	2	0.09	AU	1.15	0.85	1.55	0.37	1.15	0.84	1.56	0.39	NA	NA	NA	NA	NA	NA	NA	NA	NA	NA	NA	NA	NA	NA	NA	NA
FA in the right external capsule	IDP.1484	AS	12	0.02	AU	0.96	0.87	1.06	0.38	0.97	0.87	1.07	0.5	0.97	0.85	1.1	0.61	0.97	0.77	1.23	0.78	0.78	0.52	1.17	0.2	NA	NA	NA	NA
FA in the left inferior fronto-occipital fasciculus	IDP.1512	SVS	17	0.02	AU	1.09	0.9	1.32	0.38	1.09	0.88	1.36	0.42	1.08	0.81	1.43	0.62	1.13	0.79	1.63	0.48	1.13	0.64	2.01	0.65	NA	NA	NA	NA
MD in the right inferior fronto-occipital fasciculus	IDP.1807	AS	20	3.83e-05	AU	1.03	0.96	1.11	0.38	1.03	0.95	1.1	0.48	1.01	0.91	1.11	0.87	1	0.89	1.13	0.93	1.05	0.86	1.29	0.61	NA	NA	NA	NA
ICVF in the right posterior thalamic radiation	IDP.1930	SVS	28	0.04	AU	1.06	0.92	1.22	0.39	1.07	0.92	1.23	0.39	1.07	0.86	1.32	0.55	1.11	0.84	1.46	0.47	1.15	0.79	1.66	0.45	NA	NA	NA	NA
FA in the genu of corpus callosum	IDP.1454	SVS	12	0.04	AU	0.89	0.68	1.17	0.4	0.91	0.69	1.19	0.48	1.04	0.74	1.48	0.81	1.11	0.68	1.81	0.65	1.51	0.36	6.23	0.53	NA	NA	NA	NA
ISOVF in the retrolenticular part of the left internal capsule	IDP.2073	AIS	4	0.02	AU	0.93	0.77	1.11	0.4	0.92	0.77	1.12	0.41	0.9	0.71	1.12	0.34	0.87	0.57	1.34	0.39	0.42	0.02	7.17	0.32	NA	NA	NA	NA
ICVF in the left superior corona radiata	IDP.1927	SVS	26	0.04	AU	1.07	0.91	1.27	0.4	1.07	0.89	1.3	0.46	1.07	0.85	1.35	0.58	1.08	0.8	1.45	0.6	1.13	0.66	1.93	0.64	NA	NA	NA	NA
FA in the posterior limb of the right internal capsule	IDP.1470	SVS	23	0.02	AU	0.92	0.77	1.11	0.41	0.93	0.76	1.13	0.46	1	0.78	1.28	0.97	1.05	0.66	1.68	0.82	1.11	0.44	2.85	0.81	NA	NA	NA	NA
Cortical surface area of the left supramarginal gyrus	IDP.0678	SVS	8	624.36	mm2	1.14	0.84	1.55	0.41	1.19	0.88	1.63	0.26	1.23	0.83	1.81	0.3	1.26	0.72	2.19	0.36	1.34	0.45	3.99	0.53	NA	NA	NA	NA
ISOVF in the left inferior longitudinal fasciculus	IDP.2114	SVS	17	0.01	AU	1.08	0.9	1.29	0.42	1.07	0.89	1.29	0.46	1	0.78	1.27	0.97	0.97	0.7	1.35	0.84	0.67	0.35	1.31	0.23	NA	NA	NA	NA
ISOVF in the genu of corpus callosum	IDP.2054	AS	5	0.02	AU	1.09	0.88	1.35	0.42	1.07	0.9	1.28	0.45	0.98	0.79	1.22	0.84	0.93	0.62	1.4	0.64	1.6	0.46	5.59	0.32	NA	NA	NA	NA
FA in the right tapetum	IDP.1498	AIS	13	0.07	AU	0.96	0.86	1.06	0.42	0.95	0.86	1.06	0.4	0.93	0.8	1.08	0.36	0.83	0.61	1.14	0.22	0.87	0.57	1.33	0.49	NA	NA	NA	NA
Volume of the right precentral gyrus	IDP.0399	SVS	4	1711.83	mm3	0.89	0.66	1.2	0.44	0.88	0.67	1.17	0.39	0.88	0.69	1.13	0.32	0.88	0.57	1.36	0.42	0.85	0.28	2.54	0.58	NA	NA	NA	NA
ISOVF in the right external capsule	IDP.2084	AS	9	0.02	AU	1.05	0.93	1.17	0.44	1.03	0.93	1.15	0.58	0.97	0.85	1.11	0.65	0.96	0.78	1.17	0.64	0.8	0.5	1.27	0.29	NA	NA	NA	NA
Cortical surface area of the left precentral gyrus	IDP.0671	AIS	6	498.83	mm2	1.04	0.94	1.14	0.44	1.04	0.94	1.15	0.45	1.04	0.94	1.15	0.41	1.05	0.91	1.2	0.42	1.07	0.88	1.3	0.39	NA	NA	NA	NA
ISOVF in the right inferior longitudinal fasciculus	IDP.2115	AIS	25	0.01	AU	1.03	0.96	1.1	0.45	1.02	0.96	1.1	0.5	0.99	0.9	1.08	0.76	0.95	0.82	1.1	0.51	0.93	0.73	1.2	0.58	NA	NA	NA	NA
FA in the right tapetum	IDP.1498	AS	13	0.07	AU	0.96	0.88	1.06	0.45	0.97	0.87	1.07	0.5	0.96	0.84	1.1	0.53	0.84	0.64	1.12	0.22	0.85	0.57	1.26	0.37	NA	NA	NA	NA
ISOVF in the retrolenticular part of the right internal capsule	IDP.2072	AS	3	0.02	AU	0.93	0.77	1.13	0.46	0.93	0.76	1.13	0.47	0.9	0.71	1.14	0.37	0.89	0.49	1.62	0.49	0.26	0	1.10482e+10	0.61	NA	NA	NA	NA
OD in the right anterior thalamic radiation	IDP.2028	AIS	6	0.01	AU	0.94	0.78	1.12	0.46	0.96	0.8	1.16	0.69	1.04	0.83	1.29	0.73	1.05	0.68	1.61	0.79	1.53	0.2	11.95	0.59	NA	NA	NA	NA
ICVF in the left anterior corona radiata	IDP.1925	SVS	33	0.05	AU	1.06	0.91	1.22	0.46	1.06	0.9	1.25	0.48	1.09	0.87	1.37	0.44	1.07	0.81	1.41	0.62	1.3	0.87	1.94	0.19	NA	NA	NA	NA
Cortical surface area of the left fusiform gyrus	IDP.0654	CES	3	361.17	mm2	0.86	0.58	1.28	0.46	0.86	0.57	1.3	0.48	0.9	0.58	1.39	0.63	0.93	0.29	2.93	0.8	1.05	0	2958.75	0.95	NA	NA	NA	NA
MO in the left inferior cerebellar peduncle	IDP.1538	SVS	2	0.09	AU	1.29	0.65	2.58	0.47	1.29	0.63	2.65	0.48	NA	NA	NA	NA	NA	NA	NA	NA	NA	NA	NA	NA	NA	NA	NA	NA
OD in the right sagittal stratum	IDP.2007	AIS	3	0.01	AU	0.91	0.71	1.17	0.47	0.91	0.7	1.18	0.48	0.95	0.7	1.29	0.74	0.98	0.46	2.07	0.9	0.7	0	411.93	0.61	NA	NA	NA	NA
MD in the right acoustic radiation	IDP.1795	AS	7	4.15e-05	AU	0.96	0.84	1.08	0.48	0.96	0.84	1.1	0.55	1.01	0.86	1.19	0.91	1.05	0.84	1.31	0.64	1.41	0.77	2.6	0.2	NA	NA	NA	NA
MD in the left inferior fronto-occipital fasciculus	IDP.1806	AIS	21	3.85e-05	AU	1.03	0.95	1.11	0.48	1.03	0.95	1.11	0.52	1.02	0.91	1.14	0.73	1.02	0.89	1.17	0.77	1.01	0.82	1.23	0.95	NA	NA	NA	NA
ICVF in the right posterior corona radiata	IDP.1928	AIS	26	0.05	AU	0.98	0.91	1.05	0.48	0.97	0.9	1.04	0.42	0.94	0.84	1.04	0.23	0.93	0.8	1.07	0.3	0.9	0.73	1.1	0.29	NA	NA	NA	NA
MD in the posterior limb of the left internal capsule	IDP.1621	AIS	10	2.42e-05	AU	1.04	0.93	1.16	0.49	1.05	0.93	1.18	0.45	1.04	0.9	1.2	0.63	1.04	0.81	1.33	0.75	0.91	0.46	1.79	0.76	NA	NA	NA	NA
MD in the right tapetum	IDP.1648	AS	11	0.000141	AU	1.04	0.93	1.18	0.49	1.06	0.94	1.21	0.34	1	0.86	1.16	0.98	0.95	0.72	1.25	0.67	1.36	0.85	2.15	0.17	NA	NA	NA	NA
FA in the left superior thalamic radiation	IDP.1523	AS	16	0.02	AU	1.03	0.94	1.13	0.5	1.02	0.93	1.12	0.62	0.96	0.85	1.08	0.49	0.92	0.76	1.1	0.33	0.73	0.55	0.97	0.03	NA	NA	NA	NA
FA in the right cerebral peduncle	IDP.1466	SVS	8	0.02	AU	0.88	0.6	1.29	0.51	0.85	0.56	1.27	0.43	1.04	0.68	1.58	0.85	1.05	0.56	1.96	0.86	1.38	0.12	15.34	0.75	NA	NA	NA	NA
ISOVF in the left corticospinal tract	IDP.2059	CES	5	0.05	AU	0.9	0.65	1.24	0.51	0.9	0.64	1.25	0.52	1.01	0.68	1.52	0.94	1.04	0.5	2.16	0.88	0.91	0.04	21.72	0.93	NA	NA	NA	NA
MO in the right inferior cerebellar peduncle	IDP.1537	AIS	2	0.1	AU	1.11	0.82	1.5	0.51	1.11	0.81	1.51	0.53	NA	NA	NA	NA	NA	NA	NA	NA	NA	NA	NA	NA	NA	NA	NA	NA
FA in the left posterior thalamic radiation	IDP.1481	SVS	13	0.04	AU	1.08	0.85	1.38	0.52	1.1	0.86	1.42	0.45	1.09	0.79	1.52	0.6	1.11	0.71	1.74	0.63	0.96	0.42	2.23	0.92	NA	NA	NA	NA
MO in the left sagittal stratum	IDP.1558	AIS	2	0.08	AU	1.11	0.81	1.51	0.52	1.11	0.81	1.52	0.53	NA	NA	NA	NA	NA	NA	NA	NA	NA	NA	NA	NA	NA	NA	NA	NA
MD in the left posterior corona radiata	IDP.1629	SVS	19	5.39e-05	AU	0.93	0.76	1.15	0.52	0.92	0.74	1.14	0.45	0.9	0.68	1.21	0.49	0.83	0.57	1.21	0.31	0.82	0.42	1.61	0.54	NA	NA	NA	NA
Thickness of the right lateral occipital cortex	IDP.1064	CES	9	0.14	mm	0.92	0.7	1.19	0.52	0.92	0.69	1.21	0.53	0.96	0.69	1.35	0.82	1.09	0.55	2.14	0.78	0.74	0.17	3.14	0.64	NA	NA	NA	NA
ISOVF in the left anterior thalamic radiation	IDP.2102	SVS	9	0.02	AU	1.1	0.82	1.47	0.52	1.1	0.81	1.49	0.53	1.21	0.81	1.79	0.35	1.34	0.65	2.76	0.38	0.61	0.07	5.15	0.6	NA	NA	NA	NA
ISOVF in the retrolenticular part of the right internal capsule	IDP.2072	AIS	3	0.02	AU	0.93	0.76	1.15	0.53	0.93	0.75	1.16	0.54	0.87	0.67	1.12	0.28	0.86	0.43	1.7	0.43	0.07	0	2.60056e+10	0.43	NA	NA	NA	NA
MO in the left cingulum cingulate gyrus part	IDP.1562	AIS	8	0.05	AU	0.95	0.82	1.11	0.53	0.95	0.82	1.11	0.55	0.98	0.82	1.18	0.87	1	0.7	1.41	0.99	0.65	0.15	2.91	0.51	NA	NA	NA	NA
Cortical surface area of the left entorhinal cortex	IDP.0653	SVS	4	91.7	mm2	1.19	0.69	2.04	0.54	1.15	0.67	1.96	0.62	1.06	0.62	1.82	0.84	1.03	0.34	3.09	0.94	0.4	0	561.23	0.64	NA	NA	NA	NA
ISOVF in the fornix	IDP.2056	AIS	2	0.02	AU	1.1	0.81	1.48	0.54	1.1	0.81	1.49	0.55	NA	NA	NA	NA	NA	NA	NA	NA	NA	NA	NA	NA	NA	NA	NA	NA
FA in the right superior fronto-occipital fasciculus	IDP.1494	SVS	9	0.04	AU	1.1	0.82	1.47	0.54	1.08	0.8	1.47	0.62	1.01	0.7	1.47	0.95	0.99	0.53	1.86	0.99	0.31	0.03	3.62	0.3	NA	NA	NA	NA
OD in the right inferior cerebellar peduncle	IDP.1987	AIS	4	0.02	AU	1.07	0.86	1.33	0.54	1.07	0.85	1.34	0.55	1.02	0.79	1.33	0.86	1.01	0.6	1.73	0.94	0.81	0.1	6.44	0.71	NA	NA	NA	NA
ISOVF in the right acoustic radiation	IDP.2101	AIS	9	0.02	AU	0.96	0.85	1.09	0.55	0.96	0.84	1.1	0.56	0.94	0.8	1.1	0.43	0.88	0.66	1.18	0.35	0.83	0.43	1.61	0.53	NA	NA	NA	NA
FA in the left medial lemniscus	IDP.1461	SVS	6	0.03	AU	0.89	0.59	1.32	0.55	0.88	0.58	1.34	0.56	0.91	0.58	1.44	0.7	1	0.43	2.31	1	1.44	0.04	50.7	0.79	NA	NA	NA	NA
MO in the left inferior cerebellar peduncle	IDP.1538	AS	2	0.09	AU	1.09	0.82	1.43	0.56	1.09	0.82	1.44	0.57	NA	NA	NA	NA	NA	NA	NA	NA	NA	NA	NA	NA	NA	NA	NA	NA
MD in the left anterior corona radiata	IDP.1625	SVS	20	4.48e-05	AU	1.05	0.88	1.26	0.56	1.05	0.86	1.27	0.65	1	0.77	1.31	0.98	0.93	0.67	1.29	0.65	0.69	0.42	1.14	0.14	NA	NA	NA	NA
Cortical surface area of the right lateral orbital frontal cortex	IDP.0693	AS	5	308.76	mm2	0.95	0.78	1.14	0.57	0.92	0.77	1.1	0.36	0.87	0.72	1.07	0.19	0.85	0.61	1.19	0.25	0.52	0.1	2.75	0.3	NA	NA	NA	NA
MD in the left cerebral peduncle	IDP.1617	AS	4	3.07e-05	AU	1.05	0.89	1.24	0.57	1.05	0.88	1.25	0.58	1.05	0.86	1.28	0.66	0.99	0.64	1.51	0.92	1.63	0.16	16.26	0.46	NA	NA	NA	NA
ISOVF in the forceps minor	IDP.2111	AS	9	0.02	AU	1.03	0.92	1.15	0.58	1.03	0.91	1.17	0.63	0.98	0.84	1.14	0.76	0.94	0.7	1.25	0.63	0.9	0.48	1.7	0.7	NA	NA	NA	NA
MD in the genu of corpus callosum	IDP.1604	AS	16	4.87e-05	AU	1.02	0.94	1.11	0.58	1.02	0.94	1.11	0.61	1.02	0.92	1.15	0.67	1.02	0.87	1.2	0.79	1.12	0.83	1.51	0.44	NA	NA	NA	NA
MD in the left superior corona radiata	IDP.1627	SVS	20	3.72e-05	AU	0.95	0.78	1.15	0.59	0.92	0.75	1.14	0.47	0.86	0.65	1.15	0.31	0.84	0.56	1.25	0.36	0.82	0.41	1.67	0.57	NA	NA	NA	NA
MD in the right superior corona radiata	IDP.1626	SVS	25	3.65e-05	AU	0.95	0.8	1.14	0.6	0.94	0.79	1.13	0.54	0.91	0.71	1.16	0.45	0.9	0.62	1.32	0.58	0.82	0.46	1.47	0.48	NA	NA	NA	NA
ISOVF in the body of corpus callosum	IDP.2055	SVS	15	0.02	AU	0.94	0.73	1.2	0.6	0.94	0.72	1.22	0.63	1.12	0.8	1.57	0.52	1.17	0.64	2.14	0.58	0.83	0.14	5.09	0.83	NA	NA	NA	NA
FA in the left inferior cerebellar peduncle	IDP.1463	SVS	7	0.03	AU	0.91	0.63	1.31	0.61	0.93	0.64	1.34	0.69	0.97	0.61	1.53	0.89	1.17	0.53	2.61	0.65	1.17	0.13	10.26	0.86	NA	NA	NA	NA
MD in the left inferior longitudinal fasciculus	IDP.1808	AIS	21	3.75e-05	AU	0.98	0.91	1.06	0.62	0.99	0.91	1.07	0.73	1	0.9	1.12	0.97	1.02	0.89	1.17	0.72	1.08	0.87	1.35	0.45	NA	NA	NA	NA
MD in the left inferior longitudinal fasciculus	IDP.1808	AS	20	3.75e-05	AU	1.02	0.95	1.09	0.62	1.02	0.94	1.1	0.66	1.02	0.92	1.14	0.68	1.02	0.9	1.16	0.72	1.08	0.88	1.33	0.43	NA	NA	NA	NA
ISOVF in the right anterior corona radiata	IDP.2074	AIS	13	0.01	AU	1.03	0.92	1.14	0.62	1.02	0.9	1.15	0.8	1.03	0.9	1.19	0.65	1.07	0.8	1.43	0.62	0.65	0.35	1.21	0.16	NA	NA	NA	NA
MD in the right posterior thalamic radiation	IDP.1630	SVS	18	4.87e-05	AU	0.95	0.78	1.16	0.62	0.94	0.77	1.16	0.58	0.93	0.71	1.22	0.61	0.92	0.66	1.29	0.61	0.62	0.36	1.07	0.08	NA	NA	NA	NA
ICVF in the left posterior thalamic radiation	IDP.1931	AS	22	0.04	AU	0.98	0.92	1.05	0.62	0.98	0.91	1.05	0.56	0.96	0.87	1.05	0.35	0.93	0.83	1.05	0.22	0.86	0.72	1.02	0.08	NA	NA	NA	NA
ISOVF in the right superior longitudinal fasciculus	IDP.2092	SVS	17	0.02	AU	0.95	0.79	1.15	0.63	0.94	0.78	1.15	0.56	0.85	0.66	1.1	0.21	0.84	0.58	1.23	0.35	0.81	0.38	1.72	0.56	NA	NA	NA	NA
ISOVF in the retrolenticular part of the left internal capsule	IDP.2073	SVS	4	0.02	AU	0.9	0.6	1.36	0.63	0.9	0.59	1.38	0.64	0.87	0.54	1.4	0.56	0.86	0.34	2.15	0.63	1.48	0	952.01	0.82	NA	NA	NA	NA
ISOVF in the body of corpus callosum	IDP.2055	AIS	15	0.02	AU	1.03	0.91	1.16	0.63	1.04	0.91	1.18	0.6	1.01	0.87	1.18	0.88	1.03	0.77	1.39	0.81	1.36	0.56	3.3	0.46	NA	NA	NA	NA
ICVF in the right anterior corona radiata	IDP.1924	SVS	30	0.05	AU	0.96	0.83	1.12	0.63	0.97	0.82	1.15	0.72	1.01	0.81	1.27	0.9	1.03	0.78	1.35	0.85	1.22	0.81	1.84	0.32	NA	NA	NA	NA
ISOVF in the left anterior thalamic radiation	IDP.2102	CES	10	0.02	AU	1.06	0.82	1.38	0.63	1.07	0.8	1.43	0.64	1.06	0.76	1.47	0.74	1.09	0.63	1.88	0.74	0.88	0.13	5.91	0.88	NA	NA	NA	NA
OD in the left inferior cerebellar peduncle	IDP.1988	AIS	3	0.02	AU	0.94	0.74	1.2	0.64	0.94	0.75	1.19	0.61	1.01	0.77	1.32	0.94	1.04	0.54	2.01	0.81	1.22	0	473191	0.88	NA	NA	NA	NA
ISOVF in the left inferior fronto-occipital fasciculus	IDP.2112	AIS	14	0.01	AU	1.02	0.94	1.11	0.64	1.02	0.93	1.12	0.66	1	0.88	1.12	0.95	0.96	0.79	1.15	0.61	0.79	0.58	1.07	0.12	NA	NA	NA	NA
MD in the fornix	IDP.1606	AS	16	3.37e-05	AU	0.98	0.9	1.07	0.65	0.99	0.91	1.08	0.8	1.01	0.9	1.14	0.87	1.03	0.88	1.21	0.69	0.99	0.74	1.31	0.92	NA	NA	NA	NA
OD in the right cerebral peduncle	IDP.1991	AS	11	0.01	AU	0.98	0.88	1.08	0.65	0.97	0.87	1.08	0.62	1.03	0.9	1.18	0.67	1.05	0.82	1.34	0.68	0.94	0.66	1.34	0.72	NA	NA	NA	NA
MO in the right sagittal stratum	IDP.1557	AS	4	0.08	AU	0.96	0.79	1.15	0.65	0.96	0.79	1.16	0.66	0.93	0.74	1.18	0.57	0.93	0.55	1.59	0.7	0.6	0.09	4.13	0.38	NA	NA	NA	NA
ISOVF in the right inferior fronto-occipital fasciculus	IDP.2113	AS	17	0.01	AU	0.98	0.91	1.06	0.66	0.98	0.91	1.06	0.58	0.95	0.86	1.05	0.28	0.94	0.82	1.08	0.39	0.87	0.68	1.11	0.23	NA	NA	NA	NA
ISOVF in the left anterior corona radiata	IDP.2075	AS	10	0.02	AU	0.98	0.88	1.08	0.66	0.97	0.87	1.07	0.5	0.97	0.85	1.12	0.71	0.95	0.74	1.21	0.64	0.77	0.41	1.47	0.38	NA	NA	NA	NA
OD in the left sagittal stratum	IDP.2008	AIS	4	0.02	AU	0.93	0.67	1.29	0.67	0.88	0.66	1.17	0.37	0.88	0.67	1.16	0.38	0.86	0.48	1.56	0.48	0.36	0.01	10.22	0.32	NA	NA	NA	NA
MD in the left tapetum	IDP.1649	SVS	11	0.000139	AU	1.07	0.79	1.44	0.67	1.07	0.78	1.46	0.68	1.08	0.73	1.59	0.7	1.14	0.55	2.39	0.69	0.63	0.21	1.91	0.37	NA	NA	NA	NA
Volume of the right lateral orbital frontal cortex	IDP.0387	AIS	7	887.25	mm3	0.97	0.83	1.13	0.67	0.97	0.82	1.15	0.73	0.93	0.76	1.14	0.48	0.95	0.67	1.35	0.72	0.86	0.17	4.37	0.81	NA	NA	NA	NA
OD in the left medial lemniscus	IDP.1986	SVS	5	0.02	AU	0.88	0.47	1.63	0.67	0.9	0.48	1.69	0.75	0.94	0.5	1.79	0.85	0.97	0.27	3.55	0.95	1.59	0.02	106.12	0.75	NA	NA	NA	NA
MD in the right posterior corona radiata	IDP.1628	SVS	12	5.89e-05	AU	1.06	0.82	1.37	0.68	1.06	0.8	1.41	0.67	0.92	0.66	1.3	0.65	0.83	0.55	1.26	0.35	0.89	0.35	2.24	0.78	NA	NA	NA	NA
OD in the right inferior cerebellar peduncle	IDP.1987	SVS	4	0.02	AU	0.9	0.55	1.48	0.68	0.9	0.54	1.5	0.69	0.85	0.49	1.5	0.58	0.8	0.24	2.67	0.6	0.41	0	43.78	0.5	NA	NA	NA	NA
ISOVF in the right corticospinal tract	IDP.2058	AS	6	0.05	AU	0.97	0.84	1.12	0.69	0.97	0.84	1.13	0.7	1.02	0.85	1.21	0.86	1.07	0.76	1.5	0.66	2.38	0.27	20.58	0.33	NA	NA	NA	NA
ICVF in the right posterior thalamic radiation	IDP.1930	AS	29	0.04	AU	0.99	0.93	1.05	0.69	0.98	0.92	1.04	0.56	0.96	0.87	1.05	0.35	0.93	0.83	1.04	0.21	0.88	0.76	1.02	0.09	NA	NA	NA	NA
Cortical surface area of the right parahippocampal gyrus	IDP.0697	CES	4	75.67	mm2	0.91	0.57	1.46	0.69	0.94	0.61	1.44	0.77	1.03	0.65	1.63	0.9	1.12	0.45	2.84	0.71	0.86	0	48624	0.96	NA	NA	NA	NA
MD in the body of corpus callosum	IDP.1605	CES	12	4.09e-05	AU	0.95	0.74	1.22	0.69	0.95	0.73	1.23	0.7	0.95	0.68	1.32	0.76	0.8	0.44	1.49	0.45	1.72	0.46	6.43	0.38	NA	NA	NA	NA
Volume of the left hippocampus	IDP.0019	SVS	6	483.28	mm3	1.07	0.76	1.5	0.7	1.11	0.78	1.58	0.57	1.25	0.8	1.94	0.32	1.28	0.6	2.7	0.44	0.8	0.17	3.76	0.71	NA	NA	NA	NA
Thickness of the right lingual gyrus	IDP.1066	CES	4	0.15	mm	0.89	0.48	1.66	0.71	0.85	0.48	1.51	0.58	0.68	0.41	1.13	0.14	0.6	0.22	1.62	0.2	0.13	0	3.54945e+09	0.75	NA	NA	NA	NA
ISOVF in the left superior longitudinal fasciculus	IDP.2093	AIS	19	0.01	AU	0.98	0.9	1.08	0.71	0.99	0.89	1.09	0.79	0.99	0.88	1.13	0.93	0.97	0.79	1.19	0.74	1.02	0.7	1.49	0.9	NA	NA	NA	NA
FA in the right tapetum	IDP.1498	SVS	14	0.07	AU	0.96	0.75	1.21	0.71	0.96	0.75	1.22	0.72	0.91	0.67	1.25	0.57	0.85	0.51	1.42	0.51	0.85	0.33	2.17	0.71	NA	NA	NA	NA
MD in the right tapetum	IDP.1648	SVS	11	0.000141	AU	1.06	0.78	1.45	0.72	1.14	0.85	1.53	0.38	1.21	0.83	1.78	0.32	1.34	0.67	2.67	0.37	0.82	0.23	2.94	0.74	NA	NA	NA	NA
MD in the left cerebral peduncle	IDP.1617	AIS	4	3.07e-05	AU	1.03	0.86	1.24	0.72	1.03	0.86	1.25	0.72	1.03	0.83	1.26	0.81	1.01	0.65	1.59	0.94	1.68	0.14	20.7	0.47	NA	NA	NA	NA
OD in the right sagittal stratum	IDP.2007	AS	3	0.01	AU	0.96	0.76	1.21	0.72	0.96	0.75	1.22	0.73	0.91	0.7	1.18	0.47	0.89	0.43	1.87	0.58	1.02	0	333.61	0.97	NA	NA	NA	NA
MO in the anterior limb of the right internal capsule	IDP.1543	AS	10	0.05	AU	0.98	0.87	1.1	0.73	0.99	0.87	1.11	0.82	0.96	0.83	1.13	0.65	0.94	0.71	1.24	0.61	0.65	0.35	1.23	0.16	NA	NA	NA	NA
ISOVF in the left cingulum cingulate gyrus part	IDP.2087	AS	10	0.02	AU	0.98	0.87	1.11	0.74	0.98	0.86	1.11	0.74	1	0.86	1.17	0.99	1.01	0.79	1.29	0.91	0.95	0.41	2.17	0.88	NA	NA	NA	NA
ISOVF in the right superior thalamic radiation	IDP.2124	AS	10	0.01	AU	1.02	0.89	1.17	0.75	1.01	0.88	1.17	0.83	0.94	0.82	1.09	0.42	0.92	0.76	1.11	0.34	0.76	0.36	1.59	0.41	NA	NA	NA	NA
MD in the left cingulum cingulate gyrus part	IDP.1637	AIS	18	2.95e-05	AU	1.01	0.94	1.09	0.75	1.01	0.93	1.09	0.84	1.02	0.92	1.12	0.76	1	0.87	1.15	0.98	0.98	0.79	1.22	0.86	NA	NA	NA	NA
ISOVF in the right cerebral peduncle	IDP.2066	AS	3	0.02	AU	0.96	0.77	1.21	0.76	0.96	0.77	1.2	0.74	0.96	0.74	1.25	0.78	0.9	0.4	2.02	0.65	1.6	0	6.9848e+10	0.85	NA	NA	NA	NA
ISOVF in the right superior thalamic radiation	IDP.2124	AIS	10	0.01	AU	0.98	0.87	1.11	0.76	0.98	0.86	1.11	0.74	0.92	0.79	1.07	0.27	0.88	0.69	1.13	0.28	0.78	0.4	1.53	0.42	NA	NA	NA	NA
MD in the body of corpus callosum	IDP.1605	AIS	13	4.09e-05	AU	1.02	0.91	1.13	0.77	1.02	0.91	1.15	0.7	1.07	0.92	1.25	0.38	1.08	0.88	1.32	0.43	1.11	0.79	1.55	0.52	NA	NA	NA	NA
MO in the left cingulum cingulate gyrus part	IDP.1562	AS	7	0.05	AU	1.02	0.88	1.19	0.77	1.02	0.88	1.19	0.78	1.02	0.85	1.22	0.84	1.03	0.74	1.42	0.84	0.92	0.2	4.25	0.9	NA	NA	NA	NA
ISOVF in the body of corpus callosum	IDP.2055	CES	15	0.02	AU	1.03	0.84	1.27	0.78	1.02	0.82	1.26	0.89	0.97	0.73	1.29	0.84	0.92	0.52	1.64	0.77	1.96	0.42	9.17	0.36	NA	NA	NA	NA
Thickness of the left precuneus cortex	IDP.1044	AIS	8	0.15	mm	1.02	0.88	1.19	0.78	1.04	0.88	1.22	0.66	1.08	0.89	1.32	0.43	1.11	0.78	1.58	0.49	0.65	0.27	1.54	0.27	NA	NA	NA	NA
ISOVF in the left anterior thalamic radiation	IDP.2102	AS	8	0.02	AU	0.98	0.86	1.12	0.78	0.98	0.86	1.12	0.76	0.92	0.78	1.09	0.35	0.89	0.67	1.18	0.35	0.75	0.3	1.84	0.46	NA	NA	NA	NA
MD in the right tapetum	IDP.1648	AIS	12	0.000141	AU	1.02	0.9	1.16	0.79	1.03	0.91	1.16	0.68	1.02	0.87	1.21	0.77	1.01	0.74	1.38	0.93	1.06	0.64	1.76	0.8	NA	NA	NA	NA
Volume of the right hippocampus	IDP.0020	CES	7	496.49	mm3	1.05	0.75	1.47	0.79	1.05	0.74	1.49	0.79	1.04	0.67	1.62	0.85	1.05	0.49	2.25	0.89	0.5	0.08	3.24	0.39	NA	NA	NA	NA
ISOVF in the right superior longitudinal fasciculus	IDP.2092	AIS	15	0.02	AU	0.99	0.91	1.08	0.79	0.99	0.9	1.08	0.75	0.96	0.85	1.07	0.45	0.9	0.73	1.11	0.3	0.88	0.62	1.24	0.43	NA	NA	NA	NA
FA in the right anterior thalamic radiation	IDP.1503	SVS	14	0.02	AU	1.03	0.81	1.31	0.79	1.04	0.81	1.33	0.78	1.1	0.81	1.5	0.55	1.08	0.66	1.78	0.73	1.23	0.49	3.1	0.63	NA	NA	NA	NA
MD in the left superior thalamic radiation	IDP.1817	SVS	9	3.16e-05	AU	1.04	0.73	1.49	0.81	0.99	0.72	1.36	0.96	0.89	0.6	1.33	0.58	0.87	0.46	1.63	0.62	1.99	0.41	9.69	0.34	NA	NA	NA	NA
Thickness of the left rostral anterior cingulate cortex	IDP.1045	AS	3	0.23	mm	1.04	0.76	1.43	0.81	1.07	0.8	1.44	0.64	1.05	0.78	1.43	0.75	1.09	0.45	2.67	0.72	1.69	0.01	251.23	0.41	NA	NA	NA	NA
OD in the left inferior cerebellar peduncle	IDP.1988	AS	3	0.02	AU	0.97	0.75	1.25	0.81	0.96	0.75	1.23	0.75	0.95	0.74	1.23	0.7	0.91	0.43	1.92	0.65	0.76	0	866639	0.84	NA	NA	NA	NA
ICVF in the right superior corona radiata	IDP.1926	SVS	28	0.04	AU	0.98	0.84	1.15	0.82	0.98	0.82	1.17	0.81	0.98	0.78	1.24	0.89	0.96	0.71	1.3	0.79	0.91	0.56	1.49	0.7	NA	NA	NA	NA
Cortical surface area of the left banks superior temporal sulcus	IDP.0649	SVS	6	155.65	mm2	0.95	0.64	1.42	0.82	0.95	0.63	1.45	0.82	1.05	0.65	1.7	0.84	1.09	0.4	3.02	0.83	0.69	0.01	31.98	0.8	NA	NA	NA	NA
FA in the right posterior thalamic radiation	IDP.1480	SVS	14	0.03	AU	1.03	0.81	1.3	0.82	1.05	0.81	1.35	0.73	1.14	0.81	1.59	0.45	1.18	0.74	1.89	0.45	1.15	0.52	2.58	0.7	NA	NA	NA	NA
MD in the right anterior thalamic radiation	IDP.1797	SVS	7	4.21e-05	AU	1.04	0.72	1.5	0.82	1.04	0.72	1.52	0.83	0.9	0.58	1.41	0.66	0.88	0.41	1.89	0.69	0.78	0.06	10.36	0.81	NA	NA	NA	NA
ISOVF in the left anterior thalamic radiation	IDP.2102	AIS	9	0.02	AU	1.01	0.89	1.15	0.82	1.02	0.88	1.18	0.79	1.05	0.88	1.26	0.58	1.05	0.74	1.5	0.76	0.84	0.31	2.24	0.68	NA	NA	NA	NA
MD in the left acoustic radiation	IDP.1794	AS	5	4.12e-05	AU	1.02	0.88	1.17	0.82	1.02	0.88	1.17	0.83	1.05	0.88	1.24	0.6	1.09	0.79	1.48	0.51	1.15	0.48	2.76	0.65	NA	NA	NA	NA
ISOVF in the left inferior longitudinal fasciculus	IDP.2114	AS	18	0.01	AU	0.99	0.92	1.06	0.82	0.99	0.92	1.06	0.73	0.94	0.85	1.04	0.24	0.94	0.82	1.08	0.36	0.78	0.6	1.03	0.08	NA	NA	NA	NA
Cortical surface area of the right postcentral gyrus	IDP.0703	SVS	6	455.12	mm2	0.97	0.74	1.27	0.84	0.97	0.73	1.29	0.84	0.97	0.7	1.34	0.86	0.98	0.58	1.67	0.93	0.82	0.33	2.07	0.59	NA	NA	NA	NA
FA in the left anterior thalamic radiation	IDP.1502	SVS	9	0.02	AU	1.03	0.77	1.37	0.84	1.04	0.77	1.39	0.82	1.08	0.75	1.55	0.68	1.08	0.66	1.77	0.72	1.05	0.37	3	0.91	NA	NA	NA	NA
ISOVF in the left cerebral peduncle	IDP.2067	CES	2	0.02	AU	1.05	0.63	1.77	0.84	1.05	0.62	1.79	0.85	NA	NA	NA	NA	NA	NA	NA	NA	NA	NA	NA	NA	NA	NA	NA	NA
MD in the left acoustic radiation	IDP.1794	AIS	5	4.12e-05	AU	0.99	0.85	1.14	0.85	0.99	0.84	1.15	0.85	1.01	0.84	1.21	0.94	1.04	0.73	1.47	0.78	1.09	0.42	2.82	0.8	NA	NA	NA	NA
ISOVF in the right superior thalamic radiation	IDP.2124	SVS	11	0.01	AU	0.98	0.76	1.25	0.85	0.96	0.74	1.25	0.75	0.89	0.63	1.25	0.5	0.87	0.53	1.45	0.56	0.74	0.18	3.08	0.64	NA	NA	NA	NA
ISOVF in the left anterior corona radiata	IDP.2075	SVS	13	0.02	AU	0.98	0.78	1.23	0.85	0.98	0.77	1.23	0.84	0.88	0.65	1.18	0.39	0.82	0.49	1.38	0.42	1.18	0.37	3.77	0.76	NA	NA	NA	NA
ISOVF in the left superior longitudinal fasciculus	IDP.2093	SVS	19	0.01	AU	0.98	0.81	1.2	0.86	0.99	0.81	1.21	0.91	0.96	0.74	1.25	0.76	0.84	0.52	1.36	0.46	0.92	0.41	2.05	0.83	NA	NA	NA	NA
OD in the right inferior cerebellar peduncle	IDP.1987	AS	4	0.02	AU	1.02	0.83	1.25	0.86	1.02	0.83	1.25	0.86	1.04	0.82	1.31	0.77	1.07	0.67	1.69	0.69	0.76	0.11	5.09	0.59	NA	NA	NA	NA
MD in the left posterior thalamic radiation	IDP.1631	SVS	22	5.29e-05	AU	0.98	0.82	1.18	0.87	0.98	0.81	1.19	0.85	0.94	0.71	1.23	0.64	0.92	0.62	1.35	0.65	0.77	0.43	1.39	0.37	NA	NA	NA	NA
ISOVF in the left external capsule	IDP.2085	SVS	7	0.01	AU	0.98	0.74	1.3	0.87	0.98	0.73	1.31	0.87	0.92	0.65	1.29	0.62	0.92	0.55	1.53	0.71	0.65	0.15	2.8	0.49	NA	NA	NA	NA
ISOVF in the right acoustic radiation	IDP.2101	AS	9	0.02	AU	0.99	0.88	1.11	0.87	0.98	0.87	1.11	0.8	0.91	0.79	1.06	0.24	0.88	0.68	1.12	0.25	0.95	0.52	1.72	0.83	NA	NA	NA	NA
OD in the left inferior cerebellar peduncle	IDP.1988	SVS	3	0.02	AU	1.04	0.64	1.71	0.87	1.04	0.63	1.72	0.87	1.06	0.58	1.93	0.85	1.14	0.2	6.64	0.77	6.83	0	1.13684e+09	0.42	NA	NA	NA	NA
MD in the left cingulum cingulate gyrus part	IDP.1637	AS	17	2.95e-05	AU	1.01	0.94	1.08	0.87	1.01	0.94	1.08	0.87	1.01	0.92	1.11	0.84	1.01	0.88	1.15	0.88	1.04	0.85	1.28	0.67	NA	NA	NA	NA
FA in the left anterior corona radiata	IDP.1475	SVS	9	0.03	AU	0.97	0.7	1.36	0.87	0.97	0.69	1.38	0.88	1.08	0.7	1.66	0.72	1.07	0.5	2.25	0.85	1.72	0.29	10.07	0.49	NA	NA	NA	NA
FA in the anterior limb of the right internal capsule	IDP.1468	SVS	10	0.03	AU	0.98	0.72	1.33	0.88	0.98	0.71	1.36	0.92	1.1	0.73	1.66	0.66	1.16	0.59	2.25	0.63	1.14	0.18	7.18	0.88	NA	NA	NA	NA
MO in the anterior limb of the right internal capsule	IDP.1543	AIS	11	0.05	AU	0.99	0.87	1.13	0.89	1	0.87	1.14	0.98	1.01	0.86	1.2	0.87	1.16	0.84	1.59	0.33	0.82	0.39	1.71	0.55	NA	NA	NA	NA
Volume of the right hippocampus	IDP.0020	SVS	6	496.49	mm3	0.97	0.65	1.46	0.89	1.02	0.67	1.57	0.92	1.24	0.73	2.09	0.43	1.27	0.53	3.04	0.51	0.38	0.05	2.85	0.25	NA	NA	NA	NA
ISOVF in the right external capsule	IDP.2084	AIS	8	0.02	AU	1.01	0.89	1.15	0.89	1	0.88	1.13	0.97	0.95	0.81	1.11	0.5	0.93	0.75	1.15	0.44	0.65	0.38	1.09	0.09	NA	NA	NA	NA
FA in the right anterior corona radiata	IDP.1474	AIS	17	0.03	AU	0.99	0.9	1.1	0.89	1	0.89	1.12	0.98	1.01	0.88	1.17	0.85	1.03	0.79	1.35	0.8	1.03	0.64	1.64	0.9	NA	NA	NA	NA
ISOVF in the right inferior fronto-occipital fasciculus	IDP.2113	AIS	19	0.01	AU	1	0.93	1.08	0.91	1	0.92	1.08	0.99	0.98	0.88	1.09	0.73	0.96	0.82	1.12	0.57	0.81	0.62	1.05	0.11	NA	NA	NA	NA
Volume of the left caudate	IDP.0013	SVS	22	425.35	mm3	1.01	0.83	1.24	0.91	1.03	0.83	1.27	0.79	1.09	0.83	1.42	0.55	1.09	0.66	1.82	0.72	1.34	0.46	3.92	0.58	NA	NA	NA	NA
Cortical surface area of the right lateral orbital frontal cortex	IDP.0693	CES	6	308.76	mm2	1.02	0.76	1.36	0.91	1.02	0.75	1.38	0.91	1	0.69	1.46	0.98	1.31	0.63	2.7	0.39	1.91	0.15	24.9	0.52	NA	NA	NA	NA
ISOVF in the left inferior longitudinal fasciculus	IDP.2114	AIS	16	0.01	AU	1	0.92	1.08	0.91	1	0.92	1.08	0.91	0.97	0.87	1.08	0.55	0.94	0.79	1.11	0.43	0.77	0.56	1.06	0.1	NA	NA	NA	NA
OD in the left cerebral peduncle	IDP.1992	SVS	12	0.01	AU	1.01	0.79	1.31	0.91	1	0.76	1.31	0.99	0.94	0.66	1.33	0.72	0.94	0.54	1.62	0.8	0.61	0.17	2.23	0.42	NA	NA	NA	NA
ISOVF in the right cerebral peduncle	IDP.2066	AIS	3	0.02	AU	0.98	0.72	1.34	0.92	1	0.74	1.34	0.99	1.02	0.76	1.36	0.9	1.12	0.39	3.22	0.69	1.42	0	821527107149298	0.92	NA	NA	NA	NA
FA in the right cingulum hippocampus	IDP.1488	AS	9	0.04	AU	0.99	0.88	1.12	0.92	0.99	0.87	1.13	0.92	1.04	0.89	1.22	0.63	1.06	0.79	1.43	0.65	0.75	0.4	1.41	0.32	NA	NA	NA	NA
MD in the retrolenticular part of the right internal capsule	IDP.1622	SVS	13	3.68e-05	AU	1.01	0.81	1.27	0.93	1.01	0.8	1.28	0.93	0.95	0.69	1.3	0.73	0.93	0.63	1.36	0.67	0.77	0.39	1.51	0.41	NA	NA	NA	NA
MD in the right superior thalamic radiation	IDP.1818	SVS	10	3.27e-05	AU	1.01	0.77	1.31	0.96	0.98	0.74	1.28	0.86	0.9	0.63	1.29	0.57	0.92	0.55	1.54	0.73	1.06	0.4	2.81	0.89	NA	NA	NA	NA
Volume of the right caudate	IDP.0014	SVS	24	448.62	mm3	1	0.83	1.22	0.96	1.03	0.84	1.27	0.76	1.03	0.78	1.36	0.84	1.23	0.75	2.01	0.39	1.83	0.71	4.68	0.2	NA	NA	NA	NA
ISOVF in the right cerebral peduncle	IDP.2066	CES	3	0.02	AU	1.01	0.65	1.56	0.96	1.01	0.65	1.58	0.96	0.98	0.59	1.63	0.93	0.96	0.27	3.48	0.91	1.72	0	1226746968828930	0.87	NA	NA	NA	NA
FA in the right inferior cerebellar peduncle	IDP.1462	SVS	8	0.03	AU	1.01	0.74	1.37	0.96	1.01	0.73	1.39	0.96	1.11	0.75	1.65	0.59	1.14	0.6	2.18	0.64	1.47	0.33	6.45	0.55	NA	NA	NA	NA
ISOVF in the right inferior longitudinal fasciculus	IDP.2115	AS	25	0.01	AU	1	0.94	1.07	0.97	1	0.93	1.06	0.91	0.95	0.88	1.04	0.28	0.95	0.84	1.07	0.39	0.88	0.7	1.11	0.28	NA	NA	NA	NA
Cortical surface area of the right inferior parietal cortex	IDP.0689	CES	10	729.54	mm2	0.99	0.74	1.33	0.97	0.99	0.73	1.35	0.95	0.97	0.68	1.37	0.85	1	0.5	2.01	0.99	0.64	0.11	3.75	0.57	NA	NA	NA	NA
ISOVF in the left inferior fronto-occipital fasciculus	IDP.2112	AS	13	0.01	AU	1	0.92	1.08	0.97	0.99	0.91	1.08	0.89	0.97	0.87	1.08	0.6	0.96	0.83	1.12	0.58	0.8	0.6	1.07	0.12	NA	NA	NA	NA
MD in the right cingulum cingulate gyrus part	IDP.1636	AS	20	2.93e-05	AU	1	0.94	1.07	0.97	1	0.93	1.07	0.95	1.02	0.93	1.12	0.68	1.02	0.92	1.14	0.67	1.04	0.86	1.25	0.66	NA	NA	NA	NA
MO in the right sagittal stratum	IDP.1557	AIS	4	0.08	AU	1	0.82	1.22	0.97	1	0.82	1.23	0.97	0.99	0.79	1.25	0.96	1.01	0.64	1.59	0.97	0.81	0.11	6.09	0.69	NA	NA	NA	NA
MD in the forceps minor	IDP.1805	AIS	22	3.73e-05	AU	1	0.93	1.07	0.97	1	0.93	1.08	0.98	1.03	0.93	1.14	0.58	1.03	0.91	1.17	0.6	1.1	0.89	1.37	0.34	NA	NA	NA	NA
FA in the left cerebral peduncle	IDP.1467	SVS	8	0.02	AU	1	0.73	1.35	0.98	1	0.73	1.37	0.99	1.02	0.69	1.5	0.93	1.03	0.55	1.95	0.91	1.21	0.15	9.81	0.83	NA	NA	NA	NA
MD in the body of corpus callosum	IDP.1605	AS	14	4.09e-05	AU	1	0.91	1.1	0.98	1	0.91	1.11	0.93	1.08	0.94	1.23	0.28	1.06	0.9	1.25	0.44	1.14	0.84	1.55	0.37	NA	NA	NA	NA
ISOVF in the right anterior corona radiata	IDP.2074	SVS	14	0.01	AU	1	0.8	1.24	0.98	1	0.8	1.25	0.99	1.01	0.76	1.35	0.94	0.85	0.5	1.45	0.52	1.45	0.43	4.87	0.52	NA	NA	NA	NA
MD in the right inferior fronto-occipital fasciculus	IDP.1807	AIS	21	3.83e-05	AU	1	0.93	1.08	0.98	1	0.93	1.08	0.97	1.03	0.92	1.14	0.65	1.01	0.88	1.15	0.89	1.1	0.89	1.37	0.35	NA	NA	NA	NA
Cortical surface area of the right middle temporal gyrus	IDP.0696	CES	4	408.83	mm2	1	0.66	1.53	0.98	1	0.65	1.56	0.98	1.09	0.67	1.78	0.73	1.13	0.38	3.35	0.75	0.61	0	2214.06	0.82	NA	NA	NA	NA
Cortical surface area of the left superior parietal gyrus	IDP.0676	SVS	13	647.16	mm2	1	0.8	1.26	0.99	1	0.79	1.27	0.99	0.94	0.7	1.27	0.69	0.87	0.52	1.45	0.56	1.87	0.77	4.56	0.15	NA	NA	NA	NA
Cortical surface area of the left precentral gyrus	IDP.0671	AS	6	498.83	mm2	1	0.92	1.09	0.99	1	0.91	1.1	0.99	0.99	0.9	1.09	0.86	0.99	0.87	1.12	0.84	0.99	0.83	1.19	0.91	NA	NA	NA	NA
ISOVF in the left anterior corona radiata	IDP.2075	AIS	11	0.02	AU	1	0.9	1.11	0.99	1	0.88	1.12	0.94	1.02	0.89	1.18	0.75	1.07	0.81	1.41	0.6	0.86	0.44	1.69	0.62	NA	NA	NA	NA
FA in the right medial lemniscus	IDP.1460	SVS	6	0.03	AU	1	0.69	1.44	1	0.96	0.66	1.41	0.85	0.94	0.6	1.46	0.77	0.91	0.43	1.93	0.77	1.17	0.03	45.57	0.91	NA	NA	NA	NA
ISOVF in the body of corpus callosum	IDP.2055	AS	13	0.02	AU	1	0.9	1.11	1	1	0.9	1.12	0.99	0.97	0.85	1.11	0.68	0.93	0.72	1.22	0.59	1.31	0.62	2.76	0.44	NA	NA	NA	NA
Volume of the left fusiform gyrus	IDP.0349	AIS	1	1336.46	mm3	NA	NA	NA	NA	0.87	0.56	1.33	0.51	NA	NA	NA	NA	NA	NA	NA	NA	NA	NA	NA	NA	0.87	0.57	1.31	0.5
Volume of the left fusiform gyrus	IDP.0349	CES	1	1336.46	mm3	NA	NA	NA	NA	0.95	0.44	2.05	0.9	NA	NA	NA	NA	NA	NA	NA	NA	NA	NA	NA	NA	0.95	0.45	2.01	0.9
Volume of the left fusiform gyrus	IDP.0349	AS	1	1336.46	mm3	NA	NA	NA	NA	0.76	0.5	1.14	0.18	NA	NA	NA	NA	NA	NA	NA	NA	NA	NA	NA	NA	0.76	0.51	1.12	0.16
ISOVF in the right superior fronto-occipital fasciculus	IDP.2094	AS	1	0.03	AU	NA	NA	NA	NA	1.64	1.02	2.64	0.04	NA	NA	NA	NA	NA	NA	NA	NA	NA	NA	NA	NA	1.64	1.06	2.53	0.03
ISOVF in the right superior fronto-occipital fasciculus	IDP.2094	AIS	1	0.03	AU	NA	NA	NA	NA	1.91	1.14	3.2	0.01	NA	NA	NA	NA	NA	NA	NA	NA	NA	NA	NA	NA	1.91	1.2	3.02	0.00592
ISOVF in the right superior fronto-occipital fasciculus	IDP.2094	SVS	1	0.03	AU	NA	NA	NA	NA	5.42	1.65	17.82	0.00542	NA	NA	NA	NA	NA	NA	NA	NA	NA	NA	NA	NA	5.42	1.95	15.04	0.00118
ISOVF in the posterior limb of the right internal capsule	IDP.2070	AS	1	0.02	AU	NA	NA	NA	NA	1.3	0.83	2.02	0.25	NA	NA	NA	NA	NA	NA	NA	NA	NA	NA	NA	NA	1.3	0.85	1.98	0.22
ISOVF in the posterior limb of the right internal capsule	IDP.2070	AIS	1	0.02	AU	NA	NA	NA	NA	1.33	0.82	2.15	0.25	NA	NA	NA	NA	NA	NA	NA	NA	NA	NA	NA	NA	1.33	0.84	2.1	0.23
ISOVF in the posterior limb of the right internal capsule	IDP.2070	SVS	1	0.02	AU	NA	NA	NA	NA	1.02	0.34	3.07	0.97	NA	NA	NA	NA	NA	NA	NA	NA	NA	NA	NA	NA	1.02	0.35	2.98	0.97
ISOVF in the left superior fronto-occipital fasciculus	IDP.2095	AS	1	0.04	AU	NA	NA	NA	NA	1.55	1.03	2.31	0.03	NA	NA	NA	NA	NA	NA	NA	NA	NA	NA	NA	NA	1.55	1.07	2.23	0.02
ISOVF in the left superior fronto-occipital fasciculus	IDP.2095	AIS	1	0.04	AU	NA	NA	NA	NA	1.44	0.97	2.15	0.07	NA	NA	NA	NA	NA	NA	NA	NA	NA	NA	NA	NA	1.44	0.99	2.09	0.05
MO in the right superior cerebellar peduncle	IDP.1539	SVS	1	0.03	AU	NA	NA	NA	NA	1.64	0.53	5.04	0.39	NA	NA	NA	NA	NA	NA	NA	NA	NA	NA	NA	NA	1.64	0.55	4.84	0.37

[truncated: 3 more sheets: Table S10, Table S11, Table S12]
